# Supplementary material for: Enhanced UV-B Radiation in Potato Stems and Leaves Promotes the Accumulation of Anthocyanins in Tubers
Source: MDPI journal article supplement (doi:10.3390/cimb45120621), 2023-12-11
Supplement: s1 [file s1]

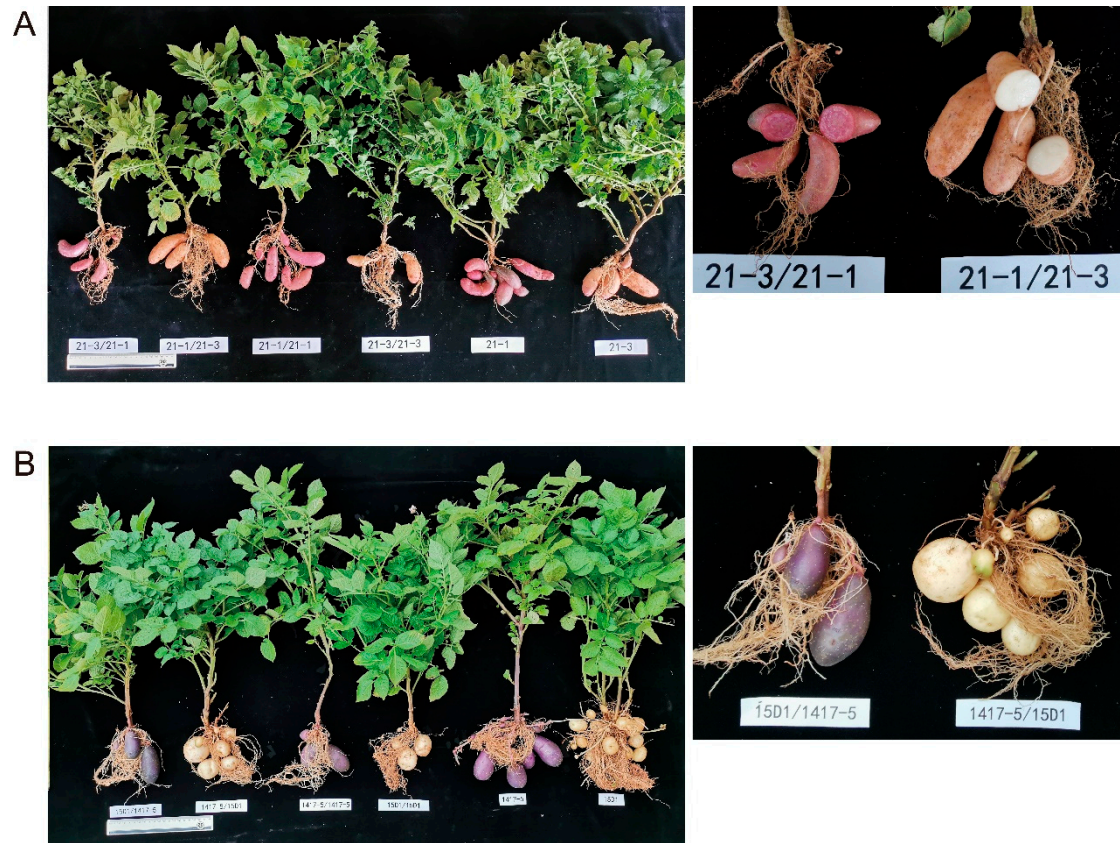

**Figure S1.** The photographs of the reciprocal grafting combinations with colored and uncolored potatoes. **(A)** The right shows reciprocal grafting plants with red-fleshed potato ‘21-1’ and white-fleshed potato ‘21-3’, and the left shows tuber color phenotype. **(B)** The right shows reciprocal grafting plants with purple-fleshed potato ‘1417-5’ and white-fleshed potato ‘15D1’, and the left shows tuber color phenotype.

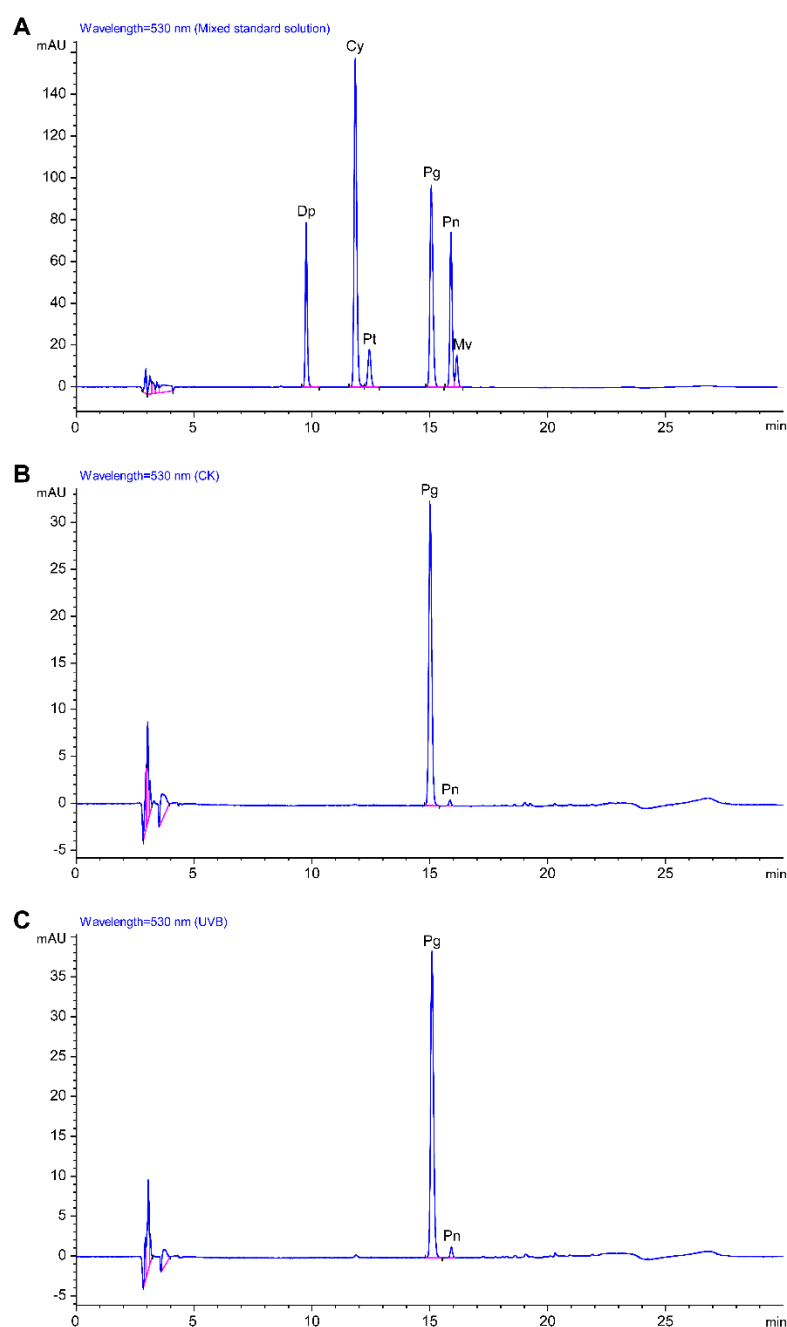

**Figure S2.** A representative mixed standard solution chromatogram and two tuber flesh sample solutions chromatograms. **(A)** The chromatogram of 5 mg/L mixed standard solution shows the separation of six anthocyanidins standards. **(B)** and **(C)** shows the chromatograms of CK and UVB samples, respectively. Pg and Pn were detected in CK and UVB samples.

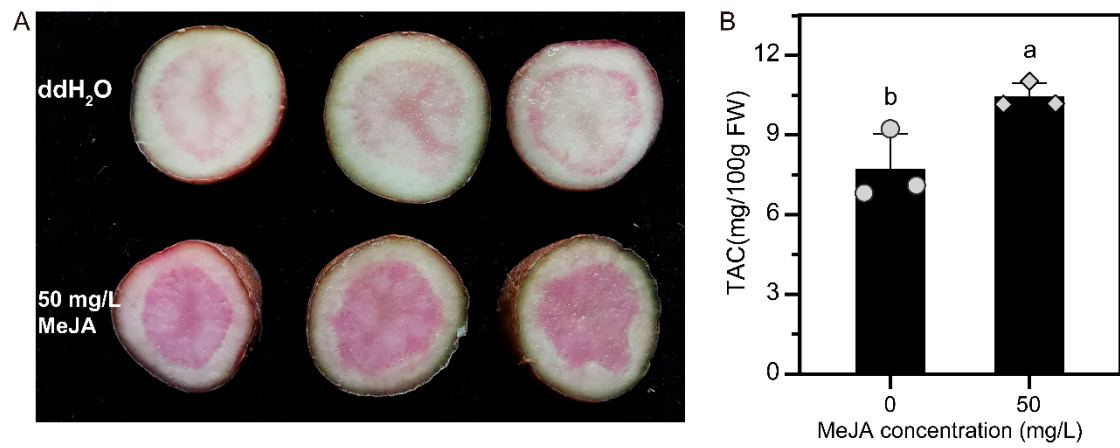

**Figure S3.** Exogenous methyl jasmonate (MeJA) spraying treatment. **(A)** The tuber photographs of red-fleshed potato clone ‘21-1’ after 20 days of exogenous 50 mg/L MeJA and purified water (CK) spraying leaf. **(B)** Total anthocyanins content (TAC) of red-fleshed potato clone ‘21-1’ after 20 days of exogenous 50 mg/L MeJA and purified water (CK) spraying leaf. The bars represent means  $\pm$  SD, and the lowercase letters represent significant differences (*t*-test,  $n=3$ ,  $p<0.05$ ).
