# Supplementary material for: Enhanced UV-B Radiation in Potato Stems and Leaves Promotes the Accumulation of Anthocyanins in Tubers
Source: Curr Issues Mol Biol. 2023 Dec 11;45(12):9943–60. doi: 10.3390/cimb45120621 (PMC10742819; doi:10.3390/cimb45120621)
Supplement: Supplementary file 1 [file cimb-45-00621-s001.zip › supplementary table S1-S7.xlsx]

## Sheet: Table S1
Table S1. All genes' FPKM from RNA-seq
gene_id	BaseMean_DESeq2	BaseMean_control_K	BaseMean_case_U	FoldChange	log2FoldChange	p-value	q-value	Regulation	UVB20_1_FPKM	UVB20_2_FPKM	UVB20_3_FPKM	CK20_1_FPKM	CK20_2_FPKM	CK20_3_FPKM	gene_Dbxref	gene_symbol	description	GO_id	GO_term	pathway	pathway_description
Soltu.DM.01G000010	971.349	1033.24	909.459	0.880074	-0.184304	0.0759476	0.179659	Down	9.3245	9.74627	8.61514	10.0917	10.8784	10.6881	102603953	RFC3	Replication factor C subunit 3	GO:0005663,GO:0005634,GO:0005524,GO:0003677,GO:0006261	DNA replication factor C complex|nucleus|ATP binding|DNA binding|DNA-dependent DNA replication	sot03030,sot03420,sot03430	DNA replication|Nucleotide excision repair|Mismatch repair
Soltu.DM.01G000020	4.09674	3.96809	4.22539	1.06561	0.0916851	0.946652	0.970153	Up	0.126879	0.959903	0.475834	0	0.713866	0.764702	102603276		Defensin J1-2	GO:0005576,GO:0050832,GO:0031640	extracellular region|defense response to fungus|killing of cells of other organism
Soltu.DM.01G000030	19.4308	16.7529	22.1087	1.32351	0.404374	0.526724	0.693333	Up	0.104845	0.45326	0.407243	0.25396	0.182586	0.300906	102578660	GAD	Glutamate decarboxylase	GO:0005516,GO:0004351,GO:0030170,GO:0006536	calmodulin binding|glutamate decarboxylase activity|pyridoxal phosphate binding|glutamate metabolic process	sot00250,sot00410,sot00430,sot00650	Alanine, aspartate and glutamate metabolism|beta-Alanine metabolism|Taurine and hypotaurine metabolism|Butanoate metabolism
Soltu.DM.01G000040	4.90894	1.96768	7.85019	3.96668	1.98793	0.107639	0.233834	Up	0.0902269	0.153587	0.169189	0	0.0676864	0.0362533	102603025	XRI1	Protein XRI1	GO:0005634,GO:0006281,GO:0007143,GO:0007140,GO:0009555,GO:0010165	nucleus|DNA repair|female meiotic nuclear division|male meiotic nuclear division|pollen development|response to X-ray
Soltu.DM.01G000050	1107.05	1050.6	1163.5	1.10746	0.147261	0.137144	0.279803	Up	8.73682	9.52755	9.07555	7.78959	8.51772	8.54137	102602690	NHX7	Sodium/hydrogen exchanger 7	GO:0009941,GO:0016021,GO:0005886,GO:0015386,GO:0015385,GO:0071805,GO:0051453,GO:2000377,GO:0042542,GO:0006979,GO:0000302,GO:0009651,GO:0098719,GO:0006814	chloroplast envelope|integral component of membrane|plasma membrane|potassium:proton antiporter activity|sodium:proton antiporter activity|potassium ion transmembrane transport|regulation of intracellular pH|regulation of reactive oxygen species metabolic process|response to hydrogen peroxide|response to oxidative stress|response to reactive oxygen species|response to salt stress|sodium ion impor…
Soltu.DM.01G000060	2402.43	2571.85	2233.01	0.868265	-0.203793	0.00989339	0.0345555	Down	16.8361	17.3201	17.3273	19.1032	19.9329	20.6533	102602127	KEG	E3 ubiquitin-protein ligase KEG	GO:0005769,GO:0005802,GO:0005524,GO:0046872,GO:0004672,GO:0043621,GO:0004674,GO:0004842,GO:0009738,GO:0006952,GO:0048589,GO:0016197,GO:0045324,GO:0009788,GO:0016567,GO:0009737,GO:0032940	early endosome|trans-Golgi network|ATP binding|metal ion binding|protein kinase activity|protein self-association|protein serine/threonine kinase activity|ubiquitin-protein transferase activity|abscisic acid-activated signaling pathway|defense response|developmental growth|endosomal transport|late endosome to vacuole transport|negative regulation of abscisic acid-activated signaling pathway|prote…
Soltu.DM.01G000090	2173.63	2209.3	2137.96	0.967711	-0.0473525	0.595358	0.746255	Down	41.3004	38.6132	37.155	41.6423	37.1786	42.9956	102601794	IDD14	Protein indeterminate-domain 14	GO:0005634,GO:0003700,GO:0046872,GO:0046982,GO:0043621,GO:0044212,GO:0048444,GO:0009630,GO:0009965,GO:0010601,GO:2000012,GO:2000904,GO:0006355	nucleus|DNA-binding transcription factor activity|metal ion binding|protein heterodimerization activity|protein self-association|transcription regulatory region DNA binding|floral organ morphogenesis|gravitropism|leaf morphogenesis|positive regulation of auxin biosynthetic process|regulation of auxin polar transport|regulation of starch metabolic process|regulation of transcription, DNA-templated
Soltu.DM.01G000120	3056.54	3164.91	2948.17	0.931561	-0.102278	0.229919	0.400599	Down	26.229	26.078	24.3492	28.2332	25.0472	29.5901	102601237	MAP65-6	65-kDa microtubule-associated protein 6	GO:0005874,GO:0005739,GO:0005634,GO:0009524,GO:0009536,GO:0009574,GO:0008017,GO:0007049,GO:0051301,GO:0000226	microtubule|mitochondrion|nucleus|phragmoplast|plastid|preprophase band|microtubule binding|cell cycle|cell division|microtubule cytoskeleton organization
Soltu.DM.01G000140	182.279	189.867	174.692	0.918849	-0.1221	0.60142	0.750923	Down	4.71244	3.59533	3.28701	3.61026	5.44365	3.61313	102600453
Soltu.DM.01G000150	241.006	231.419	250.592	1.08286	0.114843	0.543763	0.706557	Up	26.1448	22.4523	21.6288	26.1725	18.9283	20.1796	102600116	DPMS3	Dolichol-phosphate mannose synthase subunit 3	GO:0033185,GO:0005783,GO:0005789,GO:0016021,GO:0006506,GO:0097502,GO:0006486	dolichol-phosphate-mannose synthase complex|endoplasmic reticulum|endoplasmic reticulum membrane|integral component of membrane|GPI anchor biosynthetic process|mannosylation|protein glycosylation	sot00510	N-Glycan biosynthesis
Soltu.DM.01G000160	521.152	627.041	415.264	0.662253	-0.594546	1.65e-06	1.39e-05	Down	7.38495	7.15758	7.69901	10.7737	11.3695	11.6624	102599785	XTH28	Probable xyloglucan endotransglucosylase/hydrolase protein 28	GO:0048046,GO:0005618,GO:0004553,GO:0016762,GO:0042546,GO:0071555,GO:0010154,GO:0080086,GO:0010411	apoplast|cell wall|hydrolase activity, hydrolyzing O-glycosyl compounds|xyloglucan:xyloglucosyl transferase activity|cell wall biogenesis|cell wall organization|fruit development|stamen filament development|xyloglucan metabolic process
Soltu.DM.01G000170	911.774	968.837	854.711	0.881951	-0.18123	0.131873	0.271591	Down	16.0183	14.421	16.3021	15.7146	20.1039	17.4846	102599457	ZFP4	Zinc finger protein 4	GO:0005634,GO:0003700,GO:0046872,GO:0043565,GO:0044212,GO:0009738,GO:0019760,GO:0009788,GO:0006355	nucleus|DNA-binding transcription factor activity|metal ion binding|sequence-specific DNA binding|transcription regulatory region DNA binding|abscisic acid-activated signaling pathway|glucosinolate metabolic process|negative regulation of abscisic acid-activated signaling pathway|regulation of transcription, DNA-templated
Soltu.DM.01G000190	6.47789	8.70648	4.24931	0.489482	-1.03067	0.303299	0.484975	Down	0.385781	0.243219	0.964529	1.02607	0.844098	1.4209
Soltu.DM.01G000200	155.129	167.844	142.414	0.847789	-0.238222	0.281089	0.46135	Down	2.07306	1.9877	1.91666	2.03894	2.86194	2.18362	102598799	OBE3	Protein OBERON 3	GO:0005634,GO:0046872,GO:0001708,GO:0090421,GO:0009880,GO:0010078,GO:0010492,GO:0010468,GO:0010071	nucleus|metal ion binding|cell fate specification|embryonic meristem initiation|embryonic pattern specification|maintenance of root meristem identity|maintenance of shoot apical meristem identity|regulation of gene expression|root meristem specification
Soltu.DM.01G000210	97.5115	109.081	85.942	0.786904	-0.34574	0.220978	0.39019	Down	1.78871	1.18409	1.50934	1.92677	2.26438	1.52725	102599131	OBE3	Protein OBERON 3	GO:0005634,GO:0046872,GO:0001708,GO:0090421,GO:0009880,GO:0010078,GO:0010492,GO:0010468,GO:0010071	nucleus|metal ion binding|cell fate specification|embryonic meristem initiation|embryonic pattern specification|maintenance of root meristem identity|maintenance of shoot apical meristem identity|regulation of gene expression|root meristem specification
Soltu.DM.01G000220	2186.95	2945.32	1428.59	0.485024	-1.04387	6.39e-17	1.78e-15	Down	33.2439	24.6218	33.1141	72.8501	55.2809	60.6876	102598463		Probable ascorbate-specific transmembrane electron transporter 1	GO:0016021,GO:0046872,GO:0016491	integral component of membrane|metal ion binding|oxidoreductase activity
Soltu.DM.01G000230	80.0491	63.8968	96.2013	1.50718	0.59185	0.0568845	0.143472	Up	2.13127	3.26195	2.47149	1.56632	1.44631	2.25354	102605721	CYB561C	Probable transmembrane ascorbate ferrireductase 3	GO:0016021,GO:0046872,GO:0016491	integral component of membrane|metal ion binding|oxidoreductase activity
Soltu.DM.01G000240	12825.1	12817.7	12832.5	1.00116	0.00167535	0.981278	0.989737	Up	208.287	203.362	223.355	203.275	210.372	224.893	102598134	PUB21	U-box domain-containing protein 21	GO:0004842,GO:0010200	ubiquitin-protein transferase activity|response to chitin
Soltu.DM.01G000250	56.3595	63.2567	49.4622	0.781382	-0.355901	0.289883	0.470595	Down	0.836265	0.744324	0.784061	0.834086	1.12246	1.0871	102605376		Putative clathrin assembly protein At2g01600	GO:0005905,GO:0030136,GO:0005794,GO:0016020,GO:0005886,GO:0005545,GO:0030276,GO:0048268,GO:0006897	clathrin-coated pit|clathrin-coated vesicle|Golgi apparatus|membrane|plasma membrane|1-phosphatidylinositol binding|clathrin binding|clathrin coat assembly|endocytosis
Soltu.DM.01G000260	1.61452	0.644985	2.58406	3.96825	1.9885	0.386332	0.570826	Up	0	0.281222	0.278809	0	0.139427	0
Soltu.DM.01G000270	13.5213	14.6846	12.3579	0.843188	-0.246073	0.776892	0.872569	Down	0.0961205	0.757499	0.300401	0.09587	0.420628	0.86898	107058262	ZFP3	Zinc finger protein 3	GO:0005634,GO:0003700,GO:0046872,GO:0044212,GO:0009738,GO:0009788,GO:0006355	nucleus|DNA-binding transcription factor activity|metal ion binding|transcription regulatory region DNA binding|abscisic acid-activated signaling pathway|negative regulation of abscisic acid-activated signaling pathway|regulation of transcription, DNA-templated
Soltu.DM.01G000280	18.4031	23.4003	13.4059	0.573919	-0.801082	0.24169	0.414722	Down	0.319327	0.120793	0.80836	0.955483	0.658769	0.577376	102605040	ZFP3	Zinc finger protein 3	GO:0005634,GO:0003700,GO:0046872,GO:0044212,GO:0009738,GO:0009788,GO:0006355	nucleus|DNA-binding transcription factor activity|metal ion binding|transcription regulatory region DNA binding|abscisic acid-activated signaling pathway|negative regulation of abscisic acid-activated signaling pathway|regulation of transcription, DNA-templated
Soltu.DM.01G000290	3927.57	4208.33	3646.81	0.866462	-0.206792	0.0616772	0.15269	Down	26.5937	21.637	20.5657	22.891	27.4981	29.5408	102597825	TPS6	Alpha,alpha-trehalose-phosphate synthase [UDP-forming] 6	GO:0005737,GO:0003825,GO:0004805,GO:0005992,GO:0070413	cytoplasm|alpha,alpha-trehalose-phosphate synthase (UDP-forming) activity|trehalose-phosphatase activity|trehalose biosynthetic process|trehalose metabolism in response to stress	sot00500	Starch and sucrose metabolism
Soltu.DM.01G000300	127.242	68.6025	185.882	2.71318	1.43999	4.66e-08	5.1e-07	Up	1.64473	2.18867	2.53338	0.749917	0.638954	0.97948	102597512		MACPF domain-containing protein At1g14780	GO:0005886,GO:0006955,GO:0009626	plasma membrane|immune response|plant-type hypersensitive response
Soltu.DM.01G000310	21.5431	20.5397	22.5465	1.0978	0.134618	0.812639	0.894313	Up	0.348471	0.709787	0.703699	0.427769	0.754084	0.430818	102604699	LAMT	Loganic acid O-methyltransferase
Soltu.DM.01G000320	52.0238	67.0323	37.0154	0.552485	-0.855993	0.0295381	0.0846045	Down	1.10746	1.39641	1.92282	2.70006	3.53856	1.81287	102604370	LAMT	Loganic acid O-methyltransferase
Soltu.DM.01G000330	2.50656	3.70276	1.31036	0.355169	-1.49342	0.339468	0.524404	Down	0.022693	0.0214605	0.0425528	0.135803	0.0425596	0.0683855	102597182	LAMT	Loganic acid O-methyltransferase
Soltu.DM.01G000340	4.89156	2.00579	7.77733	3.87002	1.95234	0.181868	0.342133	Up	1.38266	0.461492	0	0.324483	0.152535	0	102591096	LAMT	Loganic acid O-methyltransferase
Soltu.DM.01G000350	1673.64	1650.56	1696.71	1.02783	0.0396006	0.657793	0.79253	Up	20.9596	19.4961	20.2844	18.5536	20.2761	20.647	102596625	AK2	Aspartokinase 2, chloroplastic	GO:0009570,GO:0004072,GO:0005524,GO:0009089,GO:0009088	chloroplast stroma|aspartate kinase activity|ATP binding|lysine biosynthetic process via diaminopimelate|threonine biosynthetic process	sot00260,sot00261,sot00270,sot00300	Glycine, serine and threonine metabolism|Monobactam biosynthesis|Cysteine and methionine metabolism|Lysine biosynthesis
Soltu.DM.01G000360	647.519	631.834	663.204	1.04943	0.0696099	0.565797	0.723868	Up	12.6602	13.3533	11.1314	11.5733	12.232	11.8102	102596301	HOM2	Aspartate-semialdehyde dehydrogenase	GO:0005737,GO:0004073,GO:0051287,GO:0050661,GO:0046983,GO:0009090,GO:0009097,GO:0009089,GO:0009086,GO:0009088	cytoplasm|aspartate-semialdehyde dehydrogenase activity|NAD binding|NADP binding|protein dimerization activity|homoserine biosynthetic process|isoleucine biosynthetic process|lysine biosynthetic process via diaminopimelate|methionine biosynthetic process|threonine biosynthetic process	sot00260,sot00261,sot00270,sot00300	Glycine, serine and threonine metabolism|Monobactam biosynthesis|Cysteine and methionine metabolism|Lysine biosynthesis
Soltu.DM.01G000370	26.6866	22.5742	30.799	1.36141	0.445107	0.378466	0.562775	Up	1.98921	1.77948	1.05853	0.911578	1.51243	1.13409
Soltu.DM.01G000380	209.057	195.966	222.149	1.13352	0.180813	0.323626	0.507744	Up	4.1683	4.73029	4.27031	3.56931	4.09939	4.02367	102595628	SEC14	SEC14 cytosolic factor	GO:0005829,GO:0000139,GO:0008525,GO:0008526,GO:0030437,GO:0043001,GO:0006896,GO:0048194,GO:2001246,GO:1901352,GO:0046488	cytosol|Golgi membrane|phosphatidylcholine transporter activity|phosphatidylinositol transporter activity|ascospore formation|Golgi to plasma membrane protein transport|Golgi to vacuole transport|Golgi vesicle budding|negative regulation of phosphatidylcholine biosynthetic process|negative regulation of phosphatidylglycerol biosynthetic process|phosphatidylinositol metabolic process
Soltu.DM.01G000390	112.686	105.048	120.325	1.1451	0.195477	0.419519	0.601467	Up	2.61829	2.13662	2.65281	2.21132	2.21763	2.07861	102595088	sec14	Sec14 cytosolic factor	GO:0032153,GO:0060187,GO:0051286,GO:0035838,GO:0005634,GO:0005628,GO:0120014,GO:0008525,GO:0008526,GO:0030437,GO:0031322,GO:0048193,GO:0120010,GO:0015031	cell division site|cell pole|cell tip|growing cell tip|nucleus|prospore membrane|intermembrane phospholipid transfer activity|phosphatidylcholine transporter activity|phosphatidylinositol transporter activity|ascospore formation|ascospore-type prospore-specific spindle pole body remodeling|Golgi vesicle transport|intermembrane phospholipid transfer|protein transport
Soltu.DM.01G000400	5.21029	2.57994	7.84065	3.01429	1.59182	0.238292	0.410778	Up	0.163879	0.185974	0.399488	0	0.245878	0	102594752	sec14	Sec14 cytosolic factor	GO:0032153,GO:0060187,GO:0051286,GO:0035838,GO:0005634,GO:0005628,GO:0120014,GO:0008525,GO:0008526,GO:0030437,GO:0031322,GO:0048193,GO:0120010,GO:0015031	cell division site|cell pole|cell tip|growing cell tip|nucleus|prospore membrane|intermembrane phospholipid transfer activity|phosphatidylcholine transporter activity|phosphatidylinositol transporter activity|ascospore formation|ascospore-type prospore-specific spindle pole body remodeling|Golgi vesicle transport|intermembrane phospholipid transfer|protein transport
Soltu.DM.01G000410	3.47912	2.70256	4.25568	1.58164	0.661423	0.626029	0.769016	Up	0.106921	0.134818	0.200492	0.213284	0.0334207	0.0358007	102602271	RPP13L3	Putative disease resistance RPP13-like protein 3
Soltu.DM.01G000420	110.617	55.3238	165.91	3.00375	1.58676	2.44e-09	3.2e-08	Up	2.20906	2.3569	2.28358	0.87567	0.544429	0.881911		R1A-6	Putative late blight resistance protein homolog R1A-6	GO:0005737,GO:0016020,GO:0043531,GO:0005524,GO:0009626	cytoplasm|membrane|ADP binding|ATP binding|plant-type hypersensitive response
Soltu.DM.01G000430	26.1633	14.638	37.6885	2.57434	1.3642	0.00987688	0.0345076	Up	0.646281	0.674405	1.1283	0.377867	0.376159	0.201473	102602606	RPP13L3	Putative disease resistance RPP13-like protein 3
Soltu.DM.01G000440	350.267	206.625	493.909	2.38979	1.25689	5.39e-15	1.28e-13	Up	2.33751	2.66217	2.23872	0.867388	1.06533	1.11595		R1A-6	Putative late blight resistance protein homolog R1A-6	GO:0005737,GO:0016020,GO:0043531,GO:0005524,GO:0009626	cytoplasm|membrane|ADP binding|ATP binding|plant-type hypersensitive response
Soltu.DM.01G000450	172.945	102.931	242.959	2.36214	1.24009	2.28e-09	3e-08	Up	2.30821	2.82122	2.58265	1.21625	0.990346	1.08274		R1A-10	Putative late blight resistance protein homolog R1A-10	GO:0005737,GO:0016020,GO:0043531,GO:0005524,GO:0009626	cytoplasm|membrane|ADP binding|ATP binding|plant-type hypersensitive response
Soltu.DM.01G000460	42.2605	25.3924	59.1286	2.33039	1.22057	0.00410302	0.0163294	Up	0.424149	0.564831	0.503175	0.310807	0.202926	0.130426		R1B-16	Putative late blight resistance protein homolog R1B-16	GO:0005737,GO:0016020,GO:0043531,GO:0005524,GO:0009626	cytoplasm|membrane|ADP binding|ATP binding|plant-type hypersensitive response
Soltu.DM.01G000470	159.172	108.813	209.531	1.9253	0.945083	2.15e-05	0.00014868	Up	2.33065	2.43768	1.79243	1.02838	1.09779	1.30543	102602606	R1A-6	Putative late blight resistance protein homolog R1A-6	GO:0005737,GO:0016020,GO:0043531,GO:0005524,GO:0009626	cytoplasm|membrane|ADP binding|ATP binding|plant-type hypersensitive response
Soltu.DM.01G000480	57.3615	28.9441	85.779	2.96172	1.56643	9.52e-06	7.06e-05	Up	0.799472	1.12357	0.85367	0.29902	0.36443	0.278844	102594192	R1A-6	Putative late blight resistance protein homolog R1A-6	GO:0005737,GO:0016020,GO:0043531,GO:0005524,GO:0009626	cytoplasm|membrane|ADP binding|ATP binding|plant-type hypersensitive response
Soltu.DM.01G000490	2593.66	2679.04	2508.27	0.936114	-0.0952443	0.281729	0.462007	Down	32.8787	31.929	28.892	31.2849	35.2287	34.2108	102593553	ADO3	Adagio protein 3	GO:0005829,GO:0005634,GO:0019005,GO:0009881,GO:0007623,GO:0009908,GO:0009911,GO:0016567,GO:0018298,GO:0010468,GO:0006355,GO:0009637	cytosol|nucleus|SCF ubiquitin ligase complex|photoreceptor activity|circadian rhythm|flower development|positive regulation of flower development|protein ubiquitination|protein-chromophore linkage|regulation of gene expression|regulation of transcription, DNA-templated|response to blue light	sot04712	Circadian rhythm - plant
Soltu.DM.01G000510	1258.06	1214.7	1301.42	1.07142	0.0995212	0.348042	0.533242	Up	12.8867	12.7075	14.5841	11.3112	12.8587	13.583	102592543	MAP70.1	Microtubule-associated protein 70-1	GO:0010005,GO:0009524,GO:0005819,GO:0008017,GO:0071555,GO:0007010,GO:0009832,GO:0010051	cortical microtubule, transverse to long axis|phragmoplast|spindle|microtubule binding|cell wall organization|cytoskeleton organization|plant-type cell wall biogenesis|xylem and phloem pattern formation
Soltu.DM.01G000520	1150.69	1040.38	1260.99	1.21219	0.277618	0.00395179	0.0157988	Up	9.76393	10.4353	10.5338	8.20434	8.37982	8.94298	102592203		Ankyrin repeat-containing protein At2g01680	GO:0016021,GO:0005886	integral component of membrane|plasma membrane
Soltu.DM.01G000540	16.8256	15.6725	17.9786	1.14494	0.195275	0.774823	0.871041	Up	1.46817	0.668504	0.713752	0.32541	0.815847	1.36554	107058457
Soltu.DM.01G000560	10.2482	14.5843	5.91214	0.406212	-1.2997	0.214523	0.382268	Down	0.0833269	0.0945614	0.109375	0.166219	0	0.552434		LAMT	Loganic acid O-methyltransferase
Soltu.DM.01G000570	30.5082	31.2883	29.7281	0.950708	-0.0729258	0.904955	0.94774	Down	0.831259	0.336904	0.890705	0.355325	0.334068	1.503	102590739	LAMT	Loganic acid O-methyltransferase
Soltu.DM.01G000650	3.84774	4.6458	3.04968	0.652521	-0.615903	0.688472	0.814038	Down	0.194771	0.0526263	0	0	0.15655	0.223597	102603954	LAMT	Loganic acid O-methyltransferase
Soltu.DM.01G000660	601.521	548.596	654.446	1.19296	0.254543	0.0656217	0.160242	Up	19.1823	17.847	16.7947	13.674	13.676	18.1069	102603618	CML25	Probable calcium-binding protein CML25	GO:0005737,GO:0005634,GO:0005509,GO:0009409,GO:0048767	cytoplasm|nucleus|calcium ion binding|response to cold|root hair elongation	sot04626	Plant-pathogen interaction
Soltu.DM.01G000670	202.298	192.194	212.403	1.10589	0.145209	0.464432	0.640205	Up	3.03414	3.20858	3.01289	3.23494	2.2285	2.97273	102603279	set10	Ribosomal lysine N-methyltransferase set10	GO:0005829,GO:0005634,GO:0016279,GO:0018027,GO:0018026,GO:0042254	cytosol|nucleus|protein-lysine N-methyltransferase activity|peptidyl-lysine dimethylation|peptidyl-lysine monomethylation|ribosome biogenesis
Soltu.DM.01G000690	8.58826	8.39631	8.78021	1.04941	0.069574	0.940838	0.966803	Up	0.135458	0.160126	0.571509	0.168881	0.158778	0.510255	102602940	NUDT17	Nudix hydrolase 17, mitochondrial	GO:0005737,GO:0005739,GO:0005634,GO:0016787,GO:0046872	cytoplasm|mitochondrion|nucleus|hydrolase activity|metal ion binding
Soltu.DM.01G000700	31.6371	30.5436	32.7307	1.07209	0.100423	0.834962	0.906924	Up	0.985325	0.906625	0.649168	0.690586	0.49944	1.20376	102602601	PXG4	Probable peroxygenase 4	GO:0005811,GO:0005509,GO:0004497,GO:1990137,GO:0009819,GO:0009737	lipid droplet|calcium ion binding|monooxygenase activity|plant seed peroxidase activity|drought recovery|response to abscisic acid	sot00073	Cutin, suberine and wax biosynthesis
Soltu.DM.01G000710	191.009	135.081	246.938	1.8296	0.871529	5.1e-05	0.000327768	Up	7.21569	6.60716	6.79209	4.05539	2.73875	4.57326	102602267	PXG4	Probable peroxygenase 4	GO:0005811,GO:0005509,GO:0004497,GO:1990137,GO:0009819,GO:0009737	lipid droplet|calcium ion binding|monooxygenase activity|plant seed peroxidase activity|drought recovery|response to abscisic acid	sot00073	Cutin, suberine and wax biosynthesis
Soltu.DM.01G000730	23.2219	23.5213	22.9226	0.971868	-0.0411679	0.943784	0.9685	Down	4.24359	1.3377	3.01415	1.79562	4.09991	2.97097	107061428
Soltu.DM.01G000750	1817.1	1904.33	1729.87	0.908396	-0.138606	0.0959402	0.214808	Down	21.2095	20.736	21.5376	24.1296	23.1582	23.0498	102585736	PUX2	Plant UBX domain-containing protein 2	GO:0016020,GO:0046872,GO:0050832,GO:0009620	membrane|metal ion binding|defense response to fungus|response to fungus	sot04141	Protein processing in endoplasmic reticulum
Soltu.DM.01G000760	1511.5	1329.73	1693.26	1.27323	0.348491	0.000450104	0.00235318	Up	31.2675	28.327	31.7441	21.7195	24.9656	25.5169	102586069	TIFY6B	Protein TIFY 6B	GO:0005634,GO:0042802,GO:0006952,GO:0009867,GO:0031347,GO:2000022,GO:0009611	nucleus|identical protein binding|defense response|jasmonic acid mediated signaling pathway|regulation of defense response|regulation of jasmonic acid mediated signaling pathway|response to wounding	sot04075	Plant hormone signal transduction
Soltu.DM.01G000770	12.3999	7.053	17.7469	2.51986	1.33335	0.172613	0.329949	Up	0.418113	0.0219669	0.762245	0.324351	0.10891	0.0466661	102586841	SKIP28	F-box protein SKIP28	GO:0009793,GO:0016567	embryo development ending in seed dormancy|protein ubiquitination
Soltu.DM.01G000780	21.4757	17.8427	25.1087	1.40453	0.490089	0.476584	0.65186	Up	1.01085	0.593347	0.947747	0.0695321	0.915213	0.840332	102587184	DYN2	Dynein light chain 1, cytoplasmic	GO:0005868,GO:0005881,GO:0005643,GO:1990429,GO:0005777,GO:0008574,GO:0040001,GO:0030473,GO:0051292,GO:2000582	cytoplasmic dynein complex|cytoplasmic microtubule|nuclear pore|peroxisomal importomer complex|peroxisome|ATP-dependent microtubule motor activity, plus-end-directed|establishment of mitotic spindle localization|nuclear migration along microtubule|nuclear pore complex assembly|positive regulation of ATP-dependent microtubule motor activity, plus-end-directed
Soltu.DM.01G000790	336.963	245.209	428.717	1.74779	0.805531	0.000152192	0.00088696	Up	16.8767	11.9465	12.6212	5.52271	7.74184	10.6246	102587513	PCR2	Protein PLANT CADMIUM RESISTANCE 2	GO:0016021,GO:0005886,GO:0006979	integral component of membrane|plasma membrane|response to oxidative stress
Soltu.DM.01G000800	364.765	271.952	457.578	1.68131	0.749582	4.86e-06	3.79e-05	Up	5.52271	4.94316	5.311	2.61851	3.74824	3.06483	102588164		UPF0496 protein At3g19330	GO:0016021,GO:0005886	integral component of membrane|plasma membrane
Soltu.DM.01G000810	156.103	143.979	168.227	1.1689	0.225151	0.317537	0.501064	Up	4.12513	3.61294	3.75774	4.06763	2.63744	3.20195	102587838	ILL7	IAA-amino acid hydrolase ILR1-like 7	GO:0016787	hydrolase activity
Soltu.DM.01G000820	477.048	509.795	444.301	0.871652	-0.198176	0.177427	0.336572	Down	9.79581	7.96073	10.133	11.9176	9.50879	10.7915	102588705	ILL7	IAA-amino acid hydrolase ILR1-like 7	GO:0016787	hydrolase activity
Soltu.DM.01G000830	99.3736	110.122	88.6252	0.806125	-0.310924	0.302821	0.484463	Down	1.29763	1.81957	2.66398	2.65543	1.9511	2.62941	102589038	SDH	Secoisolariciresinol dehydrogenase
Soltu.DM.01G000840	2.3723	3.73414	1.01045	0.269085	-1.89387	0.308756	0.491441	Down	0.0529153	0.0250206	0	0.131943	0	0.159461	102598194	SDH	Secoisolariciresinol dehydrogenase
Soltu.DM.01G000860	107.534	50.3155	164.753	3.2719	1.71013	1.99e-10	2.98e-09	Up	4.71928	3.29235	4.37632	1.23462	1.35422	1.21751	102589358		Secoisolariciresinol dehydrogenase	GO:0102911,GO:0000166,GO:0009807,GO:0051289	(-)-secoisolariciresinol dehydrogenase activity|nucleotide binding|lignan biosynthetic process|protein homotetramerization
Soltu.DM.01G000880	187.373	180.988	193.758	1.0706	0.0984139	0.723607	0.837334	Up	3.80391	1.83358	4.79566	3.73874	3.11681	2.94925	102590017	MET1	Protein MET1, chloroplastic	GO:0009507,GO:0009941,GO:0031969,GO:0009570,GO:0009534,GO:0009535,GO:0009575,GO:0035448,GO:0009523,GO:0009579,GO:0015979,GO:0010207,GO:0010206,GO:0009644,GO:0009416,GO:0009611	chloroplast|chloroplast envelope|chloroplast membrane|chloroplast stroma|chloroplast thylakoid|chloroplast thylakoid membrane|chromoplast stroma|extrinsic component of thylakoid membrane|photosystem II|thylakoid|photosynthesis|photosystem II assembly|photosystem II repair|response to high light intensity|response to light stimulus|response to wounding
Soltu.DM.01G000900	145.728	130.397	161.059	1.23449	0.303919	0.210912	0.377659	Up	12.9913	12.5205	13.3441	7.26278	12.1047	12.3017	102590330
Soltu.DM.01G000910	862.905	909.437	816.372	0.897652	-0.155771	0.1712	0.328103	Down	11.1299	9.84798	10.5968	13.0591	11.0961	11.2467		OVA5	Lysine--tRNA ligase, chloroplastic/mitochondrial	GO:0009507,GO:0005739,GO:0005524,GO:0003677,GO:0004824,GO:0046872,GO:0006430,GO:0048481	chloroplast|mitochondrion|ATP binding|DNA binding|lysine-tRNA ligase activity|metal ion binding|lysyl-tRNA aminoacylation|plant ovule development
Soltu.DM.01G000930	2217.64	2390.11	2045.17	0.855603	-0.224987	0.00834814	0.0300336	Down	26.416	27.1601	25.3753	28.9092	32.196	31.7621	102591027
Soltu.DM.01G000940	119.966	106.035	133.896	1.26237	0.336138	0.208674	0.375011	Up	1.96783	1.83398	1.76477	1.0098	1.48425	1.94804	102591365	ICDH-1	Isocitrate dehydrogenase [NADP]	GO:0005737,GO:0004450,GO:0000287,GO:0051287,GO:0006097,GO:0006102,GO:0006099	cytoplasm|isocitrate dehydrogenase (NADP+) activity|magnesium ion binding|NAD binding|glyoxylate cycle|isocitrate metabolic process|tricarboxylic acid cycle	sot00020,sot00480,sot04146	Citrate cycle (TCA cycle)|Glutathione metabolism|Peroxisome
Soltu.DM.01G000950	623.569	605.509	641.629	1.05948	0.0833504	0.494429	0.667291	Up	16.4525	15.038	15.3551	15.9601	14.8879	13.6338	102592029
Soltu.DM.01G000960	376.771	360.308	393.233	1.09175	0.126637	0.381003	0.565662	Up	18.0377	17.8191	18.4208	17.0935	14.8278	18.1664	102592029
Soltu.DM.01G000970	1318.69	1383.21	1254.17	0.906735	-0.141247	0.115419	0.246757	Down	22.9766	22.8071	22.5764	25.1916	24.4559	26.2538	102592701	APRL5	5'-adenylylsulfate reductase-like 5	GO:0005623,GO:0016021,GO:0045454	cell|integral component of membrane|cell redox homeostasis
Soltu.DM.01G000990	2769.72	2710.39	2829.05	1.04386	0.0619332	0.428371	0.60948	Up	53.3409	53.3746	57.1448	52.548	50.876	54.6187	102593041	DTC	Mitochondrial dicarboxylate/tricarboxylate transporter DTC	GO:0005618,GO:0009507,GO:0009941,GO:0016021,GO:0005743,GO:0005739,GO:0009506,GO:0005774,GO:0005310,GO:0015367,GO:0015142,GO:0006835,GO:0035674	cell wall|chloroplast|chloroplast envelope|integral component of membrane|mitochondrial inner membrane|mitochondrion|plasmodesma|vacuolar membrane|dicarboxylic acid transmembrane transporter activity|oxoglutarate:malate antiporter activity|tricarboxylic acid transmembrane transporter activity|dicarboxylic acid transport|tricarboxylic acid transmembrane transport
Soltu.DM.01G001000	832.728	957.924	707.531	0.738446	-0.437435	8.54e-05	0.000524466	Down	6.56924	6.45957	5.55929	8.58336	8.37407	8.37298	107061806	R1B-16	Putative late blight resistance protein homolog R1B-16	GO:0005737,GO:0016020,GO:0043531,GO:0005524,GO:0009626	cytoplasm|membrane|ADP binding|ATP binding|plant-type hypersensitive response
Soltu.DM.01G001010	175.763	154.249	197.277	1.27912	0.355149	0.105842	0.230938	Up	1.83542	1.5488	2.02971	1.17348	1.33276	1.75859		sal3	Importin subunit beta-3	GO:0005737,GO:0005829,GO:0005635,GO:0031965,GO:0034399,GO:0005643,GO:0005634,GO:0005525,GO:0061608,GO:0008139,GO:0006607,GO:0006606,GO:0010389,GO:0006610	cytoplasm|cytosol|nuclear envelope|nuclear membrane|nuclear periphery|nuclear pore|nucleus|GTP binding|nuclear import signal receptor activity|nuclear localization sequence binding|NLS-bearing protein import into nucleus|protein import into nucleus|regulation of G2/M transition of mitotic cell cycle|ribosomal protein import into nucleus
Soltu.DM.01G001020	799.701	870.682	728.721	0.836833	-0.256988	0.018999	0.0592269	Down	6.4897	5.6802	6.16549	7.16999	7.17804	7.70655		R1B-16	Putative late blight resistance protein homolog R1B-16	GO:0005737,GO:0016020,GO:0043531,GO:0005524,GO:0009626	cytoplasm|membrane|ADP binding|ATP binding|plant-type hypersensitive response
Soltu.DM.01G001030	75.7693	76.8961	74.6425	0.971349	-0.0419389	0.898334	0.94371	Down	0.462122	0.856207	0.733912	0.536169	0.787092	0.805249		sal3	Importin subunit beta-3	GO:0005737,GO:0005829,GO:0005635,GO:0031965,GO:0034399,GO:0005643,GO:0005634,GO:0005525,GO:0061608,GO:0008139,GO:0006607,GO:0006606,GO:0010389,GO:0006610	cytoplasm|cytosol|nuclear envelope|nuclear membrane|nuclear periphery|nuclear pore|nucleus|GTP binding|nuclear import signal receptor activity|nuclear localization sequence binding|NLS-bearing protein import into nucleus|protein import into nucleus|regulation of G2/M transition of mitotic cell cycle|ribosomal protein import into nucleus
Soltu.DM.01G001040	1040.66	1143.33	937.992	0.820349	-0.285691	0.00303102	0.0125569	Down	7.12367	6.85873	6.76433	8.62601	8.31626	8.51221		R1B-16	Putative late blight resistance protein homolog R1B-16	GO:0005737,GO:0016020,GO:0043531,GO:0005524,GO:0009626	cytoplasm|membrane|ADP binding|ATP binding|plant-type hypersensitive response
Soltu.DM.01G001050	89.9239	97.427	82.4208	0.845658	-0.241854	0.418877	0.60107	Down	1.03478	0.585229	0.817999	1.0928	0.770564	1.03944	102600173	sal3	Importin subunit beta-3	GO:0005737,GO:0005829,GO:0005635,GO:0031965,GO:0034399,GO:0005643,GO:0005634,GO:0005525,GO:0061608,GO:0008139,GO:0006607,GO:0006606,GO:0010389,GO:0006610	cytoplasm|cytosol|nuclear envelope|nuclear membrane|nuclear periphery|nuclear pore|nucleus|GTP binding|nuclear import signal receptor activity|nuclear localization sequence binding|NLS-bearing protein import into nucleus|protein import into nucleus|regulation of G2/M transition of mitotic cell cycle|ribosomal protein import into nucleus	sot03013	Nucleocytoplasmic transport
Soltu.DM.01G001060	605.499	682.848	528.151	0.773209	-0.371069	0.00264884	0.0111934	Down	5.14032	4.60007	4.9176	5.79152	6.70365	6.57863	102593820	R1B-16	Putative late blight resistance protein homolog R1B-16	GO:0005737,GO:0016020,GO:0043531,GO:0005524,GO:0009626	cytoplasm|membrane|ADP binding|ATP binding|plant-type hypersensitive response
Soltu.DM.01G001070	37.1572	37.0847	37.2297	1.00413	0.00594344	0.988644	0.994576	Up	1.02438	0.739302	1.16263	0.887273	0.884749	1.16438	102600508	PSE1	Importin subunit beta-3	GO:0005737,GO:0031965,GO:0034399,GO:0005634,GO:0008139,GO:0008565,GO:0006406,GO:0006607,GO:0006606,GO:0007088,GO:0060188,GO:0006610	cytoplasm|nuclear membrane|nuclear periphery|nucleus|nuclear localization sequence binding|protein transporter activity|mRNA export from nucleus|NLS-bearing protein import into nucleus|protein import into nucleus|regulation of mitotic nuclear division|regulation of protein desumoylation|ribosomal protein import into nucleus	sot03013	Nucleocytoplasmic transport
Soltu.DM.01G001080	20.5237	15.0764	25.971	1.71966	0.78212	0.290717	0.471452	Up	0.728535	0.242414	0.0505968	0.242212	0.151815	0.203282	102599837					sot03013	Nucleocytoplasmic transport
Soltu.DM.01G001100	706.049	760.32	651.777	0.857054	-0.222542	0.0760638	0.179882	Down	7.83373	7.79873	6.16181	8.69417	8.29235	8.60636	102594587
Soltu.DM.01G001160	920.802	996.29	845.314	0.848532	-0.236959	0.0204353	0.0627706	Down	8.17377	8.29147	8.34304	9.44762	9.49598	10.4958		sal3	Importin subunit beta-3	GO:0005737,GO:0005829,GO:0005635,GO:0031965,GO:0034399,GO:0005643,GO:0005634,GO:0005525,GO:0061608,GO:0008139,GO:0006607,GO:0006606,GO:0010389,GO:0006610	cytoplasm|cytosol|nuclear envelope|nuclear membrane|nuclear periphery|nuclear pore|nucleus|GTP binding|nuclear import signal receptor activity|nuclear localization sequence binding|NLS-bearing protein import into nucleus|protein import into nucleus|regulation of G2/M transition of mitotic cell cycle|ribosomal protein import into nucleus
Soltu.DM.01G001170	56.3439	54.4577	58.2302	1.06757	0.094328	0.802977	0.88841	Up	6.19845	3.46754	5.15669	3.04761	5.81244	5.08632
Soltu.DM.01G001200	108.885	104.689	113.08	1.07921	0.109971	0.666795	0.79893	Up	2.44965	2.01366	1.74904	1.69149	1.97903	2.11997	102595457		BTB/POZ domain-containing protein At3g05675	GO:0016567	protein ubiquitination
Soltu.DM.01G001210	7.44107	3.35852	11.5236	3.43931	1.78212	0.0751017	0.178018	Up	0.248602	0.0979582	0.349624	0.0413257	0.0388534	0.124861	102595783	LOG8	Cytokinin riboside 5'-monophosphate phosphoribohydrolase LOG8	GO:0005829,GO:0005634,GO:0016799,GO:0042803,GO:0009691	cytosol|nucleus|hydrolase activity, hydrolyzing N-glycosyl compounds|protein homodimerization activity|cytokinin biosynthetic process
Soltu.DM.01G001220	1338.85	1053.39	1624.32	1.54197	0.624774	1.82e-07	1.83e-06	Up	17.2577	15.8192	21.4838	11.7548	12.618	11.2252	102596121
Soltu.DM.01G001230	277.382	279.648	275.116	0.983338	-0.02424	0.883519	0.93532	Down	6.23679	5.06706	5.88765	5.64338	6.14986	5.79124	102596455
Soltu.DM.01G001240	5.23395	1.35946	9.10843	6.73337	2.75133	0.0658547	0.160718	Up	0.262508	0	0.0861424	0.0392736	0	0.0131845		HCR9-0	Receptor-like protein Cf-9 homolog	GO:0016021,GO:0005886	integral component of membrane|plasma membrane
Soltu.DM.01G001260	10.1203	1.0029	19.2376	19.1665	4.26051	0.000524744	0.0026977	Up	0.569567	0.144511	0.0651233	0.0277113	0.0130268	0		HCR9-0	Receptor-like protein Cf-9 homolog	GO:0016021,GO:0005886	integral component of membrane|plasma membrane
Soltu.DM.01G001280	886.919	497.05	1276.79	2.56712	1.36015	2.39e-26	1.2e-24	Up	30.484	29.275	28.1383	10.3154	13.706	10.3889		HCR9-0	Receptor-like protein Cf-9 homolog	GO:0016021,GO:0005886	integral component of membrane|plasma membrane
Soltu.DM.01G001320	10.8525	4.68795	17.0171	3.63863	1.8634	0.0207365	0.0635848	Up	0.289959	0.523493	0.494288	0.184039	0.0988734	0.0794358	102597328	HCR9-0	Receptor-like protein Cf-9 homolog	GO:0016021,GO:0005886	integral component of membrane|plasma membrane
Soltu.DM.01G001330	1553.91	1456.97	1650.85	1.13316	0.180347	0.065114	0.159321	Up	10.3785	10.8916	11.9433	9.05753	9.99102	10.4599	102600172	IQM2	IQ domain-containing protein IQM2	GO:0005737,GO:0005634	cytoplasm|nucleus
Soltu.DM.01G001340	3824.21	4166.06	3482.37	0.835873	-0.258645	0.000858507	0.00418192	Down	68.5347	64.2648	69.8903	77.1967	81.377	85.5277	102600507	mak16	Protein mak16	GO:0005829,GO:0005730,GO:0005634,GO:0030687,GO:0007049,GO:0042254	cytosol|nucleolus|nucleus|preribosome, large subunit precursor|cell cycle|ribosome biogenesis
Soltu.DM.01G001350	5097.85	4880.41	5315.3	1.08907	0.1231	0.108288	0.234933	Up	128.477	122.413	114.423	110.484	108.517	118.707	102600835	SCL30A	Serine/arginine-rich SC35-like splicing factor SCL30A	GO:0005829,GO:0016607,GO:0005681,GO:0003729,GO:0003723,GO:0000395,GO:0045292,GO:0000398,GO:0000381,GO:0008380	cytosol|nuclear speck|spliceosomal complex|mRNA binding|RNA binding|mRNA 5'-splice site recognition|mRNA cis splicing, via spliceosome|mRNA splicing, via spliceosome|regulation of alternative mRNA splicing, via spliceosome|RNA splicing	sot03040	Spliceosome
Soltu.DM.01G001360	1746.35	1959.91	1532.8	0.782117	-0.354544	0.000683665	0.00341445	Down	13.1752	13.6285	14.1125	19.5971	17.7121	15.3222	102601178		Glucan endo-1,3-beta-glucosidase 4	GO:0031225,GO:0046658,GO:0005886,GO:0042973,GO:0005975,GO:0006952	anchored component of membrane|anchored component of plasma membrane|plasma membrane|glucan endo-1,3-beta-D-glucosidase activity|carbohydrate metabolic process|defense response	sot00500	Starch and sucrose metabolism
Soltu.DM.01G001370	254.752	262.551	246.954	0.941024	-0.0876971	0.621251	0.76561	Down	7.66384	6.91541	8.41293	8.94969	7.00691	8.66064	102601850	COP10	Constitutive photomorphogenesis protein 10	GO:0005634,GO:0061631,GO:0004842,GO:0009585,GO:0010099	nucleus|ubiquitin conjugating enzyme activity|ubiquitin-protein transferase activity|red, far-red light phototransduction|regulation of photomorphogenesis	sot04120	Ubiquitin mediated proteolysis
Soltu.DM.01G001380	60.6475	61.1814	60.1136	0.982419	-0.0255897	0.939661	0.966075	Down	0.826768	0.9505	1.06394	0.711431	1.14012	1.05847
Soltu.DM.01G001390	13.9966	12.9915	15.0018	1.15656	0.209845	0.763931	0.863599	Up	0.143908	0.238161	0.404774	0.287066	0.253024	0.144556	102602184
Soltu.DM.01G001400	88.3849	91.189	85.5808	0.939335	-0.090288	0.775432	0.871567	Down	1.55224	1.38284	2.67868	1.75014	1.83529	2.44054
Soltu.DM.01G001410	3.00488	1.64653	4.36322	2.63034	1.39525	0.350067	0.535381	Up	0.126248	0.0596955	0.0147958	0.0157399	0.0443947	0.015852	102602519
Soltu.DM.01G001450	231.34	155.993	306.687	1.96655	0.975665	8.71e-08	9.16e-07	Up	3.68788	3.19027	3.9338	1.80898	1.70076	2.02836	102602748		Probable polyamine transporter At3g13620	GO:0016021,GO:0005886,GO:0015203,GO:0015293,GO:0015846	integral component of membrane|plasma membrane|polyamine transmembrane transporter activity|symporter activity|polyamine transport
Soltu.DM.01G001460	365.331	299.088	431.575	1.44307	0.529139	0.00018878	0.00107805	Up	9.39072	9.04785	9.36385	6.78778	6.25738	6.34786	102603084
Soltu.DM.01G001470	441.171	270.549	611.792	2.25964	1.17609	4.95e-12	8.81e-11	Up	9.38673	9.89687	10.7758	3.8155	5.72062	3.82577	102603417		Probable polyamine transporter At3g13620	GO:0016021,GO:0005886,GO:0015203,GO:0015293,GO:0015846	integral component of membrane|plasma membrane|polyamine transmembrane transporter activity|symporter activity|polyamine transport
Soltu.DM.01G001480	53.9173	44.3811	63.4536	1.43029	0.516312	0.13352	0.27418	Up	1.15817	1.17212	1.42877	0.993022	0.876455	0.775588	102603751
Soltu.DM.01G001500	1126.94	1048.34	1205.53	1.14999	0.201626	0.0354174	0.0982637	Up	18.8192	17.8423	19.3939	16.7977	15.9274	16.3407	102604088		Serine/threonine-protein phosphatase PP2A catalytic subunit	GO:0005737,GO:0046872,GO:0004721	cytoplasm|metal ion binding|phosphoprotein phosphatase activity	sot03015,sot04136	mRNA surveillance pathway|Autophagy - other
Soltu.DM.01G001520	1216.67	1181.11	1252.22	1.06034	0.0845254	0.467528	0.643092	Up	10.8863	13.8677	13.2414	10.7852	12.6384	12.6498	102604430	RH52	DEAD-box ATP-dependent RNA helicase 52	GO:0005524,GO:0004386,GO:0003729	ATP binding|helicase activity|mRNA binding
Soltu.DM.01G001530	365.183	348.408	381.959	1.09624	0.132567	0.371509	0.556519	Up	4.21601	4.49601	3.77411	3.6123	3.72214	4.13363	102604982		F-box/kelch-repeat protein At1g55270
Soltu.DM.01G001540	202.373	144.649	260.098	1.79904	0.847228	0.000261114	0.00144532	Up	7.71869	5.4746	8.32769	3.73607	3.11341	5.21647	102605321
Soltu.DM.01G001550	37.3227	44.7334	29.912	0.670248	-0.577233	0.255441	0.430919	Down	0.356038	1.0101	1.45664	1.90468	1.39617	0.942873	102605660	LTPG14	Non-specific lipid transfer protein GPI-anchored 14
Soltu.DM.01G001560	265.431	295.13	235.731	0.798736	-0.324209	0.0475997	0.124612	Down	2.86111	2.76557	3.0742	3.42186	3.71574	3.82775	102605992	GPI18	GPI mannosyltransferase 2	GO:0005789,GO:0016021,GO:0031501,GO:0004584,GO:0000030,GO:0006506	endoplasmic reticulum membrane|integral component of membrane|mannosyltransferase complex|dolichyl-phosphate-mannose-glycolipid alpha-mannosyltransferase activity|mannosyltransferase activity|GPI anchor biosynthetic process	sot00563	Glycosylphosphatidylinositol (GPI)-anchor biosynthesis
Soltu.DM.01G001570	1243.21	1365.91	1120.51	0.820448	-0.285517	0.00530392	0.0203509	Down	10.0301	10.1483	10.3592	11.794	11.6319	14.0659		SF1	Splicing factor-like protein 1	GO:0005634,GO:0005681,GO:0003723,GO:0008270,GO:0009738,GO:0006397,GO:0009737,GO:0008380	nucleus|spliceosomal complex|RNA binding|zinc ion binding|abscisic acid-activated signaling pathway|mRNA processing|response to abscisic acid|RNA splicing
Soltu.DM.01G001580	784.446	888.164	680.728	0.766455	-0.383727	0.00257546	0.0109201	Down	19.22	15.5323	18.5999	23.4329	20.569	26.1111	102578801
Soltu.DM.01G001590	1046.52	1180.73	912.307	0.772523	-0.37235	0.000406679	0.00215121	Down	9.47628	8.91472	7.97394	11.3202	10.9868	12.048	102579128	HUB2	E3 ubiquitin-protein ligase BRE1-like 2	GO:0005634,GO:0046872,GO:0042803,GO:0004842,GO:0033523,GO:0010390,GO:0045087,GO:0009965,GO:0010162,GO:0010228	nucleus|metal ion binding|protein homodimerization activity|ubiquitin-protein transferase activity|histone H2B ubiquitination|histone monoubiquitination|innate immune response|leaf morphogenesis|seed dormancy process|vegetative to reproductive phase transition of meristem
Soltu.DM.01G001600	50.9788	68.5653	33.3923	0.485747	-1.04172	0.0160024	0.0514525	Down	0.978161	0.479647	0.305699	1.53568	1.05313	1.05535	102579654
Soltu.DM.01G001620	268.557	260.196	276.918	1.06409	0.089625	0.638695	0.778332	Up	6.10736	6.90422	5.87968	6.81494	6.49501	4.5365	102580308	EBP2	Probable rRNA-processing protein EBP2 homolog	GO:0034399,GO:0005730,GO:0030687,GO:0003924,GO:0003723,GO:0042273,GO:0006364	nuclear periphery|nucleolus|preribosome, large subunit precursor|GTPase activity|RNA binding|ribosomal large subunit biogenesis|rRNA processing
Soltu.DM.01G001630	698.502	769.138	627.865	0.816468	-0.292532	0.0253546	0.0749077	Down	7.04842	6.698	7.16536	10.1292	7.70213	7.95226	102580641	CMT1	DNA (cytosine-5)-methyltransferase CMT1	GO:0005634,GO:0003682,GO:0003886,GO:0003677,GO:0010424,GO:0010216	nucleus|chromatin binding|DNA (cytosine-5-)-methyltransferase activity|DNA binding|DNA methylation on cytosine within a CG sequence|maintenance of DNA methylation	sot00270	Cysteine and methionine metabolism
Soltu.DM.01G001640	1632.3	1493.85	1770.74	1.18552	0.245519	0.0142702	0.046828	Up	28.9718	31.0903	31.1383	28.9139	24.6993	23.8141	102580983	TAP46	PP2A regulatory subunit TAP46	GO:0005737,GO:0005634,GO:0009966,GO:0031929	cytoplasm|nucleus|regulation of signal transduction|TOR signaling	sot04136	Autophagy - other
Soltu.DM.01G001650	8249.18	7663.56	8834.79	1.15284	0.205196	0.00149233	0.00679348	Up	89.275	91.9619	89.8999	79.3307	77.8817	79.5261	102581327	HD16	Casein kinase 1-like protein HD16	GO:0005737,GO:0005634,GO:0005524,GO:0004674,GO:0006897,GO:0009908,GO:0009740,GO:0010476,GO:0018105,GO:0018107,GO:0040008,GO:0048586	cytoplasm|nucleus|ATP binding|protein serine/threonine kinase activity|endocytosis|flower development|gibberellic acid mediated signaling pathway|gibberellin mediated signaling pathway|peptidyl-serine phosphorylation|peptidyl-threonine phosphorylation|regulation of growth|regulation of long-day photoperiodism, flowering
Soltu.DM.01G001660	400.674	393.866	407.481	1.03473	0.0492516	0.76696	0.865749	Up	10.0272	7.55577	9.6159	10.1152	7.29895	9.06052	102581658	PSA2	Protein PHOTOSYSTEM I ASSEMBLY 2, chloroplastic	GO:0009543,GO:0009535,GO:0031977,GO:0046872,GO:0009561,GO:0048564,GO:0010027	chloroplast thylakoid lumen|chloroplast thylakoid membrane|thylakoid lumen|metal ion binding|megagametogenesis|photosystem I assembly|thylakoid membrane organization
Soltu.DM.01G001670	20.3766	12.6566	28.0966	2.22134	1.15143	0.0722854	0.17255	Up	0.262615	0.40905	0.593827	0.292746	0.217289	0.06207	102581989	CDT1A	CDT1-like protein a, chloroplastic	GO:0009507,GO:0005634,GO:0004693,GO:0003677,GO:0070182,GO:0019901,GO:0051315,GO:0009658,GO:0051276,GO:0006260,GO:0000076,GO:0071163,GO:0048229,GO:0000278,GO:0000281	chloroplast|nucleus|cyclin-dependent protein serine/threonine kinase activity|DNA binding|DNA polymerase binding|protein kinase binding|attachment of mitotic spindle microtubules to kinetochore|chloroplast organization|chromosome organization|DNA replication|DNA replication checkpoint|DNA replication preinitiation complex assembly|gametophyte development|mitotic cell cycle|mitotic cytokinesis
Soltu.DM.01G001680	2016.97	2122.86	1911.08	0.900217	-0.151655	0.125454	0.262836	Down	27.2502	31.6062	25.2095	29.9934	31.9768	32.0259	102582321	MTP4	Metal tolerance protein 4	GO:0016021,GO:0005774,GO:0008324	integral component of membrane|vacuolar membrane|cation transmembrane transporter activity
Soltu.DM.01G001690	11527.7	11572.1	11483.3	0.992271	-0.0111935	0.891033	0.939422	Down	603.561	511.304	502.343	535.406	551.117	553.827	102577551	RPP1C	60S acidic ribosomal protein P1-3	GO:0005829,GO:0022625,GO:0022626,GO:0005634,GO:0005886,GO:0030295,GO:0043021,GO:0003735,GO:0002181,GO:0006414	cytosol|cytosolic large ribosomal subunit|cytosolic ribosome|nucleus|plasma membrane|protein kinase activator activity|ribonucleoprotein complex binding|structural constituent of ribosome|cytoplasmic translation|translational elongation	sot03010	Ribosome
Soltu.DM.01G001700	169.742	180.287	159.197	0.882703	-0.18	0.377019	0.561398	Down	12.7692	13.9217	11.057	13.3849	15.1773	14.4607
Soltu.DM.01G001710	25.4826	27.6855	23.2798	0.83928	-0.252776	0.647755	0.785303	Down	1.57777	1.35219	0.416047	1.2786	1.34081	1.38677	102578234
Soltu.DM.01G001720	570.308	611.461	529.156	0.865674	-0.208104	0.0892276	0.203597	Down	9.47595	10.7006	10.665	12.4222	11.6416	11.8079	102583550	EBP2	Probable rRNA-processing protein EBP2 homolog	GO:0034399,GO:0005730,GO:0030687,GO:0003924,GO:0003723,GO:0042273,GO:0006364	nuclear periphery|nucleolus|preribosome, large subunit precursor|GTPase activity|RNA binding|ribosomal large subunit biogenesis|rRNA processing
Soltu.DM.01G001730	382.898	378.191	387.605	1.02484	0.0354037	0.813711	0.894912	Up	4.28881	4.80992	4.55345	3.84385	4.73544	4.82995	102583878	BPG2	GTP-binding protein BRASSINAZOLE INSENSITIVE PALE GREEN 2, chloroplastic	GO:0009507,GO:0009570,GO:0005525,GO:0016787,GO:0019843,GO:0009742,GO:0009658,GO:1901259,GO:0032502,GO:1904143,GO:1902326,GO:0006355,GO:0009646,GO:0009741,GO:0009416,GO:0009651	chloroplast|chloroplast stroma|GTP binding|hydrolase activity|rRNA binding|brassinosteroid mediated signaling pathway|chloroplast organization|chloroplast rRNA processing|developmental process|positive regulation of carotenoid biosynthetic process|positive regulation of chlorophyll biosynthetic process|regulation of transcription, DNA-templated|response to absence of light|response to brassinoste…
Soltu.DM.01G001740	1074.76	754.175	1395.34	1.85065	0.88803	2.25e-18	6.86e-17	Up	39.9423	42.4326	42.9059	24.3268	21.2254	22.6132	102584192	SINAT2	E3 ubiquitin-protein ligase SINAT2	GO:0005737,GO:0005634,GO:0061630,GO:0008270,GO:0007275,GO:0016567,GO:2000785,GO:0006511	cytoplasm|nucleus|ubiquitin protein ligase activity|zinc ion binding|multicellular organism development|protein ubiquitination|regulation of autophagosome assembly|ubiquitin-dependent protein catabolic process	sot04120	Ubiquitin mediated proteolysis
Soltu.DM.01G001750	112.493	70.6268	154.359	2.18487	1.12755	5.51e-06	4.26e-05	Up	15.5915	18.2751	15.5447	6.6803	8.13395	7.94114
Soltu.DM.01G001760	44.3801	51.4162	37.344	0.726467	-0.461031	0.278355	0.458147	Down	0.566598	0.927387	0.878568	0.630327	1.43046	1.22586	102585398	rpoC1	DNA-directed RNA polymerase subunit beta'	GO:0009507,GO:0003677,GO:0003899,GO:0006351	chloroplast|DNA binding|DNA-directed 5'-3' RNA polymerase activity|transcription, DNA-templated
Soltu.DM.01G001770	70.4403	76.047	64.8336	0.8517	-0.231583	0.455436	0.632502	Down	1.14313	1.00897	0.728804	1.09455	1.14341	1.16359		ASHH3	Histone-lysine N-methyltransferase ASHH3	GO:0000775,GO:0005783,GO:0005634,GO:0009506,GO:0018024,GO:0016279	chromosome, centromeric region|endoplasmic reticulum|nucleus|plasmodesma|histone-lysine N-methyltransferase activity|protein-lysine N-methyltransferase activity
Soltu.DM.01G001790	1635.16	1416.83	1853.49	1.30824	0.387631	6.36e-06	4.87e-05	Up	20.9756	21.7702	20.4002	16.3638	15.7354	16.4921	102586842	ATG4	Cysteine protease ATG4	GO:0005737,GO:0008234,GO:0006914,GO:0015031	cytoplasm|cysteine-type peptidase activity|autophagy|protein transport	sot04136	Autophagy - other
Soltu.DM.01G001810	39.976	38.2618	41.6902	1.08989	0.124177	0.789549	0.880681	Up	2.8384	1.18726	2.61004	2.99433	1.38201	1.75457		FBL13	F-box/LRR-repeat protein 13
Soltu.DM.01G001820	121.291	141.483	101.098	0.714846	-0.484295	0.0463852	0.122054	Down	2.44955	3.23166	3.2323	3.80047	4.67907	4.07058	102587401	EMB1687	Probable ribonuclease P/MRP protein subunit POP5	GO:0005655,GO:0000172,GO:0005773,GO:0004526,GO:0006364,GO:0008033	nucleolar ribonuclease P complex|ribonuclease MRP complex|vacuole|ribonuclease P activity|rRNA processing|tRNA processing	sot03008	Ribosome biogenesis in eukaryotes
Soltu.DM.01G001830	5079.66	4438.4	5720.91	1.28892	0.366162	6e-07	5.46e-06	Up	61.9392	63.5014	65.0988	47.4443	51.7617	49.5611	102587729	THFS	Formate--tetrahydrofolate ligase	GO:0048046,GO:0009507,GO:0005737,GO:0005829,GO:0005886,GO:0005524,GO:0005507,GO:0004329,GO:0004477,GO:0004488,GO:0009257,GO:0009113,GO:0046686,GO:0009735,GO:0035999	apoplast|chloroplast|cytoplasm|cytosol|plasma membrane|ATP binding|copper ion binding|formate-tetrahydrofolate ligase activity|methenyltetrahydrofolate cyclohydrolase activity|methylenetetrahydrofolate dehydrogenase (NADP+) activity|10-formyltetrahydrofolate biosynthetic process|purine nucleobase biosynthetic process|response to cadmium ion|response to cytokinin|tetrahydrofolate interconversion	sot00670	One carbon pool by folate
Soltu.DM.01G001840	889.75	755.816	1023.68	1.35428	0.437521	0.0118051	0.0399935	Up	41.0518	35.779	60.3844	28.4734	41.0387	32.3705	102588050		Lignin-forming anionic peroxidase	GO:0005576,GO:0020037,GO:0046872,GO:0004601,GO:0042744,GO:0006979	extracellular region|heme binding|metal ion binding|peroxidase activity|hydrogen peroxide catabolic process|response to oxidative stress	sot00940	Phenylpropanoid biosynthesis
Soltu.DM.01G001850	19.1754	11.2483	27.1025	2.40237	1.26446	0.0423877	0.11352	Up	0.703483	0.536512	0.553186	0.0905354	0.361756	0.296337	102588377		Lignin-forming anionic peroxidase	GO:0005576,GO:0020037,GO:0046872,GO:0004601,GO:0042744,GO:0006979	extracellular region|heme binding|metal ion binding|peroxidase activity|hydrogen peroxide catabolic process|response to oxidative stress	sot00940	Phenylpropanoid biosynthesis
Soltu.DM.01G001870	135.743	72.1875	199.298	2.7582	1.46373	3.18e-10	4.64e-09	Up	3.57308	3.65769	3.4709	1.08383	1.50257	1.31356	102604538	HRPN	Peroxidase N	GO:0005576,GO:0020037,GO:0046872,GO:0004601,GO:0042744,GO:0006979	extracellular region|heme binding|metal ion binding|peroxidase activity|hydrogen peroxide catabolic process|response to oxidative stress	sot00940	Phenylpropanoid biosynthesis
Soltu.DM.01G001880	315.151	186.665	443.636	2.37722	1.24927	1.07e-15	2.69e-14	Up	13.2744	14.3552	12.7679	5.91898	5.38914	5.80429	102589039	NDR1	Protein NDR1	GO:0046658,GO:0016020,GO:0005886,GO:0009506,GO:0042742,GO:0009816,GO:0009817,GO:0009814,GO:0009626,GO:0010942	anchored component of plasma membrane|membrane|plasma membrane|plasmodesma|defense response to bacterium|defense response to bacterium, incompatible interaction|defense response to fungus, incompatible interaction|defense response, incompatible interaction|plant-type hypersensitive response|positive regulation of cell death
Soltu.DM.01G001890	17.5624	4.97233	30.1525	6.04927	2.59676	0.000134017	0.00079207	Up	0.414022	0.764425	0.554538	0.0589918	0.129413	0.0990205	102589359	PAP12	Probable plastid-lipid-associated protein 12, chloroplastic	GO:0009507,GO:0009941,GO:0009534,GO:0009535,GO:0016020	chloroplast|chloroplast envelope|chloroplast thylakoid|chloroplast thylakoid membrane|membrane
Soltu.DM.01G001900	317.689	306.44	328.938	1.07395	0.10292	0.512509	0.681575	Up	2.69265	3.07541	3.3246	2.9977	2.74723	2.78097	102589682	RH41	DEAD-box ATP-dependent RNA helicase 41	GO:0005524,GO:0004386,GO:0046872,GO:0003723	ATP binding|helicase activity|metal ion binding|RNA binding
Soltu.DM.01G001910	4491.36	4758.72	4224	0.887628	-0.171972	0.0127502	0.0426324	Down	19.128	18.8805	19.2504	21.2901	21.5555	22.0864	102590221	CALS9	Callose synthase 9	GO:0000148,GO:0005794,GO:0016021,GO:0005886,GO:0003843,GO:0006075,GO:0052543,GO:0048589,GO:0055047,GO:0009556,GO:0009555,GO:0009846,GO:0008360,GO:0080092	1,3-beta-D-glucan synthase complex|Golgi apparatus|integral component of membrane|plasma membrane|1,3-beta-D-glucan synthase activity|(1->3)-beta-D-glucan biosynthetic process|callose deposition in cell wall|developmental growth|generative cell mitosis|microsporogenesis|pollen development|pollen germination|regulation of cell shape|regulation of pollen tube growth
Soltu.DM.01G001920	1212	1174.25	1249.76	1.06432	0.0899286	0.409088	0.592256	Up	5.24161	5.46255	5.94698	4.59895	5.47227	5.67834	102590545	CALS3	Callose synthase 3	GO:0000148,GO:0016021,GO:0005886,GO:0003843,GO:0006075,GO:0071555,GO:0008360	1,3-beta-D-glucan synthase complex|integral component of membrane|plasma membrane|1,3-beta-D-glucan synthase activity|(1->3)-beta-D-glucan biosynthetic process|cell wall organization|regulation of cell shape
Soltu.DM.01G001930	267.074	279.553	254.594	0.910522	-0.135234	0.434131	0.614388	Down	1.84739	1.94671	1.80276	1.72976	2.18487	2.27229	102591146	LIN	Putative E3 ubiquitin-protein ligase LIN	GO:0004842,GO:0009877	ubiquitin-protein transferase activity|nodulation
Soltu.DM.01G001940	2.2831	0.322492	4.24371	11.8438	3.56606	0.0678645	0.164559	Up	0.0651033	0.215486	0.122078	0	0.0305245	0	102591817
Soltu.DM.01G001950	5081.93	4686.29	5477.58	1.16886	0.2251	0.494174	0.667232	Up	144.733	110.675	227.098	116.605	143.51	155.459
Soltu.DM.01G001960	1.13731	0	2.27461	12.3683	3.62857	0.16272	0.316429	Up	0.035071	0.0331662	0.164408	0	0	0
Soltu.DM.01G001970	3605.71	3340.75	3870.66	1.15863	0.21242	0.621917	0.766172	Up	83.8956	89.8072	191.608	83.0635	123.379	110.771	102591817
Soltu.DM.01G001980	29.0768	4.37509	53.7785	12.3522	3.62669	6.65e-09	8.23e-08	Up	2.05176	1.47197	2.02318	0.070566	0.0663444	0.31981	102592144
Soltu.DM.01G001990	8531.1	7765.1	9297.09	1.19732	0.259803	0.00535694	0.020532	Up	106.922	122.174	128.485	88.3938	103.505	108.769	102593159	FAD12	Delta(12)-acyl-lipid-desaturase	GO:0016021,GO:0016717,GO:0006636	integral component of membrane|oxidoreductase activity, acting on paired donors, with oxidation of a pair of donors resulting in the reduction of molecular oxygen to two molecules of water|unsaturated fatty acid biosynthetic process	sot01040	Biosynthesis of unsaturated fatty acids
Soltu.DM.01G002010	216.702	216.901	216.502	0.998375	-0.00234694	0.990018	0.995241	Down	3.52817	3.87469	4.57062	3.97303	4.32233	3.7727	102593496	MOD1	Enoyl-[acyl-carrier-protein] reductase [NADH], chloroplastic	GO:0009507,GO:0009941,GO:0009570,GO:0005835,GO:0009579,GO:0005507,GO:0004318,GO:0016631,GO:0006633	chloroplast|chloroplast envelope|chloroplast stroma|fatty acid synthase complex|thylakoid|copper ion binding|enoyl-[acyl-carrier-protein] reductase (NADH) activity|enoyl-[acyl-carrier-protein] reductase activity|fatty acid biosynthetic process	sot00061,sot00780	Fatty acid biosynthesis|Biotin metabolism
Soltu.DM.01G002020	2.63324	3.96809	1.2984	0.328214	-1.60729	0.397793	0.582462	Down	0	0.0878674	0	0	0.130691	0.139998	102605541	NSE4A	Non-structural maintenance of chromosomes element 4 homolog A	GO:0005634,GO:0030915,GO:0006310,GO:0006281,GO:2001022	nucleus|Smc5-Smc6 complex|DNA recombination|DNA repair|positive regulation of response to DNA damage stimulus
Soltu.DM.01G002050	180.931	166.713	195.15	1.17014	0.226682	0.263353	0.440534	Up	3.9467	4.4166	4.11147	3.01792	4.07101	3.6341	102593821
Soltu.DM.01G002060	401.903	393.208	410.599	1.04447	0.0627718	0.677103	0.806078	Up	5.21754	4.69129	6.27321	5.32528	5.03205	5.24103	102594135		Protein adenylyltransferase SelO, mitochondrial
Soltu.DM.01G002070	461.459	506.359	416.558	0.822752	-0.28147	0.0280583	0.0813142	Down	4.78588	4.84276	4.90218	6.14577	5.74444	5.8891	102594466		Pentatricopeptide repeat-containing protein At5g48730, chloroplastic
Soltu.DM.01G002080	2627.46	2641.45	2613.48	0.989422	-0.0153421	0.849377	0.915502	Down	42.7804	39.3626	43.8139	43.0646	41.4648	43.6206	102595131	SDH	Sorbitol dehydrogenase	GO:0005737,GO:0005829,GO:0031966,GO:0005886,GO:0009506,GO:0003939,GO:0008270	cytoplasm|cytosol|mitochondrial membrane|plasma membrane|plasmodesma|L-iditol 2-dehydrogenase activity|zinc ion binding	sot00040,sot00051	Pentose and glucuronate interconversions|Fructose and mannose metabolism
Soltu.DM.01G002090	1101.32	1043.93	1158.72	1.10993	0.150472	0.186691	0.348074	Up	14.6892	15.9208	16.1607	12.0687	14.9818	15.3673	102594793	RLK1	G-type lectin S-receptor-like serine/threonine-protein kinase RLK1
Soltu.DM.01G002100	7.75355	5.06088	10.4462	2.07375	1.05224	0.261767	0.438742	Up	0.295832	0.466274	0.739639	0.393415	0.0924697	0.247637		RLK1	G-type lectin S-receptor-like serine/threonine-protein kinase RLK1
Soltu.DM.01G002110	101.393	90.6524	112.133	1.23704	0.306887	0.276027	0.455561	Up	1.73849	2.64781	1.59565	1.40542	1.69886	1.7647	102595458	LECRK2	G-type lectin S-receptor-like serine/threonine-protein kinase LECRK2	GO:0016021,GO:0005886,GO:0005524,GO:0030246,GO:0004674,GO:0006952,GO:0006468	integral component of membrane|plasma membrane|ATP binding|carbohydrate binding|protein serine/threonine kinase activity|defense response|protein phosphorylation
Soltu.DM.01G002140	5.31518	8.37725	2.2531	0.271118	-1.88301	0.143903	0.289705	Down	0	0.00942642	0.0560734	0.0298255	0.0560823	0.160203	102596122	LOX2.1	Linoleate 13S-lipoxygenase 2-1, chloroplastic	GO:0009570,GO:0009534,GO:0016165,GO:0046872,GO:0010597,GO:0031408	chloroplast stroma|chloroplast thylakoid|linoleate 13S-lipoxygenase activity|metal ion binding|green leaf volatile biosynthetic process|oxylipin biosynthetic process	sot00591,sot00592	Linoleic acid metabolism|alpha-Linolenic acid metabolism
Soltu.DM.01G002150	5.4135	4.26324	6.56376	1.53499	0.618234	0.616479	0.76241	Up	0.0588008	0.0185357	0.11026	0.0390984	0.0827085	0		LOX2.1	Linoleate 13S-lipoxygenase 2-1, chloroplastic	GO:0009570,GO:0009534,GO:0016165,GO:0046872,GO:0010597,GO:0031408	chloroplast stroma|chloroplast thylakoid|linoleate 13S-lipoxygenase activity|metal ion binding|green leaf volatile biosynthetic process|oxylipin biosynthetic process
Soltu.DM.01G002170	5.34309	2.68619	7.99999	2.97931	1.57498	0.211851	0.379028	Up	0.396497	0.0576865	0.257362	0.182522	0.0572008	0		AOP1.2	Probable 2-oxoglutarate-dependent dioxygenase AOP1.2	GO:0051213,GO:0046872	dioxygenase activity|metal ion binding
Soltu.DM.01G002180	577.079	358.095	796.064	2.22366	1.15294	6.38e-11	1.02e-09	Up	18.7464	13.6336	22.8401	7.92509	7.18328	9.91723		AOP1.2	Probable 2-oxoglutarate-dependent dioxygenase AOP1.2	GO:0051213,GO:0046872	dioxygenase activity|metal ion binding
Soltu.DM.01G002190	48.7704	69.6646	27.8763	0.400594	-1.31979	0.00985468	0.034469	Down	0.305687	0.851193	0.222915	1.86322	0.939577	0.665304		AOP1.2	Probable 2-oxoglutarate-dependent dioxygenase AOP1.2	GO:0051213,GO:0046872	dioxygenase activity|metal ion binding
Soltu.DM.01G002210	39.7672	12.2375	67.2968	5.48037	2.45427	1.13e-06	9.82e-06	Up	1.80835	0.820863	2.10237	0.192388	0.429586	0.242199		AOP1.2	Probable 2-oxoglutarate-dependent dioxygenase AOP1.2	GO:0051213,GO:0046872	dioxygenase activity|metal ion binding
Soltu.DM.01G002220	631.299	666.146	596.451	0.895614	-0.159051	0.187863	0.349731	Down	16.762	17.09	16.7524	19.824	16.8643	20.2284		2-ODD	Deoxypodophyllotoxin synthase
Soltu.DM.01G002230	25.5333	22.0762	28.9904	1.31388	0.393829	0.449911	0.627441	Up	2.044	1.22422	2.49132	1.97071	1.2778	1.16348
Soltu.DM.01G002240	3754.73	2927.4	4582.06	1.56526	0.646401	0.0828893	0.192256	Up	71.3261	55.9639	104.573	43.2726	38.0313	68.0736		AOP1.2	Probable 2-oxoglutarate-dependent dioxygenase AOP1.2	GO:0051213,GO:0046872	dioxygenase activity|metal ion binding
Soltu.DM.01G002270	25.7127	11.2523	40.1731	3.5647	1.83378	0.00216188	0.00934847	Up	0.598583	0.5443	1.55414	0.160737	0.367008	0.231261	102589018	AOP1.2	Probable 2-oxoglutarate-dependent dioxygenase AOP1.2	GO:0051213,GO:0046872	dioxygenase activity|metal ion binding
Soltu.DM.01G002280	3.08152	4.53126	1.63178	0.359708	-1.4751	0.37519	0.560103	Down	0.0113963	0.0107774	0.0320547	0	0.138926	0.0114476	102589659	FTIP3	FT-interacting protein 3
Soltu.DM.01G002290	849.544	889.93	809.159	0.909147	-0.137415	0.208205	0.374523	Down	7.99925	8.42735	8.30591	9.01361	9.80157	8.5513	102589993		Uncharacterized protein YMR315W	GO:0016491,GO:0006740	oxidoreductase activity|NADPH regeneration
Soltu.DM.01G002310	189.15	184.862	193.438	1.04604	0.0649428	0.757405	0.859247	Up	2.4095	2.45734	1.79398	2.42678	2.12653	1.85085	102590311	EIL3	ETHYLENE INSENSITIVE 3-like 3 protein	GO:0005634,GO:0003677,GO:0003700,GO:0071281,GO:0009873,GO:0042762,GO:0006355	nucleus|DNA binding|DNA-binding transcription factor activity|cellular response to iron ion|ethylene-activated signaling pathway|regulation of sulfur metabolic process|regulation of transcription, DNA-templated	sot04016,sot04075	MAPK signaling pathway - plant|Plant hormone signal transduction
Soltu.DM.01G002320	4.28037	0	8.56073	46.484	5.53866	0.000853306	0.00416151	Up	0.103999	0.122938	0.097507	0	0	0		CRSP	CO(2)-response secreted protease	GO:0048046,GO:0005618,GO:0004252,GO:0008236,GO:1900425,GO:2000122,GO:0006508,GO:2000038,GO:0010037	apoplast|cell wall|serine-type endopeptidase activity|serine-type peptidase activity|negative regulation of defense response to bacterium|negative regulation of stomatal complex development|proteolysis|regulation of stomatal complex development|response to carbon dioxide
Soltu.DM.01G002330	10.6668	3.64829	17.6854	4.83899	2.2747	0.00775256	0.0281749	Up	0.115663	0.288369	0.138018	0.0209749	0.0493001	0.0422487	102582746	CRSP	CO(2)-response secreted protease	GO:0048046,GO:0005618,GO:0004252,GO:0008236,GO:1900425,GO:2000122,GO:0006508,GO:2000038,GO:0010037	apoplast|cell wall|serine-type endopeptidase activity|serine-type peptidase activity|negative regulation of defense response to bacterium|negative regulation of stomatal complex development|proteolysis|regulation of stomatal complex development|response to carbon dioxide
Soltu.DM.01G002340	31.2136	34.5604	27.8668	0.807849	-0.307842	0.530513	0.696378	Down	0.255202	0.252311	0.435038	0.578492	0.271942	0.326265	102583078	TDS4	Transcription factor IIIB 70 kDa subunit	GO:0000126,GO:0003677,GO:0046872,GO:0000994,GO:0000995,GO:0017025,GO:0001156,GO:0001112,GO:0090074,GO:0006355,GO:0070898,GO:0070893	transcription factor TFIIIB complex|DNA binding|metal ion binding|RNA polymerase III core binding|RNA polymerase III general transcription initiation factor activity|TBP-class protein binding|TFIIIC-class transcription factor complex binding|DNA-templated transcriptional open complex formation|negative regulation of protein homodimerization activity|regulation of transcription, DNA-templated|RNA …
Soltu.DM.01G002350	1375.58	1388.28	1362.89	0.981469	-0.0269858	0.786517	0.878705	Down	24.3142	20.7939	21.3843	21.3968	23.1138	23.6672	102590649	UGT92A1	UDP-glycosyltransferase 92A1	GO:0043231,GO:0016758,GO:0008194	intracellular membrane-bounded organelle|transferase activity, transferring hexosyl groups|UDP-glycosyltransferase activity
Soltu.DM.01G002360	362.975	365.759	360.192	0.984257	-0.0228924	0.876838	0.931513	Down	5.46815	4.82733	4.97681	4.8882	5.6322	5.08373	102591001	JMJ30	Lysine-specific demethylase JMJ30	GO:0005737,GO:0005634,GO:0051213,GO:0003700,GO:0046975,GO:0046872,GO:0007623,GO:0009908,GO:0070544,GO:0042752	cytoplasm|nucleus|dioxygenase activity|DNA-binding transcription factor activity|histone methyltransferase activity (H3-K36 specific)|metal ion binding|circadian rhythm|flower development|histone H3-K36 demethylation|regulation of circadian rhythm
Soltu.DM.01G002370	37.8495	43.365	32.334	0.747633	-0.419599	0.373369	0.558492	Down	0.250073	0.410747	0.579985	0.761391	0.320894	0.594945	102591344	IRKI	IRK-interacting protein
Soltu.DM.01G002380	592.916	615.371	570.461	0.927204	-0.109041	0.371386	0.556437	Down	6.66556	6.53068	6.77869	7.88199	6.66715	7.14194	102591670
Soltu.DM.01G002390	788.42	946.846	629.994	0.66531	-0.587901	2.84e-08	3.21e-07	Down	3.81655	3.63236	3.76723	5.76777	5.63458	5.56351	102592008		DExH-box ATP-dependent RNA helicase DExH3	GO:0005634,GO:0005524,GO:0034459,GO:0003723	nucleus|ATP binding|ATP-dependent 3'-5' RNA helicase activity|RNA binding	sot03018	RNA degradation
Soltu.DM.01G002400	41.4586	62.6075	20.3097	0.323369	-1.62874	0.000579862	0.00294791	Down	0.284791	0.232175	0.0644513	0.587686	0.663033	0.552416	102592336	ABCG22	ABC transporter G family member 22	GO:0016021,GO:0005886,GO:0005524,GO:0042626,GO:0009414,GO:0055085,GO:0010148	integral component of membrane|plasma membrane|ATP binding|ATPase activity, coupled to transmembrane movement of substances|response to water deprivation|transmembrane transport|transpiration	sot02010	ABC transporters
Soltu.DM.01G002410	26.8822	28.5602	25.2043	0.880454	-0.18368	0.717885	0.833605	Down	0.538638	0.324152	0.336675	0.488394	0.581623	0.295125	102592681	CPK20	Calcium-dependent protein kinase 20	GO:0005737,GO:0016020,GO:0005634,GO:0005524,GO:0005509,GO:0009931,GO:0004683,GO:0009738,GO:0035556,GO:0018105	cytoplasm|membrane|nucleus|ATP binding|calcium ion binding|calcium-dependent protein serine/threonine kinase activity|calmodulin-dependent protein kinase activity|abscisic acid-activated signaling pathway|intracellular signal transduction|peptidyl-serine phosphorylation	sot04626	Plant-pathogen interaction
Soltu.DM.01G002430	546	587.599	504.402	0.857962	-0.221014	0.0997859	0.221232	Down	6.85612	5.88543	6.24654	6.79962	8.28162	7.17232		SPP1	Sucrose-phosphatase 1	GO:0000287,GO:0050307,GO:0005986	magnesium ion binding|sucrose-phosphate phosphatase activity|sucrose biosynthetic process
Soltu.DM.01G002440	83.9603	85.0658	82.8548	0.972832	-0.0397372	0.891435	0.939701	Down	5.04459	4.87902	3.92348	4.34534	5.85929	4.08839	102577786	SPP1	Sucrose-phosphatase 1	GO:0000287,GO:0050307,GO:0005986	magnesium ion binding|sucrose-phosphate phosphatase activity|sucrose biosynthetic process	sot00500	Starch and sucrose metabolism
Soltu.DM.01G002470	977.033	851.678	1102.39	1.29458	0.37248	0.000657928	0.00330195	Up	19.6163	20.7618	18.3233	15.2113	13.8046	16.6591	102593675	NEN1	Protein NEN1	GO:0005737,GO:0005634,GO:0008408,GO:0046872,GO:0003676	cytoplasm|nucleus|3'-5' exonuclease activity|metal ion binding|nucleic acid binding
Soltu.DM.01G002480	147.589	154.59	140.588	0.909988	-0.136081	0.576381	0.732365	Down	6.30431	7.42425	10.6505	9.19453	9.70412	8.06522	102594000
Soltu.DM.01G002490	4127.88	4358.3	3897.45	0.894264	-0.161227	0.0311099	0.0884192	Down	58.0936	55.9679	57.756	62.2101	62.416	68.8202	102594334	MAP2B	Methionine aminopeptidase 2B	GO:0005737,GO:0046872,GO:0070006,GO:0070084,GO:0016485	cytoplasm|metal ion binding|metalloaminopeptidase activity|protein initiator methionine removal|protein processing
Soltu.DM.01G002500	792.65	748.717	836.583	1.1174	0.160144	0.194484	0.357769	Up	10.5197	10.48	11.6449	10.8394	10.0529	8.49669	102594875	RHF2A	E3 ubiquitin-protein ligase RHF2A	GO:0005886,GO:0046872,GO:0004842,GO:0009561,GO:0055046,GO:0051603,GO:0051726	plasma membrane|metal ion binding|ubiquitin-protein transferase activity|megagametogenesis|microgametogenesis|proteolysis involved in cellular protein catabolic process|regulation of cell cycle
Soltu.DM.01G002510	2305.14	2054.59	2555.69	1.24397	0.314955	0.0029068	0.0120971	Up	33.0932	35.3816	43.3061	30.0444	31.6513	28.7215	102595440	FLA17	Fasciclin-like arabinogalactan protein 17	GO:0005576,GO:0005773	extracellular region|vacuole
Soltu.DM.01G002520	3057.07	3115.23	2998.9	0.962717	-0.0548167	0.545545	0.707718	Down	38.9312	35.7202	37.9865	43.0956	35.0087	39.7017	102595763	WDL4	Protein WVD2-like 4	GO:0005737,GO:0005874	cytoplasm|microtubule
Soltu.DM.01G002540	120.014	130.189	109.839	0.843504	-0.245532	0.301228	0.482634	Down	0.962768	1.01616	0.773714	1.14031	1.05597	1.08799	102583734		Putative pentatricopeptide repeat-containing protein At5g06400, mitochondrial
Soltu.DM.01G002550	499.522	553.23	445.814	0.805916	-0.311299	0.0332782	0.093431	Down	8.29353	8.10985	8.04028	12.1547	9.47001	8.8976	102596654	HSCB	Iron-sulfur cluster co-chaperone protein HscB homolog
Soltu.DM.01G002560	1285.33	1280.86	1289.79	1.00698	0.010038	0.91919	0.954983	Up	12.3904	13.2293	11.9542	13.3348	12.4902	11.7235	102596987
Soltu.DM.01G002580	1860.35	1954.48	1766.23	0.903597	-0.146248	0.0824608	0.19156	Down	6.60407	6.27666	6.04364	7.10369	6.9096	7.06572	102597311	ATXR7	Histone-lysine N-methyltransferase ATXR7	GO:0005737,GO:0005634,GO:0042800,GO:0009908,GO:0010452,GO:0051568,GO:0009909,GO:0010228	cytoplasm|nucleus|histone methyltransferase activity (H3-K4 specific)|flower development|histone H3-K36 methylation|histone H3-K4 methylation|regulation of flower development|vegetative to reproductive phase transition of meristem
Soltu.DM.01G002590	512.668	346.599	678.738	1.9588	0.969969	3.59e-14	7.98e-13	Up	5.89584	6.53572	5.99936	3.30719	2.99579	3.17171	102598948
Soltu.DM.01G002610	8220.87	9005.31	7436.42	0.825783	-0.276166	3.59e-05	0.000238427	Down	262.504	251.558	260.589	324.29	305.627	314.327	102584076	NPC2	Phosphatidylglycerol/phosphatidylinositol transfer protein	GO:0005622,GO:0032366	intracellular|intracellular sterol transport
Soltu.DM.01G002640	37.076	32.7163	41.4356	1.26517	0.339326	0.428593	0.60958	Up	0.687262	0.549944	0.359354	0.474557	0.408986	0.385006	102584402	PCMP-E52	Pentatricopeptide repeat-containing protein At4g39530
Soltu.DM.01G002650	928.004	828.525	1027.48	1.2404	0.310808	0.00461248	0.0180485	Up	16.6065	18.1079	17.4303	15.5909	13.3523	13.3765	102599915	NFYA2	Nuclear transcription factor Y subunit A-2	GO:0016602,GO:0003677,GO:0003700,GO:0009567,GO:0006355	CCAAT-binding factor complex|DNA binding|DNA-binding transcription factor activity|double fertilization forming a zygote and endosperm|regulation of transcription, DNA-templated
Soltu.DM.01G002660	305.362	262.723	348	1.3245	0.405449	0.0221683	0.0671785	Up	7.00268	5.95815	7.99872	5.89247	5.53995	4.48197	102600250		33 kDa ribonucleoprotein, chloroplastic	GO:0009507,GO:0003723,GO:0006397	chloroplast|RNA binding|mRNA processing
Soltu.DM.01G002670	1797.57	1372.05	2223.1	1.62026	0.696221	1.75e-12	3.27e-11	Up	49.2982	44.1627	44.6228	26.7947	26.8699	32.1646	102600579	SYP121	Syntaxin-121	GO:0009504,GO:0012505,GO:0016021,GO:0005886,GO:0009506,GO:0031201,GO:0005802,GO:0043495,GO:0005484,GO:0000149,GO:0006952,GO:0050832,GO:0006887,GO:0006886,GO:0072660,GO:0031348,GO:0006612,GO:0010119,GO:0009737,GO:0009620,GO:0010148,GO:0048278,GO:0006906,GO:0016192	cell plate|endomembrane system|integral component of membrane|plasma membrane|plasmodesma|SNARE complex|trans-Golgi network|protein membrane anchor|SNAP receptor activity|SNARE binding|defense response|defense response to fungus|exocytosis|intracellular protein transport|maintenance of protein location in plasma membrane|negative regulation of defense response|protein targeting to membrane|regula…	sot04130	SNARE interactions in vesicular transport
Soltu.DM.01G002680	2615.84	2852.05	2379.63	0.834347	-0.261281	0.00103893	0.00494661	Down	14.6921	14.9871	14.6191	16.851	17.8307	18.7669	102600916	trs85-2	Transport protein particle subunit trs85-2	GO:0031410,GO:0005829,GO:0000407,GO:0030008,GO:1990072,GO:0000045,GO:0030242,GO:0006888,GO:0006886,GO:0051321,GO:0032258,GO:0034497	cytoplasmic vesicle|cytosol|phagophore assembly site|TRAPP complex|TRAPPIII protein complex|autophagosome assembly|autophagy of peroxisome|ER to Golgi vesicle-mediated transport|intracellular protein transport|meiotic cell cycle|protein localization by the Cvt pathway|protein localization to phagophore assembly site
Soltu.DM.01G002690	2479.29	2633.88	2324.7	0.882477	-0.18037	0.0318575	0.0901393	Down	18.8814	17.3333	16.5352	20.0276	20.311	19.8107	102584740		DExH-box ATP-dependent RNA helicase DExH1	GO:0005634,GO:0005524,GO:0034459,GO:0003723	nucleus|ATP binding|ATP-dependent 3'-5' RNA helicase activity|RNA binding	sot03018	RNA degradation
Soltu.DM.01G002710	1131.74	1079.01	1184.46	1.09759	0.134345	0.16497	0.319772	Up	14.3237	14.4881	14.2003	12.3733	13.712	13.3498	102601265	mct1	Malonyl CoA-acyl carrier protein transacylase, mitochondrial	GO:0005739,GO:0004314,GO:0006633	mitochondrion|[acyl-carrier-protein] S-malonyltransferase activity|fatty acid biosynthetic process	sot00061	Fatty acid biosynthesis
Soltu.DM.01G002720	1880.14	1635.43	2124.84	1.2992	0.377624	4.5e-06	3.53e-05	Up	30.9329	29.9072	30.3685	22.8933	23.4013	24.3727	102601599	SKIP22	F-box protein SKIP22	GO:0005634,GO:0016567	nucleus|protein ubiquitination
Soltu.DM.01G002750	541.234	565.101	517.366	0.915445	-0.127454	0.358346	0.543897	Down	13.3021	10.5507	14.223	14.0227	13.9886	13.8437		PUB22	E3 ubiquitin-protein ligase PUB22	GO:0005829,GO:0004842,GO:0006952,GO:0051865,GO:0016567,GO:0010200,GO:0009414	cytosol|ubiquitin-protein transferase activity|defense response|protein autoubiquitination|protein ubiquitination|response to chitin|response to water deprivation
Soltu.DM.01G002760	800.876	929.986	671.765	0.722521	-0.468888	8.96e-05	0.000547596	Down	14.1003	13.838	17.4096	20.9682	20.7342	21.4898	102602268	PUB22	E3 ubiquitin-protein ligase PUB22	GO:0005829,GO:0004842,GO:0006952,GO:0051865,GO:0016567,GO:0010200,GO:0009414	cytosol|ubiquitin-protein transferase activity|defense response|protein autoubiquitination|protein ubiquitination|response to chitin|response to water deprivation
Soltu.DM.01G002770	519.076	522.44	515.712	0.987507	-0.0181374	0.90428	0.947448	Down	9.49255	11.8956	13.7665	10.9603	12.2997	12.5885	102601938	PUB22	E3 ubiquitin-protein ligase PUB22	GO:0005829,GO:0004842,GO:0006952,GO:0051865,GO:0016567,GO:0010200,GO:0009414	cytosol|ubiquitin-protein transferase activity|defense response|protein autoubiquitination|protein ubiquitination|response to chitin|response to water deprivation
Soltu.DM.01G002790	110.372	142.288	78.4562	0.551761	-0.857884	0.000755911	0.00373539	Down	3.13928	3.80374	4.27699	7.19173	7.31345	5.96192	102602603	PUB22	E3 ubiquitin-protein ligase PUB22	GO:0005829,GO:0004842,GO:0006952,GO:0051865,GO:0016567,GO:0010200,GO:0009414	cytosol|ubiquitin-protein transferase activity|defense response|protein autoubiquitination|protein ubiquitination|response to chitin|response to water deprivation
Soltu.DM.01G002800	892.389	969.915	814.864	0.840233	-0.251139	0.0707924	0.169707	Down	16.6237	17.0695	21.8554	18.4226	23.5251	24.6133	102603282	PUB22	E3 ubiquitin-protein ligase PUB22	GO:0005829,GO:0004842,GO:0006952,GO:0051865,GO:0016567,GO:0010200,GO:0009414	cytosol|ubiquitin-protein transferase activity|defense response|protein autoubiquitination|protein ubiquitination|response to chitin|response to water deprivation
Soltu.DM.01G002810	609.791	663.101	556.482	0.838993	-0.25327	0.0882642	0.20196	Down	12.7771	12.1062	14.6036	13.7634	19.079	14.4726		PUB22	E3 ubiquitin-protein ligase PUB22	GO:0005829,GO:0004842,GO:0006952,GO:0051865,GO:0016567,GO:0010200,GO:0009414	cytosol|ubiquitin-protein transferase activity|defense response|protein autoubiquitination|protein ubiquitination|response to chitin|response to water deprivation
Soltu.DM.01G002820	2746.58	3366.44	2126.72	0.631655	-0.662791	1.22e-11	2.09e-10	Down	53.666	43.8763	52.218	73.2552	84.5904	80.7159	102603957	PUB22	E3 ubiquitin-protein ligase PUB22	GO:0005829,GO:0004842,GO:0006952,GO:0051865,GO:0016567,GO:0010200,GO:0009414	cytosol|ubiquitin-protein transferase activity|defense response|protein autoubiquitination|protein ubiquitination|response to chitin|response to water deprivation
Soltu.DM.01G002830	182.679	210.314	155.045	0.737565	-0.439157	0.0285275	0.0824272	Down	2.62341	3.03224	2.57921	3.81583	3.24588	4.19073	102604295	PUB24	E3 ubiquitin-protein ligase PUB24	GO:0004842,GO:0006952	ubiquitin-protein transferase activity|defense response
Soltu.DM.01G002840	694.188	617.128	771.249	1.25002	0.321952	0.019001	0.0592269	Up	9.18915	8.42199	8.94773	6.78555	5.98088	8.64917	102604620		BTB/POZ domain-containing protein At3g05675	GO:0016567	protein ubiquitination
Soltu.DM.01G002850	7876.51	8701.44	7051.59	0.810369	-0.303349	1.91e-05	0.000133953	Down	66.6584	65.1283	60.7672	77.8441	78.246	83.1124	102606309	BLH1	BEL1-like homeodomain protein 1	GO:0005737,GO:0005634,GO:0003677,GO:0003700,GO:0046982,GO:0042803,GO:0010197,GO:0009737,GO:0010201,GO:0009610	cytoplasm|nucleus|DNA binding|DNA-binding transcription factor activity|protein heterodimerization activity|protein homodimerization activity|polar nucleus fusion|response to abscisic acid|response to continuous far red light stimulus by the high-irradiance response system|response to symbiotic fungus
Soltu.DM.01G002900	103.964	66.8605	141.068	2.11164	1.07836	2.75e-05	0.000187186	Up	1.3344	1.40104	1.58604	0.681182	0.601019	0.781026	102578535	DGD1	Digalactosyldiacylglycerol synthase 1, chloroplastic	GO:0009707,GO:0043661,GO:0046481,GO:0009877	chloroplast outer membrane|peribacteroid membrane|digalactosyldiacylglycerol synthase activity|nodulation	sot00561	Glycerolipid metabolism
Soltu.DM.01G002910	6507.86	6359.42	6656.3	1.04675	0.0659221	0.394503	0.57919	Up	152.451	166.97	156.524	155.723	140.473	161.686	102578879	PSE1	Protein LEAD-SENSITIVE 1
Soltu.DM.01G002920	1682.96	1692.5	1673.42	0.988749	-0.0163239	0.856209	0.91929	Down	20.1312	18.5571	18.9853	20.1731	18.1459	20.4118	102579428	rio2	Serine/threonine-protein kinase rio2	GO:0005829,GO:0005634,GO:0030688,GO:0005524,GO:0046872,GO:0004672,GO:0004674,GO:0030490	cytosol|nucleus|preribosome, small subunit precursor|ATP binding|metal ion binding|protein kinase activity|protein serine/threonine kinase activity|maturation of SSU-rRNA	sot03008	Ribosome biogenesis in eukaryotes
Soltu.DM.01G002930	885.027	774.673	995.381	1.2851	0.361881	0.00434194	0.0171393	Up	6.89445	6.42826	8.33192	5.17224	5.45055	6.34837	102579753	TMK3	Receptor-like kinase TMK3	GO:0016021,GO:0009505,GO:0005886,GO:0009506,GO:0005524,GO:0004675,GO:0009555,GO:0006468	integral component of membrane|plant-type cell wall|plasma membrane|plasmodesma|ATP binding|transmembrane receptor protein serine/threonine kinase activity|pollen development|protein phosphorylation
Soltu.DM.01G002940	771.825	823.372	720.279	0.874747	-0.193062	0.0869658	0.199751	Down	5.10019	5.32429	5.03021	5.39519	6.01099	6.37991	102580073	ipi1	Pre-rRNA-processing protein ipi1	GO:0071339,GO:0005720,GO:0005634,GO:0097344,GO:0006364	MLL1 complex|nuclear heterochromatin|nucleus|Rix1 complex|rRNA processing
Soltu.DM.01G002950	3547.11	3444.6	3649.61	1.05958	0.0834924	0.280664	0.460903	Up	28.1533	29.9185	31.2437	27.3934	28.297	29.1654	102580399		Coatomer subunit beta-1	GO:0030126,GO:0005829,GO:0000139,GO:0009506,GO:0005198,GO:0006888,GO:0006891,GO:0006886	COPI vesicle coat|cytosol|Golgi membrane|plasmodesma|structural molecule activity|ER to Golgi vesicle-mediated transport|intra-Golgi vesicle-mediated transport|intracellular protein transport
Soltu.DM.01G002970	1381.24	1503.03	1259.45	0.837732	-0.255439	0.00921676	0.0326307	Down	20.1034	17.586	18.7908	22.2295	23.943	21.6463		CTF7	Protein CHROMOSOME TRANSMISSION FIDELITY 7	GO:0005737,GO:0005634,GO:0016407,GO:0046872,GO:0048653,GO:0051301,GO:0080186,GO:0000724,GO:0009793,GO:0009553,GO:0034089,GO:0060772,GO:0045132,GO:0000070,GO:0048609,GO:0034421,GO:0006275,GO:0048364,GO:0007062	cytoplasm|nucleus|acetyltransferase activity|metal ion binding|anther development|cell division|developmental vegetative growth|double-strand break repair via homologous recombination|embryo development ending in seed dormancy|embryo sac development|establishment of meiotic sister chromatid cohesion|leaf phyllotactic patterning|meiotic chromosome segregation|mitotic sister chromatid segregation|m…
Soltu.DM.01G002980	10.2108	0.679058	19.7425	29.4659	4.88098	0.000491399	0.00254803	Up	0.00868242	0.295591	0.19537	0.00865979	0	0.00872151	102581084	QKY	Protein QUIRKY	GO:0016021,GO:0005886,GO:0009506,GO:0099402	integral component of membrane|plasma membrane|plasmodesma|plant organ development
Soltu.DM.01G002990	190.929	190.487	191.37	1.00514	0.00738932	0.973185	0.985828	Up	5.63188	5.41782	7.01006	7.61873	5.52396	4.94195	102581419
Soltu.DM.01G003000	281.423	313.596	249.251	0.794144	-0.332528	0.0535052	0.136709	Down	5.21704	4.07115	3.96782	5.3308	5.91847	5.53371
Soltu.DM.01G003040	3902.44	3325.97	4478.9	1.3468	0.429536	9.26e-08	9.7e-07	Up	83.3596	92.1185	90.793	70.0649	62.3167	66.6725	102581750	NHL1	NDR1/HIN1-like protein 1	GO:0046658,GO:0016021,GO:0009506,GO:0051607	anchored component of plasma membrane|integral component of membrane|plasmodesma|defense response to virus
Soltu.DM.01G003050	292.545	228.51	356.58	1.55889	0.640516	0.000609125	0.00308461	Up	12.6114	9.23516	9.29637	5.8859	7.80908	6.3792	102582074	NHL10	NDR1/HIN1-like protein 10	GO:0046658,GO:0009507,GO:0016021,GO:0009506,GO:0051607,GO:0010150,GO:0051707	anchored component of plasma membrane|chloroplast|integral component of membrane|plasmodesma|defense response to virus|leaf senescence|response to other organism
Soltu.DM.01G003070	1.86778	3.0497	0.685851	0.222481	-2.16824	0.37407	0.559033	Down	0.0796312	0	0	0	0	0.359954	102596907	COAC1	Mitochondrial carrier protein CoAc1	GO:0016021,GO:0005743,GO:0015228,GO:1990559	integral component of membrane|mitochondrial inner membrane|coenzyme A transmembrane transporter activity|mitochondrial coenzyme A transmembrane transport
Soltu.DM.01G003080	469.94	472.407	467.473	0.989631	-0.0150376	0.909417	0.950217	Down	7.54692	8.03748	8.44797	7.54483	8.41625	8.48423	102582396	imp4	U3 small nucleolar ribonucleoprotein protein imp4	GO:0034457,GO:0005730,GO:0005634,GO:0032040,GO:0003723,GO:0042134,GO:0030515,GO:0006364	Mpp10 complex|nucleolus|nucleus|small-subunit processome|RNA binding|rRNA primary transcript binding|snoRNA binding|rRNA processing	sot03008	Ribosome biogenesis in eukaryotes
Soltu.DM.01G003090	157.405	134.23	180.58	1.3446	0.427176	0.116076	0.247716	Up	2.12075	2.00556	0.971482	1.21698	1.19866	1.40074	102582744	SMXL3	Protein SMAX1-LIKE 3	GO:0019538	protein metabolic process
Soltu.DM.01G003100	6.4685	0.322492	12.6145	35.1332	5.13476	0.000659807	0.00331003	Up	0.73868	0.452009	0.407392	0	0.0407458	0	102583076	LOG7	Cytokinin riboside 5'-monophosphate phosphoribohydrolase LOG7	GO:0005829,GO:0005634,GO:0016799,GO:0009691	cytosol|nucleus|hydrolase activity, hydrolyzing N-glycosyl compounds|cytokinin biosynthetic process
Soltu.DM.01G003110	130.96	142.634	119.286	0.83642	-0.2577	0.249686	0.42419	Down	1.4117	1.49478	1.28964	1.79313	1.56139	1.69682	102583404		Putative pentatricopeptide repeat-containing protein At5g65820
Soltu.DM.01G003120	828.704	806.543	850.865	1.05491	0.0771238	0.512138	0.681277	Up	22.3496	19.8466	21.6055	18.5718	19.3178	23.0186	102583732		2-Cys peroxiredoxin BAS1-like, chloroplastic	GO:0048046,GO:0009507,GO:0009570,GO:0010319,GO:0051920,GO:0008379,GO:0045454,GO:0042742,GO:0042744,GO:0009409,GO:0006979	apoplast|chloroplast|chloroplast stroma|stromule|peroxiredoxin activity|thioredoxin peroxidase activity|cell redox homeostasis|defense response to bacterium|hydrogen peroxide catabolic process|response to cold|response to oxidative stress
Soltu.DM.01G003130	172.416	192.839	151.993	0.788718	-0.342419	0.132903	0.273323	Down	3.3449	2.76782	4.18146	4.74943	3.48511	4.92328	102584074	MTERF1	Transcription termination factor MTEF1, chloroplastic	GO:0009507,GO:0003690,GO:0009658,GO:0032502,GO:0006353,GO:0009793,GO:0006355	chloroplast|double-stranded DNA binding|chloroplast organization|developmental process|DNA-templated transcription, termination|embryo development ending in seed dormancy|regulation of transcription, DNA-templated
Soltu.DM.01G003140	766.626	775.884	757.368	0.976141	-0.0348392	0.765912	0.864883	Down	10.6297	11.6182	10.3958	10.1596	11.2015	12.3111	102584400	E2FA	Transcription factor E2FA	GO:0005737,GO:0090575,GO:0003677,GO:0000981,GO:0046983,GO:0001077,GO:0001078,GO:0043565,GO:0008134,GO:0007049,GO:0000122,GO:0051446,GO:0045944,GO:0045893,GO:0051726	cytoplasm|RNA polymerase II transcription factor complex|DNA binding|DNA-binding transcription factor activity, RNA polymerase II-specific|protein dimerization activity|proximal promoter DNA-binding transcription activator activity, RNA polymerase II-specific|proximal promoter DNA-binding transcription repressor activity, RNA polymerase II-specific|sequence-specific DNA binding|transcription fact…
Soltu.DM.01G003150	380.537	356.223	404.852	1.13581	0.183721	0.229319	0.399944	Up	23.4364	19.438	21.3106	16.9756	21.11	18.7352	102584941
Soltu.DM.01G003160	33.7281	27.6241	39.8321	1.4412	0.527272	0.232127	0.403388	Up	0.640601	0.497073	0.770014	0.475103	0.508291	0.346492	102585262	HVA22I	HVA22-like protein i
Soltu.DM.01G003170	50.5229	49.7629	51.2829	1.02996	0.0425886	0.917313	0.954066	Up	5.50003	2.80706	4.74743	5.92107	4.09327	2.71855
Soltu.DM.01G003180	279.352	266.631	292.073	1.09571	0.131864	0.441481	0.62091	Up	4.0326	4.31726	4.60838	4.52296	3.93844	3.43933	102585600		Uncharacterized protein YPR147C	GO:0016021,GO:0005811,GO:0016788,GO:0004806,GO:0044255,GO:0019433	integral component of membrane|lipid droplet|hydrolase activity, acting on ester bonds|triglyceride lipase activity|cellular lipid metabolic process|triglyceride catabolic process
Soltu.DM.01G003220	367.113	358.982	375.244	1.04553	0.0642296	0.691452	0.816086	Up	10.4264	10.4156	11.2901	8.84667	9.58431	12.5385	102587385	CAF1-9	Probable CCR4-associated factor 1 homolog 9	GO:0030015,GO:0005634,GO:0000932,GO:0008408,GO:0046872,GO:0004535,GO:0003723,GO:0042742,GO:0002213,GO:0043928,GO:0017148,GO:0000289,GO:0009611	CCR4-NOT core complex|nucleus|P-body|3'-5' exonuclease activity|metal ion binding|poly(A)-specific ribonuclease activity|RNA binding|defense response to bacterium|defense response to insect|exonucleolytic nuclear-transcribed mRNA catabolic process involved in deadenylation-dependent decay|negative regulation of translation|nuclear-transcribed mRNA poly(A) tail shortening|response to wounding	sot03018	RNA degradation
Soltu.DM.01G003230	630.228	776.945	483.512	0.622173	-0.684612	3.99e-07	3.75e-06	Down	4.87945	4.89206	4.49891	6.41156	8.19237	8.48087	102587709	PCMP-H53	Pentatricopeptide repeat-containing protein At4g33170
Soltu.DM.01G003240	216.728	268.515	164.94	0.614138	-0.703364	0.000118215	0.00070526	Down	12.0535	11.5988	10.2437	18.0683	17.2518	20.2504
Soltu.DM.01G003250	5768.22	6533.57	5002.87	0.765701	-0.385146	6.85e-06	5.21e-05	Down	173.159	154.714	151.292	223.757	190.008	216.31	102588901	UEV1D	Ubiquitin-conjugating enzyme E2 variant 1D	GO:0005634,GO:0061631,GO:0006301,GO:0070534	nucleus|ubiquitin conjugating enzyme activity|postreplication repair|protein K63-linked ubiquitination
Soltu.DM.01G003270	582.65	619.162	546.138	0.881716	-0.181614	0.15213	0.301753	Down	6.32833	5.17644	5.72029	6.58157	6.76604	6.30249	102589445	ARC3	Protein ACCUMULATION AND REPLICATION OF CHLOROPLASTS 3	GO:0009707,GO:0009570,GO:0035452,GO:0003924,GO:0043621,GO:0010020	chloroplast outer membrane|chloroplast stroma|extrinsic component of plastid membrane|GTPase activity|protein self-association|chloroplast fission
Soltu.DM.01G003280	238.534	242.867	234.2	0.963634	-0.0534427	0.780724	0.874925	Down	3.07627	2.4014	2.16055	2.3765	2.63294	2.96652	102586049	IDD5	Protein indeterminate-domain 5, chloroplastic	GO:0009507,GO:0005634,GO:0003700,GO:0046872,GO:0043565,GO:0045893,GO:0006355	chloroplast|nucleus|DNA-binding transcription factor activity|metal ion binding|sequence-specific DNA binding|positive regulation of transcription, DNA-templated|regulation of transcription, DNA-templated
Soltu.DM.01G003290	8.33949	12.7017	3.97728	0.312468	-1.67822	0.0577556	0.145067	Down	0.0618185	0.0467688	0.0347757	0.197304	0.139125	0.124194	102589772	BHLH111	Transcription factor bHLH111	GO:0005634,GO:0003677,GO:0046983	nucleus|DNA binding|protein dimerization activity
Soltu.DM.01G003300	552.759	544.843	560.675	1.02886	0.0410416	0.751134	0.855775	Up	9.97433	8.06941	9.04099	8.79155	8.4365	9.27029	102590101	TOM3	Tobamovirus multiplication protein 3	GO:0016021,GO:0009705,GO:0046786	integral component of membrane|plant-type vacuole membrane|viral replication complex formation and maintenance
Soltu.DM.01G003320	1375.44	1332.54	1418.33	1.0644	0.0900401	0.395216	0.579824	Up	25.7292	27.9158	25.1051	22.1101	24.4662	27.9302	102590419	SCOA	Succinate--CoA ligase [ADP-forming] subunit alpha-1, mitochondrial	GO:0005739,GO:0045244,GO:0048037,GO:0019003,GO:0004550,GO:0004775,GO:0004776,GO:0009142,GO:0006105,GO:0006104,GO:0006099	mitochondrion|succinate-CoA ligase complex (GDP-forming)|cofactor binding|GDP binding|nucleoside diphosphate kinase activity|succinate-CoA ligase (ADP-forming) activity|succinate-CoA ligase (GDP-forming) activity|nucleoside triphosphate biosynthetic process|succinate metabolic process|succinyl-CoA metabolic process|tricarboxylic acid cycle	sot00020,sot00640	Citrate cycle (TCA cycle)|Propanoate metabolism
Soltu.DM.01G003330	1852.5	2129.99	1575	0.739494	-0.43539	6.42e-06	4.91e-05	Down	39.8329	38.6928	39.7862	60.2104	49.7709	51.0635	102590772	NIC2	Nicotinamidase 2	GO:0008936,GO:0019674,GO:0019363	nicotinamidase activity|NAD metabolic process|pyridine nucleotide biosynthetic process
Soltu.DM.01G003350	1006.13	1182.96	829.303	0.700781	-0.512965	2.02e-06	1.68e-05	Down	18.4985	16.5656	16.5235	23.1533	26.6299	24.2613	102591124		F-box protein At1g70590
Soltu.DM.01G003360	1051.04	1032.52	1069.56	1.03603	0.0510613	0.639527	0.778847	Up	22.5693	26.9292	25.37	22.3908	24.541	25.8304		GGAT2	Glutamate--glyoxylate aminotransferase 2	GO:0009507,GO:0009570,GO:0005777,GO:0008453,GO:0047958,GO:0004021,GO:0030170,GO:0009058,GO:0042853	chloroplast|chloroplast stroma|peroxisome|alanine-glyoxylate transaminase activity|glycine:2-oxoglutarate aminotransferase activity|L-alanine:2-oxoglutarate aminotransferase activity|pyridoxal phosphate binding|biosynthetic process|L-alanine catabolic process
Soltu.DM.01G003390	366.678	381.794	351.563	0.921288	-0.118276	0.490207	0.664127	Down	21.6798	33.6488	29.481	29.4638	31.6584	31.5855	102591453	GGAT1	Glutamate--glyoxylate aminotransferase 1	GO:0048046,GO:0009507,GO:0016020,GO:0005777,GO:0005773,GO:0008453,GO:0047958,GO:0004021,GO:0030170,GO:0006545,GO:0042853,GO:0009853,GO:0001666	apoplast|chloroplast|membrane|peroxisome|vacuole|alanine-glyoxylate transaminase activity|glycine:2-oxoglutarate aminotransferase activity|L-alanine:2-oxoglutarate aminotransferase activity|pyridoxal phosphate binding|glycine biosynthetic process|L-alanine catabolic process|photorespiration|response to hypoxia	sot00220,sot00250,sot00260,sot00630,sot00710	Arginine biosynthesis|Alanine, aspartate and glutamate metabolism|Glycine, serine and threonine metabolism|Glyoxylate and dicarboxylate metabolism|Carbon fixation in photosynthetic organisms
Soltu.DM.01G003420	914.873	833.174	996.573	1.19555	0.257679	0.0838373	0.194051	Up	23.1119	16.6801	15.4321	15.6964	17.1634	13.5745	102591792
Soltu.DM.01G003430	13.5488	13.6066	13.4911	0.990762	-0.0133891	0.985847	0.992925	Down	0.12417	0.256202	0.063501	0.0675525	0.190534	0.192763		CRK2	Cysteine-rich receptor-like protein kinase 2
Soltu.DM.01G003440	660.178	770.908	549.448	0.71264	-0.488754	0.000237206	0.00132337	Down	4.88078	5.78319	4.66583	6.42393	7.9242	7.29646		CRK2	Cysteine-rich receptor-like protein kinase 2
Soltu.DM.01G003450	266.186	312.211	220.161	0.704926	-0.504456	0.0137027	0.0453184	Down	3.23327	4.17349	2.42802	4.3864	5.2879	4.35609		CRK2	Cysteine-rich receptor-like protein kinase 2
Soltu.DM.01G003460	17.3218	19.2527	15.3909	0.80161	-0.319028	0.655812	0.791263	Down	0.214498	0.276611	0.383934	0.758513	0.127999	0.215464	102587710	CRK2	Cysteine-rich receptor-like protein kinase 2
Soltu.DM.01G003470	33.8239	40.3896	27.2582	0.674483	-0.568147	0.2261	0.396232	Down	0.379537	0.421345	0.510559	0.378548	0.928438	0.646461		CRK2	Cysteine-rich receptor-like protein kinase 2
Soltu.DM.01G003490	131.517	87.6593	175.375	2.00027	1.00019	0.000206439	0.00116862	Up	2.53383	1.69332	1.53098	0.887337	0.792011	1.22171	102596000	CRK2	Cysteine-rich receptor-like protein kinase 2
Soltu.DM.01G003500	19.0692	17.6251	20.5133	1.16217	0.216819	0.727882	0.840116	Up	0.291423	0.165357	0.240443	0.0813858	0.229551	0.292735	102592909	CRK2	Cysteine-rich receptor-like protein kinase 2
Soltu.DM.01G003510	646.679	461.589	831.769	1.80227	0.849817	5.97e-11	9.55e-10	Up	8.4259	10.914	9.60073	5.14235	5.45024	5.57462	102592337	CRK2	Cysteine-rich receptor-like protein kinase 2
Soltu.DM.01G003520	8118.5	7924.38	8312.62	1.04902	0.0690426	0.290387	0.471166	Up	213.195	219.995	218.284	211.245	202.842	211.076	102596328	ARF	ADP-ribosylation factor 2	GO:0005737,GO:0005794,GO:0005525,GO:0006886,GO:0006471,GO:0016192	cytoplasm|Golgi apparatus|GTP binding|intracellular protein transport|protein ADP-ribosylation|vesicle-mediated transport	sot04144	Endocytosis
Soltu.DM.01G003530	28.7773	32.0223	25.5324	0.798415	-0.32479	0.50601	0.676426	Down	0.797146	1.74328	1.16779	1.7889	1.58845	1.30119	102596656	TBP	TATA-box-binding protein	GO:0005634,GO:0003677,GO:0006352	nucleus|DNA binding|DNA-templated transcription, initiation	sot03022	Basal transcription factors
Soltu.DM.01G003540	962.22	694.394	1230.05	1.77222	0.825562	5.87e-11	9.41e-10	Up	21.7886	24.4675	26.9763	14.2774	11.719	15.651	102597312
Soltu.DM.01G003550	324.636	299.38	349.892	1.16943	0.225806	0.204837	0.370597	Up	6.08605	5.77278	6.78567	5.45041	4.14746	6.48063	102596988	ENT1	Equilibrative nucleotide transporter 1	GO:0016021,GO:0005774,GO:0005337	integral component of membrane|vacuolar membrane|nucleoside transmembrane transporter activity
Soltu.DM.01G003570	126.27	78.0662	174.473	2.23502	1.16029	1.8e-05	0.000126513	Up	2.79342	1.92401	3.4971	1.38502	1.24159	1.0705	102598278	AXY4	Protein ALTERED XYLOGLUCAN 4	GO:0005794,GO:0000139,GO:0016021,GO:0016413,GO:0010411	Golgi apparatus|Golgi membrane|integral component of membrane|O-acetyltransferase activity|xyloglucan metabolic process
Soltu.DM.01G003580	822.142	840.482	803.803	0.956394	-0.0643227	0.555004	0.715029	Down	11.0707	10.8414	11.0119	12.4991	11.2376	10.9089	102598621		Putative ribonuclease H protein At1g65750	GO:0046872,GO:0003676,GO:0004523	metal ion binding|nucleic acid binding|RNA-DNA hybrid ribonuclease activity
Soltu.DM.01G003590	1245.58	1379.37	1111.79	0.805797	-0.311512	0.0018991	0.00837048	Down	22.0639	18.7683	20.0875	24.2183	26.0827	25.7691	102599594
Soltu.DM.01G003600	24806.5	26038.9	23574	0.905315	-0.143508	0.0702464	0.168825	Down	2638.21	2528.02	2351.28	2613.44	3021.31	2720.19	102600252	RPS27B	40S ribosomal protein S27-2	GO:0005618,GO:0022626,GO:0022627,GO:0009506,GO:0042788,GO:0005840,GO:0046872,GO:0003735,GO:0000028,GO:0006412	cell wall|cytosolic ribosome|cytosolic small ribosomal subunit|plasmodesma|polysomal ribosome|ribosome|metal ion binding|structural constituent of ribosome|ribosomal small subunit assembly|translation	sot03010	Ribosome
Soltu.DM.01G003610	2741.41	2702.51	2780.31	1.02872	0.0408548	0.623411	0.767014	Up	309.869	277.627	299.14	301.753	288.008	277.534	102599917	RPS27B	40S ribosomal protein S27-2	GO:0005618,GO:0022626,GO:0022627,GO:0009506,GO:0042788,GO:0005840,GO:0046872,GO:0003735,GO:0000028,GO:0006412	cell wall|cytosolic ribosome|cytosolic small ribosomal subunit|plasmodesma|polysomal ribosome|ribosome|metal ion binding|structural constituent of ribosome|ribosomal small subunit assembly|translation	sot03010	Ribosome
Soltu.DM.01G003620	1424.19	1627.63	1220.75	0.750038	-0.414964	0.00138433	0.00636643	Down	25.3925	20.2175	30.7906	32.0272	34.4387	36.0718	102600811		Uncharacterized protein At4g14100	GO:0005773	vacuole
Soltu.DM.01G003630	19710.4	17045	22375.8	1.31276	0.392603	0.10127	0.223511	Up	311.106	277.746	413.572	223.45	228.971	316.983	102601151	CYP51G1	Sterol 14-demethylase	GO:0005783,GO:0005794,GO:0016021,GO:0005886,GO:0020037,GO:0005506,GO:0008168,GO:0008398,GO:0055114,GO:0016126,GO:0016125	endoplasmic reticulum|Golgi apparatus|integral component of membrane|plasma membrane|heme binding|iron ion binding|methyltransferase activity|sterol 14-demethylase activity|oxidation-reduction process|sterol biosynthetic process|sterol metabolic process	sot00100	Steroid biosynthesis
Soltu.DM.01G003640	2476.72	2560.66	2392.78	0.934345	-0.097972	0.22296	0.392317	Down	13.2457	12.9898	13.0685	13.8742	14.7718	13.6788	102601489	HAC1	Histone acetyltransferase HAC1	GO:0005634,GO:0004402,GO:0003712,GO:0008270,GO:0006355	nucleus|histone acetyltransferase activity|transcription coregulator activity|zinc ion binding|regulation of transcription, DNA-templated	sot03250	Viral life cycle - HIV-1
Soltu.DM.01G003650	35.3843	33.2522	37.5165	1.12609	0.171328	0.719772	0.834931	Up	5.34603	3.84231	2.50615	4.26568	4.21101	1.93324
Soltu.DM.01G003660	253.678	96.3862	410.969	4.26792	2.09353	7.5e-28	4.12e-26	Up	5.05895	5.01812	4.74314	1.11031	0.939501	1.4537	102602270
Soltu.DM.01G003670	568.99	626.133	511.847	0.817288	-0.291084	0.038423	0.104939	Down	4.26098	3.28631	3.95164	4.27293	4.55198	5.34053	102602831	PSKR	Phytosulfokine receptor 1	GO:0016021,GO:0005886,GO:0005524,GO:0004674	integral component of membrane|plasma membrane|ATP binding|protein serine/threonine kinase activity
Soltu.DM.01G003680	1.45115	0	2.9023	15.7884	3.98079	0.119095	0.252652	Up	0	0.210916	0.418214	0	0	0
Soltu.DM.01G003690	834.757	757.635	911.879	1.20367	0.267445	0.0131547	0.0437609	Up	16.8726	16.3718	17.5571	13.4553	13.7075	15.3363	102603168	SG1	protein SLOW GREEN 1, chloroplastic	GO:0009507,GO:0009941,GO:0009536,GO:0009658	chloroplast|chloroplast envelope|plastid|chloroplast organization
Soltu.DM.01G003710	1049.67	957.855	1141.48	1.1917	0.253021	0.0114371	0.0390198	Up	12.4748	11.2166	12.1607	10.4116	9.64729	10.2261	102603511		Zinc finger CCCH domain-containing protein 17	GO:0005622,GO:0003677,GO:0046872,GO:0003729,GO:0016973	intracellular|DNA binding|metal ion binding|mRNA binding|poly(A)+ mRNA export from nucleus
Soltu.DM.01G003720	993.547	842.369	1144.72	1.35934	0.442909	8.14e-05	0.000501699	Up	24.1596	28.3575	28.8457	19.2578	19.043	21.9909
Soltu.DM.01G003730	685.761	547.968	823.555	1.50359	0.588412	2.12e-06	1.76e-05	Up	23.8533	27.0873	25.2192	17.5902	14.8425	18.6078
Soltu.DM.01G003740	7.31355	4.99139	9.63571	1.92589	0.945528	0.308223	0.490828	Up	0.352442	0.282023	0.127093	0.135201	0.152535	0.108932	102590025	STP8	Sugar transport protein 8	GO:0005887,GO:0005886,GO:0090406,GO:0005351,GO:0005355,GO:0015145,GO:0008645,GO:0015749	integral component of plasma membrane|plasma membrane|pollen tube|carbohydrate:proton symporter activity|glucose transmembrane transporter activity|monosaccharide transmembrane transporter activity|hexose transmembrane transport|monosaccharide transmembrane transport
Soltu.DM.01G003760	157.748	117.292	198.205	1.68988	0.756917	0.000623288	0.0031473	Up	4.97622	6.16451	5.67509	2.69931	3.52021	3.80013	102603849
Soltu.DM.01G003770	145.379	95.5773	195.181	2.04414	1.03149	8.79e-06	6.56e-05	Up	7.22063	9.81308	10.1772	4.8648	4.03567	4.5152	107060833
Soltu.DM.01G003780	180.542	192.547	168.537	0.874919	-0.192778	0.347941	0.533152	Down	4.77826	5.38218	4.79385	5.13007	6.76384	5.28892	102604518
Soltu.DM.01G003800	288.897	333.513	244.28	0.732833	-0.448444	0.0120915	0.0407902	Down	6.32109	7.36795	7.24961	8.53322	8.51897	11.754	102604852		UPF0664 stress-induced protein C29B12.11c	GO:0005829,GO:0005634,GO:0031490,GO:0003713,GO:0045944	cytosol|nucleus|chromatin DNA binding|transcription coactivator activity|positive regulation of transcription by RNA polymerase II
Soltu.DM.01G003810	1505.83	1600.88	1410.77	0.881258	-0.182364	0.0415368	0.111667	Down	51.2782	55.7798	51.4002	59.2139	61.1627	60.6034	102605188	TCP7	Transcription factor TCP7	GO:0005634,GO:0003700,GO:0043565,GO:0042752,GO:0006355	nucleus|DNA-binding transcription factor activity|sequence-specific DNA binding|regulation of circadian rhythm|regulation of transcription, DNA-templated	sot04712	Circadian rhythm - plant
Soltu.DM.01G003830	404.596	377.553	431.638	1.1429	0.192701	0.197245	0.360872	Up	13.0629	9.8827	11.3033	9.93447	9.64638	10.5794	102605867	ATHX	Thioredoxin X, chloroplastic	GO:0009507,GO:0009570,GO:0005737,GO:0008047,GO:0016671,GO:0015035,GO:0047134,GO:0045454,GO:0006662,GO:0043085	chloroplast|chloroplast stroma|cytoplasm|enzyme activator activity|oxidoreductase activity, acting on a sulfur group of donors, disulfide as acceptor|protein disulfide oxidoreductase activity|protein-disulfide reductase activity|cell redox homeostasis|glycerol ether metabolic process|positive regulation of catalytic activity
Soltu.DM.01G003840	225.13	255.224	195.037	0.764418	-0.387567	0.0298694	0.0854028	Down	5.53674	6.80985	5.85124	7.94829	7.95296	8.06924	102606207
Soltu.DM.01G003850	1128.31	1167.59	1089.03	0.932786	-0.100382	0.297836	0.479033	Down	30.8577	32.4583	30.7083	32.9925	32.6294	35.8752	102578214		Probable prefoldin subunit 5	GO:0005737,GO:0005829,GO:0016272,GO:0051082,GO:0006457	cytoplasm|cytosol|prefoldin complex|unfolded protein binding|protein folding
Soltu.DM.01G003860	819.713	651.437	987.989	1.51705	0.601273	2.64e-08	3e-07	Up	13.4877	14.1739	13.89	9.56787	8.45439	9.56361	102578537	RRD2	Serine/threonine-protein phosphatase 2A activator 2	GO:0005737,GO:0003755,GO:0019211	cytoplasm|peptidyl-prolyl cis-trans isomerase activity|phosphatase activator activity
Soltu.DM.01G003870	328.011	390.267	265.756	0.680963	-0.554352	0.000397531	0.00210778	Down	3.39449	3.8414	3.7685	5.17054	5.99328	5.09326	102578881	PYRD	Dihydroorotate dehydrogenase (quinone), mitochondrial	GO:0016021,GO:0005743,GO:0005739,GO:0005886,GO:0004152,GO:0006207,GO:0044205,GO:0009220	integral component of membrane|mitochondrial inner membrane|mitochondrion|plasma membrane|dihydroorotate dehydrogenase activity|'de novo' pyrimidine nucleobase biosynthetic process|'de novo' UMP biosynthetic process|pyrimidine ribonucleotide biosynthetic process	sot00240	Pyrimidine metabolism
Soltu.DM.01G003880	41.7017	38.453	44.9504	1.16673	0.222465	0.594639	0.745608	Up	0.891561	0.86	0.585134	0.604682	0.919643	0.483611	102589019	TAT	Tabersonine-19-hydroxy-O-acetyltransferase
Soltu.DM.01G003890	4002.68	4057.01	3948.35	0.973258	-0.0391055	0.595576	0.746382	Down	60.1627	61.9524	58.9435	62.9395	59.3364	65.0313			Phenylalanine--tRNA ligase beta subunit, cytoplasmic	GO:0005829,GO:0009328,GO:0005524,GO:0000287,GO:0004826,GO:0003723,GO:0006432	cytosol|phenylalanine-tRNA ligase complex|ATP binding|magnesium ion binding|phenylalanine-tRNA ligase activity|RNA binding|phenylalanyl-tRNA aminoacylation
Soltu.DM.01G003900	720.428	764.685	676.171	0.884191	-0.17757	0.1019	0.224468	Down	28.035	27.846	28.3684	31.926	32.6209	31.3379	102579212		Phenylalanine--tRNA ligase beta subunit, cytoplasmic	GO:0005829,GO:0009328,GO:0005524,GO:0000287,GO:0004826,GO:0003723,GO:0006432	cytosol|phenylalanine-tRNA ligase complex|ATP binding|magnesium ion binding|phenylalanine-tRNA ligase activity|RNA binding|phenylalanyl-tRNA aminoacylation	sot00970	Aminoacyl-tRNA biosynthesis
Soltu.DM.01G003910	883.159	975.546	790.772	0.810598	-0.302941	0.0122587	0.041281	Down	19.2709	16.6272	17.4389	25.0123	19.4809	21.7513		SGR2	Phospholipase SGR2	GO:0009705,GO:0009506,GO:0005773,GO:0046872,GO:0008970,GO:0004620,GO:0009660,GO:0009590,GO:0016042,GO:0009959	plant-type vacuole membrane|plasmodesma|vacuole|metal ion binding|phospholipase A1 activity|phospholipase activity|amyloplast organization|detection of gravity|lipid catabolic process|negative gravitropism
Soltu.DM.01G003920	3748.98	3942.13	3555.84	0.902028	-0.148756	0.0617184	0.152777	Down	27.2566	26.1018	27.7709	32.3448	29.3017	28.8729	102579534		Biotin carboxylase 1, chloroplastic	GO:0009507,GO:0003989,GO:0005524,GO:0004075,GO:0046872,GO:0006633,GO:2001295	chloroplast|acetyl-CoA carboxylase activity|ATP binding|biotin carboxylase activity|metal ion binding|fatty acid biosynthetic process|malonyl-CoA biosynthetic process
Soltu.DM.01G003930	540.056	535.592	544.521	1.01658	0.0237189	0.85136	0.916483	Up	13.1423	14.5688	13.1176	13.4415	14.2291	12.7364	102581085	RPL19	50S ribosomal protein L19, chloroplastic	GO:0009507,GO:0005840,GO:0019843,GO:0003735,GO:0006412	chloroplast|ribosome|rRNA binding|structural constituent of ribosome|translation	sot03010	Ribosome
Soltu.DM.01G003950	3.59474	2.98559	4.20388	1.41066	0.496368	0.728892	0.840455	Up	0	0.496502	0.307652	0.0654561	0.246161	0.26369	102598183
Soltu.DM.01G003960	885.193	870.36	900.025	1.03413	0.0484128	0.674059	0.803694	Up	31.2068	30.4549	35.249	28.2892	31.93	34.1297	102581420		Splicing factor 3B subunit 6-like protein	GO:0071013,GO:0005689,GO:0005686,GO:0003723,GO:0000398	catalytic step 2 spliceosome|U12-type spliceosomal complex|U2 snRNP|RNA binding|mRNA splicing, via spliceosome	sot03040	Spliceosome
Soltu.DM.01G003970	2347.23	2202.89	2491.57	1.13118	0.177824	0.0329305	0.0926762	Up	38.0041	39.7417	40.4842	34.285	33.3175	37.652	102581751	RPN8A	26S proteasome non-ATPase regulatory subunit 7 homolog A	GO:0005829,GO:0000502,GO:0005838,GO:0045087,GO:0009965,GO:0043161	cytosol|proteasome complex|proteasome regulatory particle|innate immune response|leaf morphogenesis|proteasome-mediated ubiquitin-dependent protein catabolic process	sot03050	Proteasome
Soltu.DM.01G003980	29.8355	42.914	16.757	0.390619	-1.35617	0.00375383	0.0151151	Down	0.865085	1.16871	0.984885	2.4036	3.01307	2.35866		PCMP-E71	Putative pentatricopeptide repeat-containing protein At1g10330
Soltu.DM.01G004010	28.1359	27.6514	28.6204	1.03497	0.0495909	0.915537	0.953064	Up	2.51892	2.11743	3.1489	2.32626	2.71199	2.53026		PCMP-E71	Putative pentatricopeptide repeat-containing protein At1g10330
Soltu.DM.01G004030	38.5249	40.9149	36.1348	0.883167	-0.179242	0.658841	0.79337	Down	3.65997	4.84566	4.34656	4.86725	5.72008	4.0441	102592667
Soltu.DM.01G004040	5.28452	2.33926	8.22977	3.52031	1.8157	0.127945	0.266322	Up	0.245572	0.203205	0.287803	0	0.0575698	0.154174		HCR9-0	Receptor-like protein Cf-9 homolog	GO:0016021,GO:0005886	integral component of membrane|plasma membrane
Soltu.DM.01G004100	4.14432	1.67792	6.61072	3.94643	1.98055	0.149656	0.298454	Up	0.0932499	0.125979	0.0374695	0	0.0124918	0.0535256		HCR9-0	Receptor-like protein Cf-9 homolog	GO:0016021,GO:0005886	integral component of membrane|plasma membrane
Soltu.DM.01G004150	4.13363	5.00371	3.26355	0.653793	-0.613093	0.61959	0.764473	Down	0.0236617	0.0223765	0.0665537	0.0236	0.0554703	0.0950728		HCR9-0	Receptor-like protein Cf-9 homolog	GO:0016021,GO:0005886	integral component of membrane|plasma membrane
Soltu.DM.01G004240	6.72877	6.29637	7.16116	1.13841	0.187017	0.846813	0.91419	Up	0.075324	0.189954	0.258947	0.10017	0.2119	0.151326		HCR9-0	Receptor-like protein Cf-9 homolog	GO:0016021,GO:0005886	integral component of membrane|plasma membrane
Soltu.DM.01G004270	11.2987	13.3507	9.24658	0.692183	-0.530774	0.480566	0.655347	Down	0.546893	0.517189	0.410202	1.03639	0.717969	0.384548
Soltu.DM.01G004440	1.99644	0.340202	3.65268	10.1715	3.34647	0.0968019	0.216326	Up	0.194999	0.110645	0.109695	0.0388981	0	0
Soltu.DM.01G004460	4.13552	1.69697	6.57407	3.89997	1.96346	0.14968	0.298456	Up	0.0779994	0.177031	0.0438782	0.0311185	0	0.0470104		HCR9-0	Receptor-like protein Cf-9 homolog	GO:0016021,GO:0005886	integral component of membrane|plasma membrane
Soltu.DM.01G004470	5.26254	5.24304	5.28204	1.00379	0.00546304	0.996393	0.998378	Up	0.107646	0.203599	0.0201853	0.0214731	0.222074	0.0865048		9DC2	Receptor-like protein 9DC2	GO:0016021,GO:0005886,GO:0050832	integral component of membrane|plasma membrane|defense response to fungus
Soltu.DM.01G004490	1.63216	0	3.26432	17.7376	4.14874	0.0997692	0.221215	Up	0.0334675	0.284848	0	0	0	0		HCR9-0	Receptor-like protein Cf-9 homolog	GO:0016021,GO:0005886	integral component of membrane|plasma membrane
Soltu.DM.01G004510	7.39438	2.70121	12.0875	4.5023	2.17066	0.0320249	0.0904781	Up	0.193638	0.366242	0.414972	0.137952	0.0259399	0.0555743		9DC2	Receptor-like protein 9DC2	GO:0016021,GO:0005886,GO:0050832	integral component of membrane|plasma membrane|defense response to fungus
Soltu.DM.01G004530	251.946	216.88	287.013	1.32371	0.404592	0.0172445	0.0546979	Up	5.94226	5.59987	5.84404	4.37255	3.9551	4.90461		HCR9-0	Receptor-like protein Cf-9 homolog	GO:0016021,GO:0005886	integral component of membrane|plasma membrane
Soltu.DM.01G004540	134.952	130.127	139.776	1.07531	0.104747	0.673093	0.803178	Up	1.46683	2.35555	1.81638	1.98748	1.49227	1.80704	102593991	DTX42	Protein DETOXIFICATION 42	GO:0016021,GO:0005886,GO:0015297,GO:0015137,GO:0015746,GO:0010044	integral component of membrane|plasma membrane|antiporter activity|citrate transmembrane transporter activity|citrate transport|response to aluminum ion
Soltu.DM.01G004560	82.1715	88.8318	75.5112	0.849998	-0.234468	0.435823	0.615701	Down	1.03252	1.30632	0.73259	1.23858	1.13831	1.26142	102594544
Soltu.DM.01G004570	141.451	128.698	154.204	1.19907	0.261919	0.235516	0.407526	Up	1.73094	2.02209	1.96894	1.59949	1.40832	1.80266	102594770	CPK8	Calcium-dependent protein kinase 8	GO:0005886,GO:0005524,GO:0005509,GO:0004674	plasma membrane|ATP binding|calcium ion binding|protein serine/threonine kinase activity	sot04626	Plant-pathogen interaction
Soltu.DM.01G004580	2.79137	2.66849	2.91426	1.095	0.130925	0.940225	0.966414	Up	0.0452422	0	0.339343	0.225621	0.127274	0
Soltu.DM.01G004590	129.333	78.6379	180.029	2.28716	1.19356	2.41e-06	1.99e-05	Up	8.10891	5.14734	6.17937	2.51127	3.02074	3.01269
Soltu.DM.01G004600	68.2188	35.9093	100.528	2.804	1.48749	1.59e-05	0.000113288	Up	4.20184	3.70092	4.17128	1.35588	0.927099	2.069
Soltu.DM.01G004620	463.311	461.638	464.985	1.00745	0.0107027	0.94081	0.966803	Up	10.272	13.2151	11.8551	10.6873	12.2971	12.3348	102598716	MFDX2	Adrenodoxin-like protein 2, mitochondrial	GO:0005739,GO:0051537,GO:0009055,GO:0046872	mitochondrion|2 iron, 2 sulfur cluster binding|electron transfer activity|metal ion binding
Soltu.DM.01G004630	540.77	511.414	570.127	1.11455	0.156462	0.255814	0.431341	Up	5.17779	5.8513	5.58556	4.49632	5.73642	4.75931	102595430		Pentatricopeptide repeat-containing protein At2g01390
Soltu.DM.01G004640	156.407	148.68	164.135	1.10487	0.143882	0.518266	0.686323	Up	3.9356	4.74952	5.36966	4.97991	3.93838	3.89432	102595104					sot03060,sot04141	Protein export|Protein processing in endoplasmic reticulum
Soltu.DM.01G004650	847.441	978.053	716.83	0.732761	-0.448586	0.000188027	0.00107474	Down	13.5659	12.3768	14.0466	15.9924	20.0595	18.8549	102595987	NFYA1	Nuclear transcription factor Y subunit A-1	GO:0016602,GO:0003677,GO:0003700,GO:0009793,GO:0055046,GO:0048510,GO:0006355,GO:0048316,GO:0010262	CCAAT-binding factor complex|DNA binding|DNA-binding transcription factor activity|embryo development ending in seed dormancy|microgametogenesis|regulation of timing of transition from vegetative to reproductive phase|regulation of transcription, DNA-templated|seed development|somatic embryogenesis
Soltu.DM.01G004680	6.38432	5.40512	7.36352	1.36226	0.446001	0.683182	0.810462	Up	0.792994	0.230746	0.285958	0.730087	0.114402	0.122548	107058773	LRK10	Rust resistance kinase Lr10	GO:0016021,GO:0005886,GO:0005524,GO:0004674	integral component of membrane|plasma membrane|ATP binding|protein serine/threonine kinase activity
Soltu.DM.01G004690	18.7346	24.3761	13.0932	0.537979	-0.894378	0.176577	0.335309	Down	0.178106	0.649667	0.143132	0.609057	0.57262	0.638956		LRK10	Rust resistance kinase Lr10	GO:0016021,GO:0005886,GO:0005524,GO:0004674	integral component of membrane|plasma membrane|ATP binding|protein serine/threonine kinase activity
Soltu.DM.01G004700	7.94	8.69415	7.18585	0.828637	-0.271187	0.755991	0.858764	Down	0.153483	0.32658	0.323778	0.420978	0.287849	0.269804	102596641	LRK10	Rust resistance kinase Lr10	GO:0016021,GO:0005886,GO:0005524,GO:0004674	integral component of membrane|plasma membrane|ATP binding|protein serine/threonine kinase activity
Soltu.DM.01G004710	28.2201	31.5398	24.9005	0.788998	-0.341907	0.535871	0.700432	Down	2.16271	0.759663	1.56423	1.41751	1.21682	3.1035	102588794	XRCC2	DNA repair protein XRCC2 homolog	GO:0033063,GO:0005657,GO:0005524,GO:0003677,GO:0008094,GO:0000724,GO:0007131	Rad51B-Rad51C-Rad51D-XRCC2 complex|replication fork|ATP binding|DNA binding|DNA-dependent ATPase activity|double-strand break repair via homologous recombination|reciprocal meiotic recombination
Soltu.DM.01G004720	9.44172	9.28197	9.60147	1.03175	0.045091	0.955768	0.975687	Up	0.630891	0.348031	0.492922	0.262186	0.640902	0.528109		XRCC2	DNA repair protein XRCC2 homolog	GO:0033063,GO:0005657,GO:0005524,GO:0003677,GO:0008094,GO:0000724,GO:0007131	Rad51B-Rad51C-Rad51D-XRCC2 complex|replication fork|ATP binding|DNA binding|DNA-dependent ATPase activity|double-strand break repair via homologous recombination|reciprocal meiotic recombination
Soltu.DM.01G004730	11.1785	17.0878	5.26931	0.308588	-1.69625	0.0287499	0.0828566	Down	0.0701765	0.079638	0.0657957	0.195982	0.171096	0.338364		LRK10	Rust resistance kinase Lr10	GO:0016021,GO:0005886,GO:0005524,GO:0004674	integral component of membrane|plasma membrane|ATP binding|protein serine/threonine kinase activity
Soltu.DM.01G004740	8.5	15.3865	1.61345	0.106134	-3.23604	0.00211404	0.00917372	Down	0	0.025602	0.0380735	0.283519	0.177705	0.149568		LRK10	Rust resistance kinase Lr10	GO:0016021,GO:0005886,GO:0005524,GO:0004674	integral component of membrane|plasma membrane|ATP binding|protein serine/threonine kinase activity
Soltu.DM.01G004750	72.1679	82.8832	61.4526	0.74152	-0.431442	0.157716	0.309355	Down	4.26576	5.58564	4.84551	6.79107	7.53867	5.60342	102597626	XRCC2	DNA repair protein XRCC2 homolog	GO:0033063,GO:0005657,GO:0005524,GO:0003677,GO:0008094,GO:0000724,GO:0007131	Rad51B-Rad51C-Rad51D-XRCC2 complex|replication fork|ATP binding|DNA binding|DNA-dependent ATPase activity|double-strand break repair via homologous recombination|reciprocal meiotic recombination	sot03440	Homologous recombination
Soltu.DM.01G004760	30.9721	32.5664	29.3779	0.900947	-0.150485	0.74451	0.851404	Down	1.6761	1.68733	1.26731	1.83351	2.12943	1.19485	102581295	XRCC2	DNA repair protein XRCC2 homolog	GO:0033063,GO:0005657,GO:0005524,GO:0003677,GO:0008094,GO:0000724,GO:0007131	Rad51B-Rad51C-Rad51D-XRCC2 complex|replication fork|ATP binding|DNA binding|DNA-dependent ATPase activity|double-strand break repair via homologous recombination|reciprocal meiotic recombination	sot03440	Homologous recombination
Soltu.DM.01G004770	41.5145	42.4434	40.5856	0.956202	-0.064612	0.881425	0.933854	Down	5.43768	7.71351	2.93148	6.37262	5.09904	5.46216
Soltu.DM.01G004780	8.11587	9.66163	6.57012	0.680301	-0.555755	0.523151	0.690643	Down	0.0882922	0.0556645	0.137967	0.161447	0.151789	0.103471		LRK10	Rust resistance kinase Lr10	GO:0016021,GO:0005886,GO:0005524,GO:0004674	integral component of membrane|plasma membrane|ATP binding|protein serine/threonine kinase activity
Soltu.DM.01G004790	3.10767	2.63038	3.58497	1.36076	0.444415	0.753228	0.857179	Up	0.0446757	0.0422492	0.146604	0.0222797	0.104734	0.0448769		LRK10	Rust resistance kinase Lr10	GO:0016021,GO:0005886,GO:0005524,GO:0004674	integral component of membrane|plasma membrane|ATP binding|protein serine/threonine kinase activity
Soltu.DM.01G004810	50.2784	50.9675	49.5892	0.974249	-0.0376382	0.926086	0.959048	Down	1.913	3.15432	2.02352	3.62033	1.79386	1.92161	102581295	XRCC2	DNA repair protein XRCC2 homolog	GO:0033063,GO:0005657,GO:0005524,GO:0003677,GO:0008094,GO:0000724,GO:0007131	Rad51B-Rad51C-Rad51D-XRCC2 complex|replication fork|ATP binding|DNA binding|DNA-dependent ATPase activity|double-strand break repair via homologous recombination|reciprocal meiotic recombination	sot03440	Homologous recombination
Soltu.DM.01G004820	6.33259	6.33045	6.33474	0.997552	-0.00353602	0.997109	0.998484	Down	0.146549	0.0554359	0.0687004	0.0730837	0.096196	0.103046		LRK10	Rust resistance kinase Lr10	GO:0016021,GO:0005886,GO:0005524,GO:0004674	integral component of membrane|plasma membrane|ATP binding|protein serine/threonine kinase activity
Soltu.DM.01G004830	28.3283	26.6571	29.9995	1.12876	0.17474	0.767704	0.866273	Up	0.183633	0.627843	0.423801	0.535373	0.132459	0.439865		LRK10	Rust resistance kinase Lr10	GO:0016021,GO:0005886,GO:0005524,GO:0004674	integral component of membrane|plasma membrane|ATP binding|protein serine/threonine kinase activity
Soltu.DM.01G004840	7.99059	10.0101	5.97107	0.595629	-0.747513	0.467013	0.642557	Down	0.142535	0.211819	0	0.121855	0.190941	0.286354	102581295	XRCC2	DNA repair protein XRCC2 homolog	GO:0033063,GO:0005657,GO:0005524,GO:0003677,GO:0008094,GO:0000724,GO:0007131	Rad51B-Rad51C-Rad51D-XRCC2 complex|replication fork|ATP binding|DNA binding|DNA-dependent ATPase activity|double-strand break repair via homologous recombination|reciprocal meiotic recombination	sot03440	Homologous recombination
Soltu.DM.01G004850	4.42643	2.29152	6.56134	2.84606	1.50897	0.219167	0.387911	Up	0.363204	0.549563	0.476742	0.0724514	0.340585	0.0729678	102580954
Soltu.DM.01G004860	3.32133	4.04027	2.60239	0.647544	-0.626949	0.640489	0.779556	Down	0.0135169	0.0383484	0.0506926	0.0674086	0.0253504	0.067889		LRK10	Rust resistance kinase Lr10	GO:0016021,GO:0005886,GO:0005524,GO:0004674	integral component of membrane|plasma membrane|ATP binding|protein serine/threonine kinase activity
Soltu.DM.01G004870	9.97964	8.67106	11.2882	1.29969	0.378171	0.642086	0.780807	Up	0.611466	0.180705	0.465802	0.228702	0.32253	0.422275
Soltu.DM.01G004880	20.6678	20.8598	20.4759	0.982487	-0.0254897	0.967874	0.982965	Down	0.415241	0.16362	0.454206	0.603981	0.194691	0.260694		XRCC2	DNA repair protein XRCC2 homolog	GO:0033063,GO:0005657,GO:0005524,GO:0003677,GO:0008094,GO:0000724,GO:0007131	Rad51B-Rad51C-Rad51D-XRCC2 complex|replication fork|ATP binding|DNA binding|DNA-dependent ATPase activity|double-strand break repair via homologous recombination|reciprocal meiotic recombination
Soltu.DM.01G004890	7.22992	7.53725	6.92259	0.915067	-0.128051	0.894904	0.941709	Down	0.951593	0.899909	0.892189	0.54235	2.03962	0.409662
Soltu.DM.01G004900	9.22941	10.9707	7.48817	0.683926	-0.548089	0.541393	0.70461	Down	0.257187	0.182414	0.964529	0.83368	0.844098	0.387518		LRK10	Rust resistance kinase Lr10	GO:0016021,GO:0005886,GO:0005524,GO:0004674	integral component of membrane|plasma membrane|ATP binding|protein serine/threonine kinase activity
Soltu.DM.01G004910	2.47938	2.93785	2.0209	0.682447	-0.551212	0.757959	0.859559	Down	0.339855	0.160698	0	0.169484	0.557708	0	102598051	LRK10	Rust resistance kinase Lr10	GO:0016021,GO:0005886,GO:0005524,GO:0004674	integral component of membrane|plasma membrane|ATP binding|protein serine/threonine kinase activity
Soltu.DM.01G004920	2.15892	2.70121	1.61663	0.602775	-0.730309	0.674515	0.804011	Down	0	0.0512282	0.0338592	0.0900487	0.0169323	0.0362762	102587903
Soltu.DM.01G004930	15.98	19.3791	12.581	0.648528	-0.624759	0.332996	0.517642	Down	0.309629	0.273291	0.17418	0.55588	0.367773	0.248818		LRK10	Rust resistance kinase Lr10	GO:0016021,GO:0005886,GO:0005524,GO:0004674	integral component of membrane|plasma membrane|ATP binding|protein serine/threonine kinase activity
Soltu.DM.01G004940	7.91982	6.36721	9.47242	1.49177	0.577029	0.51804	0.686134	Up	0.131254	0.144813	0.328162	0.17455	0.102567	0.131845	102587279	LRK10	Rust resistance kinase Lr10	GO:0016021,GO:0005886,GO:0005524,GO:0004674	integral component of membrane|plasma membrane|ATP binding|protein serine/threonine kinase activity
Soltu.DM.01G004950	12.5042	8.92406	16.0844	1.79525	0.844184	0.327614	0.511959	Up	0.785977	0.451282	0.0789548	0.0839923	0.368515	0.28197	102581295	XRCC2	DNA repair protein XRCC2 homolog	GO:0033063,GO:0005657,GO:0005524,GO:0003677,GO:0008094,GO:0000724,GO:0007131	Rad51B-Rad51C-Rad51D-XRCC2 complex|replication fork|ATP binding|DNA binding|DNA-dependent ATPase activity|double-strand break repair via homologous recombination|reciprocal meiotic recombination	sot03440	Homologous recombination
Soltu.DM.01G004980	10.0371	7.09536	12.9789	1.83202	0.873433	0.304275	0.48619	Up	0.690966	0.378306	0.306868	0.326447	0.0682038	0.365304	107058610
Soltu.DM.01G005000	1756.86	1837.85	1675.87	0.912086	-0.132759	0.18049	0.340629	Down	37.9971	41.276	42.8673	49.3422	40.3659	45.1489		RPT6A	26S proteasome regulatory subunit 8 homolog A	GO:0005829,GO:0031597,GO:0031595,GO:0005634,GO:0005886,GO:0000502,GO:0008540,GO:0005524,GO:0016787,GO:0017025,GO:0045899,GO:0030163	cytosol|cytosolic proteasome complex|nuclear proteasome complex|nucleus|plasma membrane|proteasome complex|proteasome regulatory particle, base subcomplex|ATP binding|hydrolase activity|TBP-class protein binding|positive regulation of RNA polymerase II transcriptional preinitiation complex assembly|protein catabolic process
Soltu.DM.01G005010	2125.45	2127.26	2123.65	0.99809	-0.00275855	0.981085	0.989704	Down	73.6932	57.8812	64.1724	67.2893	73.4914	56.4	102583713	RPT6A	26S proteasome regulatory subunit 8 homolog A	GO:0005829,GO:0031597,GO:0031595,GO:0005634,GO:0005886,GO:0000502,GO:0008540,GO:0005524,GO:0016787,GO:0017025,GO:0045899,GO:0030163	cytosol|cytosolic proteasome complex|nuclear proteasome complex|nucleus|plasma membrane|proteasome complex|proteasome regulatory particle, base subcomplex|ATP binding|hydrolase activity|TBP-class protein binding|positive regulation of RNA polymerase II transcriptional preinitiation complex assembly|protein catabolic process	sot03050	Proteasome
Soltu.DM.01G005020	6.92039	3.30809	10.5327	3.16601	1.66267	0.156613	0.307999	Up	1.24957	0.13635	0.0901202	0.047935	0.225336	0.193107	102588226	XRCC2	DNA repair protein XRCC2 homolog	GO:0033063,GO:0005657,GO:0005524,GO:0003677,GO:0008094,GO:0000724,GO:0007131	Rad51B-Rad51C-Rad51D-XRCC2 complex|replication fork|ATP binding|DNA binding|DNA-dependent ATPase activity|double-strand break repair via homologous recombination|reciprocal meiotic recombination	sot03440	Homologous recombination
Soltu.DM.01G005030	831.49	842.318	820.662	0.974637	-0.0370634	0.746901	0.853014	Down	13.2596	16.1146	14.7488	15.5978	14.1805	15.8201	102584059	PAR	Phenylacetaldehyde reductase
Soltu.DM.01G005040	825.64	782.135	869.145	1.11149	0.152489	0.195916	0.359275	Up	12.6983	12.4049	14.2343	13.238	11.2233	11.1649	102585033	PAR	Phenylacetaldehyde reductase
Soltu.DM.01G005050	1197.38	1343.65	1051.1	0.782387	-0.354046	0.00151603	0.00688233	Down	21.3537	18.8175	23.5491	28.2038	24.6837	29.1358	102584718	PAR	Phenylacetaldehyde reductase
Soltu.DM.01G005060	3611.96	1823.38	5400.54	2.96163	1.56639	1.75e-59	3.23e-57	Up	77.47	74.5599	80.2694	22.455	27.2404	29.2691	102584378		Probable NAD kinase 1	GO:0005524,GO:0003951,GO:0019674,GO:0006741	ATP binding|NAD+ kinase activity|NAD metabolic process|NADP biosynthetic process	sot00760	Nicotinate and nicotinamide metabolism
Soltu.DM.01G005070	9.76296	8.60695	10.919	1.2654	0.339596	0.687083	0.813149	Up	0.181833	0.243606	0.0568274	0.105793	0.184719	0.0913259	102585361	LRK10	Rust resistance kinase Lr10	GO:0016021,GO:0005886,GO:0005524,GO:0004674	integral component of membrane|plasma membrane|ATP binding|protein serine/threonine kinase activity
Soltu.DM.01G005080	2.00312	3.66331	0.342926	0.0966558	-3.371	0.101205	0.223394	Down	0.0162666	0	0	0.0162242	0.0610142	0.0980387	102586943	LRK10	Rust resistance kinase Lr10	GO:0016021,GO:0005886,GO:0005524,GO:0004674	integral component of membrane|plasma membrane|ATP binding|protein serine/threonine kinase activity
Soltu.DM.01G005100	10.1765	6.99179	13.3612	1.91338	0.936123	0.245906	0.419681	Up	0.211465	0.566609	0.594793	0.175762	0.264395	0.283223	107062730
Soltu.DM.01G005110	41.4179	34.2499	48.586	1.41829	0.504151	0.205623	0.371357	Up	1.27303	1.47477	1.76051	0.825316	1.25344	1.11892	107058973
Soltu.DM.01G005140	812.755	853.292	772.217	0.905157	-0.14376	0.303645	0.485403	Down	6.50579	9.46843	8.31496	8.25363	9.82375	8.93019	102586367		Zinc finger CCCH domain-containing protein 53	GO:0003677,GO:0046872,GO:0003723	DNA binding|metal ion binding|RNA binding
Soltu.DM.01G005270	3.5757	1.61246	5.53893	3.40333	1.76695	0.258018	0.433932	Up	0.0380637	0.179982	0.0892189	0	0.0892332	0		CYP71D55	Premnaspirodiene oxygenase	GO:0016021,GO:0020037,GO:0005506,GO:0004497,GO:0016705	integral component of membrane|heme binding|iron ion binding|monooxygenase activity|oxidoreductase activity, acting on paired donors, with incorporation or reduction of molecular oxygen
Soltu.DM.01G005290	1076.62	1330.75	822.477	0.617988	-0.69435	7.73e-09	9.47e-08	Down	14.9666	12.0186	14.0323	25.249	20.8193	20.7212		CYP71D55	Premnaspirodiene oxygenase	GO:0016021,GO:0020037,GO:0005506,GO:0004497,GO:0016705	integral component of membrane|heme binding|iron ion binding|monooxygenase activity|oxidoreductase activity, acting on paired donors, with incorporation or reduction of molecular oxygen
Soltu.DM.01G005300	473.142	587.398	358.886	0.61081	-0.711204	0.000118013	0.00070423	Down	9.12397	5.27178	8.39107	14.5516	11.4962	11.4837		CYP71D55	Premnaspirodiene oxygenase	GO:0016021,GO:0020037,GO:0005506,GO:0004497,GO:0016705	integral component of membrane|heme binding|iron ion binding|monooxygenase activity|oxidoreductase activity, acting on paired donors, with incorporation or reduction of molecular oxygen
Soltu.DM.01G005320	3.34201	0	6.68403	36.2371	5.17939	0.00419626	0.0166495	Up	0.287569	0.148337	0.0735321	0	0	0		CYP71D55	Premnaspirodiene oxygenase	GO:0016021,GO:0020037,GO:0005506,GO:0004497,GO:0016705	integral component of membrane|heme binding|iron ion binding|monooxygenase activity|oxidoreductase activity, acting on paired donors, with incorporation or reduction of molecular oxygen
Soltu.DM.01G005330	135.159	159.11	111.208	0.698197	-0.518293	0.0307581	0.0875706	Down	2.10051	1.76069	1.298	2.46008	2.49197	2.47761		CYP71D55	Premnaspirodiene oxygenase	GO:0016021,GO:0020037,GO:0005506,GO:0004497,GO:0016705	integral component of membrane|heme binding|iron ion binding|monooxygenase activity|oxidoreductase activity, acting on paired donors, with incorporation or reduction of molecular oxygen
Soltu.DM.01G005340	173.868	209.776	137.959	0.658039	-0.603755	0.0101308	0.0352365	Down	4.67146	3.92688	5.32069	9.04246	5.35399	6.91708		CYP71D55	Premnaspirodiene oxygenase	GO:0016021,GO:0020037,GO:0005506,GO:0004497,GO:0016705	integral component of membrane|heme binding|iron ion binding|monooxygenase activity|oxidoreductase activity, acting on paired donors, with incorporation or reduction of molecular oxygen
Soltu.DM.01G005350	16.6364	19.0974	14.1754	0.742627	-0.42929	0.52767	0.694085	Down	0.458476	0.28905	0.515827	1.00602	0.458586	0.245622		CYP71D55	Premnaspirodiene oxygenase	GO:0016021,GO:0020037,GO:0005506,GO:0004497,GO:0016705	integral component of membrane|heme binding|iron ion binding|monooxygenase activity|oxidoreductase activity, acting on paired donors, with incorporation or reduction of molecular oxygen
Soltu.DM.01G005360	156.023	219.923	92.1229	0.419432	-1.25349	1.46e-05	0.000105059	Down	1.01852	1.29345	1.59612	4.60044	2.04663	2.74778	102594554	CYP71D55	Premnaspirodiene oxygenase	GO:0016021,GO:0020037,GO:0005506,GO:0004497,GO:0016705	integral component of membrane|heme binding|iron ion binding|monooxygenase activity|oxidoreductase activity, acting on paired donors, with incorporation or reduction of molecular oxygen
Soltu.DM.01G005380	580.601	656.866	504.336	0.76752	-0.381724	0.00170118	0.00760239	Down	8.99615	8.13483	8.06505	10.4596	11.2961	11.2743	102601387	CPR1	F-box protein CPR1	GO:0005737,GO:0005634,GO:0031348,GO:0042177,GO:0009626,GO:0016567	cytoplasm|nucleus|negative regulation of defense response|negative regulation of protein catabolic process|plant-type hypersensitive response|protein ubiquitination
Soltu.DM.01G005390	86.7784	79.3644	94.1924	1.18652	0.246736	0.443333	0.622613	Up	1.14073	1.27491	1.65289	0.694473	1.43088	1.32444		CYP71D55	Premnaspirodiene oxygenase	GO:0016021,GO:0020037,GO:0005506,GO:0004497,GO:0016705	integral component of membrane|heme binding|iron ion binding|monooxygenase activity|oxidoreductase activity, acting on paired donors, with incorporation or reduction of molecular oxygen
Soltu.DM.01G005400	35.3801	35.1838	35.5765	1.01201	0.0172268	0.968552	0.983289	Up	0.626659	0.460929	0.718104	0.590302	0.440725	0.769365	102603857	CYP71D55	Premnaspirodiene oxygenase	GO:0016021,GO:0020037,GO:0005506,GO:0004497,GO:0016705	integral component of membrane|heme binding|iron ion binding|monooxygenase activity|oxidoreductase activity, acting on paired donors, with incorporation or reduction of molecular oxygen	sot00909	Sesquiterpenoid and triterpenoid biosynthesis
Soltu.DM.01G005430	12.6049	7.41785	17.7919	2.39915	1.26253	0.125272	0.262573	Up	0.529817	0.117892	0.160711	0.13988	0.0438373	0.15653	102603519	CYP71D55	Premnaspirodiene oxygenase	GO:0016021,GO:0020037,GO:0005506,GO:0004497,GO:0016705	integral component of membrane|heme binding|iron ion binding|monooxygenase activity|oxidoreductase activity, acting on paired donors, with incorporation or reduction of molecular oxygen	sot00909	Sesquiterpenoid and triterpenoid biosynthesis
Soltu.DM.01G005440	177.965	222.112	133.818	0.602191	-0.731707	0.000268557	0.00148253	Down	5.82958	5.06706	5.82736	9.02085	10.29	8.61151	102586504
Soltu.DM.01G005470	1.8269	1.28997	2.36383	1.81316	0.858505	0.692604	0.816997	Up	0.184417	0.0697604	0	0	0.138346	0	107059229	CYP71D55	Premnaspirodiene oxygenase	GO:0016021,GO:0020037,GO:0005506,GO:0004497,GO:0016705	integral component of membrane|heme binding|iron ion binding|monooxygenase activity|oxidoreductase activity, acting on paired donors, with incorporation or reduction of molecular oxygen
Soltu.DM.01G005480	32.1983	21.2134	43.1832	2.03166	1.02266	0.0276405	0.0803251	Up	0.630486	0.665572	0.549886	0.190115	0.41248	0.309298	102603243	GONST1	GDP-mannose transporter GONST1	GO:0005794,GO:0000139,GO:0016021,GO:0015297,GO:0005457,GO:0005458,GO:0005338,GO:0008643,GO:0015783,GO:1990570	Golgi apparatus|Golgi membrane|integral component of membrane|antiporter activity|GDP-fucose transmembrane transporter activity|GDP-mannose transmembrane transporter activity|nucleotide-sugar transmembrane transporter activity|carbohydrate transport|GDP-fucose transmembrane transport|GDP-mannose transmembrane transport
Soltu.DM.01G005490	300.999	327.057	274.94	0.84097	-0.249875	0.130111	0.269341	Down	4.25534	5.31897	5.256	6.14494	6.159	5.44534		MOC1	Holliday junction resolvase MOC1, chloroplastic	GO:0042644,GO:0008821,GO:0000400,GO:0046872,GO:0006310,GO:0090143	chloroplast nucleoid|crossover junction endodeoxyribonuclease activity|four-way junction DNA binding|metal ion binding|DNA recombination|nucleoid organization
Soltu.DM.01G005530	492.992	516.769	469.214	0.907637	-0.139813	0.292243	0.473027	Down	11.5936	11.2233	11.2907	11.7126	13.9578	12.1217	102587633	TGA2.2	Transcription factor TGA2.2	GO:0005634,GO:0003700,GO:0043565,GO:0006952,GO:0006351	nucleus|DNA-binding transcription factor activity|sequence-specific DNA binding|defense response|transcription, DNA-templated	sot04075	Plant hormone signal transduction
Soltu.DM.01G005540	95.7227	99.7673	91.6781	0.918681	-0.122364	0.637351	0.777386	Down	9.82964	9.39465	8.72581	9.17824	10.002	11.4495	102602554	TGA2.3	Transcription factor TGA2.3	GO:0005634,GO:0003700,GO:0043565,GO:0006952,GO:0006351	nucleus|DNA-binding transcription factor activity|sequence-specific DNA binding|defense response|transcription, DNA-templated
Soltu.DM.01G005560	1143.68	1288.77	998.592	0.774691	-0.368308	0.00114072	0.00537014	Down	20.4026	21.0981	16.3351	24.2925	25.2983	25.5433	102581829		Mediator-associated protein 2	GO:0016592,GO:0005730	mediator complex|nucleolus
Soltu.DM.01G005570	1273.3	1378.86	1167.74	0.846801	-0.239905	0.0114631	0.0390816	Down	8.92659	9.05854	8.76718	10.7608	11.0307	9.99291	102581270	ROPGAP7	Rho GTPase-activating protein 7	GO:0009535,GO:0005737,GO:0005886,GO:0005096,GO:0009920,GO:0007165	chloroplast thylakoid membrane|cytoplasm|plasma membrane|GTPase activator activity|cell plate formation involved in plant-type cell wall biogenesis|signal transduction
Soltu.DM.01G005580	285.534	338.402	232.666	0.687675	-0.540202	0.00297693	0.0123598	Down	4.38722	5.16182	4.42232	8.07362	6.76009	5.60699	102580693
Soltu.DM.01G005590	640.474	786.36	494.588	0.628977	-0.668921	7.94e-07	7.08e-06	Down	6.66217	8.28457	7.13656	10.4637	13.1121	11.7536	102580356	NPC2	Non-specific phospholipase C2	GO:0005576,GO:0003993,GO:0009395	extracellular region|acid phosphatase activity|phospholipid catabolic process	sot00562,sot00564,sot00565	Inositol phosphate metabolism|Glycerophospholipid metabolism|Ether lipid metabolism
Soltu.DM.01G005600	293.998	293.436	294.56	1.00435	0.00625578	0.972573	0.985507	Up	5.93172	7.58445	5.56143	7.11281	5.31233	6.71718
Soltu.DM.01G005610	7.82227	5.96021	9.68433	1.61772	0.693963	0.452935	0.630366	Up	0.502491	0.1782	0.206116	0.187943	0.265049	0.0946414	102579503
Soltu.DM.01G005620	2.20112	2.00175	2.40048	1.1914	0.252663	0.894483	0.941427	Up	0.339855	0	0	0.0484241	0.0910543	0.146308
Soltu.DM.01G005630	1124.81	933.534	1316.08	1.40982	0.495515	1.31e-06	1.12e-05	Up	19.6771	19.257	19.5491	15.2324	13.6208	12.8913	102579178	SPP	Signal peptide peptidase	GO:0005783,GO:0005789,GO:0071458,GO:0071556,GO:0042500,GO:0033619,GO:0009555,GO:0009846,GO:0006465	endoplasmic reticulum|endoplasmic reticulum membrane|integral component of cytoplasmic side of endoplasmic reticulum membrane|integral component of lumenal side of endoplasmic reticulum membrane|aspartic endopeptidase activity, intramembrane cleaving|membrane protein proteolysis|pollen development|pollen germination|signal peptide processing
Soltu.DM.01G005640	2.45577	3.29172	1.61981	0.493353	-1.01931	0.544677	0.707075	Down	0	0.0552091	0.0136839	0.014557	0.0821165	0.0439821	102583165	AAO	L-ascorbate oxidase	GO:0005576,GO:0005507,GO:0008447	extracellular region|copper ion binding|L-ascorbate oxidase activity	sot00053	Ascorbate and aldarate metabolism
Soltu.DM.01G005650	2352.63	2517.5	2187.75	0.869041	-0.202505	0.0200195	0.0617621	Down	34.0947	34.6888	34.9708	43.14	39.8423	37.1567	102578848	CSN2	COP9 signalosome complex subunit 2	GO:0008180,GO:0005829,GO:0005634,GO:0003714,GO:0007275,GO:0045892,GO:0030163,GO:0000338,GO:0009585	COP9 signalosome|cytosol|nucleus|transcription corepressor activity|multicellular organism development|negative regulation of transcription, DNA-templated|protein catabolic process|protein deneddylation|red, far-red light phototransduction
Soltu.DM.01G005660	5280.04	4882.73	5677.34	1.16278	0.217576	0.00586425	0.0222007	Up	59.6848	62.8995	60.5651	57.2337	51.3817	49.9057	102578501	CIPK3	CBL-interacting serine/threonine-protein kinase 3	GO:0005524,GO:0004674,GO:0007165	ATP binding|protein serine/threonine kinase activity|signal transduction
Soltu.DM.01G005760	289.777	349.734	229.82	0.657053	-0.605918	0.00113684	0.00535595	Down	22.2038	25.4457	25.6376	37.0918	45.1295	29.8849	102606272
Soltu.DM.01G005770	186.27	205.851	166.689	0.809162	-0.305499	0.122834	0.258747	Down	3.06838	2.42078	2.74968	3.14492	3.70392	3.38871	102605932		D-cysteine desulfhydrase 2, mitochondrial	GO:0005739,GO:0019148,GO:0080146,GO:0009093	mitochondrion|D-cysteine desulfhydrase activity|L-cysteine desulfhydrase activity|cysteine catabolic process	sot00270,sot00470	Cysteine and methionine metabolism|D-Amino acid metabolism
Soltu.DM.01G005780	409.473	434.698	384.247	0.884142	-0.177649	0.212474	0.379603	Down	4.05427	4.42392	4.95952	4.91704	5.309	5.07258	102605596	SCL3	Scarecrow-like protein 3	GO:0005634,GO:0003700,GO:0043565,GO:0003712,GO:0006355,GO:0009739	nucleus|DNA-binding transcription factor activity|sequence-specific DNA binding|transcription coregulator activity|regulation of transcription, DNA-templated|response to gibberellin
Soltu.DM.01G005800	161.017	138.006	184.027	1.33234	0.413962	0.0771475	0.181957	Up	3.32858	2.42465	2.29139	2.303	2.1371	1.6266	102605263		Uncharacterized protein At2g37660, chloroplastic	GO:0048046,GO:0009507,GO:0009570,GO:0009579,GO:0005507,GO:0042742	apoplast|chloroplast|chloroplast stroma|thylakoid|copper ion binding|defense response to bacterium
Soltu.DM.01G005810	567.613	637.946	497.28	0.779221	-0.359895	0.0159365	0.0512672	Down	9.51593	7.55134	8.1553	12.3367	11.2072	8.99958	102604691	HY2	Phytochromobilin:ferredoxin oxidoreductase, chloroplastic	GO:0009507,GO:0050897,GO:0050619,GO:0010019,GO:0010024	chloroplast|cobalt ion binding|phytochromobilin:ferredoxin oxidoreductase activity|chloroplast-nucleus signaling pathway|phytochromobilin biosynthetic process	sot00860	Porphyrin metabolism
Soltu.DM.01G005820	7574.31	10166.5	4982.15	0.490038	-1.02904	3.16e-49	4.26e-47	Down	111.624	103.699	106.129	214.168	216.256	229.922	107057962		F-box protein At4g18380
Soltu.DM.01G005830	12.171	10.2781	14.0638	1.36815	0.452224	0.601723	0.751026	Up	0.622538	2.43901	0.583675	0.177404	1.16754	1.34002
Soltu.DM.01G005840	9952.73	10423.6	9481.9	0.909624	-0.136657	0.0469309	0.123214	Down	310.648	285.671	284.475	321.152	324.885	328.562	102577873	CAM	Calmodulin	GO:0005509	calcium ion binding	sot04016,sot04070,sot04626	MAPK signaling pathway - plant|Phosphatidylinositol signaling system|Plant-pathogen interaction
Soltu.DM.01G005850	20347.5	21180.6	19514.4	0.921315	-0.118233	0.0933195	0.210491	Down	175.971	177.329	162.149	186.573	194.705	181.705	102604021	AGO4	Protein argonaute 4	GO:0015030,GO:0005719,GO:0005730,GO:0005654,GO:0003682,GO:0004521,GO:0035198,GO:0035197,GO:0006342,GO:0031048,GO:0009816,GO:0051607,GO:0006306,GO:0016458,GO:0051567,GO:0019048,GO:0070919,GO:0030422,GO:0006417,GO:0080188	Cajal body|nuclear euchromatin|nucleolus|nucleoplasm|chromatin binding|endoribonuclease activity|miRNA binding|siRNA binding|chromatin silencing|chromatin silencing by small RNA|defense response to bacterium, incompatible interaction|defense response to virus|DNA methylation|gene silencing|histone H3-K9 methylation|modulation by virus of host morphology or physiology|production of siRNA involved …
Soltu.DM.01G005860	19801.9	22152.1	17451.7	0.787795	-0.344108	2.5e-06	2.06e-05	Down	119.042	120.009	109.019	145.847	155.918	142.811	102603011	UBA2A	UBP1-associated protein 2A	GO:0005829,GO:0005634,GO:0017091,GO:0003729,GO:0009738,GO:0008219,GO:0006952,GO:0009693,GO:0010150,GO:0048255	cytosol|nucleus|AU-rich element binding|mRNA binding|abscisic acid-activated signaling pathway|cell death|defense response|ethylene biosynthetic process|leaf senescence|mRNA stabilization	sot03040	Spliceosome
Soltu.DM.01G005870	493.817	543.848	443.786	0.816174	-0.293051	0.0368337	0.101455	Down	4.9886	5.56441	4.49184	6.41376	5.47394	6.68141	102597187	DPBF3	ABSCISIC ACID-INSENSITIVE 5-like protein 2	GO:0005634,GO:0003700,GO:0043565,GO:0009738,GO:0009737	nucleus|DNA-binding transcription factor activity|sequence-specific DNA binding|abscisic acid-activated signaling pathway|response to abscisic acid	sot04075	Plant hormone signal transduction
Soltu.DM.01G005880	818.547	779.478	857.615	1.10009	0.137625	0.200174	0.364598	Up	19.7916	18.4179	18.2176	16.4763	16.9085	18.2486	102602117	THO7A	THO complex subunit 7A	GO:0000347,GO:0000445,GO:0003723,GO:0006406,GO:0006397,GO:0008380	THO complex|THO complex part of transcription export complex|RNA binding|mRNA export from nucleus|mRNA processing|RNA splicing	sot03013	Nucleocytoplasmic transport
Soltu.DM.01G005890	4101.85	4510.3	3693.4	0.818898	-0.288245	0.000100064	0.000605018	Down	74.8404	70.9115	75.4061	90.4184	86.6076	94.8795	102601784	RHC1A	Probable E3 ubiquitin-protein ligase RHC1A	GO:0005618,GO:0005737,GO:0005634,GO:0046872,GO:0061630,GO:0009938,GO:0016567,GO:0009651,GO:0006511	cell wall|cytoplasm|nucleus|metal ion binding|ubiquitin protein ligase activity|negative regulation of gibberellic acid mediated signaling pathway|protein ubiquitination|response to salt stress|ubiquitin-dependent protein catabolic process
Soltu.DM.01G005900	851.076	730.219	971.933	1.33109	0.412609	0.00024035	0.00133921	Up	16.0354	15.0331	18.1095	12.6183	12.4493	12.1155	102601451	ISPE	4-diphosphocytidyl-2-C-methyl-D-erythritol kinase, chloroplastic/chromoplastic	GO:0009507,GO:0009509,GO:0050515,GO:0005524,GO:0019288,GO:0016114	chloroplast|chromoplast|4-(cytidine 5'-diphospho)-2-C-methyl-D-erythritol kinase activity|ATP binding|isopentenyl diphosphate biosynthetic process, methylerythritol 4-phosphate pathway|terpenoid biosynthetic process	sot00900	Terpenoid backbone biosynthesis
Soltu.DM.01G005910	4181.58	4242.77	4120.39	0.971174	-0.0421987	0.566179	0.72406	Down	101.383	109.837	106.023	107.335	111.438	110.01	102601109		Cysteine proteinase inhibitor	GO:0004869	cysteine-type endopeptidase inhibitor activity
Soltu.DM.01G005920	1276.78	1324.72	1228.84	0.92771	-0.108254	0.289553	0.470306	Down	12.6161	14.1502	11.7983	14.3226	13.1528	14.3814	102600764	DGS1	Protein DGS1, mitochondrial	GO:0016021,GO:0005741,GO:0005739,GO:0019375,GO:0050665	integral component of membrane|mitochondrial outer membrane|mitochondrion|galactolipid biosynthetic process|hydrogen peroxide biosynthetic process
Soltu.DM.01G005930	1.2984	0	2.59679	14.1145	3.8191	0.195806	0.359128	Up	0	0.117379	0	0	0	0	102600441		G2/mitotic-specific cyclin-2	GO:0005634,GO:0007049,GO:0051301	nucleus|cell cycle|cell division
Soltu.DM.01G005940	1573.32	1711.73	1434.91	0.838224	-0.254593	0.00457276	0.0179187	Down	17.1663	17.7055	17.6242	19.9251	22.1338	20.9621	102599886	CNX1	Molybdopterin adenylyltransferase	GO:0005737,GO:0005829,GO:0005524,GO:0030151,GO:0061598,GO:0061599,GO:0008940,GO:0009734,GO:0006777,GO:0018315,GO:0032324,GO:0010038	cytoplasm|cytosol|ATP binding|molybdenum ion binding|molybdopterin adenylyltransferase activity|molybdopterin molybdotransferase activity|nitrate reductase activity|auxin-activated signaling pathway|Mo-molybdopterin cofactor biosynthetic process|molybdenum incorporation into molybdenum-molybdopterin complex|molybdopterin cofactor biosynthetic process|response to metal ion	sot00790	Folate biosynthesis
Soltu.DM.01G005950	1429.09	1549.43	1308.76	0.844666	-0.243547	0.00649689	0.0242279	Down	18.1177	17.6314	17.1035	21.6624	20.0937	21.2324	102599562	BPM4	BTB/POZ and MATH domain-containing protein 4	GO:0005829,GO:0071472,GO:0042631,GO:0016567,GO:0006970	cytosol|cellular response to salt stress|cellular response to water deprivation|protein ubiquitination|response to osmotic stress
Soltu.DM.01G005960	429.74	468.659	390.822	0.83341	-0.262902	0.104233	0.228403	Down	4.28951	3.57054	4.09057	4.09004	5.80246	4.51952	102599237	GAM1	Transcription factor GAMYB	GO:0005634,GO:0003677,GO:0030154,GO:0009908,GO:0006355	nucleus|DNA binding|cell differentiation|flower development|regulation of transcription, DNA-templated
Soltu.DM.01G005970	25.4012	13.6447	37.1576	2.71793	1.44251	0.00608742	0.0229085	Up	1.44359	0.919412	0.828659	0.293843	0.442022	0.443906	102598914
Soltu.DM.01G005980	8183.56	9370.93	6996.19	0.746556	-0.421679	1.48e-08	1.74e-07	Down	69.5282	65.9701	60.6262	89.6111	85.4223	89.4095	102598346	SE	Serrate RNA effector molecule	GO:0009507,GO:0005829,GO:0005846,GO:0010445,GO:0016607,GO:0005730,GO:0005634,GO:0003677,GO:0003700,GO:0046872,GO:0006397,GO:0031053,GO:0010267,GO:2000011,GO:0000381,GO:0048509,GO:0006355,GO:0008380,GO:0048367	chloroplast|cytosol|nuclear cap binding complex|nuclear dicing body|nuclear speck|nucleolus|nucleus|DNA binding|DNA-binding transcription factor activity|metal ion binding|mRNA processing|primary miRNA processing|production of ta-siRNAs involved in RNA interference|regulation of adaxial/abaxial pattern formation|regulation of alternative mRNA splicing, via spliceosome|regulation of meristem devel…
Soltu.DM.01G006010	1057.05	1002.94	1111.16	1.10796	0.147909	0.167862	0.3236	Up	38.9757	46.4953	42.9738	38.5182	40.8614	37.2792	102599049	RPL30	60S ribosomal protein L30	GO:0005840,GO:0003723,GO:0003735,GO:0006412	ribosome|RNA binding|structural constituent of ribosome|translation	sot03010	Ribosome
Soltu.DM.01G006080	6.26806	6.62156	5.91456	0.892479	-0.16411	0.885485	0.936467	Down	0.439197	0	0.82356	0.438052	0.68641	0.294116	102589749	HDA14	Histone deacetylase 14	GO:0009507,GO:0005829,GO:0005634,GO:0043014,GO:0048487,GO:0032041,GO:0051721,GO:0043621,GO:0042903,GO:0090042	chloroplast|cytosol|nucleus|alpha-tubulin binding|beta-tubulin binding|NAD-dependent histone deacetylase activity (H3-K14 specific)|protein phosphatase 2A binding|protein self-association|tubulin deacetylase activity|tubulin deacetylation
Soltu.DM.01G006090	139.21	152.987	125.434	0.819711	-0.286813	0.234756	0.406532	Down	0.794582	0.51897	0.777137	0.969259	0.798704	0.79816	102590079	HDA14	Histone deacetylase 14	GO:0009507,GO:0005829,GO:0005634,GO:0043014,GO:0048487,GO:0032041,GO:0051721,GO:0043621,GO:0042903,GO:0090042	chloroplast|cytosol|nucleus|alpha-tubulin binding|beta-tubulin binding|NAD-dependent histone deacetylase activity (H3-K14 specific)|protein phosphatase 2A binding|protein self-association|tubulin deacetylase activity|tubulin deacetylation
Soltu.DM.01G006160	420.6	422.761	418.439	0.989997	-0.0145045	0.917498	0.95415	Down	7.95392	7.77459	9.34583	8.36368	8.38369	8.75361	102589749	HDA14	Histone deacetylase 14	GO:0009507,GO:0005829,GO:0005634,GO:0043014,GO:0048487,GO:0032041,GO:0051721,GO:0043621,GO:0042903,GO:0090042	chloroplast|cytosol|nucleus|alpha-tubulin binding|beta-tubulin binding|NAD-dependent histone deacetylase activity (H3-K14 specific)|protein phosphatase 2A binding|protein self-association|tubulin deacetylase activity|tubulin deacetylation
Soltu.DM.01G006190	205.766	165.172	246.361	1.49059	0.575886	0.00249494	0.0106157	Up	5.827	4.78433	5.61148	3.49159	4.02397	3.42573	102589420
Soltu.DM.01G006200	10473.4	11996.7	8950.11	0.746097	-0.422565	1.18e-06	1.02e-05	Down	189.992	213.964	234.923	302.048	266.552	293.551	102589097	NHL13	NDR1/HIN1-like protein 13	GO:0016021,GO:0005886,GO:0009506,GO:0042742	integral component of membrane|plasma membrane|plasmodesma|defense response to bacterium
Soltu.DM.01G006210	23028.8	23279.1	22778.5	0.978474	-0.0313945	0.713141	0.830361	Down	253.773	264.663	230.31	250.458	282.036	237.282	102588768	EIN3	Protein ETHYLENE INSENSITIVE 3	GO:0005634,GO:0003677,GO:0003700,GO:0019900,GO:0044212,GO:0000976,GO:0071281,GO:0042742,GO:0009873,GO:0006355,GO:0009723,GO:0001666,GO:0010182	nucleus|DNA binding|DNA-binding transcription factor activity|kinase binding|transcription regulatory region DNA binding|transcription regulatory region sequence-specific DNA binding|cellular response to iron ion|defense response to bacterium|ethylene-activated signaling pathway|regulation of transcription, DNA-templated|response to ethylene|response to hypoxia|sugar mediated signaling pathway	sot04016,sot04075	MAPK signaling pathway - plant|Plant hormone signal transduction
Soltu.DM.01G006220	1528.16	1528.57	1527.75	0.999677	-0.000465915	0.995968	0.998207	Down	12.8266	14.4563	13.9074	14.2229	13.1378	14.1292	102588440	METE	5-methyltetrahydropteroyltriglutamate--homocysteine methyltransferase	GO:0005737,GO:0003871,GO:0008270,GO:0009086	cytoplasm|5-methyltetrahydropteroyltriglutamate-homocysteine S-methyltransferase activity|zinc ion binding|methionine biosynthetic process	sot00270,sot00450	Cysteine and methionine metabolism|Selenocompound metabolism
Soltu.DM.01G006270	538.356	491.174	585.538	1.19171	0.253035	0.064249	0.157618	Up	3.67755	3.13003	3.83369	2.80382	3.30241	2.87389	102588119	AAO3	Abscisic-aldehyde oxidase	GO:0005829,GO:0051537,GO:0010293,GO:0004031,GO:0009055,GO:0071949,GO:0050302,GO:0005506,GO:0031625,GO:0009688,GO:0009851	cytosol|2 iron, 2 sulfur cluster binding|abscisic aldehyde oxidase activity|aldehyde oxidase activity|electron transfer activity|FAD binding|indole-3-acetaldehyde oxidase activity|iron ion binding|ubiquitin protein ligase binding|abscisic acid biosynthetic process|auxin biosynthetic process	sot00906	Carotenoid biosynthesis
Soltu.DM.01G006310	28.8407	23.6069	34.0745	1.44124	0.527308	0.292866	0.473609	Up	1.53689	1.23541	1.04469	1.11134	1.08089	0.463144	102592680
Soltu.DM.01G006320	2.25745	4.51489	0	0.0401894	-4.63704	0.0618932	0.153056	Down	0	0	0	0	0.365996	0	107059099
Soltu.DM.01G006330	13.4724	10.9516	15.9932	1.46081	0.546767	0.459665	0.636033	Up	0.159485	0.13574	0.448587	0.174976	0.224329	0.112142	107059098		Protein FAF-like, chloroplastic	GO:0009507,GO:0005737,GO:0005783,GO:0005634,GO:0019902,GO:0047485,GO:0009788,GO:0042326,GO:0010922	chloroplast|cytoplasm|endoplasmic reticulum|nucleus|phosphatase binding|protein N-terminus binding|negative regulation of abscisic acid-activated signaling pathway|negative regulation of phosphorylation|positive regulation of phosphatase activity
Soltu.DM.01G006340	16.8472	10.2084	23.486	2.29657	1.19948	0.115987	0.247601	Up	0.197563	0.420373	0.509382	0.180627	0.293327	0.0165377	107059097		Protein FAF-like, chloroplastic	GO:0009507,GO:0005737,GO:0005783,GO:0005634,GO:0019902,GO:0047485,GO:0009788,GO:0042326,GO:0010922	chloroplast|cytoplasm|endoplasmic reticulum|nucleus|phosphatase binding|protein N-terminus binding|negative regulation of abscisic acid-activated signaling pathway|negative regulation of phosphorylation|positive regulation of phosphatase activity
Soltu.DM.01G006350	1214.44	1290.36	1138.51	0.882431	-0.180445	0.0677183	0.164333	Down	13.4148	15.3462	13.4843	16.363	15.5989	16.2367	102593349	BSL3	Serine/threonine-protein phosphatase BSL3	GO:0005829,GO:0005634,GO:0005886,GO:0046872,GO:0004721,GO:0009742	cytosol|nucleus|plasma membrane|metal ion binding|phosphoprotein phosphatase activity|brassinosteroid mediated signaling pathway
Soltu.DM.01G006360	271.65	311.952	231.349	0.742172	-0.430175	0.0142521	0.0467936	Down	6.02132	7.57311	7.02098	10.487	8.16857	9.33362	102580400	BSL3	Serine/threonine-protein phosphatase BSL3	GO:0005829,GO:0005634,GO:0005886,GO:0046872,GO:0004721,GO:0009742	cytosol|nucleus|plasma membrane|metal ion binding|phosphoprotein phosphatase activity|brassinosteroid mediated signaling pathway
Soltu.DM.01G006380	660.131	703.421	616.841	0.876949	-0.189436	0.111612	0.240223	Down	6.53882	5.90725	7.02384	7.69872	7.34981	7.29686	102579213	CLPS3	Protein CLP1 homolog	GO:0005849,GO:0005634,GO:0005524,GO:0009908,GO:0006378,GO:0006397,GO:0048827,GO:0006388,GO:0010228	mRNA cleavage factor complex|nucleus|ATP binding|flower development|mRNA polyadenylation|mRNA processing|phyllome development|tRNA splicing, via endonucleolytic cleavage and ligation|vegetative to reproductive phase transition of meristem	sot03015	mRNA surveillance pathway
Soltu.DM.01G006390	781.472	858.995	703.95	0.819698	-0.286835	0.00988858	0.0345436	Down	5.59973	5.64968	5.82745	7.08723	6.36674	7.53057	102589178	NEK5	Serine/threonine-protein kinase Nek5	GO:0055028,GO:0005524,GO:0004672,GO:0004674,GO:0043622,GO:0009913,GO:0007017	cortical microtubule|ATP binding|protein kinase activity|protein serine/threonine kinase activity|cortical microtubule organization|epidermal cell differentiation|microtubule-based process
Soltu.DM.01G006400	4557.71	4631.7	4483.72	0.968015	-0.046899	0.529953	0.696013	Down	64.5742	67.5713	64.1616	67.4764	70.9313	65.6493	102589505	DWF5	7-dehydrocholesterol reductase	GO:0005794,GO:0030176,GO:0005886,GO:0047598,GO:0009918,GO:0016132,GO:0006695,GO:0016126	Golgi apparatus|integral component of endoplasmic reticulum membrane|plasma membrane|7-dehydrocholesterol reductase activity|sterol delta7 reductase activity|brassinosteroid biosynthetic process|cholesterol biosynthetic process|sterol biosynthetic process	sot00100	Steroid biosynthesis
Soltu.DM.01G006490	2.16608	0	4.33216	23.4938	4.55421	0.029066	0.0835335	Up	0.129427	0.0174853	0.0866764	0	0	0	102590484	CYP98A2	Cytochrome P450 98A2	GO:0016021,GO:0016020,GO:0020037,GO:0005506,GO:0016709,GO:0009809	integral component of membrane|membrane|heme binding|iron ion binding|oxidoreductase activity,acting on paired donors, with incorporation or reduction of molecular oxygen, NAD(P)H as one donor, and incorporation of one atom of oxygen|lignin biosynthetic process	sot00940,sot00941,sot00945	Phenylpropanoid biosynthesis|Flavonoid biosynthesis|Stilbenoid, diarylheptanoid and gingerol biosynthesis
Soltu.DM.01G006510	465.271	469.349	461.194	0.98236	-0.025676	0.852404	0.917199	Down	11.2922	12.3588	10.4684	10.7819	12.6116	11.547	102591191
Soltu.DM.01G006530	286.818	293.526	280.109	0.954178	-0.0676697	0.685127	0.811911	Down	12.4659	13.4086	12.9814	11.5792	14.545	14.8639	102591191
Soltu.DM.01G006540	311.18	299.268	323.093	1.07999	0.111015	0.501357	0.672993	Up	4.46197	4.0253	5.33938	4.33323	3.99141	4.57052	102591744		mRNA-decapping enzyme-like protein	GO:0005737,GO:0000932,GO:0008047,GO:0016787,GO:0003729,GO:0000290,GO:0031087,GO:0006952,GO:0006397	cytoplasm|P-body|enzyme activator activity|hydrolase activity|mRNA binding|deadenylation-dependent decapping of nuclear-transcribed mRNA|deadenylation-independent decapping of nuclear-transcribed mRNA|defense response|mRNA processing	sot03018	RNA degradation
Soltu.DM.01G006570	5.19375	3.69469	6.69281	1.81021	0.856153	0.505985	0.676426	Up	0.233998	0.0368815	0.109695	0	0.036571	0.176289	102592079	EIX1	Receptor-like protein EIX1	GO:0016021,GO:0005886,GO:0050832	integral component of membrane|plasma membrane|defense response to fungus
Soltu.DM.01G006600	24.7233	10.7804	38.6663	3.60139	1.84855	0.00101202	0.00483523	Up	0.938191	1.36254	1.47651	0.467873	0.157101	0.43755		EIX2	Receptor-like protein EIX2	GO:0016021,GO:0005886,GO:0050832	integral component of membrane|plasma membrane|defense response to fungus
Soltu.DM.01G006610	9.33444	6.32641	12.3425	1.94626	0.960702	0.285597	0.466428	Up	0.333584	0.215845	0.0823053	0.0350226	0.115246	0.176361	107057930	EIX2	Receptor-like protein EIX2	GO:0016021,GO:0005886,GO:0050832	integral component of membrane|plasma membrane|defense response to fungus
Soltu.DM.01G006640	29.2136	16.1133	42.3138	2.62967	1.39488	0.00441355	0.0173748	Up	0.524816	0.454952	0.36904	0.229009	0.11278	0.175726		EIX2	Receptor-like protein EIX2	GO:0016021,GO:0005886,GO:0050832	integral component of membrane|plasma membrane|defense response to fungus
Soltu.DM.01G006670	279.856	283.694	276.017	0.972793	-0.039795	0.814599	0.895235	Down	3.1406	3.39736	2.55264	3.17748	3.05095	3.17743		EIX2	Receptor-like protein EIX2	GO:0016021,GO:0005886,GO:0050832	integral component of membrane|plasma membrane|defense response to fungus
Soltu.DM.01G006700	37.5152	17.3925	57.6378	3.31687	1.72982	8.14e-05	0.000501699	Up	0.600202	0.670804	0.562734	0.141496	0.153498	0.263086		EIX2	Receptor-like protein EIX2	GO:0016021,GO:0005886,GO:0050832	integral component of membrane|plasma membrane|defense response to fungus
Soltu.DM.01G006740	97.2007	49.9841	144.417	2.89345	1.53279	1.47e-07	1.49e-06	Up	1.43033	1.44529	1.24919	0.488562	0.321534	0.629816	102593754	EIX2	Receptor-like protein EIX2	GO:0016021,GO:0005886,GO:0050832	integral component of membrane|plasma membrane|defense response to fungus
Soltu.DM.01G006760	33.426	24.4648	42.3871	1.73294	0.793224	0.0983459	0.218766	Up	0.581467	0.422989	0.377424	0.1896	0.188742	0.426831	107057934	EIX2	Receptor-like protein EIX2	GO:0016021,GO:0005886,GO:0050832	integral component of membrane|plasma membrane|defense response to fungus
Soltu.DM.01G006770	32.7592	17.1948	48.3235	2.80311	1.48703	0.00168059	0.00751608	Up	0.844967	1.02738	0.96198	0.24079	0.509365	0.262715	102597701
Soltu.DM.01G006780	10231.6	10246.7	10216.6	0.997034	-0.00428499	0.951173	0.972968	Down	188.301	168.352	176.815	179.522	175.919	183.14	102587281	AXS2	UDP-D-apiose/UDP-D-xylose synthase 2	GO:0048046,GO:0005737,GO:0005829,GO:0003824,GO:0050662,GO:0071555	apoplast|cytoplasm|cytosol|catalytic activity|coenzyme binding|cell wall organization	sot00520	Amino sugar and nucleotide sugar metabolism
Soltu.DM.01G006800	760.85	635.351	886.349	1.39501	0.480278	0.125965	0.263355	Up	54.8919	30.0759	44.4686	26.775	26.3943	40.3481	102581863		Uncharacterized protein At4g22758
Soltu.DM.01G006810	13.7192	0	27.4383	148.925	7.21844	1.18e-07	1.22e-06	Up	2.55306	1.17061	2.46621	0	0	0	102577707	DREB1F	Dehydration-responsive element-binding protein 1F	GO:0005634,GO:0003677,GO:0003700	nucleus|DNA binding|DNA-binding transcription factor activity
Soltu.DM.01G006820	1127.2	1158.85	1095.55	0.945093	-0.0814724	0.45419	0.63133	Down	25.645	24.9222	22.4369	23.3213	28.0345	26.3574	102588669	ATP23	Mitochondrial inner membrane protease ATP23	GO:0005743,GO:0046872,GO:0004222	mitochondrial inner membrane|metal ion binding|metalloendopeptidase activity
Soltu.DM.01G006830	779.524	794.356	764.692	0.962777	-0.0547268	0.649251	0.786576	Down	29.721	34.6814	32.4692	36.2743	34.6747	30.2913	102588127		60S acidic ribosomal protein P2	GO:0005840,GO:0003735,GO:0006414	ribosome|structural constituent of ribosome|translational elongation	sot03010	Ribosome
Soltu.DM.01G006840	8.01653	10.1448	5.88822	0.582367	-0.779999	0.443669	0.622826	Down	0.0294814	0.111521	0.027641	0.205832	0.0276454	0.0592282	102589868	PARP3	Protein ADP-ribosyltransferase PARP3	GO:0005730,GO:0005634,GO:0003677,GO:0003950,GO:1990404,GO:0006302,GO:0070212	nucleolus|nucleus|DNA binding|NAD+ ADP-ribosyltransferase activity|protein ADP-ribosylase activity|double-strand break repair|protein poly-ADP-ribosylation	sot03410	Base excision repair
Soltu.DM.01G006850	214.718	162.656	266.78	1.63999	0.713688	0.00167768	0.0075058	Up	4.05902	5.31213	5.59121	2.09137	3.51762	3.57488	102587803
Soltu.DM.01G006890	4.64244	7.24883	2.03605	0.277589	-1.84898	0.162271	0.315756	Down	0.267301	0	0.050123	0.266605	0.651703	0.214804			Probable protein phosphatase 2C 80	GO:0009507,GO:0009570,GO:0046872,GO:0004721	chloroplast|chloroplast stroma|metal ion binding|phosphoprotein phosphatase activity
Soltu.DM.01G006920	21.3773	16.8138	25.9407	1.53991	0.622843	0.331208	0.51596	Up	0.427752	0.298993	0.68004	0.0927472	0.505752	0.317588	102587476
Soltu.DM.01G006950	2417.62	2320.05	2515.19	1.08408	0.116478	0.130722	0.270098	Up	74.1086	73.7676	75.3035	68.1783	69.8645	69.1534	102587145	RPL10AA	60S ribosomal protein L10a-1	GO:0005829,GO:0022625,GO:0022626,GO:0005886,GO:0009506,GO:0042788,GO:0003723,GO:0003735,GO:0000470,GO:0006412	cytosol|cytosolic large ribosomal subunit|cytosolic ribosome|plasma membrane|plasmodesma|polysomal ribosome|RNA binding|structural constituent of ribosome|maturation of LSU-rRNA|translation	sot03010	Ribosome
Soltu.DM.01G006960	35.0197	30.6073	39.4321	1.29172	0.369298	0.485861	0.660233	Up	0.207932	0.636182	0.561919	0.59777	0.206452	0.294872
Soltu.DM.01G006970	19.9222	14.0177	25.8267	1.84477	0.883444	0.144253	0.290187	Up	0.669463	1.89931	1.03117	0.524635	0.627772	0.816579	102586470	CET1	CEN-like protein 1	GO:0005737	cytoplasm
Soltu.DM.01G006990	14.8333	9.47677	20.1898	2.13974	1.09744	0.170811	0.327545	Up	0.18572	0.878164	0.497503	0.423396	0.0497583	0.266509		CET1	CEN-like protein 1	GO:0005737	cytoplasm
Soltu.DM.01G007000	5.11917	3.05643	7.1819	2.36232	1.2402	0.345386	0.530555	Up	0.528663	0.0999899	1.58611	0.527285	0	0.424835	102586141	CET1	CEN-like protein 1	GO:0005737	cytoplasm
Soltu.DM.01G007010	77.1833	37.2031	117.163	3.1544	1.65737	1.22e-07	1.26e-06	Up	11.0344	11.8711	11.6744	4.84654	2.75294	3.45743	107060163
Soltu.DM.01G007020	342.171	230.071	454.272	1.9762	0.982729	8.49e-09	1.03e-07	Up	13.1441	14.2962	14.7107	7.55481	5.55096	8.40789	102585364	9DC3	Receptor-like protein 9DC3	GO:0016021,GO:0005886,GO:0050832	integral component of membrane|plasma membrane|defense response to fungus
Soltu.DM.01G007060	136.936	150.914	122.959	0.814859	-0.295378	0.255677	0.43119	Down	14.1204	12.8697	9.68937	17.3494	10.5545	17.473	102587023
Soltu.DM.01G007070	585.877	417.929	753.826	1.80341	0.85073	6.66e-10	9.36e-09	Up	14.8018	16.1799	11.9896	7.85944	8.06766	8.05294	102605772	I-2	Protein phosphatase inhibitor 2	GO:0005737,GO:0005634,GO:0004864,GO:0043666,GO:0009966	cytoplasm|nucleus|protein phosphatase inhibitor activity|regulation of phosphoprotein phosphatase activity|regulation of signal transduction
Soltu.DM.01G007080	1271.79	1447.85	1095.73	0.756882	-0.40186	2.26e-05	0.00015605	Down	23.2695	25.1493	23.3331	31.3185	30.4348	33.7077		CFIS2	Pre-mRNA cleavage factor Im 25 kDa subunit 2	GO:0005849,GO:0017091,GO:0016787,GO:0046872,GO:0003729,GO:0006378,GO:0006397	mRNA cleavage factor complex|AU-rich element binding|hydrolase activity|metal ion binding|mRNA binding|mRNA polyadenylation|mRNA processing
Soltu.DM.01G007090	453.322	484.334	422.31	0.87173	-0.198047	0.135343	0.277099	Down	10.4667	9.43009	9.12818	11.1683	10.7876	11.5558	102584072	CFIS2	Pre-mRNA cleavage factor Im 25 kDa subunit 2	GO:0005849,GO:0017091,GO:0016787,GO:0046872,GO:0003729,GO:0006378,GO:0006397	mRNA cleavage factor complex|AU-rich element binding|hydrolase activity|metal ion binding|mRNA binding|mRNA polyadenylation|mRNA processing	sot03015	mRNA surveillance pathway
Soltu.DM.01G007150	5.69619	10.4034	0.988942	0.0950855	-3.39463	0.007274	0.0267023	Down	0.0292498	0.0276611	0.0274239	0.291736	0.191998	0.411341	102602565	LTI65	Low-temperature-induced 65 kDa protein	GO:0009738,GO:0010150,GO:0009737,GO:0009409,GO:0009651,GO:0009414	abscisic acid-activated signaling pathway|leaf senescence|response to abscisic acid|response to cold|response to salt stress|response to water deprivation
Soltu.DM.01G007160	17.277	24.5969	9.95713	0.404477	-1.30587	0.0518237	0.133129	Down	0.974072	0.779449	0.421507	2.242	0.772886	2.40851
Soltu.DM.01G007170	252.482	171.376	333.588	1.94769	0.961763	0.000150956	0.000880173	Up	7.66827	10.9727	9.2899	3.32285	3.74349	7.4143	102603240
Soltu.DM.01G007180	30.6243	30.1254	31.1233	1.03455	0.0490074	0.925925	0.958946	Up	0.398045	0.240913	0.806105	0.635212	0.388187	0.383844	102603580	lcsQ	Nucleotidyltransferase lcsQ
Soltu.DM.01G007190	5.80765	8.91173	2.70357	0.300244	-1.73579	0.128981	0.267868	Down	0.149075	0.0234963	0.0232948	0.148686	0.349477	0.149746	102580027	LAX2	Protein LAX PANICLE 2	GO:0005634,GO:0007275,GO:0045893,GO:2000032	nucleus|multicellular organism development|positive regulation of transcription, DNA-templated|regulation of secondary shoot formation
Soltu.DM.01G007220	9.83261	8.77172	10.8935	1.24401	0.314995	0.729572	0.841044	Up	0.134607	0.0954717	0.126204	0.223759	0.0420746	0.0225354		TIC214	Protein TIC 214	GO:0009706,GO:0016021,GO:0015031	chloroplast inner membrane|integral component of membrane|protein transport
Soltu.DM.01G007230	1453.68	1247.87	1659.5	1.32959	0.410981	8.94e-06	6.66e-05	Up	61.0048	55.6225	56.8939	43.6401	45.435	42.2219	102605255
Soltu.DM.01G007240	227.782	180.742	274.823	1.52142	0.605422	0.00495169	0.0191843	Up	7.3958	9.34413	6.96185	4.69147	4.16114	6.86449	102605589		GEM-like protein 5	GO:0009793,GO:0098755,GO:0010029,GO:0009845	embryo development ending in seed dormancy|maintenance of seed dormancy by absisic acid|regulation of seed germination|seed germination
Soltu.DM.01G007250	184.635	159.556	209.715	1.31533	0.395425	0.0723128	0.172579	Up	4.66953	6.82459	4.72628	4.49858	3.50796	4.42404	102605922
Soltu.DM.01G007260	4376.13	4554.68	4197.58	0.921556	-0.117857	0.12621	0.263666	Down	149.553	137.531	140.544	148.745	152.396	166.021	102606262	GILP	GSH-induced LITAF domain protein	GO:0005886,GO:0046872,GO:0034051	plasma membrane|metal ion binding|negative regulation of plant-type hypersensitive response
Soltu.DM.01G007280	1680.93	1397.08	1964.78	1.4063	0.4919	1.94e-07	1.93e-06	Up	17.6635	19.1706	17.0993	11.8796	12.9965	13.7329	102579054		Uncharacterized protein At2g33490	GO:0005886	plasma membrane
Soltu.DM.01G007360	20.532	19.1086	21.9555	1.15139	0.203377	0.718278	0.833943	Up	0.99513	1.41162	1.57445	1.05457	0.816513	1.62437
Soltu.DM.01G007380	51.5654	47.903	55.2278	1.15431	0.207028	0.572242	0.729098	Up	3.80637	4.64953	4.31225	4.98284	2.90008	3.26592	102597115	PME68	Probable pectinesterase 68	GO:0005618,GO:0005576,GO:0045330,GO:0030599,GO:0042545,GO:0045490	cell wall|extracellular region|aspartyl esterase activity|pectinesterase activity|cell wall modification|pectin catabolic process
Soltu.DM.01G007390	366.02	384.406	347.635	0.904194	-0.145295	0.329925	0.514357	Down	7.71119	7.95732	8.08684	8.97683	9.60466	7.84008	102594031					sot03020	RNA polymerase
Soltu.DM.01G007400	123.136	138.876	107.397	0.773374	-0.370762	0.125394	0.26274	Down	12.4897	12.5987	12.1561	19.3382	15.7274	13.3823	102594031					sot03020	RNA polymerase
Soltu.DM.01G007410	520.725	526.389	515.061	0.978367	-0.0315528	0.799974	0.886837	Down	13.8911	14.3003	12.8701	14.3185	14.1542	13.7613	102594436
Soltu.DM.01G007440	4.22432	4.4132	4.03544	0.913561	-0.130427	0.92359	0.957649	Down	0.939845	0.2222	0.220294	0.703047	0	0.826067	102596459
Soltu.DM.01G007490	647.273	652.263	642.284	0.984933	-0.0219018	0.851889	0.916903	Down	67.4141	76.0044	71.2677	76.9582	70.7415	71.7484	102596532
Soltu.DM.01G007500	3147.37	2344.82	3949.92	1.68445	0.752277	4.36e-23	1.82e-21	Up	85.7098	86.4959	82.6416	48.7138	51.112	52.4621	102596877	NAC083	NAC domain-containing protein 83	GO:0005634,GO:0003677,GO:0003700,GO:0010150,GO:0045892,GO:0009737,GO:0009651,GO:0016032,GO:0010089	nucleus|DNA binding|DNA-binding transcription factor activity|leaf senescence|negative regulation of transcription, DNA-templated|response to abscisic acid|response to salt stress|viral process|xylem development
Soltu.DM.01G007520	2774.62	3549.3	1999.94	0.563466	-0.827599	8.58e-21	3.05e-19	Down	43.5086	42.2416	39.4039	80.6461	68.193	74.7741	102579608	GDPD3	Glycerophosphodiester phosphodiesterase GDPD3	GO:0008889,GO:0006071,GO:0046475	glycerophosphodiester phosphodiesterase activity|glycerol metabolic process|glycerophospholipid catabolic process	sot00564	Glycerophospholipid metabolism
Soltu.DM.01G007620	30.6928	25.2931	36.0925	1.42713	0.513115	0.266699	0.444145	Up	0.40761	0.699559	0.481244	0.346318	0.424696	0.348787	102603594		Uncharacterized protein C1F8.04c	GO:0005829,GO:0005634,GO:0004000,GO:0046872,GO:0050270	cytosol|nucleus|adenosine deaminase activity|metal ion binding|S-adenosylhomocysteine deaminase activity
Soltu.DM.01G007680	195.71	178.146	213.274	1.1971	0.259538	0.261933	0.438902	Up	2.74498	2.74423	4.26486	2.33106	3.30947	2.55251	102602687
Soltu.DM.01G007690	2643.62	2506.17	2781.07	1.10971	0.150188	0.126867	0.264771	Up	58.9884	53.7629	67.812	56.9468	55.4402	51.3356	102602349	PNSL5	Photosynthetic NDH subunit of lumenal location 5, chloroplastic	GO:0009507,GO:0009533,GO:0009534,GO:0009543,GO:0009535,GO:0009579,GO:0031977,GO:0003755,GO:0043424,GO:0051082,GO:0010275,GO:0006457	chloroplast|chloroplast stromal thylakoid|chloroplast thylakoid|chloroplast thylakoid lumen|chloroplast thylakoid membrane|thylakoid|thylakoid lumen|peptidyl-prolyl cis-trans isomerase activity|protein histidine kinase binding|unfolded protein binding|NAD(P)H dehydrogenase complex assembly|protein folding
Soltu.DM.01G007730	57.8781	61.1924	54.5639	0.89047	-0.167361	0.640653	0.779718	Down	0.622107	0.513611	0.435139	0.393959	0.685222	0.694342	102589886	spb1	AdoMet-dependent rRNA methyltransferase spb1	GO:0005730,GO:0005634,GO:0030687,GO:0016435,GO:0070039,GO:0008650,GO:0000453,GO:0000466,GO:0000463,GO:0031167	nucleolus|nucleus|preribosome, large subunit precursor|rRNA (guanine) methyltransferase activity|rRNA (guanosine-2'-O-)-methyltransferase activity|rRNA (uridine-2'-O-)-methyltransferase activity|enzyme-directed rRNA 2'-O-methylation|maturation of 5.8S rRNA from tricistronic rRNA transcript (SSU-rRNA, 5.8S rRNA, LSU-rRNA)|maturation of LSU-rRNA from tricistronic rRNA transcript (SSU-rRNA, 5.8S rRN…
Soltu.DM.01G007750	158.425	176.875	139.975	0.790929	-0.33838	0.13113	0.270646	Down	2.13406	1.60727	1.47367	2.4089	1.92926	2.2977	102594553	ACR4	ACT domain-containing protein ACR4	GO:0009506	plasmodesma
Soltu.DM.01G007760	44.3525	33.2972	55.4079	1.66276	0.733583	0.057277	0.144206	Up	1.565	1.30138	1.4926	0.995761	0.986795	0.650503	102594874	CML16	Probable calcium-binding protein CML16	GO:0005509	calcium ion binding	sot04626	Plant-pathogen interaction
Soltu.DM.01G007770	32.5421	31.2702	33.814	1.08367	0.115923	0.805159	0.88935	Up	0.222322	0.311477	0.277925	0.312082	0.138985	0.306035	102595213	PERK9	Proline-rich receptor-like protein kinase PERK9
Soltu.DM.01G007780	383.539	446.252	320.826	0.718889	-0.47616	0.0014279	0.0065485	Down	24.4038	21.1188	26.262	35.209	34.1101	31.1431	102595876
Soltu.DM.01G007790	1227.54	1341.3	1113.79	0.830441	-0.268051	0.0042946	0.0169943	Down	28.6524	27.2445	28.9962	35.0703	32.5064	35.3465	102595539	SAMDC1	S-adenosylmethionine decarboxylase beta chain	GO:0004014,GO:0006557,GO:0008295,GO:0006597	adenosylmethionine decarboxylase activity|S-adenosylmethioninamine biosynthetic process|spermidine biosynthetic process|spermine biosynthetic process	sot00270,sot00330	Cysteine and methionine metabolism|Arginine and proline metabolism
Soltu.DM.01G007800	1395.5	815.473	1975.53	2.42272	1.27663	5.83e-34	4.44e-32	Up	82.1939	78.0296	68.141	33.4562	29.1123	32.3405
Soltu.DM.01G008010	5.9663	4.61846	7.31414	1.57678	0.656981	0.543045	0.705878	Up	0.528663	0.0908999	0.405541	0.19174	0.360538	0.0965533
Soltu.DM.01G008020	197.345	213.379	181.311	0.849139	-0.235927	0.218477	0.386967	Down	1.74585	1.4934	1.39833	1.89006	1.90039	1.70084	102585051	BHLH49	Transcription factor bHLH49	GO:0005634,GO:0003700,GO:0046983,GO:0043565,GO:0040008,GO:0006355	nucleus|DNA-binding transcription factor activity|protein dimerization activity|sequence-specific DNA binding|regulation of growth|regulation of transcription, DNA-templated
Soltu.DM.01G008040	487.228	273.12	701.337	2.56718	1.36018	3.1e-22	1.22e-20	Up	9.19239	9.43555	10.5591	3.84391	4.17612	3.41248	102581080	ACR4	ACT domain-containing protein ACR4	GO:0009506	plasmodesma
Soltu.DM.01G008060	8.65073	9.69301	7.60844	0.784346	-0.350438	0.668785	0.799918	Down	0.275086	0.202335	0.200599	0.304854	0.257955	0.307027	102603835
Soltu.DM.01G008070	395.903	323.8	468.005	1.44496	0.531026	0.000506353	0.00261568	Up	14.2048	12.3356	11.1675	8.10375	8.37048	9.79937
Soltu.DM.01G008080	76.1034	76.2503	75.9566	0.995349	-0.00672563	0.983628	0.99154	Down	3.69926	2.47357	2.10202	2.42247	2.34763	3.60331	102604170
Soltu.DM.01G008090	157.59	117.142	198.037	1.69014	0.757143	0.000683206	0.00341354	Up	13.092	9.74424	12.1611	6.04531	6.7067	8.09756
Soltu.DM.01G008100	135.143	128.237	142.048	1.10715	0.146853	0.597884	0.747946	Up	5.99346	3.69907	3.37159	3.68109	3.07633	5.13322
Soltu.DM.01G008110	4.6104	2.3229	6.8979	2.96521	1.56814	0.206448	0.372502	Up	0.234961	0.2222	0.330441	0	0.110165	0.157346	102604506
Soltu.DM.01G008120	1024.79	1034.75	1014.82	0.980662	-0.0281727	0.823609	0.900422	Down	18.7282	18.3485	16.8246	15.445	17.9378	21.9785	102604838
Soltu.DM.01G008130	319.95	266.242	373.659	1.40289	0.488406	0.00439655	0.0173134	Up	10.0555	9.60212	7.05933	6.3845	6.34752	6.43	107058734
Soltu.DM.01G008150	782.867	803.302	762.432	0.949175	-0.0752537	0.583511	0.737651	Down	29.761	31.0128	23.4955	30.5153	25.4546	33.4748
Soltu.DM.01G008160	66.469	71.0544	61.8835	0.871901	-0.197764	0.560885	0.719558	Down	0.943358	1.55059	1.55835	1.20973	1.53754	1.94033	102605174		Probable 6-phosphogluconolactonase 2	GO:0017057,GO:0005975,GO:0006098	6-phosphogluconolactonase activity|carbohydrate metabolic process|pentose-phosphate shunt	sot00030	Pentose phosphate pathway
Soltu.DM.01G008180	12438.8	14998.2	9879.3	0.658676	-0.602359	7.31e-15	1.71e-13	Down	342.973	323.936	291.428	480.795	471.719	512.264	102605513	SP1L1	Protein SPIRAL1-like 1	GO:0010005,GO:0043622	cortical microtubule, transverse to long axis|cortical microtubule organization
Soltu.DM.01G008210	12.8054	11.0184	14.5924	1.32272	0.403503	0.557251	0.716641	Up	1.55864	1.00852	0.922955	0.981841	0.846177	0.824032	102606069	N	TMV resistance protein N	GO:0005737,GO:0043531,GO:0005524,GO:0009626,GO:0007165	cytoplasm|ADP binding|ATP binding|plant-type hypersensitive response|signal transduction
Soltu.DM.01G008240	9.41929	5.70317	13.1354	2.30838	1.20688	0.146457	0.293479	Up	0.551116	1.04237	0.516712	0.329808	0.206718	0.387518
Soltu.DM.01G008250	18.8054	4.40647	33.2043	7.57528	2.9213	0.00045973	0.00239944	Up	3.5588	1.68276	2.24861	0.0771637	0	0.932564
Soltu.DM.01G008270	72.8607	63.2796	82.4418	1.30202	0.380755	0.216618	0.384889	Up	1.45188	1.57153	1.18084	1.18639	1.19743	0.860993	102595306	UPS2	Ureide permease 2	GO:0016021,GO:0016020,GO:0005886,GO:0005274,GO:0005524,GO:0015210,GO:0015505,GO:0015720,GO:0043100,GO:0015857	integral component of membrane|membrane|plasma membrane|allantoin:proton symporter activity|ATP binding|uracil transmembrane transporter activity|uracil:cation symporter activity|allantoin transport|pyrimidine nucleobase salvage|uracil transport
Soltu.DM.01G008280	176.812	171.038	182.587	1.06779	0.0946334	0.715909	0.832132	Up	3.92883	4.29447	5.35792	5.62343	4.52147	2.63955	102595638	PDCB2	PLASMODESMATA CALLOSE-BINDING PROTEIN 2	GO:0031225,GO:0046658,GO:0009506,GO:0001872,GO:0030247,GO:0009408	anchored component of membrane|anchored component of plasma membrane|plasmodesma|(1->3)-beta-D-glucan binding|polysaccharide binding|response to heat
Soltu.DM.01G008300	12.5788	7.98796	17.1696	2.15237	1.10592	0.205892	0.371783	Up	0.03603	0.24987	0.315288	0.0239574	0.101359	0.156833	102596633		Probable methyltransferase PMT5	GO:0005789,GO:0005768,GO:0005794,GO:0016021,GO:0005802,GO:0005774,GO:0008757,GO:0052546	endoplasmic reticulum membrane|endosome|Golgi apparatus|integral component of membrane|trans-Golgi network|vacuolar membrane|S-adenosylmethionine-dependent methyltransferase activity|cell wall pectin metabolic process
Soltu.DM.01G008310	84.5546	19.9725	149.137	7.45545	2.89829	8.62e-18	2.54e-16	Up	2.33998	1.64386	1.83035	0.173374	0.288388	0.322357		BGLU40	Beta-glucosidase 40	GO:0048046,GO:0009507,GO:0008422,GO:0102483,GO:0005975	apoplast|chloroplast|beta-glucosidase activity|scopolin beta-glucosidase activity|carbohydrate metabolic process
Soltu.DM.01G008330	929.106	659.361	1198.85	1.81909	0.86322	5.36e-09	6.75e-08	Up	12.8348	16.8947	15.5829	8.57305	6.4919	10.0536	102597521	ZAT9	Zinc finger protein ZAT9	GO:0005634,GO:0003700,GO:0046872,GO:0044212,GO:0006355	nucleus|DNA-binding transcription factor activity|metal ion binding|transcription regulatory region DNA binding|regulation of transcription, DNA-templated
Soltu.DM.01G008340	5.25554	0.679058	9.83202	14.6539	3.87322	0.00857954	0.0307184	Up	0.259525	0.777194	0.20277	0.0431415	0	0.043449	102599465	GSTU17	Glutathione S-transferase U17	GO:0009507,GO:0005737,GO:0005829,GO:0004364,GO:0009704,GO:0006749,GO:0048527,GO:0080148,GO:0040008,GO:0060416,GO:0080167,GO:0009651,GO:0009407	chloroplast|cytoplasm|cytosol|glutathione transferase activity|de-etiolation|glutathione metabolic process|lateral root development|negative regulation of response to water deprivation|regulation of growth|response to growth hormone|response to karrikin|response to salt stress|toxin catabolic process	sot00480	Glutathione metabolism
Soltu.DM.01G008360	1057.22	1160.46	953.979	0.822119	-0.282581	0.0100673	0.0350487	Down	19.4002	18.7723	18.7456	21.8398	21.3008	26.6001	102591705
Soltu.DM.01G008370	4955.78	5892.54	4019.02	0.681991	-0.552176	7.8e-11	1.23e-09	Down	63.5587	58.9659	51.9676	87.0095	84.0803	86.4329
Soltu.DM.01G008440	1.79554	1.01657	2.57452	2.54929	1.35009	0.545595	0.707745	Up	0	0.0743726	0.516143	0	0	0.236994
Soltu.DM.01G008470	469.161	497.52	440.803	0.88568	-0.175143	0.205564	0.371315	Down	5.257	5.07955	4.35023	5.10652	5.66906	5.91205	102605406	PTST2	Protein PTST homolog 2, chloroplastic	GO:0009507,GO:2001066,GO:2001071,GO:0030247,GO:2001070,GO:2000014,GO:0010581,GO:0019252	chloroplast|amylopectin binding|maltoheptaose binding|polysaccharide binding|starch binding|regulation of endosperm development|regulation of starch biosynthetic process|starch biosynthetic process
Soltu.DM.01G008480	397.936	363.802	432.07	1.18783	0.248327	0.110567	0.238598	Up	5.13523	4.03628	5.01527	4.25697	3.47429	4.29862	102604395	TLP1	Protein TWIN LOV 1	GO:0005634,GO:0000155,GO:0009881,GO:0018298	nucleus|phosphorelay sensor kinase activity|photoreceptor activity|protein-chromophore linkage
Soltu.DM.01G008490	609.314	632.923	585.705	0.925615	-0.111516	0.34588	0.531148	Down	8.6769	9.13708	8.88281	9.71464	9.00151	10.3335	102604056	CYP83B1	Cytochrome P450 83B1	GO:0005783,GO:0016021,GO:0016020,GO:0005739,GO:0005886,GO:0020037,GO:0005506,GO:0016709,GO:0048830,GO:0052544,GO:0042742,GO:0009759,GO:0009684,GO:0009682,GO:0040008,GO:0010114,GO:0009641,GO:0000162	endoplasmic reticulum|integral component of membrane|membrane|mitochondrion|plasma membrane|heme binding|iron ion binding|oxidoreductase activity,acting on paired donors, with incorporation or reduction of molecular oxygen, NAD(P)H as one donor, and incorporation of one atom of oxygen|adventitious root development|defense response by callose deposition in cell wall|defense response to bacterium|i…
Soltu.DM.01G008580	2.0209	0	4.0418	21.9044	4.45315	0.0526669	0.134874	Up	0.158269	0.0748365	0	0	0	0	102597655	AOP1	Probable 2-oxoglutarate-dependent dioxygenase AOP1	GO:0016020,GO:0051213,GO:0046872	membrane|dioxygenase activity|metal ion binding
Soltu.DM.01G008690	19.5661	21.4342	17.6981	0.827016	-0.274012	0.664578	0.797241	Down	0.174168	0.494126	0.148451	0.300052	0.252407	0.445334		IPT5	Adenylate isopentenyltransferase 5, chloroplastic	GO:0009507,GO:0005739,GO:0009536,GO:0052623,GO:0009824,GO:0005524,GO:0052622,GO:0052381,GO:0009691,GO:0009860,GO:0006400	chloroplast|mitochondrion|plastid|ADP dimethylallyltransferase activity|AMP dimethylallyltransferase activity|ATP binding|ATP dimethylallyltransferase activity|tRNA dimethylallyltransferase activity|cytokinin biosynthetic process|pollen tube growth|tRNA modification
Soltu.DM.01G008790	108.625	119.47	97.7795	0.818538	-0.288879	0.278689	0.458544	Down	9.23045	6.56934	11.3308	11.0097	10.8865	11.4705	102602870
Soltu.DM.01G008800	40.8829	39.2528	42.513	1.08526	0.118036	0.796646	0.884816	Up	1.72476	1.85606	3.79181	2.1355	1.50581	3.22609	102582370	KAT1	Potassium channel KAT1	GO:0016021,GO:0005886,GO:0042802,GO:0005242,GO:0034765	integral component of membrane|plasma membrane|identical protein binding|inward rectifier potassium channel activity|regulation of ion transmembrane transport
Soltu.DM.01G008840	114.045	134.905	93.1854	0.691621	-0.531947	0.0799092	0.1872	Down	0.730954	1.68973	1.25643	2.17364	1.71358	1.46849	102582949	PCMP-E54	Pentatricopeptide repeat-containing protein At1g26900, mitochondrial
Soltu.DM.01G008850	870.203	961.279	779.128	0.810386	-0.303319	0.00480258	0.0186976	Down	12.2478	10.531	11.826	14.495	14.1849	14.2923	102583277
Soltu.DM.01G008860	4.50595	3.70276	5.30914	1.43504	0.521092	0.651641	0.788492	Up	0.589483	0.39819	0.315819	0.503954	0.157935	0.253773
Soltu.DM.01G008900	731.337	830.962	631.711	0.76011	-0.39572	0.00186491	0.00823594	Down	15.6143	13.3874	14.3088	21.7186	18.4567	17.1491	102583834	GCD1	Protein GAMETE CELL DEFECTIVE 1, mitochondrial
Soltu.DM.01G008980	157.346	177.145	137.548	0.777002	-0.364009	0.0941346	0.211899	Down	3.89767	5.08067	5.10293	6.6543	6.1245	5.4672	102586279	MPK9	Mitogen-activated protein kinase 9	GO:0005737,GO:0005829,GO:0005739,GO:0005634,GO:0005524,GO:0004707,GO:0009738,GO:0035556,GO:0010468	cytoplasm|cytosol|mitochondrion|nucleus|ATP binding|MAP kinase activity|abscisic acid-activated signaling pathway|intracellular signal transduction|regulation of gene expression
Soltu.DM.01G009110	2521.63	2652.79	2390.47	0.901171	-0.150127	0.128209	0.266759	Down	70.5874	85.1523	71.3752	78.2043	83.4575	92.1178		RPS9C	40S ribosomal protein S9-2	GO:0005829,GO:0022627,GO:0016020,GO:0009506,GO:0019843,GO:0003735,GO:0045903,GO:0006412	cytosol|cytosolic small ribosomal subunit|membrane|plasmodesma|rRNA binding|structural constituent of ribosome|positive regulation of translational fidelity|translation
Soltu.DM.01G009130	11905.1	11688.4	12121.9	1.03709	0.052543	0.488529	0.662652	Up	359.82	398.318	396.218	363.345	395.608	361.046	102584617	RPS9C	40S ribosomal protein S9-2	GO:0005829,GO:0022627,GO:0016020,GO:0009506,GO:0019843,GO:0003735,GO:0045903,GO:0006412	cytosol|cytosolic small ribosomal subunit|membrane|plasmodesma|rRNA binding|structural constituent of ribosome|positive regulation of translational fidelity|translation	sot03010	Ribosome
Soltu.DM.01G009140	1071.92	1077.16	1066.68	0.990267	-0.0141103	0.900681	0.94522	Down	27.0648	22.2055	27.5999	27.8078	24.7999	25.5232	102578739	CYP23	Peptidyl-prolyl cis-trans isomerase CYP23	GO:0005783,GO:0005768,GO:0005794,GO:0005802,GO:0003755	endoplasmic reticulum|endosome|Golgi apparatus|trans-Golgi network|peptidyl-prolyl cis-trans isomerase activity
Soltu.DM.01G009170	168.246	193.523	142.969	0.738369	-0.437586	0.0730934	0.174075	Down	3.25648	3.04273	1.82826	3.44248	3.25482	4.38764	102578183
Soltu.DM.01G009200	418.58	403.09	434.07	1.0769	0.106887	0.482573	0.657212	Up	7.52501	5.87175	7.95694	6.93324	6.24949	6.77927	102606171	UTR3	UDP-galactose/UDP-glucose transporter 3	GO:0030176,GO:0030173,GO:0015297,GO:0005459,GO:0005460,GO:0008643,GO:0009553,GO:0030968,GO:0009555,GO:0072334	integral component of endoplasmic reticulum membrane|integral component of Golgi membrane|antiporter activity|UDP-galactose transmembrane transporter activity|UDP-glucose transmembrane transporter activity|carbohydrate transport|embryo sac development|endoplasmic reticulum unfolded protein response|pollen development|UDP-galactose transmembrane transport
Soltu.DM.01G009210	1954.61	2026.45	1882.77	0.929345	-0.105713	0.364903	0.5501	Down	25.7434	30.6816	35.7558	33.8163	29.9194	36.1828	102605836	PBL3	Probable serine/threonine-protein kinase PBL3
Soltu.DM.01G009280	380.6	407.643	353.557	0.86731	-0.205381	0.169679	0.325963	Down	5.40093	4.40547	5.20027	6.17093	5.28301	5.96631	102605494	CBSCBS2	SNF1-related protein kinase regulatory subunit gamma-1-like	GO:0005975	carbohydrate metabolic process
Soltu.DM.01G009340	9354.22	10003.1	8705.29	0.870251	-0.200497	0.00357558	0.0144682	Down	180.852	186.307	172.333	214.218	205.469	204.257	102604152	EULS3	Ricin B-like lectin EULS3	GO:0005737,GO:0005634,GO:0030246,GO:0042742,GO:0090332	cytoplasm|nucleus|carbohydrate binding|defense response to bacterium|stomatal closure
Soltu.DM.01G009350	253.522	260.329	246.715	0.947551	-0.0777238	0.71101	0.829092	Down	30.0447	18.2004	28.6704	25.3808	24.2634	32.1132	102579610	TAF4B	Transcription initiation factor TFIID subunit 4b	GO:0005669,GO:0003677,GO:0008134,GO:0045944,GO:0051123	transcription factor TFIID complex|DNA binding|transcription factor binding|positive regulation of transcription by RNA polymerase II|RNA polymerase II preinitiation complex assembly	sot03022	Basal transcription factors
Soltu.DM.01G009360	2164.26	2348.82	1979.7	0.842755	-0.246816	0.00604427	0.0227913	Down	19.9824	20.1523	19.717	21.6059	25.5059	24.3535	102579610	TAF4B	Transcription initiation factor TFIID subunit 4b	GO:0005669,GO:0003677,GO:0008134,GO:0045944,GO:0051123	transcription factor TFIID complex|DNA binding|transcription factor binding|positive regulation of transcription by RNA polymerase II|RNA polymerase II preinitiation complex assembly	sot03022	Basal transcription factors
Soltu.DM.01G009370	7.02855	9.16101	4.89609	0.536572	-0.898157	0.429705	0.610438	Down	0.0731995	0.346119	0.102945	0.766591	0.0343205	0.183823	102588974	SYM1	Protein SYM1	GO:0016021,GO:0005743	integral component of membrane|mitochondrial inner membrane	sot04146	Peroxisome
Soltu.DM.01G009390	2122.76	2291.54	1953.97	0.852706	-0.22988	0.0385885	0.10531	Down	43.9197	43.5884	48.4736	60.2322	55.3753	44.7888	102603136		Mitochondrial outer membrane protein porin of 36 kDa	GO:0005741,GO:0046930,GO:0015288,GO:0008308	mitochondrial outer membrane|pore complex|porin activity|voltage-gated anion channel activity
Soltu.DM.01G009400	4.87296	4.67853	5.0674	1.07924	0.110013	0.934947	0.963742	Up	0.265224	0.0684052	0.0226062	0	0.0904391	0.242199	102603475	HIR1	Hypersensitive-induced response protein 1	GO:0005794,GO:0016020,GO:0005886,GO:0009506,GO:0005774,GO:0005773,GO:0043424	Golgi apparatus|membrane|plasma membrane|plasmodesma|vacuolar membrane|vacuole|protein histidine kinase binding
Soltu.DM.01G009410	1354.68	1326.23	1383.13	1.0428	0.0604619	0.542918	0.705867	Up	18.2608	16.8901	16.9633	18.0843	16.7479	15.4481	102602801		Probable serine/threonine-protein kinase PIX7
Soltu.DM.01G009610	1.64999	2.65078	0.649198	0.246011	-2.0232	0.374854	0.559764	Down	0	0.0952285	0	0.200871	0.188853	0
Soltu.DM.01G009620	115.741	136.261	95.2215	0.698641	-0.517376	0.0644808	0.158083	Down	7.29555	8.32416	6.39402	13.0503	11.6003	7.00977
Soltu.DM.01G009860	442.015	474.233	409.797	0.864285	-0.210421	0.173523	0.331484	Down	10.0845	9.75033	10.1371	14.1366	10.5857	10.1803	102605065	mog1	Nuclear import protein mog1	GO:0005737,GO:0005829,GO:0005634,GO:0008536,GO:0007049,GO:0051301,GO:0016973,GO:0006606,GO:0023052	cytoplasm|cytosol|nucleus|Ran GTPase binding|cell cycle|cell division|poly(A)+ mRNA export from nucleus|protein import into nucleus|signaling
Soltu.DM.01G009870	886.669	863.049	910.288	1.05484	0.0770235	0.485502	0.660036	Up	10.7115	10.0954	11.2429	11.1412	9.78395	9.65582	102605397	CUL3A	Cullin-3A	GO:0031461,GO:0005829,GO:0031625,GO:0009911,GO:0016567,GO:0009639,GO:0006511	cullin-RING ubiquitin ligase complex|cytosol|ubiquitin protein ligase binding|positive regulation of flower development|protein ubiquitination|response to red or far red light|ubiquitin-dependent protein catabolic process	sot04120	Ubiquitin mediated proteolysis
Soltu.DM.01G009880	330.974	330.951	330.997	0.999828	-0.000247461	0.998802	0.999275	Down	12.3233	11.1023	11.7591	9.67295	12.308	13.4409	102605740		Uncharacterized protein YMR130W	GO:0016787	hydrolase activity
Soltu.DM.01G009900	506.947	553.437	460.458	0.831758	-0.265764	0.0924236	0.208917	Down	9.4399	7.68269	6.43232	10.1328	8.19388	10.1874	102606075	SBH1	Sphinganine C4-monooxygenase 1	GO:0005783,GO:0005789,GO:0005794,GO:0016021,GO:0005506,GO:0000170,GO:0009640,GO:0046520,GO:0030148	endoplasmic reticulum|endoplasmic reticulum membrane|Golgi apparatus|integral component of membrane|iron ion binding|sphingosine hydroxylase activity|photomorphogenesis|sphingoid biosynthetic process|sphingolipid biosynthetic process	sot00600	Sphingolipid metabolism
Soltu.DM.01G009920	1542.9	1553.18	1532.62	0.986686	-0.0193367	0.825142	0.901107	Down	15.6912	15.0783	14.4649	15.4887	15.0368	15.6194	102606414		Probable methyltransferase PMT2	GO:0005768,GO:0005794,GO:0000139,GO:0016021,GO:0016020,GO:0005802,GO:0005774,GO:0008757,GO:0052546	endosome|Golgi apparatus|Golgi membrane|integral component of membrane|membrane|trans-Golgi network|vacuolar membrane|S-adenosylmethionine-dependent methyltransferase activity|cell wall pectin metabolic process
Soltu.DM.01G009930	1318.4	1189.96	1446.84	1.21614	0.282312	0.0212105	0.0647248	Up	17.9827	23.1982	25.5349	17.4942	18.6426	19.0964	102579093	SSM4	ERAD-associated E3 ubiquitin-protein ligase DOA10	GO:0000837,GO:0030176,GO:0016021,GO:0005635,GO:0005637,GO:0061630,GO:0004842,GO:0008270,GO:0030433	Doa10p ubiquitin ligase complex|integral component of endoplasmic reticulum membrane|integral component of membrane|nuclear envelope|nuclear inner membrane|ubiquitin protein ligase activity|ubiquitin-protein transferase activity|zinc ion binding|ubiquitin-dependent ERAD pathway
Soltu.DM.01G009970	82.4077	79.4792	85.3362	1.07382	0.102753	0.71659	0.832649	Up	1.27647	1.16453	1.29534	1.01851	1.08432	1.40289	102602359	RRT4	Rhamnogalacturonan I rhamnosyltransferase 1
Soltu.DM.01G009990	396.822	298.796	494.847	1.65532	0.72711	9.86e-07	8.66e-06	Up	12.4466	12.9727	12.7869	7.10514	8.89021	7.20898	102602030		Transmembrane emp24 domain-containing protein p24delta7	GO:0030134,GO:0005783,GO:0005789,GO:0005793,GO:0033116,GO:0005794,GO:0032580,GO:0016021,GO:0006888,GO:0007030,GO:0006886	COPII-coated ER to Golgi transport vesicle|endoplasmic reticulum|endoplasmic reticulum membrane|endoplasmic reticulum-Golgi intermediate compartment|endoplasmic reticulum-Golgi intermediate compartment membrane|Golgi apparatus|Golgi cisterna membrane|integral component of membrane|ER to Golgi vesicle-mediated transport|Golgi organization|intracellular protein transport
Soltu.DM.01G010010	123.84	131.898	115.783	0.877229	-0.188975	0.411674	0.594529	Down	1.94061	1.72904	1.74428	1.96754	2.2559	1.98157	102601250	ILK1	Integrin-linked protein kinase 1	GO:0009898,GO:0005783,GO:0005789,GO:0005524,GO:0004672,GO:0004674,GO:0004712,GO:0045087,GO:0046777,GO:0006970	cytoplasmic side of plasma membrane|endoplasmic reticulum|endoplasmic reticulum membrane|ATP binding|protein kinase activity|protein serine/threonine kinase activity|protein serine/threonine/tyrosine kinase activity|innate immune response|protein autophosphorylation|response to osmotic stress
Soltu.DM.01G010020	39.5903	42.393	36.7876	0.869546	-0.201665	0.668571	0.799788	Down	0.150112	0.267217	0.52985	0.405127	0.35605	0.337056	102600903	AGO7	Protein argonaute 7	GO:0005737,GO:0003723,GO:0051607,GO:0035195,GO:0010492,GO:0010599,GO:0010267,GO:0040034,GO:0006417,GO:0010050,GO:0060145	cytoplasm|RNA binding|defense response to virus|gene silencing by miRNA|maintenance of shoot apical meristem identity|production of lsiRNA involved in RNA interference|production of ta-siRNAs involved in RNA interference|regulation of development, heterochronic|regulation of translation|vegetative phase change|viral gene silencing in virus induced gene silencing
Soltu.DM.01G010050	466.939	458.162	475.716	1.03816	0.0540336	0.674332	0.803942	Up	6.50263	6.18879	6.53868	5.9187	6.35771	6.36478	102587208
Soltu.DM.01G010060	1.50434	3.00869	0	0.0604472	-4.04818	0.108993	0.236176	Down	0	0	0	0.257678	0.121131	0
Soltu.DM.01G010080	6065.52	5870.78	6260.27	1.06637	0.092702	0.197159	0.360833	Up	190.715	204.604	207.744	187.45	193.958	187.757	102586869	EIF5A4	Eukaryotic translation initiation factor 5A-4	GO:0043022,GO:0003746,GO:0003743,GO:0045901,GO:0045905,GO:0006452	ribosome binding|translation elongation factor activity|translation initiation factor activity|positive regulation of translational elongation|positive regulation of translational termination|translational frameshifting
Soltu.DM.01G010100	1088.52	1226.89	950.149	0.774371	-0.368903	0.000242997	0.0013514	Down	14.7931	15.5004	13.9595	18.0369	19.4895	19.9948	102586535
Soltu.DM.01G010110	1727.93	1401.16	2054.69	1.46636	0.552237	1.19e-09	1.62e-08	Up	28.5928	30.2903	31.0296	19.1918	21.6046	20.9117	102586204
Soltu.DM.01G010230	88.1853	73.9229	102.448	1.38585	0.470774	0.101613	0.223955	Up	5.53478	5.14234	3.82367	4.16448	3.00479	3.36508		ALA3	Phospholipid-transporting ATPase 3	GO:0005789,GO:0005768,GO:0005794,GO:0000139,GO:0016021,GO:0005886,GO:0005802,GO:0005524,GO:0000287,GO:0005548,GO:0004012,GO:0048194,GO:0045332,GO:0048364,GO:0048367	endoplasmic reticulum membrane|endosome|Golgi apparatus|Golgi membrane|integral component of membrane|plasma membrane|trans-Golgi network|ATP binding|magnesium ion binding|phospholipid transporter activity|phospholipid-translocating ATPase activity|Golgi vesicle budding|phospholipid translocation|root development|shoot system development
Soltu.DM.01G010240	2108.82	1975.75	2241.89	1.13468	0.18229	0.026314	0.077197	Up	17.9904	18.999	17.9068	15.6482	16.4369	16.6119	102585532	ALA3	Phospholipid-transporting ATPase 3	GO:0005789,GO:0005768,GO:0005794,GO:0000139,GO:0016021,GO:0005886,GO:0005802,GO:0005524,GO:0000287,GO:0005548,GO:0004012,GO:0048194,GO:0045332,GO:0048364,GO:0048367	endoplasmic reticulum membrane|endosome|Golgi apparatus|Golgi membrane|integral component of membrane|plasma membrane|trans-Golgi network|ATP binding|magnesium ion binding|phospholipid transporter activity|phospholipid-translocating ATPase activity|Golgi vesicle budding|phospholipid translocation|root development|shoot system development
Soltu.DM.01G010250	15.9697	14.019	17.9205	1.27645	0.35214	0.572628	0.729399	Up	2.68685	1.58807	1.57445	1.33992	1.46972	1.7993	102586983
Soltu.DM.01G010270	8.71832	11.2063	6.23038	0.557437	-0.84312	0.443998	0.623101	Down	0.0969036	0.0916404	0.163538	0.579906	0.0181738	0.038936		ndhH	NAD(P)H-quinone oxidoreductase subunit H, chloroplastic	GO:0009535,GO:0051287,GO:0016655,GO:0048038,GO:0019684	chloroplast thylakoid membrane|NAD binding|oxidoreductase activity, acting on NAD(P)H, quinone or similar compound as acceptor|quinone binding|photosynthesis, light reaction
Soltu.DM.01G010280	3.8923	2.9188	4.8658	1.66203	0.732948	0.659276	0.793696	Up	0	0.807611	0.0571916	0	0.457606	0.0612742		rpl22	50S ribosomal protein L22, chloroplastic	GO:0009507,GO:0015934,GO:0019843,GO:0003735,GO:0006412	chloroplast|large ribosomal subunit|rRNA binding|structural constituent of ribosome|translation
Soltu.DM.01G010290	5.24149	3.99253	6.49045	1.62863	0.703662	0.54247	0.705557	Up	0.154731	0.43898	0.870429	0.462982	0.362737	0.0777136		rps3	30S ribosomal protein S3, chloroplastic	GO:0009507,GO:0015935,GO:0019843,GO:0003735,GO:0006412	chloroplast|small ribosomal subunit|rRNA binding|structural constituent of ribosome|translation
Soltu.DM.01G010300	9.39981	7.21072	11.5889	1.59959	0.677702	0.456203	0.633049	Up	1.11952	0.907471	0.674765	0.0797574	1.12479	0.481955		rpl16	50S ribosomal protein L16, chloroplastic	GO:0009507,GO:0005840,GO:0019843,GO:0003735,GO:0006412	chloroplast|ribosome|rRNA binding|structural constituent of ribosome|translation
Soltu.DM.01G010310	8.89973	6.3699	11.4296	1.79938	0.847498	0.326303	0.51042	Up	0.153071	0.38602	0.310951	0.254454	0.119616	0.102507		rpoA	DNA-directed RNA polymerase subunit alpha	GO:0009507,GO:0003677,GO:0003899,GO:0046983,GO:0006351	chloroplast|DNA binding|DNA-directed 5'-3' RNA polymerase activity|protein dimerization activity|transcription, DNA-templated
Soltu.DM.01G010320	10.2353	4.92593	15.5447	3.13914	1.65037	0.0707442	0.169642	Up	1.05084	0.883346	0.711562	0.291139	0.547443	0		petB	Cytochrome b6	GO:0009535,GO:0016021,GO:0045158,GO:0020037,GO:0005506,GO:0015979,GO:0022904	chloroplast thylakoid membrane|integral component of membrane|electron transporter, transferring electrons within cytochrome b6/f complex of photosystem II activity|heme binding|iron ion binding|photosynthesis|respiratory electron transport chain
Soltu.DM.01G010330	2.98609	3.3666	2.60557	0.777025	-0.363968	0.815647	0.895724	Down	0.0180568	0.0683043	0.0507888	0.144078	0.0338646	0		psbB	Photosystem II CP47 reaction center protein	GO:0009535,GO:0016021,GO:0009523,GO:0016168,GO:0045156,GO:0009772,GO:0018298	chloroplast thylakoid membrane|integral component of membrane|photosystem II|chlorophyll binding|electron transporter, transferring electrons within the cyclic electron transport pathway of photosynthesis activity|photosynthetic electron transport in photosystem II|protein-chromophore linkage
Soltu.DM.01G010340	3.43172	2.03583	4.82762	2.3869	1.25514	0.445633	0.624474	Up	0	0.120793	0.77842	0.127398	0	0.256611		clpP	ATP-dependent Clp protease proteolytic subunit	GO:0009570,GO:0004252	chloroplast stroma|serine-type endopeptidase activity
Soltu.DM.01G010350	25.2199	21.3264	29.1134	1.36649	0.450479	0.380715	0.565472	Up	1.62885	2.51326	3.13472	2.05214	1.92937	1.37784
Soltu.DM.01G010360	1362.31	1308.9	1415.72	1.0815	0.113027	0.228745	0.399424	Up	22.3774	20.3869	21.0675	20.6841	19.7077	18.9985	102586030	PP2A	Serine/threonine-protein phosphatase PP2A catalytic subunit	GO:0005737,GO:0046872,GO:0004721	cytoplasm|metal ion binding|phosphoprotein phosphatase activity	sot03015,sot04136	mRNA surveillance pathway|Autophagy - other
Soltu.DM.01G010370	834.968	822.267	847.668	1.031	0.0440413	0.686363	0.812599	Up	8.36176	8.04444	9.13832	8.71109	8.18025	8.0464	102586365
Soltu.DM.01G010720	59.3941	64.4156	54.3727	0.843282	-0.245914	0.480214	0.655155	Down	1.41199	1.18963	1.46826	1.61315	2.07034	1.16046	102578201
Soltu.DM.01G010740	1590.29	1335.02	1845.55	1.38256	0.467347	5.12e-06	3.98e-05	Up	17.9624	17.53	17.7881	12.1479	11.7461	14.93	102596946	PUB4	U-box domain-containing protein 4	GO:0005737,GO:0005634,GO:0004842	cytoplasm|nucleus|ubiquitin-protein transferase activity
Soltu.DM.01G010750	9124.93	7807.53	10442.3	1.33746	0.4195	4.04e-08	4.47e-07	Up	165.38	174.249	186.162	125.727	138.886	130.995	102596607	ANT1	ADP,ATP carrier protein, mitochondrial	GO:0016021,GO:0005743,GO:0022857	integral component of membrane|mitochondrial inner membrane|transmembrane transporter activity
Soltu.DM.01G010760	15706.7	16863.5	14549.8	0.862776	-0.212942	0.00398382	0.015914	Down	613.961	588.456	530.029	663.076	683.419	674.448	102596059	SAP8	Zinc finger A20 and AN1 domain-containing stress-associated protein 8	GO:0003677,GO:0008270	DNA binding|zinc ion binding
Soltu.DM.01G010820	89.9226	100.743	79.1026	0.785039	-0.349163	0.189077	0.35117	Down	1.03481	0.929675	1.01872	1.36755	1.28574	1.1694	102597595	IRKI	IRK-interacting protein
Soltu.DM.01G011060	5.60288	5.31119	5.89458	1.10994	0.150483	0.895891	0.942346	Up	0.10052	0.443617	0.0314151	0.100258	0.219941	0.201946	107061850
Soltu.DM.01G011130	224.119	238.331	209.907	0.880253	-0.18401	0.320567	0.504388	Down	4.29649	3.66585	3.72392	3.8282	4.61983	4.91046	102593539	LECRK3	G-type lectin S-receptor-like serine/threonine-protein kinase LECRK3	GO:0016021,GO:0005524,GO:0030246,GO:0004674,GO:0006952	integral component of membrane|ATP binding|carbohydrate binding|protein serine/threonine kinase activity|defense response
Soltu.DM.01G011140	89.9626	90.1517	89.7735	0.996139	-0.00558136	0.986498	0.993298	Down	0.892952	1.04611	1.54946	0.717817	1.33725	1.47264	102593201	LECRK3	G-type lectin S-receptor-like serine/threonine-protein kinase LECRK3	GO:0016021,GO:0005886,GO:0005524,GO:0030246,GO:0004674,GO:0006952,GO:0006468	integral component of membrane|plasma membrane|ATP binding|carbohydrate binding|protein serine/threonine kinase activity|defense response|protein phosphorylation
Soltu.DM.01G011150	397.335	425.317	369.352	0.868742	-0.203	0.14616	0.293045	Down	4.51973	5.0982	5.0417	5.58062	5.41272	6.00329		TOP6B	DNA topoisomerase 6 subunit B	GO:0005829,GO:0009330,GO:0005634,GO:0005524,GO:0003677,GO:0003918,GO:0042802,GO:0000902,GO:0042023,GO:0006265,GO:0007389,GO:0009741,GO:0010026	cytosol|DNA topoisomerase complex (ATP-hydrolyzing)|nucleus|ATP binding|DNA binding|DNA topoisomerase type II (ATP-hydrolyzing) activity|identical protein binding|cell morphogenesis|DNA endoreduplication|DNA topological change|pattern specification process|response to brassinosteroid|trichome differentiation
Soltu.DM.01G011160	447.669	440.952	454.386	1.03069	0.0436051	0.766915	0.865749	Up	10.0939	9.65793	11.7128	9.21477	9.79932	11.7377	102592185	TOP6B	DNA topoisomerase 6 subunit B	GO:0005829,GO:0009330,GO:0005634,GO:0005524,GO:0003677,GO:0003918,GO:0042802,GO:0000902,GO:0042023,GO:0006265,GO:0007389,GO:0009741,GO:0010026	cytosol|DNA topoisomerase complex (ATP-hydrolyzing)|nucleus|ATP binding|DNA binding|DNA topoisomerase type II (ATP-hydrolyzing) activity|identical protein binding|cell morphogenesis|DNA endoreduplication|DNA topological change|pattern specification process|response to brassinosteroid|trichome differentiation
Soltu.DM.01G011170	1156.98	1120.25	1193.72	1.06551	0.0915502	0.414524	0.596974	Up	10.779	11.8548	9.37316	10.65	10.1164	9.46023	102591852	EIL3	ETHYLENE INSENSITIVE 3-like 3 protein	GO:0005634,GO:0003677,GO:0003700,GO:0071281,GO:0009873,GO:0042762,GO:0006355	nucleus|DNA binding|DNA-binding transcription factor activity|cellular response to iron ion|ethylene-activated signaling pathway|regulation of sulfur metabolic process|regulation of transcription, DNA-templated	sot04016,sot04075	MAPK signaling pathway - plant|Plant hormone signal transduction
Soltu.DM.01G011230	2.71044	3.03872	2.38215	0.780099	-0.358271	0.826309	0.901817	Down	0.17514	0.0276046	0	0.116456	0.0273722	0.117286	102587474	YSL7	Probable metal-nicotianamine transporter YSL7	GO:0016021,GO:0005886,GO:0055085	integral component of membrane|plasma membrane|transmembrane transport
Soltu.DM.01G011240	4.68344	3.04411	6.32278	2.08103	1.0573	0.42498	0.606515	Up	0.500839	0.368384	0.156524	0.44403	0.0521832	0	102596429
Soltu.DM.01G011250	83.6034	40.3045	126.902	3.15529	1.65777	3.78e-07	3.58e-06	Up	6.67351	9.40814	6.77832	3.08154	1.50654	2.73108	102590001
Soltu.DM.01G011420	714.011	747.117	680.904	0.911654	-0.133442	0.354582	0.540116	Down	3.84372	4.60914	4.32815	4.09056	4.21413	5.8271	102597447	ROQ1	Disease resistance protein Roq1
Soltu.DM.01G011430	402.304	452.128	352.481	0.779595	-0.359204	0.013851	0.0456832	Down	8.52661	9.51446	7.80568	10.3357	10.9203	12.1274			Zinc finger CCCH domain-containing protein 31	GO:0003677,GO:0046872,GO:0003723	DNA binding|metal ion binding|RNA binding
Soltu.DM.01G011440	80.925	84.3374	77.5125	0.918843	-0.12211	0.710961	0.829092	Down	2.28973	3.56238	2.49305	3.20464	3.91333	2.00326	102597120		Zinc finger CCCH domain-containing protein 52	GO:0005634,GO:0003677,GO:0003700,GO:0046872,GO:0003723,GO:1900057,GO:0006355	nucleus|DNA binding|DNA-binding transcription factor activity|metal ion binding|RNA binding|positive regulation of leaf senescence|regulation of transcription, DNA-templated
Soltu.DM.01G011500	6216.18	5284.88	7147.47	1.35246	0.435587	3.77e-07	3.57e-06	Up	47.0378	53.1093	51.0684	40.0032	38.4265	34.0632	102596256
Soltu.DM.01G011640	2.51942	1.69563	3.34322	1.97514	0.981955	0.583884	0.737948	Up	0.483861	0	0.302437	0.0804333	0	0.324026	102602431	MED15A	Mediator of RNA polymerase II transcription subunit 15a	GO:0016592,GO:0005634,GO:0031490,GO:0003713,GO:0045723,GO:0009751	mediator complex|nucleus|chromatin DNA binding|transcription coactivator activity|positive regulation of fatty acid biosynthetic process|response to salicylic acid
Soltu.DM.01G011750	462.912	453.69	472.134	1.04119	0.0582343	0.694184	0.818293	Up	8.17107	9.88551	9.99176	8.45463	8.21634	10.4799	102578980	RING1	E3 ubiquitin-protein ligase RING1	GO:0046872,GO:0061630,GO:0004842,GO:0090378	metal ion binding|ubiquitin protein ligase activity|ubiquitin-protein transferase activity|seed trichome elongation
Soltu.DM.01G011790	2.34449	1.69428	2.9947	1.77069	0.824308	0.677029	0.806029	Up	0.119322	0.141052	0	0	0	0.149824			F-box/LRR-repeat protein At3g48880
Soltu.DM.01G011910	358.919	366.817	351.02	0.956299	-0.0644656	0.699031	0.82129	Down	25.7782	25.8556	21.0397	23.0904	30.033	23.2549	102582163	RPP1C	60S acidic ribosomal protein P1-3	GO:0005829,GO:0022625,GO:0022626,GO:0005634,GO:0005886,GO:0030295,GO:0043021,GO:0003735,GO:0002181,GO:0006414	cytosol|cytosolic large ribosomal subunit|cytosolic ribosome|nucleus|plasma membrane|protein kinase activator activity|ribonucleoprotein complex binding|structural constituent of ribosome|cytoplasmic translation|translational elongation	sot03010	Ribosome
Soltu.DM.01G012010	3.7489	1.93495	5.56285	2.84959	1.51075	0.316489	0.499709	Up	0.177041	0.167425	0.373475	0	0.249023	0	107059009	PCMP-E13	Pentatricopeptide repeat-containing protein At5g56310
Soltu.DM.01G012060	1261.35	1235.89	1286.81	1.04109	0.0580881	0.540436	0.703753	Up	28.458	29.3956	26.3448	26.705	27.6749	27.0081	102603953	RFC3	Replication factor C subunit 3	GO:0005663,GO:0005634,GO:0005524,GO:0003677,GO:0006261	DNA replication factor C complex|nucleus|ATP binding|DNA binding|DNA-dependent DNA replication	sot03030,sot03420,sot03430	DNA replication|Nucleotide excision repair|Mismatch repair
Soltu.DM.01G012080	30.5637	33.2502	27.8771	0.840186	-0.251219	0.600253	0.750187	Down	2.89615	4.30391	4.00839	4.81434	2.71579	5.95692
Soltu.DM.01G012100	2.81451	3.29307	2.33595	0.705432	-0.503421	0.744433	0.851377	Down	0.124799	0	0.0877563	0.0622369	0.175541	0.0626805	107059005	PCMP-E27	Pentatricopeptide repeat-containing protein At3g29230
Soltu.DM.01G012110	8.13789	10.0606	6.21523	0.619512	-0.690796	0.435312	0.615424	Down	0.257187	0.425633	0.482265	0.448905	0.422049	1.03338
Soltu.DM.01G012170	2.16678	3.32311	1.01045	0.301665	-1.72898	0.36598	0.55118	Down	0.0806435	0.0381317	0	0	0.151243	0.24302	102578915
Soltu.DM.01G012180	4.56685	7.11597	2.01772	0.282504	-1.82366	0.26418	0.441318	Down	0.0833512	0.019706	0.019537	0	0	0.439564	102586016
Soltu.DM.01G012220	13.1057	6.07206	20.1393	3.32724	1.73433	0.0292908	0.0840231	Up	0.427474	0.210916	0.453065	0.0741495	0.0348567	0.224034		TAA1	L-tryptophan--pyruvate aminotransferase 1	GO:0005737,GO:0016846,GO:0004021,GO:0080100,GO:0050048,GO:0080099,GO:0080130,GO:0047312,GO:0050362,GO:0080097,GO:0004838,GO:0080098,GO:0030170,GO:0009926,GO:0042742,GO:0009908,GO:0048467,GO:0009684,GO:0048366,GO:0010078,GO:0010087,GO:0009958,GO:0009723,GO:0048364,GO:0009641,GO:0048367	cytoplasm|carbon-sulfur lyase activity|L-alanine:2-oxoglutarate aminotransferase activity|L-glutamine:2-oxoglutarate aminotransferase activity|L-leucine:2-oxoglutarate aminotransferase activity|L-methionine:2-oxoglutarate aminotransferase activity|L-phenylalanine:2-oxoglutarate aminotransferase activity|L-phenylalanine:pyruvate aminotransferase activity|L-tryptophan:2-oxoglutarate aminotransferas…
Soltu.DM.01G012370	30.8384	34.0576	27.6192	0.808609	-0.306486	0.577682	0.733301	Down	5.19051	1.40246	3.36019	3.57458	6.25792	2.4828
Soltu.DM.01G012410	36.5016	35.6871	37.3161	1.04685	0.0660486	0.879883	0.933298	Up	0.716561	1.16554	1.23617	0.743281	0.994467	1.26683	102605506					sot02010	ABC transporters
Soltu.DM.01G012430	4.44805	4.95866	3.93744	0.793289	-0.334081	0.773439	0.870209	Down	0.196881	0.310313	0.246121	0.32728	0.492321	0.131845
Soltu.DM.01G012440	7.47783	6.96445	7.99121	1.14352	0.193484	0.838733	0.908761	Up	0.471864	0.223118	0.221204	0.352976	0.368732	0.0789982
Soltu.DM.01G012450	2.14614	2.00175	2.29052	1.14575	0.196297	0.912039	0.951049	Up	0.0293702	0.16665	0	0.0292936	0.0550823	0.0885072	107058843
Soltu.DM.01G012470	555.04	531.485	578.595	1.08833	0.122111	0.377815	0.562112	Up	6.76967	7.4023	5.65286	6.07214	6.52442	5.72582
Soltu.DM.01G012500	23.9516	26.4417	21.4615	0.811696	-0.300988	0.620939	0.765385	Down	0.929463	1.54868	0.29048	1.58921	0.954588	0.889189
Soltu.DM.01G012530	31.1884	22.8489	39.5278	1.7247	0.786347	0.11137	0.239954	Up	1.13185	0.733406	0.550249	0.3763	0.668267	0.357928	107058820	PCMP-E13	Pentatricopeptide repeat-containing protein At5g56310
Soltu.DM.01G012540	6.93336	4.65118	9.21553	1.97895	0.984738	0.290919	0.471608	Up	0.738305	0.543049	0.922955	0.32728	0.461551	0.329613
Soltu.DM.01G012550	290.071	316.669	263.474	0.832191	-0.265013	0.105093	0.229677	Down	6.71096	6.49521	6.93106	7.60859	7.44839	9.32178	107059004	PCMP-E19	Pentatricopeptide repeat-containing protein At2g33680
Soltu.DM.01G012570	37.6666	40.3531	34.9801	0.868184	-0.203928	0.632668	0.773853	Down	1.89716	3.67368	3.64217	3.69433	3.64275	3.35767	102598830
Soltu.DM.01G012610	70.91	76.9385	64.8815	0.842786	-0.246761	0.431035	0.611569	Down	5.65232	3.92442	3.95783	6.06576	4.5623	5.53403	102585856	PGI1	Glucose-6-phosphate isomerase 1, chloroplastic	GO:0009507,GO:0009941,GO:0009570,GO:0005829,GO:0009536,GO:0004347,GO:0016866,GO:0048029,GO:0006094,GO:0051156,GO:0006096,GO:0009911,GO:0005982	chloroplast|chloroplast envelope|chloroplast stroma|cytosol|plastid|glucose-6-phosphate isomerase activity|intramolecular transferase activity|monosaccharide binding|gluconeogenesis|glucose 6-phosphate metabolic process|glycolytic process|positive regulation of flower development|starch metabolic process	sot00010,sot00030,sot00500,sot00520	Glycolysis / Gluconeogenesis|Pentose phosphate pathway|Starch and sucrose metabolism|Amino sugar and nucleotide sugar metabolism
Soltu.DM.01G012700	24.509	21.9359	27.0821	1.23559	0.305203	0.59346	0.74496	Up	0.365997	1.32679	0.714895	0.669246	0.800811	0.490194
Soltu.DM.01G012720	233.088	215.113	251.063	1.16713	0.222968	0.255629	0.431178	Up	4.95867	4.01944	3.98497	3.56801	3.08884	4.53627		KIN14T	Kinesin-like protein KIN-14T	GO:0005871,GO:0005874,GO:0005739,GO:0005524,GO:0016887,GO:0008017,GO:0003777,GO:0007018	kinesin complex|microtubule|mitochondrion|ATP binding|ATPase activity|microtubule binding|microtubule motor activity|microtubule-based movement
Soltu.DM.01G012730	21.7055	14.9101	28.5009	1.90973	0.933371	0.108997	0.236176	Up	0.418064	0.508317	0.727937	0.317695	0.410697	0.139982
Soltu.DM.01G012740	47.8716	48.376	47.3673	0.97812	-0.0319169	0.934515	0.963466	Down	0.710064	0.656237	0.862433	0.579447	1.0593	0.648419	102602128	PCMP-E13	Pentatricopeptide repeat-containing protein At5g56310
Soltu.DM.01G012750	329.803	295.604	364.002	1.23195	0.300938	0.0594951	0.148599	Up	2.85215	3.13709	3.32411	2.89723	2.37827	2.33607		QKY	Protein QUIRKY	GO:0016021,GO:0005886,GO:0009506,GO:0099402	integral component of membrane|plasma membrane|plasmodesma|plant organ development
Soltu.DM.01G012790	2.10357	1.93495	2.27219	1.17097	0.227708	0.920665	0.955981	Up	0	0.219235	0	0	0.186334	0	102601795	DIR19	Dirigent protein 19	GO:0048046	apoplast
Soltu.DM.01G012810	1.84171	2.69448	0.988942	0.367437	-1.44443	0.462398	0.638399	Down	0.0436511	0.0412802	0.0409261	0	0.0409327	0.306933	102604723	PCMP-E44	Pentatricopeptide repeat-containing protein At2g36730
Soltu.DM.01G012820	1174.44	1319.22	1029.66	0.780425	-0.357667	0.000925839	0.00447108	Down	17.7692	20.1441	17.0202	21.9574	25.4486	23.419		HAKAI	E3 ubiquitin-protein ligase HAKAI homolog
Soltu.DM.01G012830	190.738	208.756	172.721	0.826701	-0.274562	0.210755	0.377408	Down	15.7088	10.4989	11.8251	17.5511	15.9345	12.745	102601461	HAKAI	E3 ubiquitin-protein ligase HAKAI homolog
Soltu.DM.01G013010	6.60476	8.36358	4.84595	0.582045	-0.780797	0.487879	0.662057	Down	0.0174284	0.0164818	0.212426	0.0869151	0.114402	0.22759			Eukaryotic translation initiation factor 5B	GO:0005737,GO:0005525,GO:0003924,GO:0046872,GO:0003743	cytoplasm|GTP binding|GTPase activity|metal ion binding|translation initiation factor activity
Soltu.DM.01G013080	213.511	216.743	210.278	0.970938	-0.0425487	0.833504	0.906184	Down	4.01632	5.3304	4.64281	4.62038	4.06578	5.8453	102600214	TSC10B	3-dehydrosphinganine reductase TSC10B	GO:0005783,GO:0005789,GO:0016021,GO:0047560,GO:0006666,GO:0030148	endoplasmic reticulum|endoplasmic reticulum membrane|integral component of membrane|3-dehydrosphinganine reductase activity|3-keto-sphinganine metabolic process|sphingolipid biosynthetic process	sot00600	Sphingolipid metabolism
Soltu.DM.01G013250	46.3578	46.7232	45.9924	0.982646	-0.025256	0.954888	0.975111	Down	3.13662	2.06349	0.895031	1.76825	2.00349	2.4658
Soltu.DM.01G013260	384.077	448.848	319.305	0.711063	-0.49195	0.00106501	0.00505516	Down	5.62633	4.47068	5.39996	7.08929	7.78905	7.0395	102599554
Soltu.DM.01G013270	517.58	515.118	520.043	1.00915	0.0131398	0.927512	0.959801	Up	27.747	20.493	23.1881	25.4193	23.7661	22.0041			Uncharacterized protein At5g01610
Soltu.DM.01G013350	13.5148	10.085	16.9446	1.68566	0.753318	0.325421	0.509483	Up	0.238894	1.2049	0.522621	0.516254	0.224017	0.439944
Soltu.DM.01G013380	46.7423	52.5257	40.9589	0.779668	-0.359067	0.349918	0.535252	Down	4.42821	2.5839	4.24011	5.45035	4.06409	5.01599
Soltu.DM.01G013390	23.7025	25.5287	21.8762	0.856849	-0.222887	0.688935	0.81443	Down	1.73017	1.11028	1.10075	2.46523	0.985042	1.17933
Soltu.DM.01G013400	175.105	192.486	157.724	0.818859	-0.288312	0.169761	0.326063	Down	1.87727	1.49168	1.73925	1.73943	2.28118	2.25394	102596716		F-box/kelch-repeat protein At1g55270
Soltu.DM.01G013430	476.282	511.761	440.804	0.861073	-0.215792	0.106437	0.231834	Down	50.4993	43.257	45.2178	56.9468	54.2498	51.1612
Soltu.DM.01G013440	922.02	1006.21	837.829	0.832778	-0.263996	0.0138658	0.0457199	Down	16.0902	18.0499	15.9901	19.7123	19.2836	21.6258		TPS32	Viridiflorene synthase	GO:0005737,GO:0016838,GO:0000287,GO:0010334,GO:0045339,GO:0051762,GO:0016114	cytoplasm|carbon-oxygen lyase activity, acting on phosphates|magnesium ion binding|sesquiterpene synthase activity|farnesyl diphosphate catabolic process|sesquiterpene biosynthetic process|terpenoid biosynthetic process
Soltu.DM.01G013450	124.459	91.412	157.507	1.72184	0.783951	0.00184002	0.00814352	Up	12.1053	9.42762	8.19358	4.97154	5.70607	6.69765
Soltu.DM.01G013460	1822.56	1884.11	1761.01	0.93465	-0.0975025	0.284155	0.464689	Down	27.9924	28.573	24.9059	29.7079	27.8116	30.2385	102579512		Serine/threonine-protein phosphatase PP2A catalytic subunit	GO:0005737,GO:0046872,GO:0004721	cytoplasm|metal ion binding|phosphoprotein phosphatase activity	sot03015,sot04136	mRNA surveillance pathway|Autophagy - other
Soltu.DM.01G013530	95.7306	90.5258	100.935	1.11481	0.156792	0.565895	0.723885	Up	2.03913	2.18549	2.4429	1.53666	2.25208	2.23038	102579188
Soltu.DM.01G013570	24.9393	13.9385	35.9401	2.57398	1.364	0.0131274	0.043684	Up	2.23567	1.13844	2.63357	0.743281	1.02134	0.57583
Soltu.DM.01G013580	26.0906	13.5643	38.6169	2.84199	1.5069	0.00511927	0.0197591	Up	0.403612	0.601897	0.742278	0.170314	0.305693	0.140341
Soltu.DM.01G013590	15.6445	3.03469	28.2543	9.36493	3.22727	6.81e-05	0.000425658	Up	1.17041	1.78057	1.24048	0.0507547	0.0477183	0.357815
Soltu.DM.01G013600	8.83494	5.97388	11.696	1.95935	0.970378	0.284202	0.464735	Up	0.164068	0.982659	0.717854	0.218187	0.410268	0.329613
Soltu.DM.01G013660	921.803	915.39	928.216	1.01373	0.0196765	0.849874	0.915794	Up	9.9849	9.2738	9.15487	9.25726	9.80614	9.1334	102599189	POLH	DNA polymerase eta	GO:0005634,GO:0005657,GO:0035861,GO:0003684,GO:0003887,GO:0046872,GO:0006260,GO:0042276,GO:0009314,GO:0010224,GO:0009650	nucleus|replication fork|site of double-strand break|damaged DNA binding|DNA-directed DNA polymerase activity|metal ion binding|DNA replication|error-prone translesion synthesis|response to radiation|response to UV-B|UV protection
Soltu.DM.01G013710	1.35141	2.38141	0.321417	0.148981	-2.7468	0.315005	0.498335	Down	0	0	0.0072418	0.0539269	0	0	107057732		Probable LRR receptor-like serine/threonine-protein kinase At3g47570
Soltu.DM.01G013720	6.79431	2.7039	10.8847	4.04306	2.01545	0.0736814	0.175188	Up	0.570956	0.638117	0.437984	0.362389	0.0486727	0
Soltu.DM.01G013760	223.677	246.709	200.645	0.813619	-0.297574	0.0893876	0.203929	Down	11.1122	12.5407	12.2604	15.3083	14.2197	14.924		ATX4	Histone-lysine N-methyltransferase ATX4	GO:0005634,GO:0018024,GO:0046872,GO:0051571	nucleus|histone-lysine N-methyltransferase activity|metal ion binding|positive regulation of histone H3-K4 methylation
Soltu.DM.01G013770	9.55513	7.00122	12.109	1.73097	0.791581	0.374066	0.559033	Up	0.258644	0.428043	0.454683	0.386954	0.242537	0.032476	102599229
Soltu.DM.01G013880	5.63751	6.63658	4.63844	0.697002	-0.520766	0.610846	0.757939	Down	0.331951	0.156961	0.259357	0.275905	0.466918	0.333446	102579543
Soltu.DM.01G013890	10.59	8.34453	12.8355	1.53854	0.621565	0.451793	0.629158	Up	0.37251	0.640505	0.254004	0.101329	0.254045	0.476238	102579132					sot03060	Protein export
Soltu.DM.01G013980	373.051	321.225	424.877	1.3223	0.40305	0.00605208	0.0227999	Up	5.2923	4.32491	4.98403	3.67967	3.72481	3.7059	102600624	MAG5	Protein transport protein SEC16A homolog	GO:0070971,GO:0012507,GO:0000139,GO:0005795,GO:0048208,GO:0007029,GO:0007030,GO:0070863,GO:0070973,GO:0015031	endoplasmic reticulum exit site|ER to Golgi transport vesicle membrane|Golgi membrane|Golgi stack|COPII vesicle coating|endoplasmic reticulum organization|Golgi organization|positive regulation of protein exit from endoplasmic reticulum|protein localization to endoplasmic reticulum exit site|protein transport
Soltu.DM.01G014010	215.069	256.839	173.299	0.675068	-0.566894	0.00387023	0.0155155	Down	2.34109	3.01032	3.15819	3.66206	4.54853	4.48332		LIG4	DNA ligase 4	GO:0048046,GO:0032807,GO:0009506,GO:0005524,GO:0003677,GO:0003910,GO:0046872,GO:0006974,GO:0071897,GO:0051103,GO:0006310,GO:0006260,GO:0006302,GO:0006303,GO:0006297,GO:0010165	apoplast|DNA ligase IV complex|plasmodesma|ATP binding|DNA binding|DNA ligase (ATP) activity|metal ion binding|cellular response to DNA damage stimulus|DNA biosynthetic process|DNA ligation involved in DNA repair|DNA recombination|DNA replication|double-strand break repair|double-strand break repair via nonhomologous end joining|nucleotide-excision repair, DNA gap filling|response to X-ray
Soltu.DM.01G014020	53.8416	53.757	53.9262	1.00182	0.00261671	0.995208	0.997804	Up	6.05559	4.68548	1.62216	4.94166	3.98231	3.47592		LIG4	Putative DNA ligase 4	GO:0032807,GO:0005524,GO:0003677,GO:0003910,GO:0046872,GO:0051103,GO:0006310,GO:0006260,GO:0006303,GO:0006297	DNA ligase IV complex|ATP binding|DNA binding|DNA ligase (ATP) activity|metal ion binding|DNA ligation involved in DNA repair|DNA recombination|DNA replication|double-strand break repair via nonhomologous end joining|nucleotide-excision repair, DNA gap filling
Soltu.DM.01G014030	23.3139	29.6597	16.9682	0.570766	-0.809029	0.179154	0.338909	Down	3.01137	1.36695	1.5811	5.16606	3.84042	1.45197
Soltu.DM.01G014040	9.66268	11.0892	8.23613	0.743741	-0.427127	0.592506	0.744286	Down	0.875028	0.93094	0.820404	1.7455	0.717969	1.09871	102588737
Soltu.DM.01G014050	2.63296	2.30788	2.95805	1.27893	0.354935	0.827874	0.903005	Up	0.26071	0.862926	0	0.130015	0.488949	0.261884	102578397	LIG4	Putative DNA ligase 4	GO:0032807,GO:0005524,GO:0003677,GO:0003910,GO:0046872,GO:0051103,GO:0006310,GO:0006260,GO:0006303,GO:0006297	DNA ligase IV complex|ATP binding|DNA binding|DNA ligase (ATP) activity|metal ion binding|DNA ligation involved in DNA repair|DNA recombination|DNA replication|double-strand break repair via nonhomologous end joining|nucleotide-excision repair, DNA gap filling	sot03450	Non-homologous end-joining
Soltu.DM.01G014120	4.20678	4.733	3.68055	0.776851	-0.364289	0.790542	0.881278	Down	0.383192	0.301983	0	0.254795	0.0598881	0.577376	107062054	VAMP714	Vesicle-associated membrane protein 714	GO:0005794,GO:0000139,GO:0016021,GO:0031201,GO:0005773,GO:0005484,GO:0000149,GO:0006887,GO:0015031,GO:0009651,GO:0006906	Golgi apparatus|Golgi membrane|integral component of membrane|SNARE complex|vacuole|SNAP receptor activity|SNARE binding|exocytosis|protein transport|response to salt stress|vesicle fusion
Soltu.DM.01G014160	4.7459	6.09919	3.3926	0.553894	-0.852319	0.532286	0.697836	Down	0.725023	0.171411	0	1.0847	0.084984	0.45518	102601350
Soltu.DM.01G014190	13.4387	13.4859	13.3915	0.996276	-0.00538239	0.994388	0.997337	Down	0.420594	0.646343	0.985845	0.524372	0.246501	1.32027	102582879
Soltu.DM.01G014210	5.54819	6.75785	4.33853	0.641284	-0.640965	0.55921	0.718124	Down	0.148686	0.0602618	0.0597448	0.211856	0.0398363	0.170692	102586966
Soltu.DM.01G014290	1.95824	2.27516	1.64132	0.718988	-0.475961	0.811385	0.893622	Down	0.0134279	0.0507945	0	0.0133929	0.0755503	0	102594494					sot03060	Protein export
Soltu.DM.01G014300	4.16175	6.03934	2.28416	0.379799	-1.39669	0.264647	0.441859	Down	0.0906279	0.342822	0.169941	0.361567	0.339936	0.91036
Soltu.DM.01G014310	15.0584	17.3952	12.7216	0.733377	-0.447374	0.502524	0.673928	Down	0.333892	0.947273	0.782622	0.832555	0.782748	1.22978
Soltu.DM.01G014340	109.47	121.08	97.8604	0.808292	-0.307051	0.733766	0.844401	Down	0.644817	2.34679	2.58314	2.49459	3.86616	0.549581
Soltu.DM.01G014410	178.425	189.972	166.877	0.879024	-0.186025	0.35185	0.537177	Down	3.22613	4.19226	3.87341	4.39833	4.11343	4.42968
Soltu.DM.01G014430	391.98	418.022	365.937	0.875505	-0.191813	0.169377	0.325603	Down	4.61879	4.76277	4.53842	5.15332	5.05302	5.80604	102594818					sot03060	Protein export
Soltu.DM.01G014440	445.244	483.718	406.771	0.840562	-0.250574	0.0619909	0.153267	Down	13.0373	11.6074	11.5651	14.2215	15.0313	14.0775
Soltu.DM.01G014450	179.552	171.274	187.83	1.09672	0.133191	0.507735	0.677794	Up	9.31347	10.0043	8.39987	9.5921	8.16389	7.67753	102589389	GOT1	Vesicle transport protein GOT1	GO:0000139,GO:0016021,GO:0016192	Golgi membrane|integral component of membrane|vesicle-mediated transport
Soltu.DM.01G014500	8.11691	4.41589	11.8179	2.69099	1.42814	0.152926	0.302774	Up	0.14324	0.13546	0.214878	0.114294	0	0.0719426	102589713	IQM2	IQ domain-containing protein IQM2	GO:0005737,GO:0005634	cytoplasm|nucleus
Soltu.DM.01G014580	1669.46	1495.6	1843.32	1.23255	0.301651	0.000813736	0.00399299	Up	17.4865	17.7465	16.458	14.9658	13.3579	13.8937	102590045	ATJ49	Chaperone protein dnaJ 49	GO:0016021	integral component of membrane
Soltu.DM.01G014620	1170.94	1144.49	1197.39	1.04631	0.0653156	0.510178	0.679737	Up	10.1099	10.6435	11.4784	9.81651	10.5279	10.6655	102591171	ARI8	Probable E3 ubiquitin-protein ligase ARI8	GO:0005737,GO:0000151,GO:0046872,GO:0031624,GO:0061630,GO:0004842,GO:0032436,GO:0000209,GO:0006511	cytoplasm|ubiquitin ligase complex|metal ion binding|ubiquitin conjugating enzyme binding|ubiquitin protein ligase activity|ubiquitin-protein transferase activity|positive regulation of proteasomal ubiquitin-dependent protein catabolic process|protein polyubiquitination|ubiquitin-dependent protein catabolic process
Soltu.DM.01G014670	15193.3	15687	14699.6	0.937056	-0.093793	0.201527	0.366409	Down	116.142	128.051	122.548	123.803	137.838	132.241	102592059	sal3	Importin subunit beta-3	GO:0005737,GO:0005829,GO:0005635,GO:0031965,GO:0034399,GO:0005643,GO:0005634,GO:0005525,GO:0061608,GO:0008139,GO:0006607,GO:0006606,GO:0010389,GO:0006610	cytoplasm|cytosol|nuclear envelope|nuclear membrane|nuclear periphery|nuclear pore|nucleus|GTP binding|nuclear import signal receptor activity|nuclear localization sequence binding|NLS-bearing protein import into nucleus|protein import into nucleus|regulation of G2/M transition of mitotic cell cycle|ribosomal protein import into nucleus	sot03013	Nucleocytoplasmic transport
Soltu.DM.01G014680	882.81	896.591	869.03	0.96903	-0.0453867	0.689699	0.814953	Down	92.6496	94.441	77.846	87.819	94.2342	93.0668
Soltu.DM.01G014690	17.6605	17.3175	18.0036	1.04057	0.0573765	0.925281	0.958597	Up	0.539563	1.29884	0.735826	0.88062	0.91993	0.689809		psbA	Photosystem II protein D1	GO:0009535,GO:0016021,GO:0009523,GO:0016168,GO:0045156,GO:0005506,GO:0016682,GO:0009772,GO:0018298,GO:0009635	chloroplast thylakoid membrane|integral component of membrane|photosystem II|chlorophyll binding|electron transporter, transferring electrons within the cyclic electron transport pathway of photosynthesis activity|iron ion binding|oxidoreductase activity, acting on diphenols and related substances as donors, oxygen as acceptor|photosynthetic electron transport in photosystem II|protein-chromophor…
Soltu.DM.01G014700	1143.62	1139.13	1148.1	1.00796	0.0114423	0.907726	0.949315	Up	18.8194	17.4959	19.8305	18.8038	17.8362	19.4433	102592389	FLACCA	Molybdenum cofactor sulfurase	GO:0016829,GO:0008265,GO:0102867,GO:0030151,GO:0030170,GO:0006777	lyase activity|Mo-molybdopterin cofactor sulfurase activity|molybdenum cofactor sulfurtransferase activity|molybdenum ion binding|pyridoxal phosphate binding|Mo-molybdopterin cofactor biosynthetic process
Soltu.DM.01G014730	46.6884	51.4831	41.8936	0.813763	-0.297319	0.424412	0.606071	Down	2.43431	2.09281	2.23047	3.4764	2.49023	2.38969	102592962	LBD12	LOB domain-containing protein 12	GO:0003677,GO:0009965,GO:0010016	DNA binding|leaf morphogenesis|shoot system morphogenesis
Soltu.DM.01G014740	841.359	889.264	793.453	0.892207	-0.16455	0.132889	0.273319	Down	30.0308	26.2259	29.5118	33.7983	31.1853	31.7674	102593296
Soltu.DM.01G014950	429.748	196.731	662.765	3.37087	1.75312	7.52e-31	5.09e-29	Up	8.66658	10.7245	11.0012	3.15325	2.81712	3.11253	102593623	CYP716A12	Beta-amyrin 28-monooxygenase	GO:0016021,GO:0020037,GO:0005506,GO:0016709,GO:0016135	integral component of membrane|heme binding|iron ion binding|oxidoreductase activity,acting on paired donors, with incorporation or reduction of molecular oxygen, NAD(P)H as one donor, and incorporation of one atom of oxygen|saponin biosynthetic process
Soltu.DM.01G014960	386.12	379.628	392.613	1.03498	0.0496042	0.828261	0.903388	Up	3.11998	6.76161	4.99724	5.27717	3.60834	5.61513	102603108		Transketolase, chloroplastic	GO:0009535,GO:0046872,GO:0004802,GO:0019253	chloroplast thylakoid membrane|metal ion binding|transketolase activity|reductive pentose-phosphate cycle	sot00030,sot00710	Pentose phosphate pathway|Carbon fixation in photosynthetic organisms
Soltu.DM.01G014970	1.97598	2.6631	1.28885	0.487011	-1.03797	0.566598	0.724483	Down	0	0.052729	0.15683	0.0556121	0.156855	0.224034		CYP716A15	Beta-amyrin 28-monooxygenase	GO:0016021,GO:0020037,GO:0005506,GO:0004497,GO:0016709,GO:0016132,GO:0010268,GO:0007275,GO:0055114,GO:0016135,GO:0016125	integral component of membrane|heme binding|iron ion binding|monooxygenase activity|oxidoreductase activity,acting on paired donors, with incorporation or reduction of molecular oxygen, NAD(P)H as one donor, and incorporation of one atom of oxygen|brassinosteroid biosynthetic process|brassinosteroid homeostasis|multicellular organism development|oxidation-reduction process|saponin biosynthetic pr…
Soltu.DM.01G015000	2948.22	4793.32	1103.12	0.230103	-2.11965	6.39e-75	1.95e-72	Down	12.3772	13.0784	9.39949	56.3631	48.6413	47.4237	102594160	CYP716A12	Beta-amyrin 28-monooxygenase	GO:0016021,GO:0020037,GO:0005506,GO:0016709,GO:0016135	integral component of membrane|heme binding|iron ion binding|oxidoreductase activity,acting on paired donors, with incorporation or reduction of molecular oxygen, NAD(P)H as one donor, and incorporation of one atom of oxygen|saponin biosynthetic process
Soltu.DM.01G015090	47127.9	48597.8	45658.1	0.939512	-0.0900161	0.172048	0.329227	Down	534.375	549.861	555.888	610.12	585.912	560.766	102577525	CPN60B2	Chaperonin 60 subunit beta 2, chloroplastic	GO:0009507,GO:0009941,GO:0009570,GO:0005829,GO:0022626,GO:0005739,GO:0005730,GO:0005634,GO:0005524,GO:0051082,GO:0006458,GO:0007005,GO:0042026	chloroplast|chloroplast envelope|chloroplast stroma|cytosol|cytosolic ribosome|mitochondrion|nucleolus|nucleus|ATP binding|unfolded protein binding|'de novo' protein folding|mitochondrion organization|protein refolding	sot03018	RNA degradation
Soltu.DM.01G015110	416.959	432.511	401.407	0.928254	-0.107408	0.453736	0.630921	Down	7.2935	7.68116	6.57918	8.32158	6.94292	8.12188	102582682	PBL16	Probable serine/threonine-protein kinase PBL16
Soltu.DM.01G015150	60.9804	57.2391	64.7217	1.13067	0.177172	0.584267	0.738244	Up	6.08577	7.2202	7.57324	5.62846	7.05565	5.89087
Soltu.DM.01G015160	43.2759	45.9712	40.5805	0.880159	-0.184164	0.683911	0.811056	Down	1.30669	0.649275	0.66447	0.795223	1.4953	0.689656	102601727
Soltu.DM.01G015190	42915.8	47158	38673.6	0.820079	-0.286165	0.000291469	0.00159652	Down	367.19	382.834	333.733	441.203	472.305	416.096		ECT2	YTH domain-containing protein ECT2
Soltu.DM.01G015210	1252.89	1334.93	1170.85	0.877233	-0.188968	0.0557587	0.14121	Down	19.2008	18.7527	21.6877	23.542	22.0025	22.9025	102583345
Soltu.DM.01G015220	317.663	268.397	366.93	1.36658	0.450572	0.004154	0.0165083	Up	15.5515	16.7483	14.8285	10.9412	12.7653	10.9749	107062864
Soltu.DM.01G015230	1008.15	875.221	1141.08	1.30399	0.382932	0.000215542	0.00121625	Up	21.2375	23.4938	21.1748	16.9141	15.9765	18.0098	102583666	TBP	TATA-box-binding protein	GO:0005634,GO:0003677,GO:0006352	nucleus|DNA binding|DNA-templated transcription, initiation	sot03022	Basal transcription factors
Soltu.DM.01G015240	992.448	931.847	1053.05	1.12993	0.176239	0.0872771	0.200243	Up	15.1285	15.3987	15.5055	12.5468	14.3692	14.0821	102584009	DIN4	2-oxoisovalerate dehydrogenase subunit beta 2, mitochondrial	GO:0005947,GO:0005739,GO:0003863,GO:0003826,GO:0009083,GO:0043617,GO:0009646,GO:0007584,GO:0009744	mitochondrial alpha-ketoglutarate dehydrogenase complex|mitochondrion|3-methyl-2-oxobutanoate dehydrogenase (2-methylpropanoyl-transferring) activity|alpha-ketoacid dehydrogenase activity|branched-chain amino acid catabolic process|cellular response to sucrose starvation|response to absence of light|response to nutrient|response to sucrose	sot00280,sot00640	Valine, leucine and isoleucine degradation|Propanoate metabolism
Soltu.DM.01G015260	7.92207	4.07165	11.7725	2.90811	1.54008	0.132309	0.272306	Up	0.263982	0.570616	0.459648	0.150454	0	0.303052			Putative AC transposase	GO:0005634,GO:0003677,GO:0046983,GO:0006310,GO:0032196	nucleus|DNA binding|protein dimerization activity|DNA recombination|transposition
Soltu.DM.01G015310	14.8322	12.0621	17.6022	1.45865	0.544636	0.43428	0.614529	Up	0.917198	0.578255	0.465802	0.76234	0.358366	0.230332
Soltu.DM.01G015430	4113.94	4171.55	4056.33	0.972285	-0.0405488	0.659465	0.793769	Down	57.2964	60.1401	52.2133	55.1583	64.7995	55.5658	102596468		Pyruvate kinase, cytosolic isozyme	GO:0005737,GO:0005524,GO:0016301,GO:0000287,GO:0030955,GO:0004743	cytoplasm|ATP binding|kinase activity|magnesium ion binding|potassium ion binding|pyruvate kinase activity	sot00010,sot00620	Glycolysis / Gluconeogenesis|Pyruvate metabolism
Soltu.DM.01G015530	1.69355	2.35832	1.02878	0.431807	-1.21154	0.558706	0.717819	Down	0.0994697	0	0	0.0661403	0.0310917	0.133223
Soltu.DM.01G015840	9959.47	8976.75	10942.2	1.21897	0.285657	4.8e-05	0.000309925	Up	114.214	123.422	122.904	101.145	100.573	95.9397	102578980	SIRP1	E3 ubiquitin-protein ligase SIRP1	GO:0005737,GO:0046872,GO:0061630,GO:0006511	cytoplasm|metal ion binding|ubiquitin protein ligase activity|ubiquitin-dependent protein catabolic process
Soltu.DM.01G015850	151.209	138.277	164.142	1.18796	0.24849	0.305562	0.487647	Up	5.40758	4.61577	6.78196	5.91882	3.81958	4.51485	102578643
Soltu.DM.01G015870	65.3333	61.2757	69.3909	1.13258	0.179612	0.582051	0.736486	Up	8.26108	6.03236	6.863	7.71806	5.00098	6.09241	102578210	GGCT2;1	Gamma-glutamylcyclotransferase 2-1	GO:0005737,GO:0003839,GO:0006751,GO:0046686,GO:0010288	cytoplasm|gamma-glutamylcyclotransferase activity|glutathione catabolic process|response to cadmium ion|response to lead ion	sot00480	Glutathione metabolism
Soltu.DM.01G015880	619.123	581.83	656.417	1.12798	0.173738	0.15201	0.301541	Up	16.0067	14.9959	16.7139	13.1052	15.0333	14.4258	102606203	RHIP1	RGS1-HXK1-interacting protein 1	GO:0005739,GO:0071333,GO:0007275,GO:1902659	mitochondrion|cellular response to glucose stimulus|multicellular organism development|regulation of glucose mediated signaling pathway
Soltu.DM.01G015970	76.693	84.0374	69.3486	0.826192	-0.275451	0.400606	0.584916	Down	1.97898	2.46878	4.06617	3.69566	3.55354	3.12986	102605458	S2P	Membrane-bound transcription factor site-2 protease homolog	GO:0005737,GO:0000139,GO:0016021,GO:0046872,GO:0004222,GO:0071475,GO:0031293,GO:0006508,GO:1900457,GO:1905897,GO:0009651	cytoplasm|Golgi membrane|integral component of membrane|metal ion binding|metalloendopeptidase activity|cellular hyperosmotic salinity response|membrane protein intracellular domain proteolysis|proteolysis|regulation of brassinosteroid mediated signaling pathway|regulation of response to endoplasmic reticulum stress|response to salt stress	sot04141	Protein processing in endoplasmic reticulum
Soltu.DM.01G015980	452.497	437.896	467.098	1.06638	0.0927196	0.50387	0.675051	Up	4.17853	3.45959	3.60799	3.76406	3.45369	3.39272	102605458	S2P	Membrane-bound transcription factor site-2 protease homolog	GO:0005737,GO:0000139,GO:0016021,GO:0046872,GO:0004222,GO:0071475,GO:0031293,GO:0006508,GO:1900457,GO:1905897,GO:0009651	cytoplasm|Golgi membrane|integral component of membrane|metal ion binding|metalloendopeptidase activity|cellular hyperosmotic salinity response|membrane protein intracellular domain proteolysis|proteolysis|regulation of brassinosteroid mediated signaling pathway|regulation of response to endoplasmic reticulum stress|response to salt stress	sot04141	Protein processing in endoplasmic reticulum
Soltu.DM.01G015990	458.697	419.121	498.272	1.18802	0.248555	0.114756	0.245702	Up	44.6769	34.3732	30.9545	29.8329	33.3737	29.8934
Soltu.DM.01G016000	1445.98	1453.18	1438.77	0.990107	-0.0143437	0.881184	0.933811	Down	48.8757	43.7698	50.4295	47.7278	46.4077	51.357	102603557
Soltu.DM.01G016020	87.8255	98.6829	76.968	0.780248	-0.357996	0.288447	0.469134	Down	1.10223	2.35575	1.48813	2.24269	2.64599	1.48364	102579723	KIN14T	Kinesin-like protein KIN-14T	GO:0005871,GO:0005874,GO:0005739,GO:0005524,GO:0016887,GO:0008017,GO:0003777,GO:0007018	kinesin complex|microtubule|mitochondrion|ATP binding|ATPase activity|microtubule binding|microtubule motor activity|microtubule-based movement
Soltu.DM.01G016030	31.1747	28.668	33.6814	1.17402	0.231452	0.608805	0.756204	Up	0.54486	0.338991	0.52429	0.357526	0.41681	0.432089	102606138	KIN14B	Kinesin-like protein KIN-14B	GO:0005871,GO:0005874,GO:0005524,GO:0016887,GO:0008017,GO:0003777,GO:0007018	kinesin complex|microtubule|ATP binding|ATPase activity|microtubule binding|microtubule motor activity|microtubule-based movement
Soltu.DM.01G016040	55.6819	57.7575	53.6064	0.927539	-0.10852	0.765478	0.86463	Down	0.727518	0.605443	0.941301	0.609522	1.05061	0.803873	102603895	PCMP-E13	Pentatricopeptide repeat-containing protein At5g56310
Soltu.DM.01G016050	154.665	155.663	153.668	0.986618	-0.0194372	0.941318	0.967113	Down	1.87449	0.949951	1.19407	1.476	1.09334	1.53157	102604455	QKY	Protein QUIRKY	GO:0016021,GO:0005886,GO:0009506,GO:0099402	integral component of membrane|plasma membrane|plasmodesma|plant organ development
Soltu.DM.01G016150	1.61771	0.644985	2.59043	3.9774	1.99183	0.389623	0.574315	Up	0	0.412172	0.136212	0	0.136234	0
Soltu.DM.01G016190	51.0486	43.3634	58.7338	1.35534	0.438658	0.226717	0.396919	Up	2.7275	4.18429	3.46647	2.17631	2.55764	2.98331		PURA1	Transcription factor Pur-alpha 1	GO:0005737,GO:0005634,GO:0001227,GO:0003690,GO:0003729,GO:0032422,GO:0000977,GO:0043565,GO:0046686	cytoplasm|nucleus|DNA-binding transcription repressor activity, RNA polymerase II-specific|double-stranded DNA binding|mRNA binding|purine-rich negative regulatory element binding|RNA polymerase II regulatory region sequence-specific DNA binding|sequence-specific DNA binding|response to cadmium ion
Soltu.DM.01G016200	59.6043	70.4315	48.7772	0.69306	-0.528948	0.126175	0.263659	Down	0.37005	0.400986	0.325265	0.607453	0.368693	0.619526	102586266	CTPA3	Carboxyl-terminal-processing peptidase 3, chloroplastic	GO:0009543,GO:0016020,GO:0004175,GO:0008236	chloroplast thylakoid lumen|membrane|endopeptidase activity|serine-type peptidase activity
Soltu.DM.01G016210	10.2049	13.1197	7.29021	0.555529	-0.848065	0.290619	0.471386	Down	1.05733	0.888799	0.550734	1.64044	0.771152	2.12417
Soltu.DM.01G016280	16.9993	10.2999	23.6987	2.29823	1.20052	0.0587954	0.147164	Up	0.657351	0.976875	0.52827	0.187325	0.38159	0.37732	102605806	SYT5	Synaptotagmin-5	GO:0012505,GO:0005783,GO:0016021,GO:0005886,GO:0009506,GO:0008289,GO:0046872,GO:0006869	endomembrane system|endoplasmic reticulum|integral component of membrane|plasma membrane|plasmodesma|lipid binding|metal ion binding|lipid transport
Soltu.DM.01G016430	8.40059	8.13367	8.66751	1.06634	0.0926649	0.925817	0.958946	Up	0.296711	0.0601275	0.178835	0.274799	0.0198738	0.21289	107059642	fluG	Protein fluG	GO:0005737,GO:0016787,GO:0008134,GO:0001896,GO:0048315,GO:0006598,GO:0075307,GO:0010914,GO:1900376,GO:0010913,GO:0000905,GO:0030435,GO:0045461	cytoplasm|hydrolase activity|transcription factor binding|autolysis|conidium formation|polyamine catabolic process|positive regulation of conidium formation|positive regulation of sterigmatocystin biosynthetic process|regulation of secondary metabolite biosynthetic process|regulation of sterigmatocystin biosynthetic process|sporocarp development involved in asexual reproduction|sporulation result…
Soltu.DM.01G016440	1.69312	0	3.38624	18.3431	4.19716	0.0873361	0.200335	Up	0.766384	0	0.179635	0	0	0
Soltu.DM.01G016470	2.34285	1.36081	3.3249	2.45325	1.29469	0.48039	0.655259	Up	0.12871	0.0243438	0.0965399	0.102699	0	0	102592743	fluG	Protein fluG	GO:0005737,GO:0016787,GO:0008134,GO:0001896,GO:0048315,GO:0006598,GO:0075307,GO:0010914,GO:1900376,GO:0010913,GO:0000905,GO:0030435,GO:0045461	cytoplasm|hydrolase activity|transcription factor binding|autolysis|conidium formation|polyamine catabolic process|positive regulation of conidium formation|positive regulation of sterigmatocystin biosynthetic process|regulation of secondary metabolite biosynthetic process|regulation of sterigmatocystin biosynthetic process|sporocarp development involved in asexual reproduction|sporulation result…
Soltu.DM.01G016490	259.225	270.404	248.045	0.916925	-0.125125	0.525624	0.692632	Down	10.397	12.3321	9.12842	11.8639	13.7568	9.29326	102589348		Glycosyltransferase-like At3g57200	GO:0005737,GO:0005576,GO:0009505,GO:0005886,GO:0016757,GO:0007049,GO:0030154,GO:0051301,GO:0071555,GO:0007275,GO:0040008	cytoplasm|extracellular region|plant-type cell wall|plasma membrane|transferase activity, transferring glycosyl groups|cell cycle|cell differentiation|cell division|cell wall organization|multicellular organism development|regulation of growth
Soltu.DM.01G016590	132.884	159.223	106.546	0.6699	-0.577982	0.0345531	0.0963093	Down	7.13695	11.0758	10.2087	19.256	12.3554	11.1213
Soltu.DM.01G016600	1415.34	1547.57	1283.1	0.82903	-0.270504	0.00306925	0.012694	Down	31.7814	29.713	28.7793	36.8493	35.1653	37.5968	102589727	PURA1	Transcription factor Pur-alpha 1	GO:0005737,GO:0005634,GO:0001227,GO:0003690,GO:0003729,GO:0032422,GO:0000977,GO:0043565,GO:0046686	cytoplasm|nucleus|DNA-binding transcription repressor activity, RNA polymerase II-specific|double-stranded DNA binding|mRNA binding|purine-rich negative regulatory element binding|RNA polymerase II regulatory region sequence-specific DNA binding|sequence-specific DNA binding|response to cadmium ion
Soltu.DM.01G016620	511.24	522.608	499.871	0.956356	-0.0643799	0.619784	0.764502	Down	35.12	31.9176	32.735	37.8962	34.4736	32.5961	102589727	PURA1	Transcription factor Pur-alpha 1	GO:0005737,GO:0005634,GO:0001227,GO:0003690,GO:0003729,GO:0032422,GO:0000977,GO:0043565,GO:0046686	cytoplasm|nucleus|DNA-binding transcription repressor activity, RNA polymerase II-specific|double-stranded DNA binding|mRNA binding|purine-rich negative regulatory element binding|RNA polymerase II regulatory region sequence-specific DNA binding|sequence-specific DNA binding|response to cadmium ion
Soltu.DM.01G016630	252.087	224.292	279.881	1.24765	0.319208	0.0780982	0.18369	Up	7.9526	6.9697	8.84906	6.8278	6.80176	5.53044	102593743
Soltu.DM.01G016690	36.6815	43.1216	30.2414	0.701067	-0.512375	0.302958	0.484587	Down	1.68637	1.06318	0.790548	2.24263	0.753023	2.09728		CPX	Oxygen-dependent coproporphyrinogen-III oxidase, chloroplastic	GO:0009507,GO:0004109,GO:0042803,GO:0015995,GO:0006782	chloroplast|coproporphyrinogen oxidase activity|protein homodimerization activity|chlorophyll biosynthetic process|protoporphyrinogen IX biosynthetic process
Soltu.DM.01G016730	18.4021	16.4071	20.397	1.2445	0.315562	0.595347	0.746255	Up	1.64366	1.55439	1.9466	2.07079	1.1357	0.955878	102595391	CPX	Oxygen-dependent coproporphyrinogen-III oxidase, chloroplastic	GO:0009507,GO:0004109,GO:0042803,GO:0015995,GO:0006782	chloroplast|coproporphyrinogen oxidase activity|protein homodimerization activity|chlorophyll biosynthetic process|protoporphyrinogen IX biosynthetic process	sot00860	Porphyrin metabolism
Soltu.DM.01G016750	16.8358	20.8981	12.7734	0.613043	-0.705941	0.283156	0.463731	Down	0.604542	0.889322	1.00765	1.8089	0.566894	1.75432	102587469	RPL23C	60S ribosomal protein L23	GO:0022625,GO:0005730,GO:0070180,GO:0003735,GO:0006412	cytosolic large ribosomal subunit|nucleolus|large ribosomal subunit rRNA binding|structural constituent of ribosome|translation	sot03010	Ribosome
Soltu.DM.01G016770	2.31434	2.35967	2.26901	0.966758	-0.0487738	0.977404	0.988104	Down	0	0.288741	0.0477107	0.152264	0.0477183	0.153349			Probable serine/threonine-protein kinase At1g54610	GO:0005634,GO:0005886,GO:0005524,GO:0004693,GO:0006468	nucleus|plasma membrane|ATP binding|cyclin-dependent protein serine/threonine kinase activity|protein phosphorylation
Soltu.DM.01G016780	550.422	576.766	524.078	0.908948	-0.13773	0.284478	0.465032	Down	4.9231	5.52439	5.32217	6.4235	5.48755	5.55695
Soltu.DM.01G016790	32.5552	36.4212	28.6892	0.789873	-0.340308	0.552481	0.713305	Down	0.645148	2.33875	1.51219	2.14489	0.7058	2.91624	102584053					sot03013	Nucleocytoplasmic transport
Soltu.DM.01G016800	85.7708	84.7794	86.7621	1.02314	0.0329972	0.907028	0.948897	Up	7.69549	5.63421	7.60301	6.18987	6.5955	7.81326
Soltu.DM.01G016900	196.391	189.117	203.665	1.07723	0.107322	0.640795	0.779852	Up	4.38741	7.76557	5.44764	4.70121	6.06008	5.68762	102577910	DET1	Light-mediated development protein DET1	GO:0005634,GO:0003824,GO:0009585	nucleus|catalytic activity|red, far-red light phototransduction	sot04120	Ubiquitin mediated proteolysis
Soltu.DM.01G016910	255.097	253.478	256.715	1.01217	0.0174576	0.933867	0.963222	Up	9.69054	8.45655	9.85735	9.62796	11.6132	6.53956	102577910	DET1	Light-mediated development protein DET1	GO:0005634,GO:0003824,GO:0009585	nucleus|catalytic activity|red, far-red light phototransduction	sot04120	Ubiquitin mediated proteolysis
Soltu.DM.01G016940	19.6747	25.556	13.7934	0.540832	-0.886747	0.137688	0.280686	Down	0.851018	1.31694	0.942965	2.77789	1.08821	1.94284
Soltu.DM.01G016950	2768.06	2870.42	2665.7	0.928611	-0.106854	0.203612	0.369188	Down	17.8002	17.3865	18.2889	17.7744	20.3565	19.8225	102597577	UVR8	Ultraviolet-B receptor UVR8	GO:0000785,GO:0005829,GO:0005634,GO:0003682,GO:0005085,GO:0042802,GO:0009881,GO:0042803,GO:0009649,GO:0018298,GO:0009411,GO:0010224	chromatin|cytosol|nucleus|chromatin binding|guanyl-nucleotide exchange factor activity|identical protein binding|photoreceptor activity|protein homodimerization activity|entrainment of circadian clock|protein-chromophore linkage|response to UV|response to UV-B
Soltu.DM.01G017020	2.83	3.7124	1.94759	0.526993	-0.924144	0.606695	0.754758	Down	0	0.274084	0	0.0481783	0.0452961	0.436695	102603972
Soltu.DM.01G017030	145.872	163.741	128.003	0.781421	-0.355829	0.122744	0.258609	Down	6.49027	4.53661	6.52606	6.75481	7.62966	8.22023	102590508	DRB1	Double-stranded RNA-binding protein 1	GO:0003723	RNA binding
Soltu.DM.01G017040	190.776	196.705	184.847	0.939847	-0.0895023	0.685466	0.81204	Down	5.14581	4.99031	7.52881	5.36124	7.09973	6.453	102590508	DBR4	Double-stranded RNA-binding protein 4	GO:0005634,GO:0003725,GO:0051607,GO:0035196,GO:0070919,GO:0010267,GO:0060145,GO:0016032	nucleus|double-stranded RNA binding|defense response to virus|production of miRNAs involved in gene silencing by miRNA|production of siRNA involved in chromatin silencing by small RNA|production of ta-siRNAs involved in RNA interference|viral gene silencing in virus induced gene silencing|viral process
Soltu.DM.01G017170	70.1775	57.3129	83.042	1.44937	0.535422	0.0900209	0.204919	Up	0.708744	0.808242	1.00652	0.467799	0.615739	0.670057	102589647	URA7	CTP synthase	GO:0097268,GO:0005524,GO:0003883,GO:0044210,GO:0006541,GO:0019856	cytoophidium|ATP binding|CTP synthase activity|'de novo' CTP biosynthetic process|glutamine metabolic process|pyrimidine nucleobase biosynthetic process	sot00240	Pyrimidine metabolism
Soltu.DM.01G017190	237.923	242.671	233.175	0.960727	-0.0578014	0.750749	0.855548	Down	19.8631	16.426	22.1704	19.3825	21.287	20.5571	102589318	SYP132	Syntaxin-132	GO:0012505,GO:0016021,GO:0005886,GO:0031201,GO:0005484,GO:0000149,GO:0006887,GO:0006886,GO:0048278,GO:0006906	endomembrane system|integral component of membrane|plasma membrane|SNARE complex|SNAP receptor activity|SNARE binding|exocytosis|intracellular protein transport|vesicle docking|vesicle fusion	sot04130	SNARE interactions in vesicular transport
Soltu.DM.01G017210	821.55	886.097	757.003	0.854005	-0.227683	0.0519606	0.133425	Down	13.826	12.0521	11.4257	15.2903	14.9779	13.6675	102589318	SYP132	Syntaxin-132	GO:0012505,GO:0016021,GO:0005886,GO:0031201,GO:0005484,GO:0000149,GO:0006887,GO:0006886,GO:0048278,GO:0006906	endomembrane system|integral component of membrane|plasma membrane|SNARE complex|SNAP receptor activity|SNARE binding|exocytosis|intracellular protein transport|vesicle docking|vesicle fusion	sot04130	SNARE interactions in vesicular transport
Soltu.DM.01G017220	23.9457	17.7014	30.1901	1.70697	0.771434	0.157678	0.309328	Up	1.40576	0.971493	2.38255	0.808903	0.861912	1.14054	102588778		Probable glycosyltransferase At5g03795	GO:0000139,GO:0016021,GO:0016757,GO:0071555,GO:0006486	Golgi membrane|integral component of membrane|transferase activity, transferring glycosyl groups|cell wall organization|protein glycosylation
Soltu.DM.01G017230	26.0322	23.7257	28.3388	1.19475	0.256707	0.601778	0.751029	Up	0.898899	0.674199	0.988093	0.618315	0.639456	0.902946	102588778		Probable glycosyltransferase At3g07620	GO:0000139,GO:0016021,GO:0016757,GO:0071555,GO:0006486	Golgi membrane|integral component of membrane|transferase activity, transferring glycosyl groups|cell wall organization|protein glycosylation
Soltu.DM.01G017240	739.389	753.145	725.632	0.963631	-0.053447	0.675222	0.804576	Down	21.5526	20.5608	24.55	26.2106	22.456	20.9533	102588229	RPL34	50S ribosomal protein L34, chloroplastic	GO:0009507,GO:0005762,GO:0019843,GO:0003735,GO:0006412	chloroplast|mitochondrial large ribosomal subunit|rRNA binding|structural constituent of ribosome|translation	sot03010	Ribosome
Soltu.DM.01G017250	87.4327	87.6456	87.2197	0.995046	-0.00716537	0.979909	0.989111	Down	4.50513	3.52138	3.66358	3.71392	3.2762	4.84865	102587480
Soltu.DM.01G017260	105.034	127.831	82.2359	0.64248	-0.638277	0.0200101	0.0617409	Down	1.92891	1.70253	1.50708	2.43691	3.41659	2.17441	102587480		Uncharacterized protein C683.02c	GO:0005730,GO:0003676,GO:0008270	nucleolus|nucleic acid binding|zinc ion binding
Soltu.DM.01G017290	809.431	756.693	862.169	1.13935	0.18821	0.0806754	0.188477	Up	33.6414	31.6275	33.9846	30.6	29.1397	27.9227	102586805	SIP2-1	Probable aquaporin SIP2-1	GO:0005789,GO:0016021,GO:0015267	endoplasmic reticulum membrane|integral component of membrane|channel activity
Soltu.DM.01G017400	27.2458	28.2294	26.2622	0.930164	-0.104442	0.853232	0.917809	Down	0.651388	0.455311	1.06213	1.01691	1.00919	0.312936	102586258
Soltu.DM.01G017420	11243.9	15814	6673.78	0.421997	-1.24469	4.76e-42	4.98e-40	Down	228.543	203.058	195.335	552.949	493.311	448.464	102578245		Universal stress protein A-like protein	GO:0005886,GO:0016208	plasma membrane|AMP binding
Soltu.DM.01G017530	1236.5	1379.68	1093.31	0.792313	-0.335857	0.000869128	0.00422698	Down	12.0718	12.7757	11.5214	15.0561	16.5413	14.5789	102578572		Probable protein phosphatase 2C 31	GO:0005524,GO:0046872,GO:0004721,GO:0004674	ATP binding|metal ion binding|phosphoprotein phosphatase activity|protein serine/threonine kinase activity
Soltu.DM.01G017560	185.303	189.44	181.166	0.957079	-0.0632898	0.774458	0.870803	Down	5.42781	7.44482	9.01254	6.94271	7.73182	8.36566		TGD4	Protein TRIGALACTOSYLDIACYLGLYCEROL 4, chloroplastic	GO:0009507,GO:0009941,GO:0009707,GO:0005783,GO:0016021,GO:0016020,GO:0005739,GO:0009536,GO:0005774,GO:0070300,GO:0042803,GO:0034196,GO:1990052	chloroplast|chloroplast envelope|chloroplast outer membrane|endoplasmic reticulum|integral component of membrane|membrane|mitochondrion|plastid|vacuolar membrane|phosphatidic acid binding|protein homodimerization activity|acylglycerol transport|ER to chloroplast lipid transport
Soltu.DM.01G017570	193.751	192.003	195.499	1.01852	0.0264802	0.889661	0.93894	Up	4.74051	5.32515	4.86202	4.59754	4.61721	5.55111	102579565	TGD4	Protein TRIGALACTOSYLDIACYLGLYCEROL 4, chloroplastic	GO:0009507,GO:0009941,GO:0009707,GO:0005783,GO:0016021,GO:0016020,GO:0005739,GO:0009536,GO:0005774,GO:0070300,GO:0042803,GO:0034196,GO:1990052	chloroplast|chloroplast envelope|chloroplast outer membrane|endoplasmic reticulum|integral component of membrane|membrane|mitochondrion|plastid|vacuolar membrane|phosphatidic acid binding|protein homodimerization activity|acylglycerol transport|ER to chloroplast lipid transport
Soltu.DM.01G017590	6.05956	8.55248	3.56664	0.418084	-1.25814	0.256047	0.431646	Down	0.0230969	0.0655274	0.151586	0.0691102	0.346537	0.162406	107062340	GLK2	Transcription activator GLK2	GO:0005634,GO:0003700,GO:0044212,GO:0009658,GO:0009910,GO:1900056,GO:0045893,GO:0010380	nucleus|DNA-binding transcription factor activity|transcription regulatory region DNA binding|chloroplast organization|negative regulation of flower development|negative regulation of leaf senescence|positive regulation of transcription, DNA-templated|regulation of chlorophyll biosynthetic process
Soltu.DM.01G017610	86.4982	76.5776	96.4189	1.25872	0.331963	0.239124	0.41172	Up	6.66115	6.23014	7.68656	4.38052	6.0404	6.02938	102579893	ERF020	Ethylene-responsive transcription factor ERF020	GO:0005634,GO:0003677,GO:0003700,GO:0009873,GO:0010200	nucleus|DNA binding|DNA-binding transcription factor activity|ethylene-activated signaling pathway|response to chitin
Soltu.DM.01G017620	201.704	229.825	173.582	0.754525	-0.40636	0.043185	0.115168	Down	17.0108	12.3439	13.2644	16.7985	20.5315	19.4559	102598415
Soltu.DM.01G017630	516.782	594.985	438.579	0.736823	-0.440609	0.00371889	0.0149866	Down	7.56949	8.05513	5.64637	9.47454	10.4677	9.09086	102598415
Soltu.DM.01G017660	1321.25	1417	1225.5	0.864658	-0.209798	0.042205	0.113104	Down	28.7835	29.4941	25.9479	30.1428	35.4133	32.4414		RPL3B	50S ribosomal protein L3-2, mitochondrial	GO:0009507,GO:0005739,GO:0005840,GO:0019843,GO:0003735,GO:0006412	chloroplast|mitochondrion|ribosome|rRNA binding|structural constituent of ribosome|translation
Soltu.DM.01G017670	483.286	522.217	444.356	0.85091	-0.232922	0.0843071	0.194841	Down	44.9363	50.9948	41.0407	53.1503	53.1434	55.7595	102580539	RPL3B	50S ribosomal protein L3-2, mitochondrial	GO:0009507,GO:0005739,GO:0005840,GO:0019843,GO:0003735,GO:0006412	chloroplast|mitochondrion|ribosome|rRNA binding|structural constituent of ribosome|translation	sot03010	Ribosome
Soltu.DM.01G017690	877.35	968.156	786.544	0.812297	-0.299921	0.00423124	0.0167694	Down	13.9543	13.9391	13.9908	16.9966	18.292	16.5857	102580217	PDK	[Pyruvate dehydrogenase (acetyl-transferring)] kinase, mitochondrial	GO:0005739,GO:0005524,GO:0009927,GO:0042803,GO:0004740,GO:0046777	mitochondrion|ATP binding|histidine phosphotransfer kinase activity|protein homodimerization activity|pyruvate dehydrogenase (acetyl-transferring) kinase activity|protein autophosphorylation
Soltu.DM.01G017830	3.62954	4.32331	2.93577	0.679981	-0.556433	0.721785	0.836284	Down	0.148686	0	0.487916	0	0.348567	0.597424		H3C4	Histone H3.2	GO:0010369,GO:0000786,GO:0005634,GO:0003677,GO:0046982	chromocenter|nucleosome|nucleus|DNA binding|protein heterodimerization activity
Soltu.DM.01G017840	4.57832	5.24708	3.90957	0.744661	-0.425345	0.729653	0.841097	Down	0.10052	0.142591	0.329859	0.200517	0.518433	0.0504865
Soltu.DM.01G017860	284.795	291.106	278.483	0.956218	-0.0645882	0.690804	0.815795	Down	4.26828	4.02263	3.57698	3.8781	4.2492	4.36092	102581788	EMB2750	Pentatricopeptide repeat-containing protein At3g06430, chloroplastic
Soltu.DM.01G017940	1.65915	2.65078	0.667525	0.250314	-1.99819	0.351851	0.537177	Down	0.00893515	0.00844985	0	0.0356474	0.0335148	0	102582112	CAMTA3	Calmodulin-binding transcription activator 3	GO:0005634,GO:0005516,GO:0003700,GO:0001077,GO:0043565,GO:0070417,GO:0042742,GO:0050832,GO:0010150,GO:1900367,GO:0045944,GO:0006355,GO:0009409	nucleus|calmodulin binding|DNA-binding transcription factor activity|proximal promoter DNA-binding transcription activator activity, RNA polymerase II-specific|sequence-specific DNA binding|cellular response to cold|defense response to bacterium|defense response to fungus|leaf senescence|positive regulation of defense response to insect|positive regulation of transcription by RNA polymerase II|re…
Soltu.DM.01G017960	2.29831	3.22492	1.3717	0.420789	-1.24883	0.576599	0.732492	Down	0.342916	0	0	0	0.803903	0
Soltu.DM.01G017980	504.136	566.549	441.724	0.779392	-0.35958	0.00863294	0.0308827	Down	1.82713	1.86471	1.63168	2.02439	2.48861	2.35855	102583007	KIN12C	Kinesin-like protein KIN-12C	GO:0005871,GO:0005874,GO:0009524,GO:0005524,GO:0016887,GO:0008017,GO:0003777,GO:0000911,GO:0007018,GO:0000281	kinesin complex|microtubule|phragmoplast|ATP binding|ATPase activity|microtubule binding|microtubule motor activity|cytokinesis by cell plate formation|microtubule-based movement|mitotic cytokinesis
Soltu.DM.01G018090	1466.17	912.452	2019.89	2.21414	1.14675	3.09e-28	1.73e-26	Up	14.8003	17.7669	18.2537	7.91884	7.52602	7.6632	102583995		Importin beta-like SAD2 homolog	GO:0005829,GO:0005635,GO:0008565,GO:0008536,GO:0006606	cytosol|nuclear envelope|protein transporter activity|Ran GTPase binding|protein import into nucleus
Soltu.DM.01G018210	81880.1	83185.6	80574.6	0.96861	-0.0460118	0.479515	0.654455	Down	1877.83	1860.95	1767.17	1829.24	1897.57	1995.62	102577686	ARF	ADP-ribosylation factor	GO:0005794,GO:0005525,GO:0015031,GO:0016192	Golgi apparatus|GTP binding|protein transport|vesicle-mediated transport	sot04144	Endocytosis
Soltu.DM.01G018220	125.039	146.889	103.189	0.702767	-0.508882	0.10111	0.223243	Down	2.55428	2.91286	2.06612	5.61975	2.63003	2.54062	102582779	SAMC2	Probable S-adenosylmethionine carrier 2, chloroplastic	GO:0009941,GO:0031969,GO:0016021,GO:0005743,GO:0000095	chloroplast envelope|chloroplast membrane|integral component of membrane|mitochondrial inner membrane|S-adenosyl-L-methionine transmembrane transporter activity
Soltu.DM.01G018330	4265.87	4404	4127.74	0.937255	-0.0934865	0.215502	0.383624	Down	26.2037	26.162	27.5502	28.8443	29.6095	27.3422	102584978	RH40	DEAD-box ATP-dependent RNA helicase 40	GO:0005634,GO:0005773,GO:0005524,GO:0004386,GO:0003723,GO:0000184,GO:0006364	nucleus|vacuole|ATP binding|helicase activity|RNA binding|nuclear-transcribed mRNA catabolic process, nonsense-mediated decay|rRNA processing	sot03040	Spliceosome
Soltu.DM.01G018340	5747.44	4786.74	6708.14	1.40151	0.486983	1.07e-06	9.33e-06	Up	58.396	63.4746	78.3962	49.471	45.7432	48.6407	102585305	BOR1	Boron transporter 1	GO:0005768,GO:0005887,GO:0005773,GO:0015301,GO:0080139,GO:0005452,GO:0046713,GO:0051453,GO:0010036	endosome|integral component of plasma membrane|vacuole|anion:anion antiporter activity|borate efflux transmembrane transporter activity|inorganic anion exchanger activity|borate transport|regulation of intracellular pH|response to boron-containing substance
Soltu.DM.01G018350	68.054	79.8109	56.2971	0.705581	-0.503117	0.104775	0.229246	Down	1.58768	1.96344	1.45995	2.6494	2.26185	2.2389	102585853
Soltu.DM.01G018380	2018.35	2297.36	1739.34	0.757115	-0.401416	1.7e-06	1.44e-05	Down	15.8578	16.1377	15.8137	22.239	20.9881	20.3234	102587958	VAR3	Zinc finger protein VAR3, chloroplastic	GO:0009507,GO:0009570,GO:0046872,GO:1900871,GO:0009658,GO:0006397	chloroplast|chloroplast stroma|metal ion binding|chloroplast mRNA modification|chloroplast organization|mRNA processing
Soltu.DM.01G018420	1505.3	1497.3	1513.29	1.0107	0.0153519	0.889637	0.93894	Up	26.7213	23.18	30.6872	27.7265	27.0783	25.4289	102588822	RPS1	30S ribosomal protein S1, chloroplastic	GO:0009507,GO:0005840,GO:0003723	chloroplast|ribosome|RNA binding	sot03010	Ribosome
Soltu.DM.01G018440	946.643	970.513	922.772	0.950873	-0.0726751	0.498065	0.670139	Down	10.7506	12.5833	11.3863	12.1385	12.6952	11.9139		mtr1	Ribosome quality control complex subunit 2	GO:0005829,GO:1990112,GO:0043023,GO:0000049,GO:0072344,GO:1990116	cytosol|RQC complex|ribosomal large subunit binding|tRNA binding|rescue of stalled ribosome|ribosome-associated ubiquitin-dependent protein catabolic process
Soltu.DM.01G018470	590.285	626.775	553.795	0.883693	-0.178382	0.147072	0.294344	Down	8.0024	8.80114	9.19363	9.98897	10.252	9.36469	102589147	mtr1	Ribosome quality control complex subunit 2	GO:0005829,GO:1990112,GO:0043023,GO:0000049,GO:0072344,GO:1990116	cytosol|RQC complex|ribosomal large subunit binding|tRNA binding|rescue of stalled ribosome|ribosome-associated ubiquitin-dependent protein catabolic process
Soltu.DM.01G018500	16.1243	9.39226	22.8564	2.43539	1.28415	0.0495423	0.128553	Up	2.57851	2.09011	1.4678	1.2859	0.604483	0.64753
Soltu.DM.01G018520	1463.07	1471.87	1454.27	0.988078	-0.0173037	0.844894	0.912975	Down	26.2456	24.9942	26.852	26.5078	25.7855	27.2703		UPL6	E3 ubiquitin-protein ligase UPL6	GO:0061631,GO:0000209,GO:0006511	ubiquitin conjugating enzyme activity|protein polyubiquitination|ubiquitin-dependent protein catabolic process
Soltu.DM.01G018530	1244.31	1248.15	1240.48	0.993977	-0.00871632	0.927711	0.959906	Down	16.9675	16.3535	17.8173	18.2771	16.4014	17.1149		UPL6	E3 ubiquitin-protein ligase UPL6	GO:0061631,GO:0000209,GO:0006511	ubiquitin conjugating enzyme activity|protein polyubiquitination|ubiquitin-dependent protein catabolic process
Soltu.DM.01G018540	11.2142	14.1333	8.29506	0.586693	-0.769322	0.384238	0.568721	Down	0.17013	0.225245	0.0159509	0.407248	0.127628	0.170896	107059660		Putative ribonuclease H protein At1g65750	GO:0046872,GO:0003676,GO:0004523	metal ion binding|nucleic acid binding|RNA-DNA hybrid ribonuclease activity
Soltu.DM.01G018550	378.885	365.185	392.585	1.07464	0.103858	0.490724	0.664502	Up	13.8017	13.8421	13.9277	12.9326	14.6111	11.3465	102590690	UPL6	E3 ubiquitin-protein ligase UPL6	GO:0061631,GO:0000209,GO:0006511	ubiquitin conjugating enzyme activity|protein polyubiquitination|ubiquitin-dependent protein catabolic process	sot04120	Ubiquitin mediated proteolysis
Soltu.DM.01G018600	66.5475	89.5265	43.5684	0.486173	-1.04046	0.00129147	0.0059907	Down	0.986578	0.813888	0.865949	1.94708	2.10617	1.4549	102591265	MYB78	Transcription factor MYB78	GO:0005634,GO:0003700,GO:0043565,GO:0009737,GO:1902074,GO:0009651	nucleus|DNA-binding transcription factor activity|sequence-specific DNA binding|response to abscisic acid|response to salt|response to salt stress
Soltu.DM.01G018650	5.87471	4.73839	7.01104	1.48094	0.56651	0.625128	0.768285	Up	0.615033	0.0484691	0.384426	0.408954	0.048061	0.257418		RPL37A	60S ribosomal protein L37a	GO:0005840,GO:0046872,GO:0003735,GO:0006412	ribosome|metal ion binding|structural constituent of ribosome|translation
Soltu.DM.01G018690	3325.65	2292.36	4358.93	1.90146	0.927106	2.25e-36	1.87e-34	Up	48.7963	47.0275	46.8979	25.5723	24.8744	25.1002	102591938	INVC	Alkaline/neutral invertase C, mitochondrial	GO:0005739,GO:0033926,GO:0004575,GO:0007623,GO:0010029,GO:0048510,GO:0005987	mitochondrion|glycopeptide alpha-N-acetylgalactosaminidase activity|sucrose alpha-glucosidase activity|circadian rhythm|regulation of seed germination|regulation of timing of transition from vegetative to reproductive phase|sucrose catabolic process
Soltu.DM.01G018710	169.552	160.124	178.98	1.11816	0.161125	0.479906	0.654772	Up	11.6503	17.6618	17.0934	11.7087	15.5116	14.5615
Soltu.DM.01G018720	53.5598	54.9925	52.1272	0.948575	-0.076167	0.835652	0.907161	Down	1.21543	1.23352	2.05676	1.74448	1.69571	1.34002	102595262
Soltu.DM.01G018730	78.822	73.3359	84.3082	1.14943	0.200918	0.495002	0.667438	Up	10.2772	10.6789	10.2304	10.6301	9.63719	7.00977
Soltu.DM.01G018740	3558.7	3965.67	3151.73	0.794791	-0.331353	6.34e-06	4.85e-05	Down	38.3623	40.9195	40.0086	49.618	50.1922	51.2757	102593280	SFR2	Beta-glucosidase-like SFR2, chloroplastic	GO:0009707,GO:0102996,GO:0046480,GO:0004553,GO:0005975	chloroplast outer membrane|beta,beta digalactosyldiacylglycerol galactosyltransferase activity|galactolipid galactosyltransferase activity|hydrolase activity, hydrolyzing O-glycosyl compounds|carbohydrate metabolic process	sot00561	Glycerolipid metabolism
Soltu.DM.01G018750	1076.65	1237.29	916.015	0.740217	-0.433979	3.88e-05	0.000255708	Down	9.04428	7.87496	8.61414	12.2533	11.6457	10.804	102593605	AGDP1	Protein AGENET DOMAIN (AGD)-CONTAINING P1
Soltu.DM.01G018760	2056.48	2284.25	1828.71	0.800496	-0.321034	0.000101899	0.000614457	Down	48.2117	45.4458	44.8368	59.4858	57.5347	57.0917	102594367
Soltu.DM.01G018770	551.962	531.561	572.364	1.07648	0.106316	0.435267	0.615396	Up	6.55566	6.16906	5.23808	6.08764	5.55184	5.14703	102594699		Pentatricopeptide repeat-containing protein At3g48810
Soltu.DM.01G018780	2102.66	2064.12	2141.19	1.03733	0.0528802	0.511711	0.680967	Up	56.9577	59.394	55.833	55.9839	55.5057	55.5794	102595034
Soltu.DM.01G018790	213.255	176.221	250.289	1.42089	0.506795	0.0160655	0.0515747	Up	2.94765	2.63481	4.24011	2.33587	2.25923	2.36603	102595580	RWA2	Protein REDUCED WALL ACETYLATION 2	GO:0005783,GO:0005789,GO:0005794,GO:0000139,GO:0016021,GO:0016407,GO:0016491,GO:0005975,GO:0050832,GO:0009834,GO:0005976,GO:0009737,GO:1990937,GO:0045492,GO:0045491,GO:0010411	endoplasmic reticulum|endoplasmic reticulum membrane|Golgi apparatus|Golgi membrane|integral component of membrane|acetyltransferase activity|oxidoreductase activity|carbohydrate metabolic process|defense response to fungus|plant-type secondary cell wall biogenesis|polysaccharide metabolic process|response to abscisic acid|xylan acetylation|xylan biosynthetic process|xylan metabolic process|xylog…
Soltu.DM.01G018800	5968.51	5254.08	6682.94	1.27204	0.347148	1.22e-05	8.89e-05	Up	61.8654	68.0247	67.4222	50.4925	49.0672	56.6508	102595923	PAPS3	Nuclear poly(A) polymerase 3	GO:0005737,GO:0005634,GO:0005524,GO:0046872,GO:0004652,GO:0003723,GO:0006378	cytoplasm|nucleus|ATP binding|metal ion binding|polynucleotide adenylyltransferase activity|RNA binding|mRNA polyadenylation	sot03015	mRNA surveillance pathway
Soltu.DM.01G018850	3.14962	2.25745	4.0418	1.77517	0.82796	0.646807	0.784578	Up	0.217507	0.102847	0	0	0.178466	0	102596258	LE	Gibberellin 3-beta-dioxygenase 1			sot00904	Diterpenoid biosynthesis
Soltu.DM.01G018870	3.90407	4.56533	3.24281	0.710168	-0.493768	0.743153	0.850267	Down	0	0.46547	0.0512753	0.0545467	0.564118	0.109871	102603436	CPRD49	GDSL esterase/lipase CPRD49	GO:0048046,GO:0016788,GO:0016042	apoplast|hydrolase activity, acting on ester bonds|lipid catabolic process
Soltu.DM.01G018890	2.81341	1.68061	3.94622	2.35441	1.23536	0.409678	0.592835	Up	0.264331	0.0624937	0.433703	0.131821	0.0619675	0.132761
Soltu.DM.01G018980	1253.59	1311.85	1195.33	0.911299	-0.134003	0.206232	0.372223	Down	19.8964	18.1828	20.239	23.7835	19.2537	21.398	102597124
Soltu.DM.01G019000	1320.79	1550.14	1091.44	0.70388	-0.5066	1.22e-06	1.05e-05	Down	19.3729	16.8771	15.423	24.2461	24.3793	25.2508	102597452	GAL1	Galactokinase	GO:0005737,GO:0005829,GO:0005524,GO:0004335,GO:0005534,GO:0046872,GO:0046835,GO:0033499,GO:0006012	cytoplasm|cytosol|ATP binding|galactokinase activity|galactose binding|metal ion binding|carbohydrate phosphorylation|galactose catabolic process via UDP-galactose|galactose metabolic process	sot00520	Amino sugar and nucleotide sugar metabolism
Soltu.DM.01G019010	22.5931	36.8736	8.31262	0.22474	-2.15367	0.000380006	0.00202399	Down	1.04763	0.495363	0.572966	4.7891	2.3741	2.28008	102580981	HIPP24	Heavy metal-associated isoprenylated plant protein 24	GO:0046872,GO:0030001	metal ion binding|metal ion transport
Soltu.DM.01G019020	1728.13	1743.99	1712.28	0.981866	-0.0264017	0.775651	0.871733	Down	15.2955	17.4083	14.9583	16.5508	16.1694	16.1412	102581555	FCA	Flowering time control protein FCA	GO:0005737,GO:0005634,GO:1990904,GO:0003729,GO:0003723,GO:0030154,GO:0009908	cytoplasm|nucleus|ribonucleoprotein complex|mRNA binding|RNA binding|cell differentiation|flower development
Soltu.DM.01G019070	15.4249	11.8732	18.9767	1.60429	0.681938	0.389173	0.573994	Up	0.387966	0.733788	0.666869	0.709416	0.0303171	0.389712	102604863		Putative AC transposase	GO:0005634,GO:0003677,GO:0046983,GO:0006310,GO:0032196	nucleus|DNA binding|protein dimerization activity|DNA recombination|transposition
Soltu.DM.01G019100	16.8604	19.2009	14.5198	0.756941	-0.401748	0.586461	0.74022	Down	0.388405	0.629674	0.156068	1.02382	0.260155	0.278682	102582765	PER40	Peroxidase 40	GO:0005576,GO:0020037,GO:0046872,GO:0004601,GO:0042744,GO:0006979	extracellular region|heme binding|metal ion binding|peroxidase activity|hydrogen peroxide catabolic process|response to oxidative stress	sot00940	Phenylpropanoid biosynthesis
Soltu.DM.01G019110	67.1359	62.7848	71.4869	1.1388	0.187516	0.550175	0.711146	Up	3.82136	4.62355	3.26668	3.2509	3.2145	3.89501	102593686
Soltu.DM.01G019120	8.12374	9.00028	7.24719	0.805039	-0.312869	0.713075	0.830323	Down	0.500839	0.541299	0.469573	0.784981	0.670927	0.431223
Soltu.DM.01G019130	4.32206	4.06627	4.57786	1.12913	0.175209	0.912152	0.951065	Up	0.169927	0.883839	0.0796598	0	0	1.02415	102595364
Soltu.DM.01G019140	1.94463	3.22492	0.664343	0.204699	-2.28843	0.313443	0.496565	Down	0.019276	0	0.0180727	0	0.180756	0	102583101	WRKY48	Probable WRKY transcription factor 48	GO:0005634,GO:0003677,GO:0003700,GO:0043565,GO:0042742,GO:0045893,GO:0009617,GO:0010200	nucleus|DNA binding|DNA-binding transcription factor activity|sequence-specific DNA binding|defense response to bacterium|positive regulation of transcription, DNA-templated|response to bacterium|response to chitin
Soltu.DM.01G019170	239.441	272.475	206.408	0.75773	-0.400245	0.0188342	0.0588484	Down	8.24148	8.91874	8.40411	11.1436	10.6761	12.1618			Probable prefoldin subunit 3	GO:0005737,GO:0005829,GO:0005844,GO:0016272,GO:0015631,GO:0007017,GO:0006457,GO:0007021	cytoplasm|cytosol|polysome|prefoldin complex|tubulin binding|microtubule-based process|protein folding|tubulin complex assembly
Soltu.DM.01G019180	126.693	119.721	133.665	1.11698	0.159603	0.540202	0.703559	Up	9.44438	7.03688	11.4039	10.2761	7.3131	7.5464	102583427		Probable prefoldin subunit 3	GO:0005737,GO:0005829,GO:0005844,GO:0016272,GO:0015631,GO:0007017,GO:0006457,GO:0007021	cytoplasm|cytosol|polysome|prefoldin complex|tubulin binding|microtubule-based process|protein folding|tubulin complex assembly
Soltu.DM.01G019200	671.489	706.977	636.001	0.899874	-0.152205	0.266448	0.443846	Down	16.0185	18.1482	14.845	20.3268	15.244	19.3034	102583760	BHLH148	Transcription factor bHLH148	GO:0005634,GO:0003700,GO:0046983,GO:0043565,GO:0006355,GO:0042542,GO:0006979,GO:0009651	nucleus|DNA-binding transcription factor activity|protein dimerization activity|sequence-specific DNA binding|regulation of transcription, DNA-templated|response to hydrogen peroxide|response to oxidative stress|response to salt stress
Soltu.DM.01G019230	4.32968	6.98776	1.67161	0.237754	-2.07246	0.125938	0.263321	Down	0.27988	0	0.174939	0.186101	0.699869	1.03085	102595157					sot00563	Glycosylphosphatidylinositol (GPI)-anchor biosynthesis
Soltu.DM.01G019360	3428.65	3615.25	3242.04	0.896814	-0.15712	0.0677823	0.164417	Down	81.4726	87.2144	76.168	93.2232	84.1724	97.5568	102593468	CP1	Calcium-binding protein CP1	GO:0005829,GO:0005509,GO:0042538	cytosol|calcium ion binding|hyperosmotic salinity response	sot04016,sot04070,sot04626	MAPK signaling pathway - plant|Phosphatidylinositol signaling system|Plant-pathogen interaction
Soltu.DM.01G019370	3798.18	4232.1	3364.27	0.79488	-0.331191	5.52e-05	0.000352567	Down	34.8906	35.4759	32.1247	43.9503	45.1229	40.6528	102593130
Soltu.DM.01G019390	1860.76	1645.8	2075.72	1.26131	0.334925	6.59e-05	0.000413566	Up	46.9314	47.2726	45.9119	38.6804	35.3893	37.77	102592794	ECHIA	Probable enoyl-CoA hydratase 1, peroxisomal	GO:0005777,GO:0004300,GO:0006635	peroxisome|enoyl-CoA hydratase activity|fatty acid beta-oxidation	sot00071,sot00280,sot00310,sot00360,sot00380,sot00410,sot00640,sot00650,sot00903	Fatty acid degradation|Valine, leucine and isoleucine degradation|Lysine degradation|Phenylalanine metabolism|Tryptophan metabolism|beta-Alanine metabolism|Propanoate metabolism|Butanoate metabolism|Limonene and pinene degradation
Soltu.DM.01G019500	1291.07	1172.73	1409.4	1.20183	0.265234	0.00825587	0.0297507	Up	11.6034	10.5655	12.5588	9.31412	9.60486	10.17	102580545	SIS8	Probable serine/threonine-protein kinase SIS8	GO:0005634,GO:0005524,GO:0004674,GO:0004712,GO:0009651,GO:0010182	nucleus|ATP binding|protein serine/threonine kinase activity|protein serine/threonine/tyrosine kinase activity|response to salt stress|sugar mediated signaling pathway
Soltu.DM.01G019510	1184.99	1311.19	1058.8	0.807585	-0.308314	0.00465666	0.0181984	Down	6.62424	7.38934	7.0888	7.75927	8.76947	9.78539	102577925	PHYB	Phytochrome B	GO:0005622,GO:0000155,GO:0009881,GO:0042803,GO:0009584,GO:0018298,GO:0017006,GO:0009585,GO:0006355	intracellular|phosphorelay sensor kinase activity|photoreceptor activity|protein homodimerization activity|detection of visible light|protein-chromophore linkage|protein-tetrapyrrole linkage|red, far-red light phototransduction|regulation of transcription, DNA-templated	sot04712	Circadian rhythm - plant
Soltu.DM.01G019520	58.4965	33.4391	83.5538	2.5026	1.32343	0.000917109	0.004435	Up	0.598905	0.884963	1.55587	0.410674	0.351005	0.463734	102579671	ACLB-2	ATP-citrate synthase beta chain protein 2	GO:0009346,GO:0005829,GO:0005886,GO:0005524,GO:0003878,GO:0046872,GO:0006085,GO:0006629	citrate lyase complex|cytosol|plasma membrane|ATP binding|ATP citrate synthase activity|metal ion binding|acetyl-CoA biosynthetic process|lipid metabolic process	sot00020	Citrate cycle (TCA cycle)
Soltu.DM.01G019640	4.43652	4.34775	4.5253	1.04506	0.0635803	0.960345	0.978137	Up	0	0.76588	0.569483	0.605817	0.379716	0.305067
Soltu.DM.01G019650	314.894	307.806	321.982	1.04536	0.0640055	0.701038	0.822983	Up	33.3529	27.621	27.4724	24.3386	30.4807	30.2852	107062785
Soltu.DM.01G019660	403.288	377.353	429.222	1.13758	0.185974	0.174839	0.333019	Up	37.8753	40.5405	39.486	32.984	34.3681	37.0048
Soltu.DM.01G019670	203.213	190.925	215.5	1.12879	0.174783	0.376453	0.560829	Up	28.6747	28.4371	22.6021	23.7911	20.4642	26.892
Soltu.DM.01G019680	123.37	111.324	135.417	1.21822	0.284779	0.292015	0.472843	Up	14.3449	21.0874	20.6402	19.1239	11.0543	16.2642
Soltu.DM.01G019690	308.049	287.602	328.496	1.14232	0.191964	0.223895	0.393233	Up	31.3525	29.4602	35.1241	29.7722	28.085	26.664	107062781
Soltu.DM.01G019700	2443.26	2273.89	2612.63	1.14891	0.200268	0.0130199	0.0433828	Up	65.331	68.6253	66.4578	56.107	60.7937	58.6477	102578577
Soltu.DM.01G019710	3704.32	3548.9	3859.73	1.08763	0.121193	0.116188	0.247846	Up	89.3071	97.3157	90.0719	83.1884	83.2152	89.7339	102578577	RPA1B	Replication protein A 70 kDa DNA-binding subunit B	GO:0005662,GO:0000784,GO:0003684,GO:0046872,GO:0043565,GO:0003697,GO:0043047,GO:0006281,GO:0006268,GO:0006261,GO:0000724,GO:0051321,GO:0006289,GO:0010224,GO:0000723,GO:0007004	DNA replication factor A complex|nuclear chromosome, telomeric region|damaged DNA binding|metal ion binding|sequence-specific DNA binding|single-stranded DNA binding|single-stranded telomeric DNA binding|DNA repair|DNA unwinding involved in DNA replication|DNA-dependent DNA replication|double-strand break repair via homologous recombination|meiotic cell cycle|nucleotide-excision repair|response t…
Soltu.DM.01G019770	253.983	298.592	209.374	0.700934	-0.512649	0.00479431	0.0186683	Down	2.27045	2.45232	2.31242	3.02321	3.99874	3.06792	102606238
Soltu.DM.01G019780	3048.13	3336.48	2759.78	0.827063	-0.27393	0.000464069	0.00242004	Down	91.4754	84.0694	83.7107	106.245	105.63	103.571	102605897	PHOS32	Universal stress protein PHOS32	GO:0009507,GO:0005829,GO:0005634,GO:0005886,GO:0005524,GO:0002238	chloroplast|cytosol|nucleus|plasma membrane|ATP binding|response to molecule of fungal origin
Soltu.DM.01G019800	2.13067	1.0002	3.26114	3.26434	1.70679	0.357909	0.543339	Up	0.0197426	0.149362	0.0185102	0	0.0185131	0.039663	102581902	RAM1	GRAS family protein RAM1
Soltu.DM.01G019860	518.143	449.388	586.898	1.30522	0.384291	0.00720304	0.0264891	Up	3.18612	2.95531	2.56729	1.97471	2.50566	2.22907	102601289	ATG16	Autophagy-related protein 16	GO:0000421,GO:0000045,GO:0015031	autophagosome membrane|autophagosome assembly|protein transport
Soltu.DM.01G019870	1657.86	1623.17	1692.56	1.04264	0.0602352	0.540713	0.704003	Up	34.6996	35.4006	29.103	32.1429	31.7092	31.9075	102601628
Soltu.DM.01G019900	677.935	712.574	643.295	0.903033	-0.14715	0.195646	0.359012	Down	7.74421	8.42275	8.32601	9.44337	8.62125	9.24831			Uncharacterized protein C216.01c	GO:0000790,GO:0005634,GO:0030289,GO:0072542,GO:0045875,GO:0006282	nuclear chromatin|nucleus|protein phosphatase 4 complex|protein phosphatase activator activity|negative regulation of sister chromatid cohesion|regulation of DNA repair
Soltu.DM.01G019910	164.083	171.274	156.891	0.916727	-0.125435	0.562864	0.721449	Down	4.73931	5.78765	6.54272	7.07182	6.01887	5.6603	102602525		Uncharacterized protein C216.01c	GO:0000790,GO:0005634,GO:0030289,GO:0072542,GO:0045875,GO:0006282	nuclear chromatin|nucleus|protein phosphatase 4 complex|protein phosphatase activator activity|negative regulation of sister chromatid cohesion|regulation of DNA repair
Soltu.DM.01G019920	88.3687	94.3889	82.3486	0.872372	-0.196984	0.47769	0.652686	Down	3.32434	3.37957	3.27266	4.47617	3.93561	3.08886	102602525	PSY2	Serine/threonine-protein phosphatase 4 regulatory subunit 3	GO:0000794,GO:0030289,GO:0019888,GO:0006974,GO:2000002,GO:1902660,GO:2001034,GO:0006470,GO:0072462	condensed nuclear chromosome|protein phosphatase 4 complex|protein phosphatase regulator activity|cellular response to DNA damage stimulus|negative regulation of DNA damage checkpoint|negative regulation of glucose mediated signaling pathway|positive regulation of double-strand break repair via nonhomologous end joining|protein dephosphorylation|signal transduction involved in meiotic recombinati…
Soltu.DM.01G019930	19.1533	21.434	16.8726	0.786952	-0.345653	0.5732	0.729939	Down	1.20382	0.487902	1.12867	1.77244	0.967589	0.863745
Soltu.DM.01G019940	91.1611	97.2553	85.067	0.875374	-0.192028	0.514876	0.683675	Down	2.68306	2.19903	3.99137	3.63946	3.05272	3.52165	102578495	COL5	Zinc finger protein CONSTANS-LIKE 5	GO:0005634,GO:0003700,GO:0008270,GO:0009909,GO:0006355	nucleus|DNA-binding transcription factor activity|zinc ion binding|regulation of flower development|regulation of transcription, DNA-templated
Soltu.DM.01G019950	807.526	772.003	843.049	1.09238	0.127478	0.279206	0.459151	Up	38.7504	37.7127	44.1036	39.7258	33.3015	38.1366	102602861	SAR2	GTP-binding protein SAR2	GO:0030127,GO:0005783,GO:0070971,GO:0005794,GO:0005525,GO:0003924,GO:0006888,GO:0006886,GO:0061024,GO:0070863,GO:0003400,GO:0016050	COPII vesicle coat|endoplasmic reticulum|endoplasmic reticulum exit site|Golgi apparatus|GTP binding|GTPase activity|ER to Golgi vesicle-mediated transport|intracellular protein transport|membrane organization|positive regulation of protein exit from endoplasmic reticulum|regulation of COPII vesicle coating|vesicle organization	sot04141	Protein processing in endoplasmic reticulum
Soltu.DM.01G019960	3007.59	2451.49	3563.68	1.45382	0.539848	2.53e-12	4.65e-11	Up	38.4872	39.0339	39.2999	27.408	25.3466	28.1568		CAMTA6	Calmodulin-binding transcription activator 6	GO:0005634,GO:0005516,GO:0001077,GO:0043565,GO:0045944,GO:0006355	nucleus|calmodulin binding|proximal promoter DNA-binding transcription activator activity, RNA polymerase II-specific|sequence-specific DNA binding|positive regulation of transcription by RNA polymerase II|regulation of transcription, DNA-templated
Soltu.DM.01G019970	5.98947	6.05166	5.92729	0.980828	-0.0279285	0.980072	0.989111	Down	0.548996	0.346119	0.6863	0.0912609	0.257404	1.28676
Soltu.DM.01G019980	893.519	732.294	1054.74	1.43998	0.526047	4.26e-06	3.36e-05	Up	26.7373	25.9551	27.9957	18.6857	20.7664	16.8948	102603199	CAMTA5	Calmodulin-binding transcription activator 5	GO:0005634,GO:0005516,GO:0003700,GO:0001077,GO:0043565,GO:0070417,GO:0045944,GO:0006355,GO:0009409	nucleus|calmodulin binding|DNA-binding transcription factor activity|proximal promoter DNA-binding transcription activator activity, RNA polymerase II-specific|sequence-specific DNA binding|cellular response to cold|positive regulation of transcription by RNA polymerase II|regulation of transcription, DNA-templated|response to cold
Soltu.DM.01G019990	1254.12	1342.44	1165.8	0.868461	-0.203467	0.0358306	0.0991983	Down	14.9909	13.8192	15.4972	17.9941	16.4042	16.957	102603540	AAE7	Acetate/butyrate--CoA ligase AAE7, peroxisomal	GO:0005777,GO:0003987,GO:0047760,GO:0006083,GO:0019605,GO:0006097	peroxisome|acetate-CoA ligase activity|butyrate-CoA ligase activity|acetate metabolic process|butyrate metabolic process|glyoxylate cycle	sot00010,sot00620,sot00630,sot00650	Glycolysis / Gluconeogenesis|Pyruvate metabolism|Glyoxylate and dicarboxylate metabolism|Butanoate metabolism
Soltu.DM.01G020010	28.7425	22.4684	35.0165	1.55958	0.641159	0.192209	0.354868	Up	1.43276	0.914588	1.30974	0.714514	0.537415	1.11539	102603879
Soltu.DM.01G020020	284.666	322.692	246.64	0.764333	-0.387728	0.0190971	0.0594891	Down	2.81672	3.02369	3.28326	3.87238	4.41407	3.72155	102604436	PPR40	Putative pentatricopeptide repeat-containing protein At3g16890, mitochondrial
Soltu.DM.01G020030	45.1221	49.1454	41.0987	0.836848	-0.256963	0.527281	0.693722	Down	1.0926	0.688841	1.576	1.45301	1.18219	1.40708
Soltu.DM.01G020050	899.823	832.32	967.326	1.16228	0.216963	0.0448536	0.118822	Up	13.018	13.5326	13.9278	12.5117	11.7632	10.7698	102605546	AMSH3	AMSH-like ubiquitin thioesterase 3	GO:0005737,GO:0016021,GO:0005770,GO:0005774,GO:0046872,GO:0008237,GO:0006897,GO:0046907,GO:0090316,GO:0044090,GO:0071108,GO:0070536,GO:0015031,GO:0007033	cytoplasm|integral component of membrane|late endosome|vacuolar membrane|metal ion binding|metallopeptidase activity|endocytosis|intracellular transport|positive regulation of intracellular protein transport|positive regulation of vacuole organization|protein K48-linked deubiquitination|protein K63-linked deubiquitination|protein transport|vacuole organization	sot04144	Endocytosis
Soltu.DM.01G020170	10834.2	11615.1	10053.3	0.865526	-0.20835	0.00430895	0.0170391	Down	113.252	120.55	106.193	133.458	133.197	128.676	102578456	IMPA1	Importin subunit alpha-1	GO:0005618,GO:0005829,GO:0005635,GO:0005643,GO:0005730,GO:0005654,GO:0061608,GO:0008139,GO:0008565,GO:0006607,GO:0006606	cell wall|cytosol|nuclear envelope|nuclear pore|nucleolus|nucleoplasm|nuclear import signal receptor activity|nuclear localization sequence binding|protein transporter activity|NLS-bearing protein import into nucleus|protein import into nucleus	sot03013	Nucleocytoplasmic transport
Soltu.DM.01G020260	123.823	108.715	138.932	1.27834	0.35427	0.191731	0.35428	Up	3.43521	4.20082	4.35914	2.12664	3.13797	4.19436	102580153	GATA17	GATA transcription factor 17	GO:0005634,GO:0003700,GO:0043565,GO:0008270	nucleus|DNA-binding transcription factor activity|sequence-specific DNA binding|zinc ion binding
Soltu.DM.01G020280	5978.49	6233.93	5723.04	0.918038	-0.123373	0.0692527	0.167088	Down	117.431	118.812	114.775	130.659	127.754	126.413	102579606		Probable aldo-keto reductase 2	GO:0016491	oxidoreductase activity
Soltu.DM.01G020290	615.471	717.06	513.881	0.716785	-0.480388	0.0011832	0.00555001	Down	12.8359	11.5595	15.5051	21.5941	18.1546	16.2642	107058135
Soltu.DM.01G020300	16718.9	23664.1	9773.74	0.413037	-1.27566	1.47e-43	1.62e-41	Down	97.3139	99.8352	119.882	261.764	231.697	279.555	102579279	COBL7	COBRA-like protein 7	GO:0031225,GO:0046658,GO:0005768,GO:0005794,GO:0009506,GO:0005802,GO:0010215	anchored component of membrane|anchored component of plasma membrane|endosome|Golgi apparatus|plasmodesma|trans-Golgi network|cellulose microfibril organization
Soltu.DM.01G020310	655.531	741.403	569.659	0.768432	-0.38001	0.00211526	0.00917741	Down	5.04587	4.51387	5.54067	6.37478	6.3259	7.08689	102578736	ARR1	Two-component response regulator ARR1	GO:0005634,GO:0003677,GO:0003700,GO:0000156,GO:0090506,GO:0071368,GO:0009736,GO:0010492,GO:0080022,GO:0031537,GO:0010380,GO:0080036,GO:0010082,GO:0080113,GO:0009735,GO:0009414,GO:0048364,GO:0048367	nucleus|DNA binding|DNA-binding transcription factor activity|phosphorelay response regulator activity|axillary shoot meristem initiation|cellular response to cytokinin stimulus|cytokinin-activated signaling pathway|maintenance of shoot apical meristem identity|primary root development|regulation of anthocyanin metabolic process|regulation of chlorophyll biosynthetic process|regulation of cytokin…
Soltu.DM.01G020330	1010.66	675.482	1345.83	1.99264	0.994684	1.28e-15	3.22e-14	Up	48.9042	44.3032	43.5637	27.4304	20.7884	20.8682	102578393	DI19-4	Protein DEHYDRATION-INDUCED 19 homolog 4	GO:0048471	perinuclear region of cytoplasm
Soltu.DM.01G020340	580.11	604.653	555.567	0.918917	-0.121993	0.343863	0.528915	Down	7.05588	7.54354	6.40869	7.51615	7.03001	8.48173	102606391
Soltu.DM.01G020350	1556.94	1496.94	1616.94	1.08045	0.111627	0.276676	0.456448	Up	17.8162	21.0665	19.1992	18.8758	16.1405	19.1341	102600379
Soltu.DM.01G020380	3117.94	3439.06	2796.83	0.81322	-0.298283	0.000132557	0.000783819	Down	22.0529	23.0349	22.0346	27.1023	28.9468	27.006	102600058	APUM24	Pumilio homolog 24	GO:0005730,GO:0003723,GO:0009793,GO:0006417	nucleolus|RNA binding|embryo development ending in seed dormancy|regulation of translation
Soltu.DM.01G020440	86.2046	48.8147	123.595	2.53331	1.34102	3.05e-06	2.47e-05	Up	1.86947	1.9998	1.6522	0.88645	0.646618	0.66188	102599182
Soltu.DM.01G020460	3.19094	3.72451	2.65737	0.71378	-0.486449	0.772933	0.869894	Down	0.0420129	0	0.0393903	0.104759	0.00984914	0	102598860		Probable protein phosphatase 2C 34	GO:0005886,GO:0046872,GO:0004722,GO:0045926,GO:0006470,GO:1904526,GO:0009414	plasma membrane|metal ion binding|protein serine/threonine phosphatase activity|negative regulation of growth|protein dephosphorylation|regulation of microtubule binding|response to water deprivation
Soltu.DM.01G020470	93.0889	85.7346	100.443	1.17034	0.226928	0.445916	0.624586	Up	4.67146	3.78663	2.39848	2.88432	3.09419	3.35178	102598530	TEN1	CST complex subunit TEN1	GO:0000781,GO:1990879,GO:0044183,GO:0003697,GO:0010521,GO:0042162,GO:0032211,GO:0009408,GO:0048367,GO:0019827,GO:0000723	chromosome, telomeric region|CST complex|protein binding involved in protein folding|single-stranded DNA binding|telomerase inhibitor activity|telomeric DNA binding|negative regulation of telomere maintenance via telomerase|response to heat|shoot system development|stem cell population maintenance|telomere maintenance
Soltu.DM.01G020480	1756.6	1943.7	1569.49	0.807349	-0.308735	0.000697148	0.00347336	Down	10.6052	10.1063	10.3763	12.8476	13.78	12.1066	102597975	PLDZETA1	Phospholipase D zeta 1	GO:0031410,GO:0070290,GO:0004630,GO:0048017,GO:0008610,GO:0016042,GO:0006654,GO:0048364	cytoplasmic vesicle|N-acylphosphatidylethanolamine-specific phospholipase D activity|phospholipase D activity|inositol lipid-mediated signaling|lipid biosynthetic process|lipid catabolic process|phosphatidic acid biosynthetic process|root development	sot00564,sot00565,sot04144	Glycerophospholipid metabolism|Ether lipid metabolism|Endocytosis
Soltu.DM.01G020510	29.3255	30.2683	28.3826	0.936774	-0.0942268	0.847826	0.914601	Down	2.97373	2.81222	2.41635	1.58186	3.34625	3.88325
Soltu.DM.01G020520	170.729	157.689	183.768	1.16588	0.221424	0.325302	0.509441	Up	13.1904	21.384	15.9004	13.4379	15.0195	15.1426	102596342
Soltu.DM.01G020530	149.122	151.976	146.268	0.963006	-0.0543838	0.814469	0.895211	Down	7.81159	11.6182	10.8528	9.13698	11.0543	11.4848
Soltu.DM.01G020550	11.367	13.209	9.52498	0.720206	-0.473519	0.532188	0.697802	Down	0.242444	0.286595	0.31255	0.332492	0.625201	0.213094	102603085		Putative F-box/FBD/LRR-repeat protein At5g22670
Soltu.DM.01G020570	548.518	592.381	504.655	0.851533	-0.231865	0.0870526	0.199876	Down	17.3215	14.3221	14.1118	19.1994	18.2841	16.5561	102577768		26S proteasome regulatory subunit 6B homolog			sot03050	Proteasome
Soltu.DM.01G020580	380.723	438.241	323.205	0.737345	-0.439589	0.00505597	0.0195393	Down	4.09758	4.2459	4.39966	5.75942	6.6703	4.94466			Putative F-box/LRR-repeat protein At3g18150
Soltu.DM.01G020600	64.4399	73.6026	55.2772	0.75096	-0.413191	0.200235	0.364624	Down	3.28136	3.97201	3.32264	5.17103	5.23091	3.75759	102595785
Soltu.DM.01G020810	1.66505	3.00869	0.321417	0.117739	-3.08634	0.184407	0.345459	Down	0	0	0.0637278	0.406763	0.191214	0	102582788
Soltu.DM.01G020840	3429.8	3275.59	3584.02	1.094	0.129615	0.166516	0.321784	Up	85.4316	84.8867	75.5971	70.1624	83.7527	72.1991	102594588	RAP2-3	Ethylene-responsive transcription factor RAP2-3	GO:0005737,GO:0005634,GO:0005886,GO:0003677,GO:0003700,GO:0043565,GO:0008219,GO:0009873,GO:0010286,GO:0045893,GO:0009735,GO:0009723,GO:0009753,GO:0051707	cytoplasm|nucleus|plasma membrane|DNA binding|DNA-binding transcription factor activity|sequence-specific DNA binding|cell death|ethylene-activated signaling pathway|heat acclimation|positive regulation of transcription, DNA-templated|response to cytokinin|response to ethylene|response to jasmonic acid|response to other organism
Soltu.DM.01G020870	1.98619	2.34061	1.63178	0.699283	-0.516052	0.761418	0.861782	Down	0.0715484	0.0676623	0.201246	0.0713619	0.134185	0.287482
Soltu.DM.01G020880	1983.42	1351.43	2615.41	1.93524	0.952514	5.05e-27	2.67e-25	Up	29.9582	33.5828	32.4801	16.127	17.3349	16.4696	102593700	FKBP70	70 kDa peptidyl-prolyl isomerase	GO:0005516,GO:0003755	calmodulin binding|peptidyl-prolyl cis-trans isomerase activity
Soltu.DM.01G020890	420.93	455.01	386.85	0.850628	-0.2334	0.150148	0.299076	Down	6.11739	9.25231	7.85976	8.64884	9.1551	9.70361	102593042	MORF3	Multiple organellar RNA editing factor 3, mitochondrial	GO:0005739,GO:0050897,GO:0046983,GO:0016554,GO:0080156,GO:1900864,GO:0006397	mitochondrion|cobalt ion binding|protein dimerization activity|cytidine to uridine editing|mitochondrial mRNA modification|mitochondrial RNA modification|mRNA processing
Soltu.DM.01G021090	28.5863	20.1381	37.0345	1.83589	0.87648	0.0999051	0.221456	Up	1.20436	1.7717	1.84014	0.800814	1.42215	0.403261
Soltu.DM.01G021170	37.0475	30.9526	43.1425	1.39321	0.478415	0.312382	0.495424	Up	2.60148	4.46717	1.54047	2.25329	2.37527	1.58167	107059049
Soltu.DM.01G021180	464.627	454.95	474.304	1.04207	0.0594502	0.678289	0.80679	Up	10.26	10.0514	8.00666	8.76262	9.58265	8.98964	102603104
Soltu.DM.01G021190	7.63888	8.60964	6.66812	0.77158	-0.374112	0.706544	0.826539	Down	0.568887	0.0489081	0.387908	0.46424	0.630452	0.207799
Soltu.DM.01G021200	10.0731	9.79119	10.355	1.05723	0.0802921	0.92613	0.959048	Up	0.821172	0.365445	0.271733	0.481783	0.135888	0.776347
Soltu.DM.01G021220	49.0372	41.2661	56.8082	1.37502	0.459456	0.202823	0.368196	Up	2.69401	2.4655	2.03696	1.60352	1.99654	1.6586
Soltu.DM.01G021260	4197.51	4866.99	3528.02	0.724829	-0.464287	9.78e-10	1.35e-08	Down	27.2358	26.771	25.3764	36.756	38.0598	35.3822	102592751	IBR3	Probable acyl-CoA dehydrogenase IBR3	GO:0005777,GO:0050660,GO:0016627,GO:0006631,GO:0048767	peroxisome|flavin adenine dinucleotide binding|oxidoreductase activity, acting on the CH-CH group of donors|fatty acid metabolic process|root hair elongation	sot00071,sot00280	Fatty acid degradation|Valine, leucine and isoleucine degradation
Soltu.DM.01G021270	4.54667	7.46156	1.63178	0.219763	-2.18598	0.131602	0.271236	Down	0.117481	0.1111	0.330441	0.585872	0	2.00616
Soltu.DM.01G021330	1.30552	0.338856	2.27219	6.34304	2.66518	0.334549	0.519337	Up	0	0.179982	0	0	0	0.0273108	107059808
Soltu.DM.01G021420	1.35542	2.71085	0	0.0671478	-3.89652	0.180643	0.340676	Down	0	0	0	0	0	0.220375
Soltu.DM.01G021440	2.00332	3.03603	0.970615	0.322353	-1.63329	0.377289	0.561702	Down	0	0.162146	0.0803774	0.171011	0.0803903	0.516691
Soltu.DM.01G021450	16330.5	20011.5	12649.6	0.632099	-0.661776	2.07e-20	7.17e-19	Down	240.42	219.309	227.508	343.595	367.423	383.424	102591415	ATL2	RING-H2 finger protein ATL2	GO:0016021,GO:0046872,GO:0016740,GO:0006952,GO:0016567,GO:0010200	integral component of membrane|metal ion binding|transferase activity|defense response|protein ubiquitination|response to chitin
Soltu.DM.01G021470	211.984	300.593	123.374	0.410516	-1.28449	2.64e-08	3e-07	Down	2.85043	2.24291	2.73369	8.00814	4.38685	6.81937	102590723	srdG	Epoxide hydrolase srdG
Soltu.DM.01G021480	6.25609	11.5384	0.973797	0.0851494	-3.55386	0.0150447	0.0489147	Down	0	0.0656868	0	0.577319	0.0217113	0.186059	102590378	srdG	Epoxide hydrolase srdG
Soltu.DM.01G021490	1315.95	1212.88	1419.01	1.17011	0.226647	0.0258734	0.0762215	Up	29.3973	29.5765	33.5147	28.5403	25.9314	25.0834	102590064	FAHD1	Probable acylpyruvase FAHD1, mitochondrial	GO:0005739,GO:0047621,GO:0005507	mitochondrion|acylpyruvate hydrolase activity|copper ion binding	sot00350	Tyrosine metabolism
Soltu.DM.01G021500	13.2053	19.8094	6.60118	0.333315	-1.58504	0.0260091	0.0765209	Down	0.145123	0.137241	0.116626	0.454913	0.25273	0.499805		AGL28	Agamous-like MADS-box protein AGL28	GO:0005634,GO:0003700,GO:0046983,GO:0000977,GO:0043565,GO:0000982,GO:0008134,GO:0044212,GO:0007275,GO:0009911,GO:0045944	nucleus|DNA-binding transcription factor activity|protein dimerization activity|RNA polymerase II regulatory region sequence-specific DNA binding|sequence-specific DNA binding|transcription factor activity, RNA polymerase II proximal promoter sequence-specific DNA binding|transcription factor binding|transcription regulatory region DNA binding|multicellular organism development|positive regulatio…
Soltu.DM.01G021510	168.083	169.821	166.344	0.979856	-0.0293584	0.890275	0.93894	Down	1.08297	1.28342	0.957524	1.2784	1.0091	1.12915	102589503	GEX2	Protein GAMETE EXPRESSED 2	GO:0005887,GO:0048235	integral component of plasma membrane|pollen sperm cell differentiation
Soltu.DM.01G021550	1536.85	1353.94	1719.76	1.2702	0.345056	0.000210732	0.00119129	Up	22.0339	23.6055	20.473	17.2287	17.0512	18.1197	102589176	BCE2	Lipoamide acyltransferase component of branched-chain alpha-keto acid dehydrogenase complex, mitochondrial	GO:0005737,GO:0005759,GO:0005739,GO:0016407,GO:0004147,GO:0043754,GO:0031405,GO:0008270,GO:0043617,GO:0006633,GO:0009646,GO:0009744	cytoplasm|mitochondrial matrix|mitochondrion|acetyltransferase activity|dihydrolipoamide branched chain acyltransferase activity|dihydrolipoyllysine-residue (2-methylpropanoyl)transferase activity|lipoic acid binding|zinc ion binding|cellular response to sucrose starvation|fatty acid biosynthetic process|response to absence of light|response to sucrose	sot00280,sot00640	Valine, leucine and isoleucine degradation|Propanoate metabolism
Soltu.DM.01G021580	379.637	383.411	375.862	0.979748	-0.0295167	0.858683	0.920585	Down	26.1688	24.56	21.6852	25.837	28.3192	20.1133	102587874	FLZ15	FCS-Like Zinc finger 15	GO:0000932,GO:0046872	P-body|metal ion binding
Soltu.DM.01G021590	663.419	755.322	571.516	0.756353	-0.402869	0.00241226	0.0103102	Down	48.8485	37.0463	46.2452	55.6022	62.7607	57.3527	102587230		Dynein 8 kDa light chain, flagellar outer arm	GO:0005930,GO:0097014,GO:0030286,GO:0005874,GO:0031514,GO:0003774,GO:0007017,GO:0044458	axoneme|ciliary plasm|dynein complex|microtubule|motile cilium|motor activity|microtubule-based process|motile cilium assembly
Soltu.DM.01G021600	19.7436	13.6189	25.8682	1.89903	0.925259	0.159485	0.312055	Up	0.105472	0.155157	0.181295	0.0175329	0.0934092	0.123605	102598688
Soltu.DM.01G021620	9.61123	5.43784	13.7846	2.54728	1.34896	0.170497	0.327018	Up	0.131073	0.2727	0.122891	0.156878	0	0.0526654	102586890		3-hydroxyacyl-CoA dehydrogenase	GO:0009514,GO:0018812,GO:0003857,GO:0008692,GO:0004165,GO:0004300,GO:0006635	glyoxysome|3-hydroxyacyl-CoA dehydratase activity|3-hydroxyacyl-CoA dehydrogenase activity|3-hydroxybutyryl-CoA epimerase activity|dodecenoyl-CoA delta-isomerase activity|enoyl-CoA hydratase activity|fatty acid beta-oxidation	sot00071,sot00592	Fatty acid degradation|alpha-Linolenic acid metabolism
Soltu.DM.01G021660	214.667	247.826	181.509	0.732387	-0.449321	0.0175285	0.0554422	Down	7.82242	6.67305	6.84264	10.9389	8.39397	10.0043	102606026	URH1	Probable uridine nucleosidase 1	GO:0005829,GO:0008477,GO:0045437,GO:0006152	cytosol|purine nucleosidase activity|uridine nucleosidase activity|purine nucleoside catabolic process	sot00240,sot00760	Pyrimidine metabolism|Nicotinate and nicotinamide metabolism
Soltu.DM.01G021690	2586.14	2662	2510.28	0.943099	-0.0845187	0.289208	0.469964	Down	33.7789	36.0463	35.6425	39.1096	36.3645	37.1012	102585342	tif213	Eukaryotic translation initiation factor 2 subunit gamma	GO:0005737,GO:0005829,GO:0005850,GO:0005525,GO:0003924,GO:0003743,GO:0001731	cytoplasm|cytosol|eukaryotic translation initiation factor 2 complex|GTP binding|GTPase activity|translation initiation factor activity|formation of translation preinitiation complex
Soltu.DM.01G021700	5.38398	2.3637	8.40426	3.56028	1.83199	0.175502	0.333766	Up	0.473014	0.0263131	0.182612	0.166511	0.0260916	0		UXS4	UDP-glucuronic acid decarboxylase 4	GO:0005737,GO:0032580,GO:0016021,GO:0005802,GO:0070403,GO:0048040,GO:0042732,GO:0033320	cytoplasm|Golgi cisterna membrane|integral component of membrane|trans-Golgi network|NAD+ binding|UDP-glucuronate decarboxylase activity|D-xylose metabolic process|UDP-D-xylose biosynthetic process
Soltu.DM.01G021720	6716.73	5239.98	8193.48	1.56357	0.644848	9.48e-20	3.12e-18	Up	781.083	792.563	745.889	494.895	513.911	483.986	102585010
Soltu.DM.01G021740	317.304	283.115	351.492	1.24178	0.312406	0.0681597	0.165024	Up	2.26101	1.93517	2.67971	1.72647	1.7616	2.08923	102584479	CERBERUS	Putative E3 ubiquitin-protein ligase LIN-1	GO:0004842,GO:0009877	ubiquitin-protein transferase activity|nodulation
Soltu.DM.01G021750	94.8681	95.5309	94.2052	0.985642	-0.0208638	0.938733	0.965339	Down	10.5072	9.46779	7.24904	10.2821	8.64447	8.86178
Soltu.DM.01G021770	3.83123	3.67004	3.99242	1.08548	0.118336	0.926204	0.95907	Up	0.203913	0.0642792	0.127456	0.203381	0.127476	0.0341385	102583917
Soltu.DM.01G021780	138.918	165.54	112.297	0.679174	-0.558147	0.0266641	0.0780293	Down	1.49638	2.27887	2.58729	3.58583	3.09795	2.75246	102583358	ATJ49	Chaperone protein dnaJ 49	GO:0016021	integral component of membrane	sot04141	Protein processing in endoplasmic reticulum
Soltu.DM.01G021820	223.803	195.631	251.976	1.28907	0.366328	0.0760435	0.179851	Up	1.78574	2.3173	1.77937	1.73316	1.17142	1.69725	102581369	KIN13A	Kinesin-like protein KIN-13A	GO:0005795,GO:0005871,GO:0005874,GO:0005886,GO:0009531,GO:0005524,GO:0016887,GO:0008017,GO:0003777,GO:0090058,GO:0007019,GO:0007018,GO:0009834,GO:1903338,GO:0010090	Golgi stack|kinesin complex|microtubule|plasma membrane|secondary cell wall|ATP binding|ATPase activity|microtubule binding|microtubule motor activity|metaxylem development|microtubule depolymerization|microtubule-based movement|plant-type secondary cell wall biogenesis|regulation of cell wall organization or biogenesis|trichome morphogenesis
Soltu.DM.01G021840	824.21	796.103	852.318	1.07038	0.0981231	0.398272	0.582808	Up	13.4447	11.3002	12.0501	12.3463	11.4828	10.7536	102581930	ESD4	Ubiquitin-like-specific protease ESD4	GO:0031965,GO:0005634,GO:0019900,GO:0070139,GO:0009911,GO:0016926,GO:0009909	nuclear membrane|nucleus|kinase binding|SUMO-specific endopeptidase activity|positive regulation of flower development|protein desumoylation|regulation of flower development
Soltu.DM.01G021850	4142.1	4111.95	4172.26	1.01464	0.0209633	0.789701	0.88069	Up	210.837	190.106	201.951	192.245	193.106	212.882	102581028	RPS21C	40S ribosomal protein S21-2	GO:0005829,GO:0022627,GO:0005634,GO:0003735,GO:0000447,GO:0000461,GO:0006412	cytosol|cytosolic small ribosomal subunit|nucleus|structural constituent of ribosome|endonucleolytic cleavage in ITS1 to separate SSU-rRNA from 5.8S rRNA and LSU-rRNA from tricistronic rRNA transcript (SSU-rRNA, 5.8S rRNA, LSU-rRNA)|endonucleolytic cleavage to generate mature 3'-end of SSU-rRNA from (SSU-rRNA, 5.8S rRNA, LSU-rRNA)|translation	sot03010	Ribosome
Soltu.DM.01G021860	2.95954	2.35563	3.56346	1.51945	0.603549	0.708094	0.827233	Up	0.0214645	0.0405974	0.160997	0	0.0201278	0.129367	102597374		WAT1-related protein At3g30340	GO:0016021,GO:0005886,GO:0022857	integral component of membrane|plasma membrane|transmembrane transporter activity
Soltu.DM.01G021870	8.17001	5.30155	11.0385	2.07606	1.05385	0.351768	0.537116	Up	0.518004	0.38101	0.0269815	0.229624	0.215887	0	107059767
Soltu.DM.01G021880	667.465	758.868	576.061	0.758804	-0.398201	0.00687338	0.0254397	Down	7.2786	4.73998	6.28278	7.65087	8.10251	8.51534	102580475		Probable protein phosphatase 2C 40	GO:0046872,GO:0004722	metal ion binding|protein serine/threonine phosphatase activity
Soltu.DM.01G021890	100.726	106.665	94.7875	0.889592	-0.168785	0.560051	0.718905	Down	1.31549	1.22788	2.17842	1.99365	1.55397	1.80192	102580148	HIPP36	Heavy metal-associated isoprenylated plant protein 36	GO:0046872,GO:0030001	metal ion binding|metal ion transport
Soltu.DM.01G021900	111.343	107.447	115.239	1.07166	0.0998515	0.724062	0.837774	Up	3.68277	2.01759	2.83373	3.16653	2.66747	2.16858	102579826
Soltu.DM.01G021920	526.128	472.425	579.832	1.2274	0.295601	0.0219901	0.0667242	Up	13.2749	12.6589	11.5929	10.6277	9.36741	10.7926	102579175	VAMP724	Vesicle-associated membrane protein 724	GO:0031901,GO:0016021,GO:0005886,GO:0015031,GO:0016192	early endosome membrane|integral component of membrane|plasma membrane|protein transport|vesicle-mediated transport
Soltu.DM.01G021950	2.12307	0	4.24613	23.0743	4.52821	0.0322797	0.0910938	Up	0.11065	0.0348802	0.311229	0	0	0	102578845	FPF1	Flowering-promoting factor 1	GO:0009909	regulation of flower development
Soltu.DM.01G021970	3552.81	3461.09	3644.54	1.05307	0.0745998	0.38737	0.571916	Up	71.7462	69.1162	81.5333	68.6994	68.6913	75.2438	102606266	SRC2	Protein SRC2	GO:0005789,GO:0016021,GO:0005886,GO:0032586	endoplasmic reticulum membrane|integral component of membrane|plasma membrane|protein storage vacuole membrane
Soltu.DM.01G021980	23.1221	32.4062	13.8381	0.42705	-1.22752	0.0343669	0.0958663	Down	0.231845	0.0730841	0.318812	0.508729	0.449307	0.512355			F-box/kelch-repeat protein At3g23880	GO:0005634	nucleus
Soltu.DM.01G021990	21.4586	29.4882	13.429	0.455658	-1.13398	0.0473598	0.12415	Down	0.149814	0.283353	0.218495	0.415064	0.671201	0.351139	107059266		F-box/kelch-repeat protein At3g23880	GO:0005634	nucleus
Soltu.DM.01G022000	1218.93	1278.56	1159.3	0.906903	-0.140979	0.193317	0.356283	Down	14.3219	17.0079	15.0356	16.2822	16.1314	19.0854	102578620	RKL1	Probable inactive receptor kinase At1g48480
Soltu.DM.01G022010	163.286	164.545	162.026	0.984054	-0.0231913	0.915564	0.953064	Down	2.69799	1.77666	2.19847	2.32465	2.21207	2.28446	102605926		F-box/kelch-repeat protein At3g23880	GO:0005634	nucleus
Soltu.DM.01G022020	51.2793	60.5762	41.9824	0.69415	-0.526681	0.145628	0.292238	Down	0.453815	0.64375	0.638228	0.990133	0.691524	0.840489	102596389	ATX1	Histone H3-lysine(4) N-trimethyltransferase ATX1	GO:0000785,GO:0005737,GO:0005634,GO:0005886,GO:0018024,GO:0046872,GO:0010314,GO:0044212,GO:0051568,GO:0035556,GO:0009909,GO:0006355,GO:0010093	chromatin|cytoplasm|nucleus|plasma membrane|histone-lysine N-methyltransferase activity|metal ion binding|phosphatidylinositol-5-phosphate binding|transcription regulatory region DNA binding|histone H3-K4 methylation|intracellular signal transduction|regulation of flower development|regulation of transcription, DNA-templated|specification of floral organ identity
Soltu.DM.01G022030	1587.65	1780.53	1394.77	0.783222	-0.352506	7.57e-05	0.000469626	Down	19.4784	18.6843	18.5764	24.2567	25.3046	23.3223	102605592		Mitochondrial thiamine diphosphate carrier 2	GO:0031305,GO:0005739,GO:0090422,GO:0015234,GO:0030974	integral component of mitochondrial inner membrane|mitochondrion|thiamine pyrophosphate transmembrane transporter activity|thiamine transmembrane transporter activity|thiamine pyrophosphate transmembrane transport
Soltu.DM.01G022040	559.892	689.765	430.019	0.623276	-0.682058	2.9e-07	2.81e-06	Down	9.55262	10.1786	7.86255	14.7965	15.0052	14.7472	102605259
Soltu.DM.01G022050	639.206	634.9	643.513	1.01416	0.0202787	0.884846	0.936072	Up	4.29564	5.1791	5.39475	5.56504	4.17677	5.03149	102604919
Soltu.DM.01G022060	25.5749	24.3666	26.7831	1.10097	0.138778	0.794016	0.883366	Up	1.11135	1.70786	2.60493	1.17773	1.56321	2.23271	102604580	NFYB5	Nuclear transcription factor Y subunit B-5	GO:0005634,GO:0003700,GO:0046982,GO:0043565,GO:0045893	nucleus|DNA-binding transcription factor activity|protein heterodimerization activity|sequence-specific DNA binding|positive regulation of transcription, DNA-templated
Soltu.DM.01G022070	8.74815	2.59765	14.8987	5.66819	2.50289	0.0150408	0.0489082	Up	0.754567	0.594654	0.471642	0.0418112	0.275169	0	102596066	CUL1	Cullin-1	GO:0000794,GO:0031461,GO:0005737,GO:0005829,GO:0005634,GO:0009524,GO:0005819,GO:0031625,GO:0009734,GO:0007049,GO:0009793,GO:0009873,GO:0009867,GO:0048366,GO:0010087,GO:0016567,GO:0042752,GO:0009733,GO:0009753,GO:0006511	condensed nuclear chromosome|cullin-RING ubiquitin ligase complex|cytoplasm|cytosol|nucleus|phragmoplast|spindle|ubiquitin protein ligase binding|auxin-activated signaling pathway|cell cycle|embryo development ending in seed dormancy|ethylene-activated signaling pathway|jasmonic acid mediated signaling pathway|leaf development|phloem or xylem histogenesis|protein ubiquitination|regulation of circ…
Soltu.DM.01G022080	3270.2	3234.9	3305.5	1.02179	0.0310968	0.686736	0.81292	Up	31.3209	31.2633	28.9383	29.4206	29.4683	31.2807		CUL1	Cullin-1	GO:0000794,GO:0031461,GO:0005737,GO:0005829,GO:0005634,GO:0009524,GO:0005819,GO:0031625,GO:0009734,GO:0007049,GO:0009793,GO:0009873,GO:0009867,GO:0048366,GO:0010087,GO:0016567,GO:0042752,GO:0009733,GO:0009753,GO:0006511	condensed nuclear chromosome|cullin-RING ubiquitin ligase complex|cytoplasm|cytosol|nucleus|phragmoplast|spindle|ubiquitin protein ligase binding|auxin-activated signaling pathway|cell cycle|embryo development ending in seed dormancy|ethylene-activated signaling pathway|jasmonic acid mediated signaling pathway|leaf development|phloem or xylem histogenesis|protein ubiquitination|regulation of circ…
Soltu.DM.01G022090	48.4726	58.2064	38.7388	0.665701	-0.587054	0.134413	0.275579	Down	1.16738	1.07052	1.75785	2.22283	2.3884	1.42138		CUL1	Cullin-1	GO:0000794,GO:0031461,GO:0005737,GO:0005829,GO:0005634,GO:0009524,GO:0005819,GO:0031625,GO:0009734,GO:0007049,GO:0009793,GO:0009873,GO:0009867,GO:0048366,GO:0010087,GO:0016567,GO:0042752,GO:0009733,GO:0009753,GO:0006511	condensed nuclear chromosome|cullin-RING ubiquitin ligase complex|cytoplasm|cytosol|nucleus|phragmoplast|spindle|ubiquitin protein ligase binding|auxin-activated signaling pathway|cell cycle|embryo development ending in seed dormancy|ethylene-activated signaling pathway|jasmonic acid mediated signaling pathway|leaf development|phloem or xylem histogenesis|protein ubiquitination|regulation of circ…
Soltu.DM.01G022100	375.905	407.53	344.281	0.845044	-0.242902	0.115427	0.246757	Down	3.04702	3.59964	3.001	3.6143	3.51525	4.37386	102603346	CUL1	Cullin-1	GO:0000794,GO:0031461,GO:0005737,GO:0005829,GO:0005634,GO:0009524,GO:0005819,GO:0031625,GO:0009734,GO:0007049,GO:0009793,GO:0009873,GO:0009867,GO:0048366,GO:0010087,GO:0016567,GO:0042752,GO:0009733,GO:0009753,GO:0006511	condensed nuclear chromosome|cullin-RING ubiquitin ligase complex|cytoplasm|cytosol|nucleus|phragmoplast|spindle|ubiquitin protein ligase binding|auxin-activated signaling pathway|cell cycle|embryo development ending in seed dormancy|ethylene-activated signaling pathway|jasmonic acid mediated signaling pathway|leaf development|phloem or xylem histogenesis|protein ubiquitination|regulation of circ…	sot04120,sot04141	Ubiquitin mediated proteolysis|Protein processing in endoplasmic reticulum
Soltu.DM.01G022120	9.69749	12.828	6.56694	0.511272	-0.967837	0.281179	0.46135	Down	0.0678901	0.0321014	0.116695	0.0451421	0.254649	0.125026		CUL1	Cullin-1	GO:0000794,GO:0031461,GO:0005737,GO:0005829,GO:0005634,GO:0009524,GO:0005819,GO:0031625,GO:0009734,GO:0007049,GO:0009793,GO:0009873,GO:0009867,GO:0048366,GO:0010087,GO:0016567,GO:0042752,GO:0009733,GO:0009753,GO:0006511	condensed nuclear chromosome|cullin-RING ubiquitin ligase complex|cytoplasm|cytosol|nucleus|phragmoplast|spindle|ubiquitin protein ligase binding|auxin-activated signaling pathway|cell cycle|embryo development ending in seed dormancy|ethylene-activated signaling pathway|jasmonic acid mediated signaling pathway|leaf development|phloem or xylem histogenesis|protein ubiquitination|regulation of circ…
Soltu.DM.01G022140	3.97243	3.69873	4.24613	1.15185	0.203954	0.874389	0.930032	Up	0.190319	0.0599939	0.535314	0.189823	0.118978	0.382351
Soltu.DM.01G022150	9.51937	12.4256	6.61314	0.532221	-0.909902	0.266648	0.44409	Down	0.0851538	0.0402644	0.079838	0.148631	0.0798508	0.160382	102603683	CUL1	Cullin-1	GO:0000794,GO:0031461,GO:0005737,GO:0005829,GO:0005634,GO:0009524,GO:0005819,GO:0031625,GO:0009734,GO:0007049,GO:0009793,GO:0009873,GO:0009867,GO:0048366,GO:0010087,GO:0016567,GO:0042752,GO:0009733,GO:0009753,GO:0006511	condensed nuclear chromosome|cullin-RING ubiquitin ligase complex|cytoplasm|cytosol|nucleus|phragmoplast|spindle|ubiquitin protein ligase binding|auxin-activated signaling pathway|cell cycle|embryo development ending in seed dormancy|ethylene-activated signaling pathway|jasmonic acid mediated signaling pathway|leaf development|phloem or xylem histogenesis|protein ubiquitination|regulation of circ…	sot04120,sot04141	Ubiquitin mediated proteolysis|Protein processing in endoplasmic reticulum
Soltu.DM.01G022180	215.171	228.051	202.292	0.88659	-0.173661	0.34317	0.528302	Down	5.57534	4.73551	4.91269	6.02421	5.97847	5.26338	102602675
Soltu.DM.01G022190	282.825	257.504	308.146	1.19703	0.259462	0.229709	0.400398	Up	3.79385	2.91286	4.54312	4.14613	2.77093	2.54062	102602338	DVR	Divinyl chlorophyllide a 8-vinyl-reductase, chloroplastic	GO:0009507,GO:0033728,GO:0015995	chloroplast|divinyl chlorophyllide a 8-vinyl-reductase activity|chlorophyll biosynthetic process	sot00860	Porphyrin metabolism
Soltu.DM.01G022200	5.0145	2.3433	7.6857	3.27756	1.71262	0.191488	0.354035	Up	0.366781	0.317955	0	0.0914563	0.0573233	0.0614054	102602009	IN26	CASP-like protein IN26	GO:0016021,GO:0005886	integral component of membrane|plasma membrane
Soltu.DM.01G022220	45.1664	4.0526	86.2801	21.4721	4.42439	4.5e-14	9.86e-13	Up	1.96494	2.0175	3.07924	0.0559949	0.0263225	0.253773	102601676		CASP-like protein 1E2	GO:0016021,GO:0005886,GO:0051539	integral component of membrane|plasma membrane|4 iron, 4 sulfur cluster binding
Soltu.DM.01G022270	398.326	471.99	324.662	0.687344	-0.540896	0.00113617	0.00535461	Down	8.57361	7.38481	5.97448	9.2215	11.5598	11.3123	102600646
Soltu.DM.01G022280	117.28	122.763	111.797	0.910046	-0.135989	0.604496	0.753088	Down	1.93028	1.93753	1.65103	1.43549	2.31816	2.34717	102600103		Lipase	GO:0046872,GO:0004806,GO:0016042	metal ion binding|triglyceride lipase activity|lipid catabolic process
Soltu.DM.01G022290	7856.55	8645.88	7067.21	0.817387	-0.290908	3.11e-05	0.000208666	Down	56.1909	53.8606	52.0341	65.1145	64.7746	69.743	102599561		Probable chromatin-remodeling complex ATPase chain	GO:0016589,GO:0005524,GO:0016887,GO:0003677,GO:0004386,GO:0031491,GO:0043044	NURF complex|ATP binding|ATPase activity|DNA binding|helicase activity|nucleosome binding|ATP-dependent chromatin remodeling
Soltu.DM.01G022300	1262.41	1223.07	1301.76	1.06448	0.0901537	0.356915	0.542293	Up	20.8619	20.0483	23.2022	20.3526	19.4835	20.8031		PBL27	Serine/threonine-protein kinase PBL27
Soltu.DM.01G022310	276.925	296.228	257.621	0.869512	-0.201722	0.249368	0.423832	Down	9.35993	9.14662	10.7867	11.2804	12.8364	9.75465	102599236	PBL27	Serine/threonine-protein kinase PBL27
Soltu.DM.01G022320	21.9251	14.5862	29.264	2.00321	1.00231	0.0713089	0.170639	Up	2.40208	2.70846	2.77185	1.3822	1.81932	0.742429	102598912	GRXS10	Monothiol glutaredoxin-S10	GO:0005737,GO:0005634,GO:0051537,GO:0009055,GO:0046872,GO:0015035,GO:0045454,GO:0000122	cytoplasm|nucleus|2 iron, 2 sulfur cluster binding|electron transfer activity|metal ion binding|protein disulfide oxidoreductase activity|cell redox homeostasis|negative regulation of transcription by RNA polymerase II
Soltu.DM.01G022330	110.737	85.9292	135.544	1.57786	0.65797	0.00878943	0.0313834	Up	12.8419	12.4065	11.2606	9.30684	6.8441	7.14588	102598582	GRXS3	Monothiol glutaredoxin-S3	GO:0005737,GO:0005634,GO:0051537,GO:0009055,GO:0046872,GO:0015035,GO:0045454	cytoplasm|nucleus|2 iron, 2 sulfur cluster binding|electron transfer activity|metal ion binding|protein disulfide oxidoreductase activity|cell redox homeostasis
Soltu.DM.01G022350	500.167	509.934	490.4	0.962037	-0.0558351	0.683545	0.810814	Down	4.43982	5.16214	5.73119	5.36951	5.44048	5.23542	102597813	ACBP4	Acyl-CoA-binding domain-containing protein 4	GO:0005737,GO:0005829,GO:0005634,GO:0000062,GO:0008289,GO:0006869,GO:0009723,GO:0009753,GO:0009416	cytoplasm|cytosol|nucleus|fatty-acyl-CoA binding|lipid binding|lipid transport|response to ethylene|response to jasmonic acid|response to light stimulus
Soltu.DM.01G022360	455.956	508.673	403.238	0.792564	-0.335401	0.0224396	0.0678549	Down	5.65049	5.05212	4.39473	7.0447	5.74416	6.38542	102597497	APC7	Anaphase-promoting complex subunit 7	GO:0005634,GO:0007049,GO:0051301,GO:0016567	nucleus|cell cycle|cell division|protein ubiquitination	sot04120	Ubiquitin mediated proteolysis
Soltu.DM.01G022370	365.19	379.168	351.213	0.926117	-0.110734	0.46701	0.642557	Down	41.8701	39.2784	33.4833	41.9843	38.1078	44.5327	102581224
Soltu.DM.01G022380	1680.4	1661.71	1699.1	1.02228	0.0317855	0.72589	0.838954	Up	23.2686	21.4108	21.5278	20.9818	22.9349	21.2387	102596844	TON2	Probable serine/threonine-protein phosphatase 2A regulatory subunit B'' subunit TON2	GO:0005813,GO:0005737,GO:0005634,GO:0009524,GO:0005819,GO:0005509,GO:0030865,GO:0000226,GO:0000913,GO:0009826	centrosome|cytoplasm|nucleus|phragmoplast|spindle|calcium ion binding|cortical cytoskeleton organization|microtubule cytoskeleton organization|preprophase band assembly|unidimensional cell growth	sot03015	mRNA surveillance pathway
Soltu.DM.01G022390	42.4781	37.5945	47.3617	1.25934	0.332668	0.402842	0.58707	Up	0.558487	0.589567	0.645396	0.544078	0.560245	0.326164	102596287	ACR4	Serine/threonine-protein kinase-like protein ACR4
Soltu.DM.01G022410	603.21	717.324	489.096	0.68177	-0.552642	6.3e-05	0.000396685	Down	8.16592	7.06849	8.24272	13.0873	11.5941	9.95568		OBGL	GTP-binding protein OBGC, chloroplastic	GO:0009507,GO:0009706,GO:0009570,GO:0005525,GO:0003924,GO:0000287,GO:0009658,GO:0009793,GO:0009416,GO:0006364,GO:0010027	chloroplast|chloroplast inner membrane|chloroplast stroma|GTP binding|GTPase activity|magnesium ion binding|chloroplast organization|embryo development ending in seed dormancy|response to light stimulus|rRNA processing|thylakoid membrane organization
Soltu.DM.01G022430	243.082	283.024	203.141	0.717647	-0.478654	0.0144913	0.0474213	Down	17.5499	14.6051	14.041	26.5285	18.3586	19.9011	102595954	OBGL	GTP-binding protein OBGC, chloroplastic	GO:0009507,GO:0009706,GO:0009570,GO:0005525,GO:0003924,GO:0000287,GO:0009658,GO:0009793,GO:0009416,GO:0006364,GO:0010027	chloroplast|chloroplast inner membrane|chloroplast stroma|GTP binding|GTPase activity|magnesium ion binding|chloroplast organization|embryo development ending in seed dormancy|response to light stimulus|rRNA processing|thylakoid membrane organization
Soltu.DM.01G022450	1288.88	1236.62	1341.14	1.0846	0.117158	0.210756	0.377408	Up	14.03	14.9735	15.3448	13.8351	13.9753	13.3413	102595615		Zinc finger CCCH domain-containing protein 32	GO:0005634,GO:0003677,GO:0046872,GO:0003729	nucleus|DNA binding|metal ion binding|mRNA binding
Soltu.DM.01G022460	1653.72	1849.13	1458.31	0.78843	-0.342946	0.000586885	0.00298054	Down	11.8327	10.6019	10.6203	12.872	15.3388	13.9633	102595287	ALY3	Protein ALWAYS EARLY 3	GO:0005654,GO:0017053,GO:0003677,GO:0000003,GO:0006351	nucleoplasm|transcriptional repressor complex|DNA binding|reproduction|transcription, DNA-templated
Soltu.DM.01G022490	8.71888	11.1397	6.29809	0.565519	-0.822352	0.353384	0.538957	Down	0.458599	0.325268	0.268732	0.971983	0.21502	0.690996	102583801
Soltu.DM.01G022500	669.707	678.694	660.72	0.973094	-0.0393497	0.755569	0.858558	Down	42.1771	39.1315	36.9539	35.8214	44.6166	41.8119	102594734
Soltu.DM.01G022510	995.844	918.649	1073.04	1.16831	0.224428	0.028961	0.0833245	Up	11.1547	12.2815	12.8393	10.5358	10.2644	10.4595	102594181	SNF4	Sucrose nonfermenting 4-like protein	GO:0005737,GO:0005634,GO:0019900,GO:0030295,GO:0019887,GO:0004674,GO:0005975,GO:0042149,GO:0000266,GO:0016559,GO:0009859,GO:0046777,GO:0045859,GO:2000377	cytoplasm|nucleus|kinase binding|protein kinase activator activity|protein kinase regulator activity|protein serine/threonine kinase activity|carbohydrate metabolic process|cellular response to glucose starvation|mitochondrial fission|peroxisome fission|pollen hydration|protein autophosphorylation|regulation of protein kinase activity|regulation of reactive oxygen species metabolic process
Soltu.DM.01G022520	3314.59	3339.66	3289.52	0.984989	-0.0218202	0.776037	0.871962	Down	11.962	12.8395	12.3372	12.6956	12.9601	12.2882	102592530	CWZF7	Cysteine-tryptophan domain-containing zinc finger protein 7
Soltu.DM.01G022530	319.311	289.049	349.573	1.21007	0.275091	0.135345	0.277099	Up	4.45652	5.51439	4.77523	5.18092	3.48702	3.60453	102591514	SRG1	Protein SRG1	GO:0051213,GO:0046872,GO:0016682,GO:0010150	dioxygenase activity|metal ion binding|oxidoreductase activity, acting on diphenols and related substances as donors, oxygen as acceptor|leaf senescence
Soltu.DM.01G022540	181.474	170.644	192.305	1.12734	0.172919	0.507344	0.677383	Up	4.75797	2.75482	6.09966	4.47923	3.36901	4.31608	102591188
Soltu.DM.01G022550	278.569	244.449	312.689	1.27931	0.355361	0.0327204	0.092169	Up	3.4358	2.95946	3.58038	2.83752	2.47281	2.53899	102590828		Probable serine/threonine-protein kinase At1g54610	GO:0005634,GO:0005886,GO:0005524,GO:0004693,GO:0006468	nucleus|plasma membrane|ATP binding|cyclin-dependent protein serine/threonine kinase activity|protein phosphorylation
Soltu.DM.01G022570	23854.8	24146.8	23562.8	0.97581	-0.0353273	0.66441	0.797157	Down	336.821	287.768	298.757	319.803	291.546	341.497	102590483	BAM9	Inactive beta-amylase 9	GO:0005737,GO:0016161,GO:0000272	cytoplasm|beta-amylase activity|polysaccharide catabolic process
Soltu.DM.01G022580	960.311	944.775	975.847	1.03286	0.0466391	0.705691	0.826145	Up	11.5108	8.78046	11.5369	10.9453	9.72405	10.3491	102589959	TULP6	Tubby-like F-box protein 6	GO:0005929,GO:0035091,GO:0061512	cilium|phosphatidylinositol binding|protein localization to cilium
Soltu.DM.01G022590	9.68407	6.36452	13.0036	2.04127	1.02947	0.215195	0.383161	Up	0.443633	0.251723	0.145579	0.132743	0.104001	0.178252	102593089
Soltu.DM.01G022600	3037.07	3276.99	2797.16	0.853553	-0.228447	0.00449448	0.0176512	Down	32.2923	31.5889	29.5035	38.5927	35.2853	36.2451	102589621	NHX1	Sodium/hydrogen exchanger 1	GO:0005789,GO:0000139,GO:0016021,GO:0000325,GO:0005886,GO:0005774,GO:0005773,GO:0005516,GO:0015386,GO:0015385,GO:0048366,GO:0055075,GO:0071805,GO:0051453,GO:0090333,GO:0009651,GO:0098719	endoplasmic reticulum membrane|Golgi membrane|integral component of membrane|plant-type vacuole|plasma membrane|vacuolar membrane|vacuole|calmodulin binding|potassium:proton antiporter activity|sodium:proton antiporter activity|leaf development|potassium ion homeostasis|potassium ion transmembrane transport|regulation of intracellular pH|regulation of stomatal closure|response to salt stress|sodi…
Soltu.DM.01G022630	409.133	353.96	464.305	1.31209	0.391861	0.0146556	0.0478766	Up	11.457	9.42442	11.1635	9.75084	6.92557	7.91809	102588851	PVA22	Vesicle-associated protein 2-2	GO:0005789,GO:0016021,GO:0005886,GO:0046907,GO:0016032	endoplasmic reticulum membrane|integral component of membrane|plasma membrane|intracellular transport|viral process
Soltu.DM.01G022640	1701.87	1266.15	2137.6	1.68784	0.75518	7.11e-16	1.81e-14	Up	84.1892	77.9881	76.3145	44.3895	50.5974	47.166	102588531	ACP1	Acyl carrier protein 1, chloroplastic	GO:0009507,GO:0031177,GO:0006633	chloroplast|phosphopantetheine binding|fatty acid biosynthetic process
Soltu.DM.01G022650	7919.99	7033.72	8806.25	1.25203	0.324272	1.69e-06	1.43e-05	Up	211.341	226.035	220.565	179.096	175.447	174.375	102577750	SODCC.5	Superoxide dismutase [Cu-Zn] 2	GO:0005737,GO:0005615,GO:0005507,GO:0004784,GO:0016532,GO:0008270,GO:0019430	cytoplasm|extracellular space|copper ion binding|superoxide dismutase activity|superoxide dismutase copper chaperone activity|zinc ion binding|removal of superoxide radicals	sot04146	Peroxisome
Soltu.DM.01G022660	732.464	675.612	789.316	1.1681	0.224163	0.0720841	0.172136	Up	33.0689	30.2141	35.8087	24.9947	30.525	29.8441		EMB3004	Shikimate dehydrogenase	GO:0009507,GO:0009570,GO:0003855,GO:0050661,GO:0004764,GO:0009073,GO:0009423,GO:0009793,GO:0019632	chloroplast|chloroplast stroma|3-dehydroquinate dehydratase activity|NADP binding|shikimate 3-dehydrogenase (NADP+) activity|aromatic amino acid family biosynthetic process|chorismate biosynthetic process|embryo development ending in seed dormancy|shikimate metabolic process
Soltu.DM.01G022690	1637.06	1506.31	1767.81	1.17344	0.230739	0.0135132	0.0448146	Up	34.057	32.2424	29.3049	28.1404	27.2918	26.5522	102577865	EMB3004	Shikimate dehydrogenase	GO:0009507,GO:0009570,GO:0003855,GO:0050661,GO:0004764,GO:0009073,GO:0009423,GO:0009793,GO:0019632	chloroplast|chloroplast stroma|3-dehydroquinate dehydratase activity|NADP binding|shikimate 3-dehydrogenase (NADP+) activity|aromatic amino acid family biosynthetic process|chorismate biosynthetic process|embryo development ending in seed dormancy|shikimate metabolic process	sot00400,sot00999	Phenylalanine, tyrosine and tryptophan biosynthesis|Biosynthesis of various plant secondary metabolites
Soltu.DM.01G022780	189.115	183.935	194.296	1.05679	0.0796943	0.707858	0.827136	Up	1.93902	1.81555	1.68298	2.07758	1.3142	1.79348	102580437	ATJ49	Chaperone protein dnaJ 49	GO:0016021	integral component of membrane
Soltu.DM.01G022790	28.1752	34.0121	22.3382	0.657091	-0.605835	0.248224	0.422411	Down	0.145379	0.166426	0.18652	0.122105	0.251125	0.391984	102592152
Soltu.DM.01G022800	1600.1	1418.86	1781.35	1.25549	0.32825	0.000435499	0.002287	Up	24.6187	24.2962	26.3851	18.5966	20.244	21.54	102592492
Soltu.DM.01G022810	440.001	433.622	446.379	1.02919	0.0415134	0.753016	0.857064	Up	10.9588	10.6948	10.908	10.3812	11.1678	10.2792	102580993		U1 small nuclear ribonucleoprotein C	GO:0000243,GO:0005685,GO:0071004,GO:0003729,GO:0030627,GO:0030619,GO:0008270,GO:0000395,GO:0000387	commitment complex|U1 snRNP|U2-type prespliceosome|mRNA binding|pre-mRNA 5'-splice site binding|U1 snRNA binding|zinc ion binding|mRNA 5'-splice site recognition|spliceosomal snRNP assembly	sot03040	Spliceosome
Soltu.DM.01G022910	2154.37	1923.59	2385.15	1.23986	0.31018	0.024611	0.0730782	Up	27.8188	21.5836	25.1475	24.4317	20.4771	15.5496	102577792	TKT2	Probable 1-deoxy-D-xylulose-5-phosphate synthase, chloroplastic	GO:0009507,GO:0008661,GO:0046872,GO:0052865,GO:0016114,GO:0009228	chloroplast|1-deoxy-D-xylulose-5-phosphate synthase activity|metal ion binding|1-deoxy-D-xylulose 5-phosphate biosynthetic process|terpenoid biosynthetic process|thiamine biosynthetic process	sot00730,sot00900	Thiamine metabolism|Terpenoid backbone biosynthesis
Soltu.DM.01G022920	1235	1206.34	1263.66	1.04785	0.0674384	0.575554	0.731771	Up	39.6856	45.9421	54.4224	48.3403	42.0977	44.1409	102582329	RALF	Rapid alkalinization factor	GO:0005576,GO:0005179,GO:0048018,GO:0010469	extracellular region|hormone activity|receptor ligand activity|regulation of signaling receptor activity
Soltu.DM.01G022930	33.3133	34.3286	32.2981	0.942136	-0.0859924	0.868857	0.926823	Down	0.624849	1.55114	1.50122	1.86966	1.42822	0.627662	102582670	HSBP	Heat shock factor-binding protein	GO:0005737,GO:0005829,GO:0005794,GO:0005634,GO:0043621,GO:0003714,GO:0070370,GO:0009408,GO:0048316	cytoplasm|cytosol|Golgi apparatus|nucleus|protein self-association|transcription corepressor activity|cellular heat acclimation|response to heat|seed development
Soltu.DM.01G022940	7578.53	6363.48	8793.58	1.38196	0.466714	9.8e-09	1.18e-07	Up	108.875	119.469	129.381	91.0703	84.994	84.4732	102583005	XXT2	Xyloglucan 6-xylosyltransferase 2	GO:0005768,GO:0005794,GO:0000139,GO:0016021,GO:0005802,GO:0042803,GO:0035252,GO:0033843,GO:0000271,GO:0009969,GO:0010411	endosome|Golgi apparatus|Golgi membrane|integral component of membrane|trans-Golgi network|protein homodimerization activity|UDP-xylosyltransferase activity|xyloglucan 6-xylosyltransferase activity|polysaccharide biosynthetic process|xyloglucan biosynthetic process|xyloglucan metabolic process
Soltu.DM.01G022960	232.459	255.968	208.95	0.816145	-0.293102	0.16676	0.322129	Down	2.99834	2.78744	1.95353	3.85221	2.66866	3.02461	102583336	CPR1	F-box protein CPR1	GO:0005737,GO:0005634,GO:0031348,GO:0042177,GO:0009626,GO:0016567	cytoplasm|nucleus|negative regulation of defense response|negative regulation of protein catabolic process|plant-type hypersensitive response|protein ubiquitination
Soltu.DM.01G023030	95.1088	107.365	82.8524	0.772108	-0.373126	0.199914	0.364273	Down	2.59119	3.80243	4.39812	4.09946	5.65563	4.30818	102594142	R1B-12	Putative late blight resistance protein homolog R1B-12	GO:0005737,GO:0016020,GO:0043531,GO:0005524,GO:0009626	cytoplasm|membrane|ADP binding|ATP binding|plant-type hypersensitive response
Soltu.DM.01G023040	1364.81	1361.24	1368.38	1.00517	0.00743254	0.93394	0.963222	Up	10.4162	9.75001	10.1003	9.91234	10.0236	10.3716	102583655	OVA2	Isoleucine--tRNA ligase, chloroplastic/mitochondrial	GO:0009507,GO:0009570,GO:0005829,GO:0005739,GO:0002161,GO:0005524,GO:0004822,GO:0046872,GO:0000049,GO:0006428,GO:0032543,GO:0048481	chloroplast|chloroplast stroma|cytosol|mitochondrion|aminoacyl-tRNA editing activity|ATP binding|isoleucine-tRNA ligase activity|metal ion binding|tRNA binding|isoleucyl-tRNA aminoacylation|mitochondrial translation|plant ovule development	sot00970	Aminoacyl-tRNA biosynthesis
Soltu.DM.01G023050	2.68986	2.69448	2.68524	0.99476	-0.00757938	0.996355	0.998378	Down	0.163317	0.0617786	0.0306244	0	0.0306293	0.229673	102577760		Basic secretory protease	GO:0046872,GO:0008237	metal ion binding|metallopeptidase activity
Soltu.DM.01G023060	10.981	9.25193	12.7101	1.36785	0.451913	0.594942	0.745891	Up	0.391833	0.247034	0.0524817	0.13027	0.262451	0.112456			F-box/kelch-repeat protein At3g06240
Soltu.DM.01G023100	2.34105	1.00155	3.68055	3.66752	1.87481	0.292098	0.472886	Up	0.292798	0.230746	0	0.0486725	0.0457606	0.0490194	107062523		F-box/kelch-repeat protein At3g06240
Soltu.DM.01G023140	839.212	901.434	776.991	0.862193	-0.213917	0.0733282	0.174533	Down	4.23886	4.82198	4.85549	6.06599	5.21343	4.9676	102584657	TOC159	Translocase of chloroplast 159, chloroplastic	GO:0009507,GO:0009941,GO:0009707,GO:0005829,GO:0016021,GO:0016020,GO:0009536,GO:0061927,GO:0051087,GO:0004930,GO:0005525,GO:0003924,GO:0046872,GO:0043024,GO:0004888,GO:0045037,GO:0045036	chloroplast|chloroplast envelope|chloroplast outer membrane|cytosol|integral component of membrane|membrane|plastid|TOC-TIC supercomplex I|chaperone binding|G protein-coupled receptor activity|GTP binding|GTPase activity|metal ion binding|ribosomal small subunit binding|transmembrane signaling receptor activity|protein import into chloroplast stroma|protein targeting to chloroplast
Soltu.DM.01G023170	239.449	242.816	236.082	0.972274	-0.0405655	0.811019	0.893384	Down	3.29454	3.53287	3.29572	3.28596	3.51692	3.67873	102595792	FBL25	F-box/LRR-repeat protein 25
Soltu.DM.01G023180	49.3596	42.9454	55.7738	1.29754	0.375783	0.300048	0.481492	Up	0.50404	0.534193	0.374801	0.329373	0.407458	0.357909	102585300	BAM3	Leucine-rich repeat receptor-like serine/threonine-protein kinase BAM3
Soltu.DM.01G023200	21.6808	17.2289	26.1327	1.51302	0.597427	0.282785	0.463246	Up	0.552538	0.522528	0.328095	0.238809	0.431774	0.259012	102585639		F-box/kelch-repeat protein At3g06240
Soltu.DM.01G023210	35.3288	35.3059	35.3517	1.0022	0.00317248	0.994347	0.997337	Up	1.12554	2.51587	1.63088	1.58186	1.91899	1.79869	102585639		F-box/kelch-repeat protein At3g06240
Soltu.DM.01G023220	604.706	541.213	668.198	1.23485	0.30433	0.0208153	0.063771	Up	6.79902	6.56329	6.28946	5.15137	4.67292	6.21152	102585974
Soltu.DM.01G023240	509.2	522.587	495.812	0.949208	-0.0752031	0.588359	0.741372	Down	2.73953	3.61209	3.16743	3.44177	3.18029	3.47953	102587317		Pentatricopeptide repeat-containing protein At3g06920
Soltu.DM.01G023290	915.311	1040.71	789.916	0.759186	-0.397475	0.000649665	0.00326779	Down	7.46111	8.57304	9.27218	11.431	11.7157	10.3977	102588065
Soltu.DM.01G023300	14904.6	10712	19097.2	1.78283	0.83417	2.08e-22	8.32e-21	Up	102.993	98.8422	116.453	58.3779	55.2017	66.2185	102588391	ABCC14	ABC transporter C family member 14	GO:0005794,GO:0016021,GO:0016020,GO:0000325,GO:0005774,GO:0005773,GO:0005524,GO:0042626,GO:0008559,GO:0055085	Golgi apparatus|integral component of membrane|membrane|plant-type vacuole|vacuolar membrane|vacuole|ATP binding|ATPase activity, coupled to transmembrane movement of substances|xenobiotic transmembrane transporting ATPase activity|transmembrane transport
Soltu.DM.01G023310	905.277	1023.58	786.971	0.768728	-0.379454	0.000802965	0.00394327	Down	6.88682	6.50489	5.73774	8.97278	7.86524	8.20759	102588722	SCL28	Serine/arginine-rich SC35-like splicing factor SCL28	GO:0016607,GO:0005634,GO:0005681,GO:0003723,GO:0045292,GO:0000398,GO:0000381	nuclear speck|nucleus|spliceosomal complex|RNA binding|mRNA cis splicing, via spliceosome|mRNA splicing, via spliceosome|regulation of alternative mRNA splicing, via spliceosome	sot03040	Spliceosome
Soltu.DM.01G023320	2482.39	2710.51	2254.28	0.83162	-0.266004	0.00164648	0.00738225	Down	19.9983	20.9071	20.1701	23.5332	26.3604	23.9996	102589373	SPL7	Squamosa promoter-binding-like protein 7	GO:0016607,GO:0003677,GO:0046872,GO:0042803,GO:0035874,GO:0048638,GO:0006355	nuclear speck|DNA binding|metal ion binding|protein homodimerization activity|cellular response to copper ion starvation|regulation of developmental growth|regulation of transcription, DNA-templated
Soltu.DM.01G023330	358.847	287.755	429.938	1.49544	0.580569	0.00906744	0.0321944	Up	5.39236	8.00445	7.52883	5.14519	2.92748	6.05389	102582786		Sugar transporter ERD6-like 16	GO:0005887,GO:0005351,GO:0005355,GO:0008645	integral component of plasma membrane|carbohydrate:proton symporter activity|glucose transmembrane transporter activity|hexose transmembrane transport
Soltu.DM.01G023350	513.909	520.385	507.433	0.975408	-0.0359216	0.787297	0.879316	Down	6.4589	6.43862	7.7859	7.41814	6.89569	7.03567	102596469		LEC14B homolog
Soltu.DM.01G023360	168.273	162.241	174.305	1.07434	0.103453	0.619757	0.764502	Up	1.60833	1.53048	1.96973	1.58408	1.72497	1.47421	102590451		Uncharacterized protein C1683.06c	GO:0005829,GO:0005634,GO:0070635,GO:0070636,GO:0008477,GO:0045437,GO:0034356,GO:0019358,GO:0006152,GO:0046135,GO:0008655	cytosol|nucleus|nicotinamide riboside hydrolase activity|nicotinic acid riboside hydrolase activity|purine nucleosidase activity|uridine nucleosidase activity|NAD biosynthesis via nicotinamide riboside salvage pathway|nicotinate nucleotide salvage|purine nucleoside catabolic process|pyrimidine nucleoside catabolic process|pyrimidine-containing compound salvage
Soltu.DM.01G023390	5.64161	7.37684	3.90639	0.531404	-0.912119	0.441769	0.621139	Down	0.079854	0.0755168	0.299476	0.597344	0.224643	0.0401068			Histone H3.2	GO:0000786,GO:0005634,GO:0003677,GO:0046982	nucleosome|nucleus|DNA binding|protein heterodimerization activity
Soltu.DM.01G023400	153.229	147.938	158.521	1.07121	0.0992401	0.657863	0.792576	Up	8.92436	6.85721	7.65413	8.64822	6.98967	6.36686	102590085
Soltu.DM.01G023410	22.5353	23.2342	21.8364	0.937882	-0.0925221	0.862308	0.922589	Down	0.284711	0.207114	0.205337	0.17475	0.318323	0.252994			Uncharacterized protein C1683.06c	GO:0005829,GO:0005634,GO:0070635,GO:0070636,GO:0008477,GO:0045437,GO:0034356,GO:0019358,GO:0006152,GO:0046135,GO:0008655	cytosol|nucleus|nicotinamide riboside hydrolase activity|nicotinic acid riboside hydrolase activity|purine nucleosidase activity|uridine nucleosidase activity|NAD biosynthesis via nicotinamide riboside salvage pathway|nicotinate nucleotide salvage|purine nucleoside catabolic process|pyrimidine nucleoside catabolic process|pyrimidine-containing compound salvage
Soltu.DM.01G023430	35.4178	14.634	56.2017	3.83716	1.94004	4.53e-05	0.000294824	Up	0.538833	0.372376	0.78694	0.144692	0.174904	0.124906			Uncharacterized protein C1683.06c	GO:0005829,GO:0005634,GO:0070635,GO:0070636,GO:0008477,GO:0045437,GO:0034356,GO:0019358,GO:0006152,GO:0046135,GO:0008655	cytosol|nucleus|nicotinamide riboside hydrolase activity|nicotinic acid riboside hydrolase activity|purine nucleosidase activity|uridine nucleosidase activity|NAD biosynthesis via nicotinamide riboside salvage pathway|nicotinate nucleotide salvage|purine nucleoside catabolic process|pyrimidine nucleoside catabolic process|pyrimidine-containing compound salvage
Soltu.DM.01G023440	14.7599	19.9001	9.6198	0.48196	-1.05302	0.123123	0.259191	Down	0.157723	0.0688413	0.113751	0.242018	0.318555	0.146246	102590399		Uncharacterized protein C1683.06c	GO:0005829,GO:0005634,GO:0070635,GO:0070636,GO:0008477,GO:0045437,GO:0034356,GO:0019358,GO:0006152,GO:0046135,GO:0008655	cytosol|nucleus|nicotinamide riboside hydrolase activity|nicotinic acid riboside hydrolase activity|purine nucleosidase activity|uridine nucleosidase activity|NAD biosynthesis via nicotinamide riboside salvage pathway|nicotinate nucleotide salvage|purine nucleoside catabolic process|pyrimidine nucleoside catabolic process|pyrimidine-containing compound salvage
Soltu.DM.01G023450	865.348	793.582	937.115	1.18086	0.239839	0.0221697	0.0671785	Up	23.7648	21.6925	22.9621	19.4568	18.5511	20.325		AHP1	Histidine-containing phosphotransfer protein 1	GO:0005737,GO:0005829,GO:0005634,GO:0009927,GO:0043424,GO:0009736,GO:0000160	cytoplasm|cytosol|nucleus|histidine phosphotransfer kinase activity|protein histidine kinase binding|cytokinin-activated signaling pathway|phosphorelay signal transduction system
Soltu.DM.01G023460	2305.59	2372.75	2238.43	0.943534	-0.0838528	0.341329	0.526485	Down	41.6481	42.82	46.4591	49.8835	43.8892	45.9265	102591537	P4H4	Probable prolyl 4-hydroxylase 4	GO:0005737,GO:0005783,GO:0005789,GO:0005794,GO:0016021,GO:0005634,GO:0005506,GO:0031418,GO:0004656,GO:0018401	cytoplasm|endoplasmic reticulum|endoplasmic reticulum membrane|Golgi apparatus|integral component of membrane|nucleus|iron ion binding|L-ascorbic acid binding|procollagen-proline 4-dioxygenase activity|peptidyl-proline hydroxylation to 4-hydroxy-L-proline	sot00330	Arginine and proline metabolism
Soltu.DM.01G023480	791.714	892.991	690.436	0.773178	-0.371128	0.00254891	0.0108305	Down	10.9707	9.07974	10.2435	14.0491	11.5152	13.8922	102592431		Uncharacterized protein At4g15545	GO:0016021,GO:0022857	integral component of membrane|transmembrane transporter activity
Soltu.DM.01G023490	18613.7	19149.3	18078.2	0.944041	-0.0830781	0.354256	0.539786	Down	382.933	316.672	314.334	330.476	365.291	385.449	107058537
Soltu.DM.01G023510	51.0691	59.1708	42.9674	0.727044	-0.459885	0.228628	0.399386	Down	0.564645	0.643914	0.871948	0.745377	0.825369	1.31788	102593112
Soltu.DM.01G023520	3249.14	3752.36	2745.93	0.731663	-0.450749	1.39e-07	1.42e-06	Down	65.8356	59.1307	57.7249	79.4114	88.2917	83.5304	102593449
Soltu.DM.01G023530	39.6558	17.5096	61.802	3.53584	1.82205	0.000182813	0.00104761	Up	0.695696	0.405456	0.356471	0.217847	0.0682714	0.130015	102593774	PPD	Pyruvate, phosphate dikinase, chloroplastic	GO:0009507,GO:0005524,GO:0016301,GO:0046872,GO:0050242,GO:0015979,GO:0006090	chloroplast|ATP binding|kinase activity|metal ion binding|pyruvate, phosphate dikinase activity|photosynthesis|pyruvate metabolic process	sot00010,sot00620,sot00710	Glycolysis / Gluconeogenesis|Pyruvate metabolism|Carbon fixation in photosynthetic organisms
Soltu.DM.01G023540	148.237	133.964	162.511	1.21265	0.278163	0.221538	0.39085	Up	2.34238	2.65819	1.93536	1.62079	2.01804	2.11764	102594091		Putative pentatricopeptide repeat-containing protein At1g16830
Soltu.DM.01G023550	14.1471	16.7476	11.5467	0.689658	-0.536048	0.454391	0.631441	Down	1.325	2.16434	0.564677	1.56183	1.4684	2.90393
Soltu.DM.01G023560	3831.52	3967.97	3695.07	0.931164	-0.102892	0.199595	0.363833	Down	32.5869	31.3592	28.242	33.5774	32.3551	33.7222	102594650	RF4	Putative E3 ubiquitin-protein ligase RF4	GO:0046872,GO:0016740,GO:0016567	metal ion binding|transferase activity|protein ubiquitination
Soltu.DM.01G023570	102.253	107.842	96.6641	0.896167	-0.15816	0.546363	0.708295	Down	8.56434	9.24452	6.56976	10.1814	8.76108	8.4291	102594976
Soltu.DM.01G023600	22.1872	4.03624	40.3382	10.0436	3.32821	7.85e-06	5.9e-05	Up	0.505271	1.94544	1.7934	0.0719934	0.0676864	0.290026	102595309	MSRB5	Peptide methionine sulfoxide reductase B5	GO:0005829,GO:0046872,GO:0033743,GO:0030091,GO:0006979	cytosol|metal ion binding|peptide-methionine (R)-S-oxide reductase activity|protein repair|response to oxidative stress
Soltu.DM.01G023610	606.813	725.709	487.918	0.672352	-0.572711	9.98e-06	7.37e-05	Down	5.19784	5.3297	5.86749	7.14996	8.68916	8.70593	102595641		Probable protein phosphatase 2C 35	GO:0005886,GO:0046872,GO:0004721	plasma membrane|metal ion binding|phosphoprotein phosphatase activity
Soltu.DM.01G023630	7.35051	5.60499	9.09603	1.62198	0.697753	0.4943	0.667248	Up	0.0777869	0.245207	0.364655	0.155168	0.243142	0.0260457	102580317	GATL4	Probable galacturonosyltransferase-like 4	GO:0005794,GO:0000139,GO:0016021,GO:0090406,GO:0047262,GO:0071555,GO:0045489	Golgi apparatus|Golgi membrane|integral component of membrane|pollen tube|polygalacturonate 4-alpha-galacturonosyltransferase activity|cell wall organization|pectin biosynthetic process
Soltu.DM.01G023640	102.835	95.9873	109.682	1.14231	0.191953	0.495448	0.667783	Up	6.86395	10.1055	7.9712	6.92386	9.21589	5.79795
Soltu.DM.01G023650	301.202	300.693	301.711	1.00392	0.00564256	0.974276	0.986503	Up	5.11746	7.05929	6.42376	5.61031	6.0282	7.03101		AP5M	AP-5 complex subunit mu	GO:0030131,GO:0030659,GO:0006886,GO:0016192	clathrin adaptor complex|cytoplasmic vesicle membrane|intracellular protein transport|vesicle-mediated transport
Soltu.DM.01G023660	152.212	165.544	138.879	0.838616	-0.253917	0.26256	0.439802	Down	6.074	4.99019	4.30671	7.00476	5.30416	6.13948		AP5M	AP-5 complex subunit mu	GO:0030131,GO:0030659,GO:0006886,GO:0016192	clathrin adaptor complex|cytoplasmic vesicle membrane|intracellular protein transport|vesicle-mediated transport
Soltu.DM.01G023710	492.249	522.764	461.733	0.883667	-0.178426	0.20744	0.373764	Down	6.20409	6.94418	7.02511	8.83348	6.87166	7.28574	102605802		Putative MO25-like protein At5g47540	GO:0005622,GO:0023014	intracellular|signal transduction by protein phosphorylation
Soltu.DM.01G023720	1472.69	974.602	1970.78	2.02196	1.01576	2.06e-24	9.31e-23	Up	29.7487	29.8724	27.7206	15.6012	14.7392	13.1166	102605460
Soltu.DM.01G023730	8819.54	9029.12	8609.96	0.953576	-0.0685801	0.299037	0.480339	Down	207.561	203.824	198.499	217.052	206.96	219.844	102605126	LFG5	BI1-like protein	GO:0016021	integral component of membrane
Soltu.DM.01G023750	184.767	182.895	186.639	1.02091	0.0298544	0.890295	0.93894	Up	1.8058	2.38211	2.07051	1.67491	1.97377	2.53026	102604789		Pentatricopeptide repeat-containing protein At5g18950
Soltu.DM.01G023760	885.19	917.181	853.199	0.930286	-0.104253	0.363494	0.54897	Down	17.5608	20.5631	19.0506	21.1602	21.8557	18.8174	102604333	ABCI12	Protein ABCI12, chloroplastic	GO:0009507,GO:0016021	chloroplast|integral component of membrane
Soltu.DM.01G023770	294.947	182.692	407.203	2.22972	1.15686	1.28e-08	1.52e-07	Up	6.59344	5.34216	9.22263	3.51918	2.99115	3.04306		GLN2	Glutamine synthetase, chloroplastic	GO:0009507,GO:0005524,GO:0004356,GO:0006542	chloroplast|ATP binding|glutamate-ammonia ligase activity|glutamine biosynthetic process
Soltu.DM.01G023780	30.2301	19.1926	41.2676	2.14515	1.10108	0.0348021	0.0968177	Up	5.80843	2.92178	6.14104	1.23261	3.36073	2.35866	102603663					sot00220,sot00250,sot00630,sot00910	Arginine biosynthesis|Alanine, aspartate and glutamate metabolism|Glyoxylate and dicarboxylate metabolism|Nitrogen metabolism
Soltu.DM.01G023790	2161.6	1744.13	2579.06	1.47902	0.564638	8.63e-10	1.2e-08	Up	38.2979	42.7971	44.6565	30.1081	26.6445	28.8611	102603324
Soltu.DM.01G023800	1.68894	2.71354	0.664343	0.244545	-2.03183	0.346432	0.531566	Down	0.010484	0	0.00982948	0.0209133	0	0.0631869	102599535
Soltu.DM.01G023810	2412.93	2076.16	2749.71	1.32444	0.405378	3.3e-07	3.15e-06	Up	38.4932	40.1536	37.4068	29.9895	29.037	29.1707	102602768	BPM2	BTB/POZ and MATH domain-containing protein 2	GO:0005634,GO:0071472,GO:0042631,GO:0016567,GO:0006970	nucleus|cellular response to salt stress|cellular response to water deprivation|protein ubiquitination|response to osmotic stress
Soltu.DM.01G023820	4280.73	4348.06	4213.4	0.96902	-0.0454016	0.522536	0.69009	Down	29.6769	30.7655	29.04	30.6312	30.9982	31.3179	102602427	MPK16	Mitogen-activated protein kinase 16	GO:0005737,GO:0005634,GO:0005886,GO:0005773,GO:0005524,GO:0004707,GO:0035556,GO:0010468	cytoplasm|nucleus|plasma membrane|vacuole|ATP binding|MAP kinase activity|intracellular signal transduction|regulation of gene expression
Soltu.DM.01G023840	5.65394	8.71746	2.59043	0.298987	-1.74185	0.151586	0.300802	Down	0	0.177225	0.0585682	0.12461	0.175733	0.501993	102602095		Endo-1,3	GO:0005576,GO:0016787	extracellular region|hydrolase activity
Soltu.DM.01G023860	7.63605	8.68048	6.59163	0.759337	-0.397187	0.665125	0.797537	Down	0.131384	0.0709987	0.158377	0.243362	0.158402	0.0754144	102601428	RNR2A	Ribonucleoside-diphosphate reductase small chain A	GO:0005829,GO:0005971,GO:0046872,GO:0004748,GO:0009263,GO:0006281,GO:0006260,GO:0007275,GO:0051726,GO:0009259	cytosol|ribonucleoside-diphosphate reductase complex|metal ion binding|ribonucleoside-diphosphate reductase activity, thioredoxin disulfide as acceptor|deoxyribonucleotide biosynthetic process|DNA repair|DNA replication|multicellular organism development|regulation of cell cycle|ribonucleotide metabolic process	sot00230,sot00240,sot00480	Purine metabolism|Pyrimidine metabolism|Glutathione metabolism
Soltu.DM.01G023870	175.023	181.656	168.389	0.926461	-0.110197	0.611233	0.75819	Down	1.12388	0.865099	1.21913	1.08836	1.34187	1.05017	102601086	MED33A	Mediator of RNA polymerase II transcription subunit 33A	GO:0016592,GO:0009698,GO:2000762	mediator complex|phenylpropanoid metabolic process|regulation of phenylpropanoid metabolic process
Soltu.DM.01G023880	297.31	304.668	289.952	0.951447	-0.0718052	0.645477	0.783619	Down	3.68515	3.1984	3.36418	3.72391	3.55796	3.55562	102600730	PCMP-E42	Pentatricopeptide repeat-containing protein At5g19020, mitochondrial
Soltu.DM.01G023890	191.36	183.208	199.513	1.08907	0.123091	0.543998	0.706751	Up	7.188	7.60867	8.96019	7.78028	8.00418	6.15372	102600405		Uncharacterized protein At5g19025	GO:0016021,GO:0005840,GO:0003735,GO:0006412	integral component of membrane|ribosome|structural constituent of ribosome|translation
Soltu.DM.01G023900	812.345	791.362	833.328	1.05326	0.074856	0.504296	0.675139	Up	11.622	11.073	12.5133	11.2593	10.3275	12.0819	102600078	HMGCL	Hydroxymethylglutaryl-CoA lyase, mitochondrial	GO:0005759,GO:0005739,GO:0004419,GO:0046872,GO:0046951,GO:0006552,GO:0006629	mitochondrial matrix|mitochondrion|hydroxymethylglutaryl-CoA lyase activity|metal ion binding|ketone body biosynthetic process|leucine catabolic process|lipid metabolic process	sot00280,sot00650,sot04146	Valine, leucine and isoleucine degradation|Butanoate metabolism|Peroxisome
Soltu.DM.01G023910	754.252	716.49	792.015	1.10521	0.144317	0.225327	0.395158	Up	11.7937	10.06	11.9355	9.45708	10.5516	10.7591	102599740	CBSDUF1	DUF21 domain-containing protein At4g14240	GO:0016021	integral component of membrane
Soltu.DM.01G023920	50.1183	43.4001	56.8365	1.3104	0.390013	0.283392	0.463827	Up	0.806891	0.747805	1.11965	0.627735	0.650712	0.778103	102599418	IPT5	Adenylate isopentenyltransferase 5, chloroplastic	GO:0009507,GO:0005739,GO:0009536,GO:0052623,GO:0009824,GO:0005524,GO:0052622,GO:0052381,GO:0009691,GO:0009860,GO:0006400	chloroplast|mitochondrion|plastid|ADP dimethylallyltransferase activity|AMP dimethylallyltransferase activity|ATP binding|ATP dimethylallyltransferase activity|tRNA dimethylallyltransferase activity|cytokinin biosynthetic process|pollen tube growth|tRNA modification	sot00908	Zeatin biosynthesis
Soltu.DM.01G023930	349.407	353.045	345.768	0.979879	-0.0293244	0.854819	0.918404	Down	5.59005	6.17966	7.66283	6.7867	6.56145	6.62208	102599096		UPF0613 protein PB24D3.06c	GO:0005829,GO:0005634,GO:0016787	cytosol|nucleus|hydrolase activity
Soltu.DM.01G023940	80.6963	84.9002	76.4923	0.900443	-0.151293	0.617349	0.762973	Down	10.8562	7.22462	11.8121	9.49113	12.3167	11.5782
Soltu.DM.01G023950	1883.75	1692.49	2075.01	1.22621	0.294201	0.0066508	0.0247346	Up	27.1687	30.9969	34.5382	27.7703	25.1462	23.1658	102598761
Soltu.DM.01G023970	789.461	774.326	804.596	1.03909	0.0553273	0.610233	0.757463	Up	11.1844	11.2723	10.7116	10.2386	10.3686	11.533	102598424		Uncharacterized membrane protein At4g09580	GO:0005783,GO:0016021	endoplasmic reticulum|integral component of membrane
Soltu.DM.01G023980	8.90008	9.57039	8.22977	0.858139	-0.220717	0.795795	0.88439	Down	0.226345	0.187295	0.265269	0.112878	0.424499	0.255785	102598094
Soltu.DM.01G023990	203.072	207.84	198.303	0.953252	-0.0690697	0.727057	0.839575	Down	13.9649	10.869	10.8917	10.9703	13.6168	13.0968		LUL4	Probable E3 ubiquitin-protein ligase LUL4	GO:0046872,GO:0004842	metal ion binding|ubiquitin-protein transferase activity
Soltu.DM.01G024010	771.422	825.42	717.423	0.869564	-0.201636	0.137733	0.280754	Down	19.457	25.7603	23.1785	26.0272	23.0289	30.2202	102597784	LUL4	Probable E3 ubiquitin-protein ligase LUL4	GO:0046872,GO:0004842	metal ion binding|ubiquitin-protein transferase activity
Soltu.DM.01G024020	1198.21	1082.76	1313.66	1.21366	0.27937	0.00982286	0.0343772	Up	13.5736	14.5055	15.5341	12.3797	10.614	13.2115	102597464	HIPP32	Heavy metal-associated isoprenylated plant protein 32	GO:0005618,GO:0046872,GO:0030001	cell wall|metal ion binding|metal ion transport
Soltu.DM.01G024060	182.138	158.689	205.588	1.29635	0.37445	0.0702026	0.168736	Up	2.32881	2.07341	2.4071	1.94884	1.40614	1.9399	102596040	DSPTP1	Dual specificity protein phosphatase 1	GO:0005737,GO:0005634,GO:0005516,GO:0004725,GO:0008138,GO:0006470	cytoplasm|nucleus|calmodulin binding|protein tyrosine phosphatase activity|protein tyrosine/serine/threonine phosphatase activity|protein dephosphorylation
Soltu.DM.01G024080	696.16	602.49	789.83	1.31102	0.390694	0.00141914	0.00651197	Up	13.1512	11.6227	14.103	9.44623	9.57767	10.8363	102595370	GIP2	Probable aspartic proteinase GIP2
Soltu.DM.01G024100	47.4258	49.7267	45.1249	0.907591	-0.139887	0.803834	0.888877	Down	0.560127	0.688616	1.20787	1.28493	1.2781	0.15004	102589423	GIP2	Probable aspartic proteinase GIP2
Soltu.DM.01G024120	12.1426	9.72708	14.5581	1.49739	0.582448	0.421224	0.603315	Up	0.344873	0.163071	0.30538	0.210206	0.125765	0.211704	102590526	GIP2	Probable aspartic proteinase GIP2
Soltu.DM.01G024130	35.2368	33.6975	36.7761	1.09203	0.127012	0.769882	0.86762	Up	1.34145	1.11002	2.04378	1.42158	1.37584	1.34749	102589017	MUCI70	Probable hexosyltransferase MUCI70
Soltu.DM.01G024140	316.618	283.892	349.343	1.23089	0.299702	0.0786675	0.184712	Up	6.01095	5.05999	6.17548	5.53931	4.11235	4.45623	102590210	GIP2	Probable aspartic proteinase GIP2
Soltu.DM.01G024150	6.11247	5.99697	6.22796	1.03927	0.0555689	0.957487	0.976586	Up	0.086117	0.223959	0.0807411	0.193258	0.14132	0.0432524	102589892	GIP2	Probable aspartic proteinase GIP2
Soltu.DM.01G024160	3.53914	3.66734	3.41093	0.923901	-0.11419	0.937985	0.964956	Down	0.133056	0.013981	0	0.0589817	0.0554531	0.0445515	102589558	GIP2	Probable aspartic proteinase GIP2
Soltu.DM.01G024170	110.183	92.1294	128.237	1.39143	0.476571	0.111034	0.239354	Up	2.42665	2.65547	1.3976	1.21016	1.47909	2.00229	102577478	GIP2	Probable aspartic proteinase GIP2
Soltu.DM.01G024180	6261.71	4943.99	7579.44	1.53304	0.616391	4.24e-13	8.45e-12	Up	143.48	121.505	144.139	93.6372	88.7645	86.1592	102588581	GIP2	Probable aspartic proteinase GIP2
Soltu.DM.01G024190	487.804	325.074	650.535	2.0001	1.00007	6.52e-08	6.96e-07	Up	11.4514	8.89741	13.6433	4.70088	7.20924	5.16642	102577711	GIP2	Probable aspartic proteinase GIP2
Soltu.DM.01G024200	75.2594	44.6456	105.873	2.37654	1.24886	0.000191114	0.00109012	Up	1.50956	2.02389	2.36484	0.971983	0.53755	0.998105	102588245	GIP2	Probable aspartic proteinase GIP2
Soltu.DM.01G024240	2.61633	0	5.23266	28.4339	4.82954	0.0119189	0.0403009	Up	0.0656271	0.165501	0.102551	0	0	0		GIP2	Probable aspartic proteinase GIP2
Soltu.DM.01G024260	1.45736	0.340202	2.57452	7.19512	2.84702	0.248938	0.423363	Up	0	0.0206876	0.143571	0.0218187	0	0		GIP2	Probable aspartic proteinase GIP2
Soltu.DM.01G024300	20397.4	23394.7	17400.1	0.743754	-0.427102	3.14e-06	2.54e-05	Down	475.081	371.142	419.758	578.552	522.389	613.057	102586714	TSJT1	Stem-specific protein TSJT1
Soltu.DM.01G024330	3996.3	4474.22	3518.37	0.786303	-0.346843	3.27e-06	2.63e-05	Down	295.732	275.791	269.964	353.381	355.625	368.178
Soltu.DM.01G024340	5806.54	6333.36	5279.72	0.833642	-0.262499	0.000454206	0.00237312	Down	294.266	281.195	286.183	337.828	327.853	375.098	102577612	NFYC3	Nuclear transcription factor Y subunit C-3	GO:0005634,GO:0003677,GO:0003700,GO:0046982,GO:0003712,GO:0009738,GO:0009740,GO:0048574,GO:2000306,GO:0010029	nucleus|DNA binding|DNA-binding transcription factor activity|protein heterodimerization activity|transcription coregulator activity|abscisic acid-activated signaling pathway|gibberellic acid mediated signaling pathway|long-day photoperiodism, flowering|positive regulation of photomorphogenesis|regulation of seed germination
Soltu.DM.01G024350	1756.87	1902.22	1611.52	0.847079	-0.239431	0.01299	0.0433078	Down	28.1341	25.3696	24.252	33.2107	29.672	29.4909	102584947		ATP-dependent (S)-NAD(P)H-hydrate dehydratase	GO:0052855,GO:0005524,GO:0047453,GO:0046496	ADP-dependent NAD(P)H-hydrate dehydratase activity|ATP binding|ATP-dependent NAD(P)H-hydrate dehydratase activity|nicotinamide nucleotide metabolic process
Soltu.DM.01G024380	1782.95	1889.08	1676.82	0.887775	-0.171734	0.0589003	0.147352	Down	19.9329	20.9647	20.8559	25.3111	21.8542	22.8649	102584079	ECR1	NEDD8-activating enzyme E1 catalytic subunit	GO:0005737,GO:0005634,GO:0016881,GO:0005524,GO:0019781,GO:0046982,GO:0045116	cytoplasm|nucleus|acid-amino acid ligase activity|ATP binding|NEDD8 activating enzyme activity|protein heterodimerization activity|protein neddylation	sot04120	Ubiquitin mediated proteolysis
Soltu.DM.01G024400	390.42	350.64	430.199	1.22715	0.295314	0.0431726	0.115147	Up	12.8107	12.6684	15.3034	10.6694	11.0678	11.7253	102583739	PRXIIF	Peroxiredoxin-2F, mitochondrial	GO:0005737,GO:0005759,GO:0005739,GO:0008379,GO:0045454,GO:0034599,GO:0042744	cytoplasm|mitochondrial matrix|mitochondrion|thioredoxin peroxidase activity|cell redox homeostasis|cellular response to oxidative stress|hydrogen peroxide catabolic process
Soltu.DM.01G024420	696.233	408.674	983.791	2.40691	1.26718	5.1e-16	1.32e-14	Up	18.7287	24.6372	23.5293	7.14161	10.498	10.3319	102583410	RHF1A	E3 ubiquitin-protein ligase RHF1A	GO:0016020,GO:0046872,GO:0004842,GO:0009561,GO:0055046,GO:0010498,GO:0016567,GO:0051726	membrane|metal ion binding|ubiquitin-protein transferase activity|megagametogenesis|microgametogenesis|proteasomal protein catabolic process|protein ubiquitination|regulation of cell cycle
Soltu.DM.01G024430	443.135	519.486	366.785	0.705988	-0.502284	0.000657271	0.00330064	Down	6.28591	5.13171	6.60452	9.24461	8.54932	7.88853	102583081	RH58	DEAD-box ATP-dependent RNA helicase 58, chloroplastic	GO:0009507,GO:0005524,GO:0004386,GO:0003723	chloroplast|ATP binding|helicase activity|RNA binding
Soltu.DM.01G024440	44.7121	29.3455	60.0787	2.04522	1.03225	0.0246941	0.0732896	Up	1.24121	0.419212	0.92821	0.545298	0.443395	0.282014	102582750	AGPS3	Glucose-1-phosphate adenylyltransferase large subunit 3, chloroplastic/amyloplastic	GO:0009501,GO:0009507,GO:0005524,GO:0008878,GO:0005978,GO:0019252	amyloplast|chloroplast|ATP binding|glucose-1-phosphate adenylyltransferase activity|glycogen biosynthetic process|starch biosynthetic process	sot00500,sot00520	Starch and sucrose metabolism|Amino sugar and nucleotide sugar metabolism
Soltu.DM.01G024450	689.962	505.196	874.728	1.73187	0.792331	1.02e-10	1.59e-09	Up	22.5362	23.7016	27.8276	14.5698	14.1611	14.3236	102582402		Uncharacterized GPI-anchored protein At5g19250	GO:0031225,GO:0046658	anchored component of membrane|anchored component of plasma membrane
Soltu.DM.01G024460	138.365	174.483	102.247	0.586279	-0.770341	0.000508074	0.00262347	Down	1.92045	2.38751	2.12426	3.83089	3.68264	3.53306	102582080
Soltu.DM.01G024470	326.839	319.17	334.509	1.04822	0.0679359	0.667709	0.79956	Up	5.12856	6.15578	6.20386	5.15097	6.00307	5.638	102581754	PNC1	Peroxisomal adenine nucleotide carrier 1	GO:0005779,GO:0005777,GO:0015217,GO:0015297,GO:0005347,GO:0015866,GO:0015867,GO:0006635,GO:0007031,GO:0090351	integral component of peroxisomal membrane|peroxisome|ADP transmembrane transporter activity|antiporter activity|ATP transmembrane transporter activity|ADP transport|ATP transport|fatty acid beta-oxidation|peroxisome organization|seedling development
Soltu.DM.01G024480	22.4004	18.3614	26.4394	1.44221	0.528282	0.363884	0.549328	Up	0.173017	0.194299	0.466372	0.150995	0.182523	0.249832	102581424	NPK1	Mitogen-activated protein kinase kinase kinase NPK1	GO:0005856,GO:0005634,GO:0009524,GO:0005524,GO:0004709,GO:0000919,GO:0006952	cytoskeleton|nucleus|phragmoplast|ATP binding|MAP kinase kinase kinase activity|cell plate assembly|defense response
Soltu.DM.01G024490	55.7911	39.7636	71.8186	1.80328	0.850622	0.0613346	0.152102	Up	1.99726	0.595377	1.954	0.541319	1.16037	0.82867	102601971	FAF3	Protein FANTASTIC FOUR 3
Soltu.DM.01G024500	1311.49	1265.69	1357.3	1.07227	0.100669	0.320482	0.504317	Up	17.1262	17.3224	15.1637	14.418	15.4365	16.7247	102581088	KAPP	Protein phosphatase 2C 70	GO:0016021,GO:0005886,GO:0050408,GO:0046872,GO:0004722	integral component of membrane|plasma membrane|[pyruvate kinase]-phosphatase activity|metal ion binding|protein serine/threonine phosphatase activity
Soltu.DM.01G024510	2741.27	3026.3	2456.25	0.811578	-0.301198	0.0011986	0.00561262	Down	38.3806	42.6191	36.3534	45.1292	52.203	48.167			Putative methyltransferase SPBC8D2.16c	GO:0005829,GO:0005730,GO:0005634,GO:0008168,GO:0000070	cytosol|nucleolus|nucleus|methyltransferase activity|mitotic sister chromatid segregation
Soltu.DM.01G024520	395.236	398.316	392.157	0.984313	-0.0228104	0.880106	0.933298	Down	8.58808	9.18274	6.89879	8.45808	8.41747	8.34496	102580405	PEX7	Peroxisome biogenesis protein 7	GO:0080008,GO:0005778,GO:0006625	Cul4-RING E3 ubiquitin ligase complex|peroxisomal membrane|protein targeting to peroxisome	sot04146	Peroxisome
Soltu.DM.01G024530	4.62525	7.31563	1.93487	0.266551	-1.90752	0.128477	0.267205	Down	0	0.101685	0.201625	0.321733	0.453728	0.378031	102580750
Soltu.DM.01G024540	769.199	797.273	741.126	0.929782	-0.105036	0.360405	0.545781	Down	5.07466	5.32584	6.08864	5.77688	5.95365	6.12467	102580079	CHR12	Probable ATP-dependent DNA helicase CHR12	GO:0005634,GO:0005524,GO:0004386,GO:0042393,GO:0006325,GO:0010078,GO:0010231,GO:0010492,GO:0040008,GO:0009408,GO:0009651,GO:0009414	nucleus|ATP binding|helicase activity|histone binding|chromatin organization|maintenance of root meristem identity|maintenance of seed dormancy|maintenance of shoot apical meristem identity|regulation of growth|response to heat|response to salt stress|response to water deprivation
Soltu.DM.01G024550	694.643	705.867	683.418	0.968516	-0.0461517	0.695552	0.819082	Down	7.74683	9.06863	9.0395	9.31857	8.76108	8.79842	102577808	RANGAP2	RAN GTPase-activating protein 2	GO:0009507,GO:0005783,GO:0005635,GO:0031965,GO:0009524,GO:0005819,GO:0005774,GO:0005096,GO:0006913,GO:0009651	chloroplast|endoplasmic reticulum|nuclear envelope|nuclear membrane|phragmoplast|spindle|vacuolar membrane|GTPase activator activity|nucleocytoplasmic transport|response to salt stress	sot03013	Nucleocytoplasmic transport
Soltu.DM.01G024570	1735.26	2256.2	1214.32	0.538263	-0.893618	0.00116955	0.00549222	Down	34.9458	35.7771	52.3903	81.3971	56.7354	92.4209
Soltu.DM.01G024580	2379.04	3139.54	1618.53	0.515562	-0.955783	0.000820786	0.00402039	Down	40.1204	38.5556	60.6449	95.7849	68.1015	108.478	102579218
Soltu.DM.01G024590	555.657	600.781	510.534	0.849633	-0.235088	0.0701449	0.168631	Down	5.39885	5.88709	5.11348	6.56064	6.93271	5.9212		URA7	CTP synthase	GO:0097268,GO:0005524,GO:0003883,GO:0044210,GO:0006541,GO:0019856	cytoophidium|ATP binding|CTP synthase activity|'de novo' CTP biosynthetic process|glutamine metabolic process|pyrimidine nucleobase biosynthetic process
Soltu.DM.01G024650	301.734	357.446	246.022	0.687824	-0.539888	0.00224549	0.00965495	Down	6.62551	5.23237	4.81695	7.28066	7.84788	9.27077	102578217
Soltu.DM.01G024660	460.51	510.948	410.071	0.802083	-0.318177	0.0334967	0.0939483	Down	8.3394	7.52326	6.00127	8.97432	9.62073	8.81783	102605755
Soltu.DM.01G024670	903.572	1222.99	584.153	0.47763	-1.06603	0.0172983	0.0548334	Down	10.9115	18.176	7.85073	22.0041	36.1679	19.5243	102605418	P	Myb-related protein P	GO:0005634,GO:0043565,GO:0044212,GO:0030154	nucleus|sequence-specific DNA binding|transcription regulatory region DNA binding|cell differentiation
Soltu.DM.01G024680	1415.35	857.037	1973.66	2.30334	1.20373	2.34e-33	1.73e-31	Up	30.238	33.5508	33.469	15.4589	13.599	13.4468	102605081	ERDJ3B	DnaJ protein ERDJ3B	GO:0005783,GO:0005788,GO:0005886,GO:0051082,GO:0052033,GO:0006457	endoplasmic reticulum|endoplasmic reticulum lumen|plasma membrane|unfolded protein binding|pathogen-associated molecular pattern dependent induction by symbiont of host innate immune response|protein folding	sot04141	Protein processing in endoplasmic reticulum
Soltu.DM.01G024690	1289.99	1181.75	1398.23	1.18319	0.242679	0.00875209	0.0312591	Up	13.6001	14.2535	14.4033	11.4555	12.2671	12.2244	102604741	PLIP2	Phospholipase A1 PLIP2, chloroplastic	GO:0009507,GO:0031969,GO:0009570,GO:0102549,GO:0052740,GO:0047714,GO:0052739,GO:0008970,GO:0002213,GO:0016042,GO:0031349	chloroplast|chloroplast membrane|chloroplast stroma|1-18:1-2-16:0-monogalactosyldiacylglycerol lipase activity|1-acyl-2-lysophosphatidylserine acylhydrolase activity|galactolipase activity|phosphatidylserine 1-acylhydrolase activity|phospholipase A1 activity|defense response to insect|lipid catabolic process|positive regulation of defense response
Soltu.DM.01G024700	2865.05	2900.04	2830.05	0.975795	-0.0353503	0.687725	0.813411	Down	73.0622	73.3705	62.0111	71.5111	70.6206	72.8836	102604407
Soltu.DM.01G024710	6.1621	7.40978	4.91442	0.665036	-0.588496	0.59246	0.744286	Down	0.0215184	0.0610491	0.0201751	0.0214624	0.0201784	0.115282	102594563		BRCT domain-containing protein At4g02110			sot03440	Homologous recombination
Soltu.DM.01G024720	430.042	591.635	268.45	0.454152	-1.13875	2.24e-12	4.15e-11	Down	2.62062	3.18965	3.68554	7.24843	5.98428	7.84852	102603853
Soltu.DM.01G024760	4236.31	3734.4	4738.22	1.26888	0.343557	0.00014791	0.000864452	Up	122.313	111.613	138.838	99.8722	92.8093	103.105	102602834	SAR1A	GTP-binding protein SAR1A	GO:0030127,GO:0005783,GO:0070971,GO:0005794,GO:0005886,GO:0005525,GO:0003924,GO:0006888,GO:0006886,GO:0061024,GO:0070863,GO:0003400,GO:0016050	COPII vesicle coat|endoplasmic reticulum|endoplasmic reticulum exit site|Golgi apparatus|plasma membrane|GTP binding|GTPase activity|ER to Golgi vesicle-mediated transport|intracellular protein transport|membrane organization|positive regulation of protein exit from endoplasmic reticulum|regulation of COPII vesicle coating|vesicle organization	sot04141	Protein processing in endoplasmic reticulum
Soltu.DM.01G024770	76.531	90.0351	63.0269	0.700919	-0.512679	0.0981214	0.21841	Down	1.14378	1.81012	1.335	2.18847	1.66355	2.32131	102602499	SUD1	Probable E3 ubiquitin ligase SUD1	GO:0030176,GO:0004842,GO:0008270,GO:0042335,GO:0010143,GO:0008299,GO:1900490,GO:0009414,GO:0010345,GO:0030433,GO:0010025	integral component of endoplasmic reticulum membrane|ubiquitin-protein transferase activity|zinc ion binding|cuticle development|cutin biosynthetic process|isoprenoid biosynthetic process|positive regulation of hydroxymethylglutaryl-CoA reductase (NADPH) activity|response to water deprivation|suberin biosynthetic process|ubiquitin-dependent ERAD pathway|wax biosynthetic process
Soltu.DM.01G024780	89.2472	95.535	82.9595	0.868658	-0.20314	0.468283	0.643537	Down	0.525972	0.674114	0.473672	0.738583	0.603541	0.597858	102602160	MSH6	DNA mismatch repair protein MSH6	GO:0032300,GO:0032301,GO:0005524,GO:0003684,GO:0008094,GO:0000400,GO:0035064,GO:0030983,GO:0036297,GO:0043570,GO:0000710,GO:0006298,GO:0007095,GO:0032876,GO:0045910,GO:0051096,GO:0006290,GO:0043111,GO:0009411	mismatch repair complex|MutSalpha complex|ATP binding|damaged DNA binding|DNA-dependent ATPase activity|four-way junction DNA binding|methylated histone binding|mismatched DNA binding|interstrand cross-link repair|maintenance of DNA repeat elements|meiotic mismatch repair|mismatch repair|mitotic G2 DNA damage checkpoint|negative regulation of DNA endoreduplication|negative regulation of DNA recom…	sot03430	Mismatch repair
Soltu.DM.01G024790	1734.44	1843.59	1625.29	0.881574	-0.181847	0.0388361	0.10588	Down	11.1348	10.5966	11.6209	12.0956	12.7382	13.2494		ATG16	Autophagy-related protein 16	GO:0000421,GO:0000045,GO:0015031	autophagosome membrane|autophagosome assembly|protein transport
Soltu.DM.01G024800	174.964	176.534	173.394	0.98158	-0.0268216	0.90736	0.949112	Down	4.28851	5.23147	3.30705	3.79645	5.23502	4.1039	102601826
Soltu.DM.01G024810	137.497	122.484	152.51	1.24682	0.318256	0.224788	0.39441	Up	1.12104	1.83691	1.97725	1.3506	1.08246	1.56092	102601493	MCM7	DNA replication licensing factor MCM7	GO:0005737,GO:0042555,GO:0000347,GO:0005524,GO:0003677,GO:0003678,GO:0007049,GO:0006270	cytoplasm|MCM complex|THO complex|ATP binding|DNA binding|DNA helicase activity|cell cycle|DNA replication initiation	sot03030	DNA replication
Soltu.DM.01G024820	59.4889	55.7482	63.2297	1.13542	0.183222	0.601615	0.751015	Up	0.536657	0.717132	0.896929	0.511986	0.601695	0.79689	102601156	VPS51	Vacuolar protein sorting-associated protein 51 homolog	GO:0005829,GO:1990745,GO:0000938,GO:0005770,GO:0055037,GO:0006914,GO:0032456,GO:0010305,GO:0006869,GO:0007041,GO:0015031,GO:0042147,GO:0007034,GO:0016192	cytosol|EARP complex|GARP complex|late endosome|recycling endosome|autophagy|endocytic recycling|leaf vascular tissue pattern formation|lipid transport|lysosomal transport|protein transport|retrograde transport, endosome to Golgi|vacuolar transport|vesicle-mediated transport
Soltu.DM.01G024850	2195.03	2204.84	2185.22	0.991212	-0.0127348	0.877736	0.932065	Down	134.273	142.93	140.904	148.585	136.742	139.294	102600815	BZIP53	bZIP transcription factor 53	GO:0005634,GO:0003700,GO:0045735,GO:0046982,GO:0043565,GO:0044212,GO:0009267,GO:0006971,GO:2000693,GO:0045893	nucleus|DNA-binding transcription factor activity|nutrient reservoir activity|protein heterodimerization activity|sequence-specific DNA binding|transcription regulatory region DNA binding|cellular response to starvation|hypotonic response|positive regulation of seed maturation|positive regulation of transcription, DNA-templated
Soltu.DM.01G024860	73.4385	81.6115	65.2655	0.799925	-0.322063	0.300344	0.481842	Down	2.36738	1.6791	2.57865	3.2293	2.38318	2.72775	102600488	CP12-1	Calvin cycle protein CP12-1, chloroplastic	GO:0009507,GO:0009941,GO:0009570,GO:0032991,GO:0005507,GO:0016151,GO:0080153,GO:0019253,GO:0009744	chloroplast|chloroplast envelope|chloroplast stroma|protein-containing complex|copper ion binding|nickel cation binding|negative regulation of reductive pentose-phosphate cycle|reductive pentose-phosphate cycle|response to sucrose
Soltu.DM.01G024870	1.32589	0	2.65177	14.3901	3.847	0.144218	0.29014	Up	0.0717883	0.113149	0	0	0	0	107060920
Soltu.DM.01G024880	2529.99	2525.67	2534.31	1.00341	0.00490869	0.956768	0.976264	Up	20.2056	17.8035	21.2606	20.609	19.7371	19.0961	102600153	GEP	Probable glutamyl endopeptidase, chloroplastic	GO:0009570,GO:0008236	chloroplast stroma|serine-type peptidase activity
Soltu.DM.01G024890	581.031	593.638	568.424	0.957502	-0.0626527	0.618627	0.763832	Down	4.7518	5.38547	5.18325	5.20967	5.80825	5.07965	102599599		Protein WHAT'S THIS FACTOR 1 homolog, chloroplastic	GO:0009507,GO:0003723,GO:0000373,GO:0006397,GO:0015979	chloroplast|RNA binding|Group II intron splicing|mRNA processing|photosynthesis
Soltu.DM.01G024900	3819.24	3744.77	3893.71	1.03975	0.0562387	0.491055	0.664502	Up	302.987	268.029	293.209	270.611	267.486	298.769	102599273		Cytochrome c oxidase subunit 5C-2	GO:0016021,GO:0005746	integral component of membrane|mitochondrial respiratory chain
Soltu.DM.01G024910	16.3351	4.54762	28.1225	6.11927	2.61336	0.00144044	0.00660112	Up	1.15028	0.955947	0.751661	0	0.392234	0.0700277
Soltu.DM.01G024920	35.2138	13.4164	57.0113	4.2592	2.09058	5.22e-05	0.00033504	Up	1.78424	2.28995	2.98724	0.296598	0.358526	1.02415	102598953
Soltu.DM.01G024930	98.0427	122.293	73.7927	0.603532	-0.728498	0.00550897	0.0210331	Down	0.812827	0.664804	0.885667	1.3804	1.19481	1.36817	102598625	TBL6	Protein trichome birefringence-like 6	GO:0005794,GO:0016021,GO:0016413	Golgi apparatus|integral component of membrane|O-acetyltransferase activity
Soltu.DM.01G024940	5255.98	6528.09	3983.87	0.610236	-0.712562	8.55e-23	3.52e-21	Down	38.0218	38.6381	35.739	60.3153	63.277	61.7756	102598283	EZA1	Histone-lysine N-methyltransferase EZA1	GO:0005677,GO:0005634,GO:0031519,GO:0009506,GO:0003700,GO:0018024,GO:0003727,GO:0006349	chromatin silencing complex|nucleus|PcG protein complex|plasmodesma|DNA-binding transcription factor activity|histone-lysine N-methyltransferase activity|single-stranded RNA binding|regulation of gene expression by genetic imprinting	sot00310	Lysine degradation
Soltu.DM.01G024950	1.77369	2.57994	0.967433	0.37558	-1.41281	0.531884	0.69777	Down	0	0.0171085	0.0339236	0	0.135716	0	102594224	RGL2	DELLA protein RGL2
Soltu.DM.01G024960	13.4037	15.8708	10.9365	0.686885	-0.54186	0.437911	0.61769	Down	0.306966	0.186617	0.205574	0.240559	0.514016	0.264298	102597958	RGA2	DELLA protein RGA2	GO:0005634,GO:0003712,GO:0009740	nucleus|transcription coregulator activity|gibberellic acid mediated signaling pathway
Soltu.DM.01G024980	548.92	537.624	560.216	1.04155	0.0587322	0.738285	0.847014	Up	14.3039	7.85134	10.5225	10.5354	10.299	10.731	102597639	WRKY35	Probable WRKY transcription factor 35	GO:0005634,GO:0003700,GO:0043565,GO:0044212,GO:0009793,GO:0009555	nucleus|DNA-binding transcription factor activity|sequence-specific DNA binding|transcription regulatory region DNA binding|embryo development ending in seed dormancy|pollen development
Soltu.DM.01G024990	1983.03	2462.9	1503.16	0.610176	-0.712703	6.7e-14	1.45e-12	Down	27.7357	26.2126	23.422	39.9719	44.8153	42.7928	102597315
Soltu.DM.01G025000	183.141	247.73	118.551	0.478611	-1.06307	1.53e-06	1.3e-05	Down	13.1134	14.1571	12.8388	34.9551	27.3141	22.0318
Soltu.DM.01G025010	1016.72	1049.98	983.454	0.936819	-0.0941577	0.343679	0.528863	Down	8.79787	9.08623	9.44619	9.70662	9.34044	10.3311	102596991	ALE2	Receptor-like serine/threonine-protein kinase ALE2
Soltu.DM.01G025020	1737.5	1744.46	1730.54	0.992054	-0.0115087	0.89167	0.939829	Down	14.0535	14.3126	13.5895	14.5643	13.7086	14.3006	102596658	RH24	DEAD-box ATP-dependent RNA helicase 24	GO:0005524,GO:0004386,GO:0003723	ATP binding|helicase activity|RNA binding	sot03040	Spliceosome
Soltu.DM.01G025030	306.803	341.352	272.253	0.797605	-0.326253	0.0557651	0.141212	Down	3.93533	5.17237	4.12742	5.02276	6.0983	5.57781			Pentatricopeptide repeat-containing protein At1g02370, mitochondrial
Soltu.DM.01G025040	129.614	142.626	116.602	0.818005	-0.289819	0.231956	0.403203	Down	5.53987	6.41893	5.00687	8.1637	5.56928	7.16908	102593579
Soltu.DM.01G025050	438.38	487.507	389.253	0.799064	-0.323617	0.0495572	0.128553	Down	3.02558	4.01498	4.03544	5.41238	3.88965	4.66664	107057673
Soltu.DM.01G025060	29.0115	36.7072	21.3158	0.580528	-0.784563	0.126001	0.263409	Down	0.900917	1.33123	1.26701	1.12321	3.00964	1.92307	102596329		Pentatricopeptide repeat-containing protein At1g02370, mitochondrial
Soltu.DM.01G025070	109.682	119.039	100.325	0.84384	-0.244958	0.358972	0.544579	Down	1.41383	2.30777	1.94296	2.2601	1.94327	2.56803	102596002
Soltu.DM.01G025080	8.37442	14.0883	2.66055	0.188219	-2.40952	0.0198812	0.0614072	Down	0.0428485	0.0101303	0.0301302	0.288473	0.110495	0.0430414	102595658	STS1	Stachyose synthase	GO:0005737,GO:0047268,GO:0009312,GO:0033532	cytoplasm|galactinol-raffinose galactosyltransferase activity|oligosaccharide biosynthetic process|stachyose biosynthetic process	sot00052	Galactose metabolism
Soltu.DM.01G025110	3044.26	1427.88	4660.63	3.26418	1.70672	2.77e-76	8.76e-74	Up	76.021	85.4173	93.9354	26.4115	26.5585	25.7691	102577801	WRKY28	WRKY transcription factor 28	GO:0005634,GO:0003700,GO:0043565,GO:0042659	nucleus|DNA-binding transcription factor activity|sequence-specific DNA binding|regulation of cell fate specification
Soltu.DM.01G025120	11933.1	14154.3	9711.96	0.686131	-0.543443	1.64e-14	3.73e-13	Down	85.5722	86.7348	79.8212	124.205	126.869	118.695	102594667		Probable pre-mRNA-splicing factor ATP-dependent RNA helicase DEAH2			sot03040	Spliceosome
Soltu.DM.01G025130	2.66243	5.32486	0	0.0341395	-4.87241	0.0134662	0.0446828	Down	0	0	0	0.0101401	0.0572008	0.0919113	102594336	LACS1	Long chain acyl-CoA synthetase 1	GO:0005783,GO:0005524,GO:0102391,GO:0004467,GO:0031957,GO:0010143,GO:0006631,GO:0010025	endoplasmic reticulum|ATP binding|decanoate-CoA ligase activity|long-chain fatty acid-CoA ligase activity|very long-chain fatty acid-CoA ligase activity|cutin biosynthetic process|fatty acid metabolic process|wax biosynthetic process	sot00061,sot00071,sot04146	Fatty acid biosynthesis|Fatty acid degradation|Peroxisome
Soltu.DM.01G025140	2711.56	2845.3	2577.81	0.906026	-0.142375	0.0690943	0.16682	Down	18.7201	19.4865	18.4779	21.8534	20.3197	20.8045	102593578	DUF7	DUF724 domain-containing protein 7	GO:0005634,GO:0042803,GO:0009908,GO:0040008	nucleus|protein homodimerization activity|flower development|regulation of growth
Soltu.DM.01G025150	536.88	530.41	543.349	1.02451	0.0349315	0.778966	0.874026	Up	15.5555	14.4877	16.6284	15.4268	14.7525	15.6847	102593251	NIFU1	NifU-like protein 1, chloroplastic	GO:0009507,GO:0009570,GO:0051539,GO:0005506,GO:0005198,GO:0016226,GO:0097428	chloroplast|chloroplast stroma|4 iron, 4 sulfur cluster binding|iron ion binding|structural molecule activity|iron-sulfur cluster assembly|protein maturation by iron-sulfur cluster transfer
Soltu.DM.01G025160	789.935	874.342	705.527	0.807021	-0.309321	0.00563937	0.0214546	Down	7.62356	7.76829	8.44032	9.23305	9.87577	10.6256	102592914	SWC4	SWR1-complex protein 4	GO:0035267,GO:0005634,GO:0000812,GO:0003677,GO:0003714,GO:0006338,GO:0006281,GO:0043968,GO:0043967,GO:0045892	NuA4 histone acetyltransferase complex|nucleus|Swr1 complex|DNA binding|transcription corepressor activity|chromatin remodeling|DNA repair|histone H2A acetylation|histone H4 acetylation|negative regulation of transcription, DNA-templated
Soltu.DM.01G025170	303.587	262.537	344.637	1.31351	0.393429	0.0481705	0.125826	Up	5.48034	7.25182	8.20554	4.42689	4.88503	6.76092	102592578	GA2OX2	Gibberellin 2-beta-dioxygenase 2	GO:0045543,GO:0046872,GO:0009686	gibberellin 2-beta-dioxygenase activity|metal ion binding|gibberellin biosynthetic process	sot00904	Diterpenoid biosynthesis
Soltu.DM.01G025210	421.874	366.317	477.431	1.3029	0.381723	0.00763047	0.0278042	Up	15.5144	13.0086	15.1937	11.4645	11.8389	10.4421	102592234	HLP	50S ribosomal protein HLP, mitochondrial	GO:0005762,GO:0005739,GO:0070180,GO:0003735,GO:0006412	mitochondrial large ribosomal subunit|mitochondrion|large ribosomal subunit rRNA binding|structural constituent of ribosome|translation	sot03010	Ribosome
Soltu.DM.01G025230	1197.65	1475.55	919.757	0.62333	-0.681931	0.0161513	0.0517896	Down	19.0762	15.0783	16.7463	37.5039	22.249	22.4224	102591561	GOLS1	Galactinol synthase 1	GO:0005737,GO:0047216,GO:0046872,GO:0006012,GO:0009737,GO:0009409,GO:0009408,GO:0009644,GO:0042542,GO:0006979,GO:0009651,GO:0009414	cytoplasm|inositol 3-alpha-galactosyltransferase activity|metal ion binding|galactose metabolic process|response to abscisic acid|response to cold|response to heat|response to high light intensity|response to hydrogen peroxide|response to oxidative stress|response to salt stress|response to water deprivation	sot00052	Galactose metabolism
Soltu.DM.01G025250	43.2489	41.8776	44.6202	1.06349	0.0888012	0.861948	0.922363	Up	0.495867	0.526356	0.294128	0.403735	0.702225	0.132149	102591235	BOR1	Boron transporter 1	GO:0005768,GO:0005887,GO:0005773,GO:0015301,GO:0080139,GO:0005452,GO:0046713,GO:0051453,GO:0010036	endosome|integral component of plasma membrane|vacuole|anion:anion antiporter activity|borate efflux transmembrane transporter activity|inorganic anion exchanger activity|borate transport|regulation of intracellular pH|response to boron-containing substance
Soltu.DM.01G025260	16.6865	7.76769	25.6054	3.30434	1.72436	0.0205335	0.0630641	Up	1.522	0.739118	0.809913	0.20514	0.0771469	0.661126
Soltu.DM.01G025280	27.7392	22.377	33.1015	1.47828	0.563921	0.246656	0.420641	Up	3.1451	2.89801	1.73901	2.01083	1.66367	1.62013	102578655	PYRR	Riboflavin biosynthesis intermediates N-glycosidase	GO:0009507,GO:0008703,GO:0008835,GO:0016799,GO:0050661,GO:1901135,GO:0009658,GO:0046443,GO:0009644,GO:0009231	chloroplast|5-amino-6-(5-phosphoribosylamino)uracil reductase activity|diaminohydroxyphosphoribosylaminopyrimidine deaminase activity|hydrolase activity, hydrolyzing N-glycosyl compounds|NADP binding|carbohydrate derivative metabolic process|chloroplast organization|FAD metabolic process|response to high light intensity|riboflavin biosynthetic process	sot00740	Riboflavin metabolism
Soltu.DM.01G025300	2.03037	3.37489	0.685851	0.200116	-2.32109	0.249331	0.423806	Down	0.250419	0	0	0.249767	0.117412	0.880414	102600414		Exonuclease V, chloroplastic	GO:0009507,GO:0005634,GO:0051539,GO:0003677,GO:0046872,GO:0045145,GO:0036297	chloroplast|nucleus|4 iron, 4 sulfur cluster binding|DNA binding|metal ion binding|single-stranded DNA 5'-3' exodeoxyribonuclease activity|interstrand cross-link repair
Soltu.DM.01G025310	21.3939	23.305	19.4829	0.835191	-0.259822	0.64399	0.782553	Down	1.42029	1.88041	0.732394	1.41659	1.79798	1.64069	102600414
Soltu.DM.01G025320	8.47709	6.05704	10.8971	1.79531	0.844234	0.445108	0.624128	Up	0.662252	0.0671017	0.0221754	0.117951	0.0665368	0.237584		PYRR	Riboflavin biosynthesis intermediates N-glycosidase	GO:0009507,GO:0008703,GO:0008835,GO:0016799,GO:0050661,GO:1901135,GO:0009658,GO:0046443,GO:0009644,GO:0009231	chloroplast|5-amino-6-(5-phosphoribosylamino)uracil reductase activity|diaminohydroxyphosphoribosylaminopyrimidine deaminase activity|hydrolase activity, hydrolyzing N-glycosyl compounds|NADP binding|carbohydrate derivative metabolic process|chloroplast organization|FAD metabolic process|response to high light intensity|riboflavin biosynthetic process
Soltu.DM.01G025330	2449.37	2229.09	2669.66	1.19787	0.260473	0.00314923	0.0129662	Up	36.1202	40.9327	40.823	34.4702	30.8174	33.8031	102590525		Probable protein phosphatase 2C 2	GO:0046872,GO:0004722	metal ion binding|protein serine/threonine phosphatase activity
Soltu.DM.01G025360	198.839	182.254	215.424	1.18215	0.24141	0.263907	0.441153	Up	1.41702	1.86301	2.14676	1.4478	1.81491	1.35397	102589891
Soltu.DM.01G025380	9371.33	9505.42	9237.25	0.971748	-0.0413462	0.566476	0.724365	Down	332.342	335.262	313.029	325.447	355.727	334.313	102593024	UBI3	40S ribosomal protein S27a	GO:0005634,GO:0005840,GO:0046872,GO:0003735,GO:0006412	nucleus|ribosome|metal ion binding|structural constituent of ribosome|translation	sot03010,sot04120	Ribosome|Ubiquitin mediated proteolysis
Soltu.DM.01G025390	249.341	264.323	234.359	0.886341	-0.174067	0.299942	0.481386	Down	3.93877	3.50573	3.86357	4.15959	4.48494	4.18924	102589230	TRM13	tRNA:m(4)X modification enzyme TRM13	GO:0005737,GO:0005634,GO:0046872,GO:0106050,GO:0008175,GO:0009651,GO:0030488	cytoplasm|nucleus|metal ion binding|tRNA 2'-O-methyltransferase activity|tRNA methyltransferase activity|response to salt stress|tRNA methylation
Soltu.DM.01G025400	420.714	431.318	410.11	0.950571	-0.0731335	0.636179	0.776532	Down	17.772	12.9283	17.3788	16.1216	16.9669	17.8116	102588906	ATG8I	Autophagy-related protein 8i	GO:0000421,GO:0031410,GO:0005874,GO:0019779,GO:0019776,GO:0019786,GO:0006914,GO:0006995,GO:0015031	autophagosome membrane|cytoplasmic vesicle|microtubule|Atg8 activating enzyme activity|Atg8 ligase activity|Atg8-specific protease activity|autophagy|cellular response to nitrogen starvation|protein transport	sot04136	Autophagy - other
Soltu.DM.01G025420	559.778	631.579	487.977	0.77247	-0.372449	0.00768338	0.027964	Down	3.33435	3.72421	2.70166	4.22893	4.34264	4.14191	102588580	RTT10	Regulator of Ty1 transposition protein 10	GO:0005737,GO:0005768,GO:0032456,GO:0008033	cytoplasm|endosome|endocytic recycling|tRNA processing
Soltu.DM.01G025430	424.005	450.249	397.761	0.883112	-0.179331	0.217824	0.386282	Down	5.47646	5.93595	4.87128	5.82633	6.79454	5.92428	102588244	TKPR2	Tetraketide alpha-pyrone reductase 2	GO:0005829,GO:0050662,GO:0016491,GO:0016616,GO:0010584,GO:0080110	cytosol|coenzyme binding|oxidoreductase activity|oxidoreductase activity, acting on the CH-OH group of donors, NAD or NADP as acceptor|pollen exine formation|sporopollenin biosynthetic process
Soltu.DM.01G025440	12145.8	10897.6	13394.1	1.22912	0.297626	1.86e-05	0.000130252	Up	88.9713	98.096	95.4435	75.9242	75.1337	80.346	102587921	SPL1	Squamosa promoter-binding-like protein 1	GO:0005634,GO:0003677,GO:0003700,GO:0046872,GO:0006355	nucleus|DNA binding|DNA-binding transcription factor activity|metal ion binding|regulation of transcription, DNA-templated
Soltu.DM.01G025470	35.4568	34.9453	35.9683	1.03024	0.0429752	0.923007	0.957366	Up	2.95765	4.49954	6.02831	3.46298	4.944	4.77939	102604548
Soltu.DM.01G025490	966.361	259.709	1673.01	6.43672	2.68632	1.41e-91	7.58e-89	Up	17.4176	21.1298	19.2056	2.76349	3.56415	2.68803	102587599
Soltu.DM.01G025510	394.766	422.552	366.98	0.868726	-0.203027	0.216039	0.38422	Down	13.6627	11.4245	13.3828	16.7111	11.7667	16.144	102586947
Soltu.DM.01G025520	1104.33	1137.3	1071.36	0.941804	-0.0865017	0.460019	0.636296	Down	61.7346	66.987	57.0444	63.4126	75.0117	59.9216	102584890	RPS11	40S ribosomal protein S11	GO:0022627,GO:0019843,GO:0003735,GO:0006412	cytosolic small ribosomal subunit|rRNA binding|structural constituent of ribosome|translation	sot03010	Ribosome
Soltu.DM.01G025530	1402.01	1553.79	1250.22	0.804825	-0.313253	0.00151089	0.00686279	Down	13.5641	14.9615	15.6977	17.873	17.5433	19.926	102586162	LCD	L-cysteine desulfhydrase	GO:0005829,GO:0080146,GO:0019450	cytosol|L-cysteine desulfhydrase activity|L-cysteine catabolic process to pyruvate	sot00270	Cysteine and methionine metabolism
Soltu.DM.01G025540	2020.91	2075.54	1966.27	0.947261	-0.0781663	0.33868	0.523544	Down	16.2433	15.9323	15.2603	16.4898	17.0009	16.9066	102585604	SEC23	Protein transport protein SEC23	GO:0030127,GO:0005789,GO:0000139,GO:0005096,GO:0008270,GO:0090114,GO:0006886,GO:0016236,GO:0003400	COPII vesicle coat|endoplasmic reticulum membrane|Golgi membrane|GTPase activator activity|zinc ion binding|COPII-coated vesicle budding|intracellular protein transport|macroautophagy|regulation of COPII vesicle coating
Soltu.DM.01G025550	2342.25	2544.85	2139.66	0.840691	-0.250353	0.00335947	0.0137141	Down	20.8879	18.5417	19.3455	24.4044	23.2713	22.6761	102584946	SECA1	Protein translocase subunit SECA1, chloroplastic	GO:0009941,GO:0009570,GO:0009535,GO:0005524,GO:0015462,GO:0009658,GO:0017038,GO:0006605,GO:0010109	chloroplast envelope|chloroplast stroma|chloroplast thylakoid membrane|ATP binding|ATPase-coupled protein transmembrane transporter activity|chloroplast organization|protein import|protein targeting|regulation of photosynthesis	sot03060	Protein export
Soltu.DM.01G025560	351.928	292.778	411.078	1.40407	0.489613	0.00126892	0.00589813	Up	8.62121	9.98146	8.65886	5.92156	6.63383	6.992	102585265
Soltu.DM.01G025570	13.5593	3.01832	24.1002	8.01334	3.0024	0.000576427	0.0029341	Up	0.519838	0.737406	1.78709	0.043207	0.0812442	0.261089	102584625		Histone H3.2	GO:0000786,GO:0005634,GO:0003677,GO:0046982	nucleosome|nucleus|DNA binding|protein heterodimerization activity
Soltu.DM.01G025580	1.64692	2.96923	0.324599	0.119104	-3.06971	0.157914	0.309619	Down	0	0.016362	0	0.0172566	0.0811211	0.0521388	102584285	PAT18	Protein S-acyltransferase 18	GO:0030659,GO:0005783,GO:0005789,GO:0005794,GO:0016021,GO:0019706,GO:0018230,GO:0006612	cytoplasmic vesicle membrane|endoplasmic reticulum|endoplasmic reticulum membrane|Golgi apparatus|integral component of membrane|protein-cysteine S-palmitoyltransferase activity|peptidyl-L-cysteine S-palmitoylation|protein targeting to membrane
Soltu.DM.01G025590	2152.87	2100.98	2204.77	1.04935	0.0694935	0.432037	0.612479	Up	27.1831	24.1487	27.6994	25.9719	25.3519	24.465	102583969	PPXI	Protoporphyrinogen oxidase, chloroplastic	GO:0009507,GO:0004729,GO:0015995,GO:0006782	chloroplast|oxygen-dependent protoporphyrinogen oxidase activity|chlorophyll biosynthetic process|protoporphyrinogen IX biosynthetic process	sot00860	Porphyrin metabolism
Soltu.DM.01G025600	73.3961	79.1602	67.6319	0.854464	-0.226908	0.474597	0.650061	Down	0.512719	0.805069	0.589553	0.598221	0.870863	0.7774	102590883	ASY3	Meiosis-specific protein ASY3	GO:0005694,GO:0005730,GO:0051321,GO:0090173	chromosome|nucleolus|meiotic cell cycle|regulation of synaptonemal complex assembly
Soltu.DM.01G025610	465.358	477.378	453.338	0.949918	-0.0741249	0.580032	0.73515	Down	6.48458	6.95989	7.20784	7.93265	7.04781	6.90618	102583629	VPS32.1	Vacuolar protein sorting-associated protein 32 homolog 1	GO:0000815,GO:0005886,GO:0015031,GO:0007034	ESCRT III complex|plasma membrane|protein transport|vacuolar transport	sot04144	Endocytosis
Soltu.DM.01G025680	3.13997	0.661348	5.6186	8.44814	3.07863	0.0615844	0.152522	Up	0.120455	0.151883	0.0564677	0	0.0188256	0.0201662	107062550
Soltu.DM.01G025690	758.556	704.049	813.063	1.15516	0.208095	0.0907084	0.206085	Up	7.97362	9.77084	8.87627	8.49049	7.47706	7.23113	102594574	ABC1	Protein ABC transporter 1, mitochondrial	GO:0005743,GO:0005739,GO:0005524,GO:0016301,GO:0005215,GO:0015996,GO:0010224,GO:0006744	mitochondrial inner membrane|mitochondrion|ATP binding|kinase activity|transporter activity|chlorophyll catabolic process|response to UV-B|ubiquinone biosynthetic process
Soltu.DM.01G025700	4168.98	3583.23	4754.73	1.327	0.408169	1.76e-06	1.48e-05	Up	23.4422	22.1444	26.3425	17.6367	17.6374	19.3	102603371	SDT1	Suppressor of disruption of TFIIS	GO:0008252,GO:0009166,GO:0006206	nucleotidase activity|nucleotide catabolic process|pyrimidine nucleobase metabolic process
Soltu.DM.01G025710	652.516	662.832	642.199	0.969008	-0.0454188	0.695407	0.819082	Down	16.3571	15.8822	15.9147	17.4688	15.2902	17.2833	102603035	CSU2	Protein COP1 SUPPRESSOR 2	GO:0016607,GO:0005634,GO:0005681,GO:1904667,GO:0080022,GO:0048024,GO:0010099,GO:0055121	nuclear speck|nucleus|spliceosomal complex|negative regulation of ubiquitin protein ligase activity|primary root development|regulation of mRNA splicing, via spliceosome|regulation of photomorphogenesis|response to high fluence blue light stimulus by blue high-fluence system
Soltu.DM.01G025720	2508.75	2324.74	2692.77	1.15831	0.212021	0.0187265	0.0585636	Up	48.495	42.7089	44.3828	42.357	36.2925	39.1892	102601920	LNK2	Protein LNK2	GO:0005634,GO:0048511	nucleus|rhythmic process
Soltu.DM.01G025730	5.4828	3.70007	7.26552	1.96758	0.976421	0.351944	0.537285	Up	0.667785	0.552576	0.547836	0.333022	0.15655	0.419245
Soltu.DM.01G025750	136.782	176.51	97.0548	0.550444	-0.861331	0.000360534	0.00193153	Down	1.1149	1.8117	1.51643	2.52157	2.66522	2.94966	102601585
Soltu.DM.01G025760	160.155	142.391	177.919	1.24871	0.320435	0.137062	0.279697	Up	3.79217	3.32429	3.93496	2.50736	3.41617	2.97463	102600905	ROMT	Trans-resveratrol di-O-methyltransferase	GO:0008171,GO:0046983,GO:0102303,GO:0008757,GO:0019438	O-methyltransferase activity|protein dimerization activity|resveratrol 3,5-O-dimethyltransferase activity|S-adenosylmethionine-dependent methyltransferase activity|aromatic compound biosynthetic process
Soltu.DM.01G025770	129.619	121.38	137.857	1.13658	0.184698	0.539079	0.702764	Up	3.63924	2.2434	4.9538	4.05995	2.30035	3.24944	102601252	ROMT	Trans-resveratrol di-O-methyltransferase	GO:0008171,GO:0046983,GO:0102303,GO:0008757,GO:0019438	O-methyltransferase activity|protein dimerization activity|resveratrol 3,5-O-dimethyltransferase activity|S-adenosylmethionine-dependent methyltransferase activity|aromatic compound biosynthetic process
Soltu.DM.01G025780	4604.68	4705.04	4504.32	0.957358	-0.0628691	0.405295	0.589087	Down	134.027	147.269	140.882	149.389	151.335	143.059	102600569	RPS16	40S ribosomal protein S16	GO:0005840,GO:0003735,GO:0006412	ribosome|structural constituent of ribosome|translation	sot03010	Ribosome
Soltu.DM.01G025790	2.85175	1.35542	4.34807	3.21598	1.68526	0.364376	0.54967	Up	0.266802	0.216267	0	0	0	0.153145	107058583
Soltu.DM.01G025810	2.47245	0.661348	4.28355	6.44617	2.68844	0.125371	0.262713	Up	0.0535104	0.0759061	0.0376275	0	0.0125445	0.0134378	102605618		CSC1-like protein At3g54510	GO:0016021,GO:0005886,GO:0005227	integral component of membrane|plasma membrane|calcium activated cation channel activity
Soltu.DM.01G025820	252.557	238.244	266.87	1.11933	0.162633	0.362791	0.548452	Up	4.74103	4.13125	4.30219	3.39451	4.5093	3.92896	102605284	PUB44	U-box domain-containing protein 44	GO:0005737,GO:0005634,GO:0005886,GO:0070696,GO:0004842,GO:0010150,GO:0090359,GO:0010115,GO:0010380,GO:0010271	cytoplasm|nucleus|plasma membrane|transmembrane receptor protein serine/threonine kinase binding|ubiquitin-protein transferase activity|leaf senescence|negative regulation of abscisic acid biosynthetic process|regulation of abscisic acid biosynthetic process|regulation of chlorophyll biosynthetic process|regulation of chlorophyll catabolic process
Soltu.DM.01G025830	929.619	824.567	1034.67	1.25491	0.327582	0.00502829	0.0194414	Up	9.40932	9.91298	11.8013	8.12938	8.7653	8.06295	102600239	PUB44	U-box domain-containing protein 44	GO:0005737,GO:0005634,GO:0005886,GO:0070696,GO:0004842,GO:0010150,GO:0090359,GO:0010115,GO:0010380,GO:0010271	cytoplasm|nucleus|plasma membrane|transmembrane receptor protein serine/threonine kinase binding|ubiquitin-protein transferase activity|leaf senescence|negative regulation of abscisic acid biosynthetic process|regulation of abscisic acid biosynthetic process|regulation of chlorophyll biosynthetic process|regulation of chlorophyll catabolic process
Soltu.DM.01G025840	5228.6	5999.29	4457.92	0.743048	-0.428473	1.61e-09	2.15e-08	Down	23.3081	23.5367	22.0818	30.1978	31.2159	31.9579	102599903	cwf11	Pre-mRNA-splicing factor cwf11	GO:0071013,GO:0005634,GO:0071014,GO:0005681,GO:0005684,GO:0003729,GO:0045292	catalytic step 2 spliceosome|nucleus|post-mRNA release spliceosomal complex|spliceosomal complex|U2-type spliceosomal complex|mRNA binding|mRNA cis splicing, via spliceosome	sot03040	Spliceosome
Soltu.DM.01G025860	318.609	357.939	279.279	0.780035	-0.358389	0.0168724	0.0537874	Down	5.15946	4.62422	4.85423	6.22183	6.30477	6.35647
Soltu.DM.01G025870	17775.8	19863	15688.5	0.789826	-0.340392	3.04e-07	2.93e-06	Down	148.009	142.813	138.849	176.546	179.488	191.628		PICBP	Calmodulin binding protein PICBP	GO:0005886,GO:0005516,GO:0006952	plasma membrane|calmodulin binding|defense response
Soltu.DM.01G025880	591.781	630.028	553.533	0.87853	-0.186836	0.157711	0.309355	Down	11.3592	11.6107	9.24633	13.0022	11.3632	12.5534	102598935	TFCA	Tubulin-folding cofactor A	GO:0005829,GO:0048487,GO:0007023,GO:0007021	cytosol|beta-tubulin binding|post-chaperonin tubulin folding pathway|tubulin complex assembly
Soltu.DM.01G025900	31.3108	39.9652	22.6564	0.56722	-0.81802	0.0690223	0.166695	Down	2.44328	2.67541	3.37585	5.2586	5.54693	4.2627	107058584
Soltu.DM.01G025910	24.003	25.691	22.3151	0.870595	-0.199927	0.753799	0.85756	Down	0.465611	0.990725	0.436545	1.13197	0.191019	0.876952
Soltu.DM.01G025920	11023.7	12336.1	9711.25	0.78718	-0.345234	1.21e-05	8.81e-05	Down	91.7176	83.0187	77.0618	103.294	108.639	110.024	102599256	PICBP	Calmodulin binding protein PICBP	GO:0005886,GO:0005516,GO:0006952	plasma membrane|calmodulin binding|defense response
Soltu.DM.01G025930	184.41	192.474	176.345	0.916627	-0.125593	0.54521	0.707432	Down	3.73588	4.51065	3.83311	5.29629	4.05405	3.91792	102598265
Soltu.DM.01G025990	644.44	671.164	617.716	0.920183	-0.120007	0.357162	0.542567	Down	18.8868	14.651	18.7142	19.4742	19.1525	18.5056	102586133	TFCA	Tubulin-folding cofactor A	GO:0005829,GO:0048487,GO:0007023,GO:0007021	cytosol|beta-tubulin binding|post-chaperonin tubulin folding pathway|tubulin complex assembly
Soltu.DM.01G026000	2577.13	2478.37	2675.89	1.07973	0.110677	0.207552	0.373866	Up	21.9473	25.1392	23.5484	20.4633	22.5163	22.8738	102586461		E3 ubiquitin-protein ligase hel2	GO:0005737,GO:0005829,GO:0003676,GO:0061630,GO:0008270,GO:0070647,GO:2000765,GO:0072344	cytoplasm|cytosol|nucleic acid binding|ubiquitin protein ligase activity|zinc ion binding|protein modification by small protein conjugation or removal|regulation of cytoplasmic translation|rescue of stalled ribosome
Soltu.DM.01G026010	31.6363	3.9858	59.2868	14.823	3.88976	3.15e-10	4.6e-09	Up	1.44181	0.799919	1.08144	0.019174	0.0901346	0.115864	102586796	PAP27	Probable inactive purple acid phosphatase 27	GO:0005576,GO:0003993,GO:0046872	extracellular region|acid phosphatase activity|metal ion binding
Soltu.DM.01G026020	1715.62	2061.4	1369.83	0.664353	-0.589977	4.14e-08	4.58e-07	Down	41.4835	41.1427	36.1337	57.3027	67.7057	54.7539	102587141	SUVR3	Histone-lysine N-methyltransferase SUVR3	GO:0005694,GO:0005634,GO:0018024,GO:0046872	chromosome|nucleus|histone-lysine N-methyltransferase activity|metal ion binding	sot00310	Lysine degradation
Soltu.DM.01G026030	33.5557	37.0844	30.0271	0.80861	-0.306484	0.558629	0.717819	Down	0.326441	0.348545	0.246825	0.126035	0.533227	0.486577	102587800		Probable inactive leucine-rich repeat receptor-like protein kinase At3g03770
Soltu.DM.01G026040	78.1645	85.3928	70.9362	0.831223	-0.266692	0.357363	0.542805	Down	0.730123	0.794037	0.992589	1.06806	1.02698	0.953433	102588124	MUS81	Crossover junction endonuclease MUS81	GO:0000794,GO:0048476,GO:0005730,GO:0005634,GO:0048257,GO:0003677,GO:0046872,GO:0051301,GO:0006974,GO:0051026,GO:0006281,GO:0000727,GO:0000724,GO:0031573,GO:0006312,GO:0000712,GO:0007129	condensed nuclear chromosome|Holliday junction resolvase complex|nucleolus|nucleus|3'-flap endonuclease activity|DNA binding|metal ion binding|cell division|cellular response to DNA damage stimulus|chiasma assembly|DNA repair|double-strand break repair via break-induced replication|double-strand break repair via homologous recombination|intra-S DNA damage checkpoint|mitotic recombination|resoluti…	sot03440	Homologous recombination
Soltu.DM.01G026050	3642.06	4112.73	3171.38	0.771143	-0.374929	2.33e-07	2.29e-06	Down	29.518	31.1863	29.9081	39.5871	38.8178	39.8791	102588443	CDC48C	Cell division control protein 48 homolog C	GO:0005856,GO:0005634,GO:0009524,GO:0005524,GO:0016887,GO:1990275,GO:0007049,GO:0051301,GO:0051973,GO:0015031,GO:0042254	cytoskeleton|nucleus|phragmoplast|ATP binding|ATPase activity|preribosome binding|cell cycle|cell division|positive regulation of telomerase activity|protein transport|ribosome biogenesis	sot03008	Ribosome biogenesis in eukaryotes
Soltu.DM.01G026110	507.232	550.297	464.168	0.843194	-0.246063	0.0560944	0.141871	Down	5.22842	4.49954	4.74164	5.48139	5.82523	5.96081	102599251	MTO1	Mitochondrial translation optimization protein 1	GO:0005759,GO:0005739,GO:0050660,GO:0016740,GO:0070899,GO:0030488,GO:0006400,GO:0002098	mitochondrial matrix|mitochondrion|flavin adenine dinucleotide binding|transferase activity|mitochondrial tRNA wobble uridine modification|tRNA methylation|tRNA modification|tRNA wobble uridine modification
Soltu.DM.01G026120	159	157.725	160.276	1.01622	0.0232074	0.921389	0.956353	Up	1.27446	0.914561	1.31439	1.42068	1.06152	0.986502	102599573	CHR24	Protein CHROMATIN REMODELING 24	GO:0005634,GO:0005524,GO:0003677,GO:0004386,GO:0006310,GO:0045951,GO:0046686	nucleus|ATP binding|DNA binding|helicase activity|DNA recombination|positive regulation of mitotic recombination|response to cadmium ion
Soltu.DM.01G026130	925.562	884.129	966.994	1.09369	0.12921	0.223587	0.393001	Up	10.0709	9.32106	9.4039	8.50636	8.36143	9.64428	102588771	PERK2	Proline-rich receptor-like protein kinase PERK2
Soltu.DM.01G026140	1856.23	2139.02	1573.43	0.735616	-0.442975	3.17e-07	3.04e-06	Down	12.1656	11.9704	12.2921	17.7018	16.0992	16.0412	102589639	rad4	S-M checkpoint control protein rad4	GO:0005829,GO:0031261,GO:0072686,GO:0044732,GO:0000790,GO:0043596,GO:0005634,GO:0035861,GO:0032947,GO:0033314,GO:1902977,GO:0007095,GO:0031297	cytosol|DNA replication preinitiation complex|mitotic spindle|mitotic spindle pole body|nuclear chromatin|nuclear replication fork|nucleus|site of double-strand break|protein-containing complex scaffold activity|mitotic DNA replication checkpoint|mitotic DNA replication preinitiation complex assembly|mitotic G2 DNA damage checkpoint|replication fork processing	sot03440	Homologous recombination
Soltu.DM.01G026160	1020.13	1081.01	959.248	0.887436	-0.172285	0.0901618	0.205145	Down	12.6549	14.2408	12.6471	15.1181	14.8501	14.885	102590291	UBP24	Ubiquitin carboxyl-terminal hydrolase 24	GO:0005634,GO:0004197,GO:0004843,GO:0016579,GO:0006511	nucleus|cysteine-type endopeptidase activity|thiol-dependent ubiquitin-specific protease activity|protein deubiquitination|ubiquitin-dependent protein catabolic process
Soltu.DM.01G026170	1390.72	1384.12	1397.31	1.00953	0.0136823	0.893334	0.940899	Up	21.7529	18.2713	21.9057	21.0746	19.4289	21.2553	102590630		NADP-specific glutamate dehydrogenase	GO:0009507,GO:0004354,GO:0006520	chloroplast|glutamate dehydrogenase (NADP+) activity|cellular amino acid metabolic process	sot00220,sot00250,sot00910	Arginine biosynthesis|Alanine, aspartate and glutamate metabolism|Nitrogen metabolism
Soltu.DM.01G026180	94.1993	94.154	94.2447	1.001	0.00144704	0.995685	0.99807	Up	8.95617	7.05811	9.62165	8.18843	8.13597	9.46506
Soltu.DM.01G026190	1139.89	1145.17	1134.61	0.990973	-0.0130817	0.895871	0.942346	Down	13.257	14.8046	13.4652	14.6249	13.1966	14.376	102590978	ELD1	Glycosyltransferase-like KOBITO 1	GO:0005737,GO:0005768,GO:0005576,GO:0005794,GO:0009505,GO:0005886,GO:0005802,GO:0016757,GO:0009738,GO:0007049,GO:0030154,GO:0051301,GO:0071482,GO:0030244,GO:0010215,GO:0060560,GO:0010078,GO:0009831,GO:0009663,GO:0040008,GO:2001009,GO:0009737,GO:0009749,GO:0009416,GO:0009826	cytoplasm|endosome|extracellular region|Golgi apparatus|plant-type cell wall|plasma membrane|trans-Golgi network|transferase activity, transferring glycosyl groups|abscisic acid-activated signaling pathway|cell cycle|cell differentiation|cell division|cellular response to light stimulus|cellulose biosynthetic process|cellulose microfibril organization|developmental growth involved in morphogenesi…
Soltu.DM.01G026200	106.645	131.691	81.599	0.619715	-0.690324	0.00575529	0.0218384	Down	2.99651	3.56134	3.07521	5.49274	5.42994	4.71837	102591318
Soltu.DM.01G026210	12.552	9.60715	15.4969	1.61079	0.68777	0.435128	0.61527	Up	0.962285	0.0505567	1.40344	0.373247	0.701835	0.429608
Soltu.DM.01G026220	238.149	248.234	228.063	0.919496	-0.121085	0.519083	0.686962	Down	2.51511	3.18769	2.91724	3.2456	2.62594	3.58129	102591649		Pentatricopeptide repeat-containing protein At4g20740
Soltu.DM.01G026230	450.398	397.665	503.131	1.26493	0.339058	0.0136095	0.0450915	Up	5.50493	5.553	5.25512	3.81568	4.49469	4.66954	102592317
Soltu.DM.01G026240	1122.64	1081.05	1164.23	1.07689	0.106877	0.30986	0.492785	Up	18.8547	20.2605	21.0337	17.0734	20.1398	18.993		CHLP	Geranylgeranyl diphosphate reductase, chloroplastic	GO:0009507,GO:0071949,GO:0102067,GO:0045550,GO:0015995,GO:0033385,GO:0015979,GO:0033521,GO:0010189	chloroplast|FAD binding|geranylgeranyl diphosphate reductase activity|geranylgeranyl reductase activity|chlorophyll biosynthetic process|geranylgeranyl diphosphate metabolic process|photosynthesis|phytyl diphosphate biosynthetic process|vitamin E biosynthetic process
Soltu.DM.01G026370	6.71194	9.13791	4.28597	0.469712	-1.09015	0.346579	0.531759	Down	0.27988	0	0.419854	0.893283	0.10498	0.506053	107059602	LAP	Leucine aminopeptidase, chloroplastic	GO:0009507,GO:0004177,GO:0030145,GO:0008235	chloroplast|aminopeptidase activity|manganese ion binding|metalloexopeptidase activity	sot00480	Glutathione metabolism
Soltu.DM.01G026380	1.18118	2.36236	0	0.0770642	-3.69779	0.150151	0.299076	Down	0	0	0	0.150018	0.0282086	0.0302174	102602923		Putative germin-like protein 2-3	GO:0048046,GO:0005618,GO:0030145,GO:0045735	apoplast|cell wall|manganese ion binding|nutrient reservoir activity
Soltu.DM.01G026430	7.75044	9.27368	6.2272	0.671433	-0.574684	0.54096	0.704249	Down	0.0736147	0.0556932	0.138039	0.16153	0.193285	0.0443677	102604603
Soltu.DM.01G026440	816.08	934.306	697.854	0.746869	-0.421072	0.000404946	0.00214296	Down	11.4633	12.9927	10.0949	15.6002	15.6384	15.3191	102593658	FBW2	F-box protein FBW2	GO:0005634,GO:0019005,GO:0010629,GO:0010608,GO:0016567,GO:0009737,GO:0031146,GO:0006511	nucleus|SCF ubiquitin ligase complex|negative regulation of gene expression|posttranscriptional regulation of gene expression|protein ubiquitination|response to abscisic acid|SCF-dependent proteasomal ubiquitin-dependent protein catabolic process|ubiquitin-dependent protein catabolic process
Soltu.DM.01G026450	20.2249	21.9169	18.533	0.843838	-0.244961	0.660621	0.794618	Down	0.139103	0.11361	0.0889225	0.126128	0.171944	0.107973		AAO3	Abscisic-aldehyde oxidase	GO:0005829,GO:0051537,GO:0010293,GO:0004031,GO:0009055,GO:0071949,GO:0050302,GO:0005506,GO:0031625,GO:0009688,GO:0009851	cytosol|2 iron, 2 sulfur cluster binding|abscisic aldehyde oxidase activity|aldehyde oxidase activity|electron transfer activity|FAD binding|indole-3-acetaldehyde oxidase activity|iron ion binding|ubiquitin protein ligase binding|abscisic acid biosynthetic process|auxin biosynthetic process
Soltu.DM.01G026460	424.334	503.217	345.451	0.686939	-0.541747	0.000532713	0.00273355	Down	7.81974	9.81472	11.3208	14.8819	13.9646	13.6018		AAO3	Abscisic-aldehyde oxidase	GO:0005829,GO:0051537,GO:0010293,GO:0004031,GO:0009055,GO:0071949,GO:0050302,GO:0005506,GO:0031625,GO:0009688,GO:0009851	cytosol|2 iron, 2 sulfur cluster binding|abscisic aldehyde oxidase activity|aldehyde oxidase activity|electron transfer activity|FAD binding|indole-3-acetaldehyde oxidase activity|iron ion binding|ubiquitin protein ligase binding|abscisic acid biosynthetic process|auxin biosynthetic process
Soltu.DM.01G026470	446.981	518.616	375.346	0.724036	-0.465866	0.00638667	0.0238565	Down	3.27177	4.39843	4.02989	6.50516	5.38407	4.37126	102598224	AAO1	Indole-3-acetaldehyde oxidase	GO:0005737,GO:0051537,GO:0004031,GO:0009055,GO:0071949,GO:0050302,GO:0005506,GO:0009688,GO:0009851	cytoplasm|2 iron, 2 sulfur cluster binding|aldehyde oxidase activity|electron transfer activity|FAD binding|indole-3-acetaldehyde oxidase activity|iron ion binding|abscisic acid biosynthetic process|auxin biosynthetic process	sot00906	Carotenoid biosynthesis
Soltu.DM.01G026480	105.282	87.6245	122.94	1.40174	0.487217	0.0581732	0.145888	Up	2.04016	1.46412	1.68218	1.16895	1.32968	1.22089	102577493	CKX6	Cytokinin dehydrogenase 6	GO:0005615,GO:0019139,GO:0071949,GO:0009690,GO:0010103	extracellular space|cytokinin dehydrogenase activity|FAD binding|cytokinin metabolic process|stomatal complex morphogenesis	sot00908	Zeatin biosynthesis
Soltu.DM.01G026490	8.57268	10.9325	6.21282	0.568714	-0.814226	0.372802	0.557949	Down	0.195533	0.801289	0.183327	0.58507	0.977899	0.523769		PATROL1	Protein unc-13 homolog	GO:0005737,GO:0005886,GO:0009506,GO:0010118	cytoplasm|plasma membrane|plasmodesma|stomatal movement
Soltu.DM.01G026500	28.9324	25.4289	32.4359	1.27405	0.349427	0.49425	0.667246	Up	0.699254	1.09254	1.08317	0.545816	1.19738	0.519167		PATROL1	Protein unc-13 homolog	GO:0005737,GO:0005886,GO:0009506,GO:0010118	cytoplasm|plasma membrane|plasmodesma|stomatal movement
Soltu.DM.01G026510	1203.91	712.038	1695.79	2.38225	1.25232	5.94e-34	4.51e-32	Up	18.5513	19.1099	21.2472	8.85337	7.78743	8.25821	102595194		Probable glycerol-3-phosphate dehydrogenase [NAD(+)] 1, cytosolic	GO:0005829,GO:0009331,GO:0047952,GO:0004367,GO:0051287,GO:0005975,GO:0046168,GO:0006072,GO:0006116	cytosol|glycerol-3-phosphate dehydrogenase complex|glycerol-3-phosphate dehydrogenase [NAD(P)+] activity|glycerol-3-phosphate dehydrogenase [NAD+] activity|NAD binding|carbohydrate metabolic process|glycerol-3-phosphate catabolic process|glycerol-3-phosphate metabolic process|NADH oxidation	sot00564	Glycerophospholipid metabolism
Soltu.DM.01G026520	320.994	335.649	306.338	0.912635	-0.131891	0.415795	0.59821	Down	8.88779	7.89969	8.33296	8.35968	8.54529	10.8207	102595516
Soltu.DM.01G026530	26.099	23.0439	29.154	1.26675	0.341133	0.50112	0.672977	Up	0.863776	1.51119	1.29577	0.732296	0.890982	1.3015	102595849	STN1	CST complex subunit STN1	GO:1990879,GO:0000784,GO:0005654,GO:0005634,GO:0043047,GO:0042162,GO:0032211,GO:0016233,GO:0010833	CST complex|nuclear chromosome, telomeric region|nucleoplasm|nucleus|single-stranded telomeric DNA binding|telomeric DNA binding|negative regulation of telomere maintenance via telomerase|telomere capping|telomere maintenance via telomere lengthening
Soltu.DM.01G026550	11815	13585.3	10044.6	0.739345	-0.435681	4e-09	5.11e-08	Down	73.35	69.6604	64.1289	90.4503	93.8342	97.7383	102596190		Zinc finger CCCH domain-containing protein 53	GO:0003677,GO:0046872,GO:0003723	DNA binding|metal ion binding|RNA binding
Soltu.DM.01G026560	2399.74	2623.29	2176.2	0.829462	-0.269752	0.00171396	0.00765029	Down	22.7614	20.8669	22.2853	26.5151	28.1533	25.2744	102596969	PPH	Pheophytinase, chloroplastic	GO:0009507,GO:0009570,GO:0009535,GO:0080124,GO:0015996	chloroplast|chloroplast stroma|chloroplast thylakoid membrane|pheophytinase activity|chlorophyll catabolic process
[truncated: 23,477 more rows]

## Sheet: Table S2
Table S2. The list of primers used for qRT-PCR
[truncated: 16 more rows]

## Sheet: Table S3
Table S3. Statistical summary of RNA-seq and its mapping rate
[truncated: 7 more rows]

## Sheet: Table S4
Table S4. Statistics of GO enrichment of 1724 upregulated DEGs
[truncated: 1,336 more rows]

[truncated: 3 more sheets: Table S5, Table S6, Table S7]
